# Supplementary material for: Isobaric Tags for Relative and Absolute Quantitation-Based Proteomics Analysis Revealed Proteins Involved in Drought Response during the Germination Stage in Faba Bean
Source: MDPI journal article supplement (doi:10.3390/metabo14030175), 2024-03-21
Supplement: s1 [file s1]

Table S5 Primers used in present study

| Gene                                   | Forward primer sequence (5'-3')       | Reverse primer sequence (5'-3')      |
|----------------------------------------|---------------------------------------|--------------------------------------|
| <b>qRT-PCR</b>                         |                                       |                                      |
| TRINITY_DN43874_c0_g1                  | AGCAGGTTACCCAGACATTG                  | GTCTGGAAGATTCAGCAGCAAG               |
| TRINITY_DN27544_c0_g1                  | TATGGTAACCTATTAGTGGCGG                | GTTGGTGCTTCCATACTCAGGTT              |
| TRINITY_DN19476_c0_g1                  | TATGGTAACCTATTAGTGGCGG                | TGGTGCTTCCATACTCAGGTTTG              |
| TRINITY_DN2688_c0_g1                   | GCCATAATACAGCCTGGTCCTC                | ACTGAAATGCTGCCGACACG                 |
| TRINITY_DN35534_c0_g1                  | GATACCACTTCAACCGTGCCTC                | CTTTGCGTCATCAATGGCTTC                |
| TRINITY_DN35879_c0_g1                  | CAGCGAAGCGTAGAAGAAATC                 | TCTCTCCAGCACTCTCTCCACG               |
| TRINITY_DN18701_c0_g1                  | GAATCAAGCCTTAGGACAAACCC               | GGAGATACTACGCCTTGGTTT                |
| TRINITY_DN15504_c0_g1                  | GGCATCAAATCCACCAAGACAT                | TATGTCCCGAACTTCACCAGAG               |
| TRINITY_DN1531_c0_g1                   | GAGGCTGTATCAACTCGCAACG                | GATTCTGAACCTCGCCGTGT                 |
| TRINITY_DN31194_c0_g1                  | CTGTCAAAGCAACTGTCGTGGT                | GTTGAACAGTAAGCACTAACAGCGT            |
| TRINITY_DN36890_c0_g1                  | TTCAACTCGCAACATCCGC                   | CACCTTCTCCTTCTTCACTCCCG              |
| TRINITY_DN38601_c0_g1                  | CGGTGGTGAGATTCAAGCAGC                 | CCAAAACAGAATCACAACCACC               |
| TRINITY_DN21602_c0_g1                  | CAATCACTTTGTTTCCAAGAGCC               | CGAAATCCCTCCAGAACAAGAC               |
| NADHD4                                 | AGGGTTAGTGAGCACCATGC                  | ATAGCCAAAGGGAATACGCC                 |
| <b>Ectopic expression or silencing</b> |                                       |                                      |
| H2B.7                                  | CgACgACAAGACCCTATGGCGCCAAAGGGAGAGAAGA | gAggAgAAgAgCCCTTAAGAAGTTGTAAACTTGGTG |
| Hap3                                   | CgACgACAAGACCCTAGGAGCTGAGCAAGCTTTTG   | gAggAgAAgAgCCCTGCATGCCAGTAGCACTTGTC  |
| H2A.3                                  | CgACgACAAGACCCTGCGCCAGTTTACCTATCTGC   | gAggAgAAgAgCCCTGAACCAACCGATATTGCTG   |
| <b>RT-PCR</b>                          |                                       |                                      |
| HAP3                                   | CCCGCAGTTTTGTTTACAGAT                 | GCATGCCAGTAGCACTTGTC                 |
| H2A.3                                  | CAAAGGTTGTGAATGGGTGA                  | CTTATCCTTGTTACCAAAAGACCTC            |
| Actin                                  | CCCTCCCACATgCTATTCT                   | AGAGCCTCCAATCCAGACA                  |
