# Supplementary material for: Isobaric Tags for Relative and Absolute Quantitation-Based Proteomics Analysis Revealed Proteins Involved in Drought Response during the Germination Stage in Faba Bean
Source: Metabolites. 2024 Mar 21;14(3):175. doi: 10.3390/metabo14030175 (PMC10971895; doi:10.3390/metabo14030175)
Supplement: Supplementary file 1 [file metabolites-14-00175-s001.zip]

Archive with 6 entries (6 files):
- Figure S1.pdf
- Table S1.xlsx
- Table S2.xlsx
- Table S3.xlsx
- Table S4.xlsx
- Table S5.pdf
