# Supplementary material for: Isobaric Tags for Relative and Absolute Quantitation-Based Proteomics Analysis Revealed Proteins Involved in Drought Response during the Germination Stage in Faba Bean
Source: Metabolites. 2024 Mar 21;14(3):175. doi: 10.3390/metabo14030175 (PMC10971895; doi:10.3390/metabo14030175)
Supplement: Supplementary file 1 [file metabolites-14-00175-s001.zip › Table S1.xlsx]

## Sheet: C_TvsC_CK
Table S1 DEPs in the comparison of C_T_C_CK
Protein accession	Protein description	C_T/C_CK Ratio	Regulated Type	C_T/C_CK P value	Gene name	MW [kDa]	C_CK.C_CK_3	C_CK.C_CK_2	C_CK.C_CK_1	C_T.C_T_3	C_T.C_T_2	C_T.C_T_1	E_CK.E_CK_3	E_CK.E_CK_2	E_CK.E_CK_1	E_T.E_T_3	E_T.E_T_2	E_T.E_T_1	Subcellular localization	Biological Process	Cellular Component	Molecular Function	KEGG KO No.	KEGG Gene	KEGG pathway	Pfam ID	Domain description
TRINITY_DN31990_c0_g1	PREDICTED: protein SLE1	2.415	Up	0.00072027	---	12.338	0.492	0.516	0.48	0.993	1.271	1.33	0.722	0.607	0.621	1.866	1.814	1.6	nucleus	GO:0000003 reproduction; GO:0001101 response to acid chemical; GO:0003006 developmental process involved in reproduction; GO:0007275 multicellular organism development; GO:0009719 response to endogenous stimulus; GO:0009725 response to hormone; GO:0009737 response to abscisic acid; GO:0009791 post-embryonic development; GO:0010033 response to organic substance; GO:0010154 fruit development; GO:00…	GO:0005622 intracellular; GO:0005623 cell; GO:0005737 cytoplasm; GO:0005829 cytosol; GO:0044424 intracellular part; GO:0044444 cytoplasmic part; GO:0044464 cell part;
TRINITY_DN28942_c0_g1	uncharacterized protein LOC101493592	1.595	Up	0.0020613	---	22.52	0.645	0.565	0.703	1.01	0.989	1.053	1.09	0.904	1.081	1.232	1.657	1.245	plasma membrane
TRINITY_DN45789_c0_g1	putative non-specific lipid-transfer protein AKCS9-like protein	1.515	Up	0.0077046	---	12.408	1.027	0.964	0.836	1.596	1.36	1.328	0.571	0.798	0.929	0.73	0.826	0.96	chloroplast
TRINITY_DN5748_c0_g1	F-box/kelch-repeat protein at1g55270-like protein	2.643	Up	0.0138835	---	42.877	0.867	0.687		2.04	2.067		0.994	0.727		0.233	0.643		cytoplasm		GO:0000151 ubiquitin ligase complex; GO:0005622 intracellular; GO:0005623 cell; GO:0031461 cullin-RING ubiquitin ligase complex; GO:0031463 Cul3-RING ubiquitin ligase complex; GO:0032991 macromolecular complex; GO:0044424 intracellular part; GO:0044464 cell part; GO:1902494 catalytic complex; GO:1990234 transferase complex;					PF00646	F-box domain
TRINITY_DN50754_c0_g1	hypothetical protein TSUD_81540	1.716	Up	6.3725e-05	---	14.581	0.816	0.806	0.76	1.34	1.424	1.324	0.866	0.789	0.823	1.086	1.106	1.186	chloroplast	GO:0009892 negative regulation of metabolic process; GO:0010466 negative regulation of peptidase activity; GO:0010605 negative regulation of macromolecule metabolic process; GO:0010951 negative regulation of endopeptidase activity; GO:0019222 regulation of metabolic process; GO:0030162 regulation of proteolysis; GO:0031323 regulation of cellular metabolic process; GO:0031324 negative regulation o…		GO:0002020 protease binding; GO:0004857 enzyme inhibitor activity; GO:0004866 endopeptidase inhibitor activity; GO:0004869 cysteine-type endopeptidase inhibitor activity; GO:0005488 binding; GO:0005515 protein binding; GO:0019899 enzyme binding; GO:0030234 enzyme regulator activity; GO:0030414 peptidase inhibitor activity; GO:0061134 peptidase regulator activity; GO:0061135 endopeptidase regulato…	K13899	CST3; cystatin-C
TRINITY_DN30450_c0_g1	18 kDa seed maturation protein	1.666	Up	0.038958	---	20.043	0.702	0.821	0.69	1.3	0.895	1.492	0.693	0.855	0.744	1.442	1.49	1.107	mitochondria	GO:0000003 reproduction; GO:0001101 response to acid chemical; GO:0003006 developmental process involved in reproduction; GO:0006950 response to stress; GO:0006970 response to osmotic stress; GO:0007275 multicellular organism development; GO:0009266 response to temperature stimulus; GO:0009409 response to cold; GO:0009414 response to water deprivation; GO:0009415 response to water; GO:0009628 res…	GO:0005622 intracellular; GO:0005623 cell; GO:0005737 cytoplasm; GO:0005829 cytosol; GO:0044424 intracellular part; GO:0044444 cytoplasmic part; GO:0044464 cell part;	GO:0005488 binding; GO:0005543 phospholipid binding; GO:0008289 lipid binding; GO:0030246 carbohydrate binding; GO:0031210 phosphatidylcholine binding; GO:0043167 ion binding; GO:0043168 anion binding; GO:0043169 cation binding; GO:0048030 disaccharide binding; GO:0050997 quaternary ammonium group binding; GO:0070405 ammonium ion binding; GO:0070492 oligosaccharide binding;
TRINITY_DN26678_c0_g1	hypothetical protein TSUD_347110	2.154	Up	2.3334e-05	---	33.091	0.726	0.711	0.729	1.578	1.633	1.454	0.972	0.682	0.638	0.851	1.101	1.294	extracellular				K01183	E3.2.1.14; chitinase [EC:3.2.1.14]	map00520 Amino sugar and nucleotide sugar metabolism; map01100 Metabolic pathways	PF00704	Glycosyl hydrolases family 18
TRINITY_DN31286_c0_g1	oleosin 16 kDa-like	1.85	Up	0.021098	---	18.154	0.631	0.714	0.46	0.964	1.019	1.356	0.952	0.954	0.92	1.355	1.335	1.303	plasma membrane
TRINITY_DN44914_c0_g1	uncharacterized protein LOC25499380	2.611	Up	0.00029865	---	13.331	0.491	0.524	0.539	1.188	1.325	1.545	0.75	0.568	0.651	1.523	1.758	1.463	cytoplasm
TRINITY_DN24839_c0_g1	late embryogenesis abundant protein D-34 isoform X2	2.288	Up	5.7099e-05	---	28.944	0.596	0.629	0.6	1.282	1.415	1.479	0.793	0.647	0.703	1.332	1.418	1.302	cytoplasm
TRINITY_DN10305_c0_g1	hypothetical protein TSUD_269710	2.618	Up	0.000122073	---	50.135	0.459	0.443	0.471	1.083	1.17	1.342	0.917	0.654	0.815	1.627	1.877	1.486	vacuolar membrane							PF13664	Domain of unknown function (DUF4149)
TRINITY_DN13439_c0_g1	unknown	2.582	Up	0.01302	---	39.405		0.471	0.585		1.389	1.338		0.488	0.721		1.839	1.491	nucleus				K13206	CCDC55; coiled-coil domain-containing protein 55
TRINITY_DN890_c0_g1	putative poly	1.809	Up	0.00023883	---	91.626	0.707	0.666	0.646	1.151	1.312	1.189	0.999	0.884	0.993	1.192	1.188	1.232	nucleus	GO:0006139 nucleobase-containing compound metabolic process; GO:0006259 DNA metabolic process; GO:0006260 DNA replication; GO:0006261 DNA-dependent DNA replication; GO:0006266 DNA ligation; GO:0006271 DNA strand elongation involved in DNA replication; GO:0006273 lagging strand elongation; GO:0006281 DNA repair; GO:0006725 cellular aromatic compound metabolic process; GO:0006807 nitrogen compound …	GO:0005622 intracellular; GO:0005623 cell; GO:0005737 cytoplasm; GO:0044424 intracellular part; GO:0044464 cell part;	GO:0003824 catalytic activity; GO:0003909 DNA ligase activity; GO:0003910 DNA ligase (ATP) activity; GO:0016874 ligase activity; GO:0016886 ligase activity, forming phosphoric ester bonds;	K10798	PARP; poly [ADP-ribose] polymerase [EC:2.4.2.30]	map03410 Base excision repair	PF08063; PF05406; PF02877	PADR1 (NUC008) domain; WGR domain; Poly(ADP-ribose) polymerase, regulatory domain
TRINITY_DN4428_c0_g1	seed biotin-containing protein SBP65	1.614	Up	0.004017	---	62.066	0.672	0.693	0.721	1.037	1.029	1.301	0.873	0.856	0.803	1.375	1.439	1.284	cytoplasm
TRINITY_DN20804_c0_g1	P24 oleosin-like	2.077	Up	0.00134431	---	25.357	0.632	0.696	0.514	1.241	1.246	1.338	0.949	0.826	0.918	1.307	1.357	1.33	chloroplast	GO:0000003 reproduction; GO:0003006 developmental process involved in reproduction; GO:0006950 response to stress; GO:0007275 multicellular organism development; GO:0009266 response to temperature stimulus; GO:0009409 response to cold; GO:0009628 response to abiotic stimulus; GO:0009791 post-embryonic development; GO:0009845 seed germination; GO:0010154 fruit development; GO:0010344 seed oilbody …	GO:0005622 intracellular; GO:0005623 cell; GO:0005811 lipid particle; GO:0012511 monolayer-surrounded lipid storage body; GO:0016020 membrane; GO:0043226 organelle; GO:0043228 non-membrane-bounded organelle; GO:0043229 intracellular organelle; GO:0043232 intracellular non-membrane-bounded organelle; GO:0044424 intracellular part; GO:0044464 cell part;	GO:0003676 nucleic acid binding; GO:0003723 RNA binding; GO:0003729 mRNA binding; GO:0005488 binding; GO:0097159 organic cyclic compound binding; GO:1901363 heterocyclic compound binding;
TRINITY_DN10956_c0_g1	hypothetical protein TSUD_230070	1.519	Up	0.00182444	---	43.087	0.814	0.723	0.692	1.105	1.084	1.196	0.939	0.92	0.901	1.219	1.308	1.319	chloroplast	GO:0000271 polysaccharide biosynthetic process; GO:0005975 carbohydrate metabolic process; GO:0005976 polysaccharide metabolic process; GO:0006073 cellular glucan metabolic process; GO:0007275 multicellular organism development; GO:0008152 metabolic process; GO:0009058 biosynthetic process; GO:0009059 macromolecule biosynthetic process; GO:0009250 glucan biosynthetic process; GO:0009653 anatomica…	GO:0005622 intracellular; GO:0005623 cell; GO:0005737 cytoplasm; GO:0005794 Golgi apparatus; GO:0005795 Golgi stack; GO:0005829 cytosol; GO:0012505 endomembrane system; GO:0031984 organelle subcompartment; GO:0043226 organelle; GO:0043227 membrane-bounded organelle; GO:0043229 intracellular organelle; GO:0043231 intracellular membrane-bounded organelle; GO:0044422 organelle part; GO:0044424 intra…	GO:0003824 catalytic activity; GO:0003978 UDP-glucose 4-epimerase activity; GO:0016853 isomerase activity; GO:0016854 racemase and epimerase activity; GO:0016857 racemase and epimerase activity, acting on carbohydrates and derivatives;	K01784	galE, GALE; UDP-glucose 4-epimerase [EC:5.1.3.2]	map00052 Galactose metabolism; map00520 Amino sugar and nucleotide sugar metabolism; map01100 Metabolic pathways
TRINITY_DN6730_c0_g1	N-terminal incomplete legumin A1 pre-pro-polypeptide, partial	2.385	Up	0.0158622	---	59.313	0.535	0.876	0.514	1.246	1.387	1.959	0.903	0.868	1.143	1.34	0.695	0.477	extracellular	GO:0000003 reproduction; GO:0001101 response to acid chemical; GO:0003006 developmental process involved in reproduction; GO:0007275 multicellular organism development; GO:0009719 response to endogenous stimulus; GO:0009725 response to hormone; GO:0009735 response to cytokinin; GO:0009737 response to abscisic acid; GO:0009791 post-embryonic development; GO:0009987 cellular process; GO:0010033 res…		GO:0045735 nutrient reservoir activity;				PF00190	Cupin
TRINITY_DN13854_c0_g1	senescence/dehydration-associated-like protein	1.734	Up	0.0100428	---	40.66	0.751	0.826		1.328	1.407		0.915	0.697		1.134	1.185		chloroplast				K19366	SPG20; spartin	map04144 Endocytosis
TRINITY_DN16294_c0_g1	ataxin-3 homolog	1.582	Up	0.00084434	---	36.674	0.84	0.866	0.865	1.435	1.407	1.225	0.83	0.598	0.778	0.968	1.106	1.212	nucleus				K11863	ATXN3, MJD; Ataxin-3 [EC:3.4.22.-]	map04141 Protein processing in endoplasmic reticulum
TRINITY_DN45850_c0_g1	uncharacterized protein LOC25501049	2.982	Up	0.0141373	---	15.538	0.553		0.529	1.819		1.407	0.629		0.846	1.175		1.349	nucleus
TRINITY_DN28801_c0_g1	hypothetical protein TSUD_298340	2.327	Up	0.00069529	---	19.099	0.636	0.607	0.484	1.384	1.375	1.259	0.897	0.809	0.957	1.126	1.242	1.46	chloroplast	GO:0000003 reproduction; GO:0003006 developmental process involved in reproduction; GO:0006950 response to stress; GO:0007275 multicellular organism development; GO:0009266 response to temperature stimulus; GO:0009409 response to cold; GO:0009628 response to abiotic stimulus; GO:0009791 post-embryonic development; GO:0009845 seed germination; GO:0010154 fruit development; GO:0010344 seed oilbody …	GO:0005622 intracellular; GO:0005623 cell; GO:0005811 lipid particle; GO:0012511 monolayer-surrounded lipid storage body; GO:0016020 membrane; GO:0043226 organelle; GO:0043228 non-membrane-bounded organelle; GO:0043229 intracellular organelle; GO:0043232 intracellular non-membrane-bounded organelle; GO:0044424 intracellular part; GO:0044464 cell part;	GO:0003676 nucleic acid binding; GO:0003723 RNA binding; GO:0003729 mRNA binding; GO:0005488 binding; GO:0097159 organic cyclic compound binding; GO:1901363 heterocyclic compound binding;
TRINITY_DN12139_c0_g1	late embryogenesis abundant protein At3g53040	1.635	Up	0.013797	---	47.062	0.67	0.721	0.713	0.914	1.192	1.335	0.944	0.904	0.818	1.447	1.316	1.248	nucleus	GO:0000003 reproduction; GO:0003006 developmental process involved in reproduction; GO:0007275 multicellular organism development; GO:0009791 post-embryonic development; GO:0009838 abscission; GO:0009908 flower development; GO:0010227 floral organ abscission; GO:0022414 reproductive process; GO:0032501 multicellular organismal process; GO:0032502 developmental process; GO:0048367 shoot system dev…	GO:0005622 intracellular; GO:0005623 cell; GO:0005737 cytoplasm; GO:0005829 cytosol; GO:0044424 intracellular part; GO:0044444 cytoplasmic part; GO:0044464 cell part;
TRINITY_DN33121_c0_g1	late embryogenesis abundant protein D-34	3.755	Up	0.0162957	---	22.391	0.732	0.607	0.314	1.292	2.3	2.615	0.803	0.521	0.328	0.589	0.529	0.949	mitochondria	GO:0006873 cellular ion homeostasis; GO:0007275 multicellular organism development; GO:0009791 post-embryonic development; GO:0009845 seed germination; GO:0009987 cellular process; GO:0010035 response to inorganic substance; GO:0010038 response to metal ion; GO:0010226 response to lithium ion; GO:0019725 cellular homeostasis; GO:0032501 multicellular organismal process; GO:0032502 developmental p…	GO:0005622 intracellular; GO:0005623 cell; GO:0005634 nucleus; GO:0005730 nucleolus; GO:0005737 cytoplasm; GO:0005829 cytosol; GO:0031974 membrane-enclosed lumen; GO:0031981 nuclear lumen; GO:0043226 organelle; GO:0043227 membrane-bounded organelle; GO:0043228 non-membrane-bounded organelle; GO:0043229 intracellular organelle; GO:0043231 intracellular membrane-bounded organelle; GO:0043232 intrac…
TRINITY_DN26518_c0_g1	late embryogenesis abundant protein D-34	1.604	Up	0.0031615	---	26.642	0.857	0.813	0.826	1.163	1.35	1.49	0.844	0.735	0.747	1.201	1.075	1.005	cytoplasm	GO:0006873 cellular ion homeostasis; GO:0007275 multicellular organism development; GO:0009791 post-embryonic development; GO:0009845 seed germination; GO:0009987 cellular process; GO:0010035 response to inorganic substance; GO:0010038 response to metal ion; GO:0010226 response to lithium ion; GO:0019725 cellular homeostasis; GO:0032501 multicellular organismal process; GO:0032502 developmental p…	GO:0005622 intracellular; GO:0005623 cell; GO:0005634 nucleus; GO:0005730 nucleolus; GO:0005737 cytoplasm; GO:0005829 cytosol; GO:0031974 membrane-enclosed lumen; GO:0031981 nuclear lumen; GO:0043226 organelle; GO:0043227 membrane-bounded organelle; GO:0043228 non-membrane-bounded organelle; GO:0043229 intracellular organelle; GO:0043231 intracellular membrane-bounded organelle; GO:0043232 intrac…
TRINITY_DN37721_c0_g1	late embryogenesis abundant protein D-34	4.016	Up	3.2749e-06	---	13.986	0.405	0.363	0.389	1.526	1.477	1.644	0.651	0.415	0.501	1.442	1.847	1.632	nucleus
TRINITY_DN41361_c0_g1	oleosin	2.253	Up	0.0021584	---	17.066	0.509	0.617	0.449	1.052	1.339	1.157	0.928	0.778	1.057	1.648	1.392	1.442	chloroplast
TRINITY_DN24008_c0_g1	hypothetical protein MTR_2g105710	1.543	Up	0.0115806	---	18.139	0.618	0.593	0.797	1.091	0.959	1.049	0.819	0.762	0.837	1.592	1.817	1.404	nucleus							PF00067	Cytochrome P450
TRINITY_DN53983_c0_g1	cysteine proteinase inhibitor 5	1.56	Up	0.0170798	---	13.686	0.949	0.866	0.865	1.192	1.694	1.295	1	0.764	0.945	0.936	0.769	0.949	mitochondria	GO:0006950 response to stress; GO:0009266 response to temperature stimulus; GO:0009408 response to heat; GO:0009628 response to abiotic stimulus; GO:0009892 negative regulation of metabolic process; GO:0009987 cellular process; GO:0010029 regulation of seed germination; GO:0010030 positive regulation of seed germination; GO:0010466 negative regulation of peptidase activity; GO:0010605 negative re…	GO:0005618 cell wall; GO:0005623 cell; GO:0030312 external encapsulating structure; GO:0044464 cell part; GO:0071944 cell periphery;	GO:0002020 protease binding; GO:0004857 enzyme inhibitor activity; GO:0004866 endopeptidase inhibitor activity; GO:0004869 cysteine-type endopeptidase inhibitor activity; GO:0005488 binding; GO:0005515 protein binding; GO:0019899 enzyme binding; GO:0030234 enzyme regulator activity; GO:0030414 peptidase inhibitor activity; GO:0061134 peptidase regulator activity; GO:0061135 endopeptidase regulato…
TRINITY_DN16132_c0_g1	1-aminocyclopropane-1-carboxylate oxidase homolog 1	1.54	Up	0.033122	---	41.889	1.095	0.862	1.071	1.451	1.896	1.316	0.749	0.665	0.751	0.787	0.684	0.92	cytoplasm							PF03171	2OG-Fe(II) oxygenase superfamily
TRINITY_DN46403_c0_g1	uncharacterized protein LOC101501386	1.502	Up	0.0160245	---	15.012	0.798	0.808	0.795	1.125	1.154	1.328	0.946	0.948	0.674	1.186	1.22	1.293	nucleus
TRINITY_DN42593_c0_g1	oleosin 1	2.161	Up	0.00177854	---	15.709	0.634	0.659	0.512	1.246	1.478	1.176	0.689	0.762	1.085	1.262	1.289	1.352	vacuolar membrane	GO:0000003 reproduction; GO:0003006 developmental process involved in reproduction; GO:0006950 response to stress; GO:0007275 multicellular organism development; GO:0009266 response to temperature stimulus; GO:0009409 response to cold; GO:0009628 response to abiotic stimulus; GO:0009791 post-embryonic development; GO:0009845 seed germination; GO:0010154 fruit development; GO:0010344 seed oilbody …	GO:0005576 extracellular region; GO:0005622 intracellular; GO:0005623 cell; GO:0005811 lipid particle; GO:0016020 membrane; GO:0043226 organelle; GO:0043228 non-membrane-bounded organelle; GO:0043229 intracellular organelle; GO:0043232 intracellular non-membrane-bounded organelle; GO:0044424 intracellular part; GO:0044464 cell part;
TRINITY_DN4478_c0_g1	RecName: Full=Seed biotin-containing protein SBP65; AltName: Full=Seed biotinylated protein of 65 kDa	2.543	Up	0.0073038	---	56.886	0.487	0.508	0.498	1.109	1.234	1.454	0.835	0.692	0.639	1.601	1.724	1.562	cytoplasm,nucleus
TRINITY_DN34157_c0_g1	membrane protein PM19L	2.756	Up	0.000160069	---	19.047	0.458	0.551	0.46	1.385	1.422	1.242	0.605	0.677	0.756	1.493	1.476	1.605	plasma membrane
TRINITY_DN25570_c0_g1	putative Seed maturation protein	2.174	Up	0.00089846	---	26.159	0.597	0.529	0.526	1.127	1.08	1.385	0.951	0.61	0.693	1.413	1.855	1.537	chloroplast	GO:0006873 cellular ion homeostasis; GO:0007275 multicellular organism development; GO:0009791 post-embryonic development; GO:0009845 seed germination; GO:0009987 cellular process; GO:0010035 response to inorganic substance; GO:0010038 response to metal ion; GO:0010226 response to lithium ion; GO:0019725 cellular homeostasis; GO:0032501 multicellular organismal process; GO:0032502 developmental p…	GO:0005622 intracellular; GO:0005623 cell; GO:0005634 nucleus; GO:0005730 nucleolus; GO:0005737 cytoplasm; GO:0005829 cytosol; GO:0031974 membrane-enclosed lumen; GO:0031981 nuclear lumen; GO:0043226 organelle; GO:0043227 membrane-bounded organelle; GO:0043228 non-membrane-bounded organelle; GO:0043229 intracellular organelle; GO:0043231 intracellular membrane-bounded organelle; GO:0043232 intrac…
TRINITY_DN28788_c0_g1	putative Seed maturation protein	2.605	Up	0.00044037	---	22.142	0.479	0.524	0.483	1.162	1.193	1.516	0.765	0.686	0.575	1.683	1.729	1.541	nucleus
TRINITY_DN13844_c0_g1	putative Late embryogenesis abundant protein LEA	1.686	Up	0.038499	---	43.433	0.463	0.857	0.63	1.048	1.059	1.18	1.078	0.936	1.092	0.991	1.205	1.177	mitochondria	GO:0000003 reproduction; GO:0003006 developmental process involved in reproduction; GO:0007275 multicellular organism development; GO:0009791 post-embryonic development; GO:0009838 abscission; GO:0009908 flower development; GO:0010227 floral organ abscission; GO:0022414 reproductive process; GO:0032501 multicellular organismal process; GO:0032502 developmental process; GO:0048367 shoot system dev…	GO:0005622 intracellular; GO:0005623 cell; GO:0005737 cytoplasm; GO:0005829 cytosol; GO:0044424 intracellular part; GO:0044444 cytoplasmic part; GO:0044464 cell part;
TRINITY_DN18803_c0_g1	seipin-1	1.878	Up	0.00039794	---	19.467	0.845	0.784	0.731	1.402	1.436	1.595	0.845	0.903	0.783	1.017	0.962	0.989	mitochondria	GO:0000003 reproduction; GO:0003006 developmental process involved in reproduction; GO:0006996 organelle organization; GO:0007275 multicellular organism development; GO:0009791 post-embryonic development; GO:0009846 pollen germination; GO:0009856 pollination; GO:0009987 cellular process; GO:0010154 fruit development; GO:0010162 seed dormancy process; GO:0010344 seed oilbody biogenesis; GO:0010431…	GO:0005622 intracellular; GO:0005623 cell; GO:0005737 cytoplasm; GO:0005783 endoplasmic reticulum; GO:0012505 endomembrane system; GO:0043226 organelle; GO:0043227 membrane-bounded organelle; GO:0043229 intracellular organelle; GO:0043231 intracellular membrane-bounded organelle; GO:0044424 intracellular part; GO:0044444 cytoplasmic part; GO:0044464 cell part;		K19365	BSCL2; seipin
TRINITY_DN36137_c0_g1	translocator protein homolog	1.621	Up	0.0187957	---	22.881	0.625	0.502	0.752	1.021	1.108	0.916	1.215	0.851	1.082	1.236	1.671	1.317	plasma membrane	GO:0001101 response to acid chemical; GO:0006725 cellular aromatic compound metabolic process; GO:0006778 porphyrin-containing compound metabolic process; GO:0006807 nitrogen compound metabolic process; GO:0006950 response to stress; GO:0006970 response to osmotic stress; GO:0008152 metabolic process; GO:0009628 response to abiotic stimulus; GO:0009651 response to salt stress; GO:0009719 response…	GO:0000139 Golgi membrane; GO:0005622 intracellular; GO:0005623 cell; GO:0005737 cytoplasm; GO:0005783 endoplasmic reticulum; GO:0005789 endoplasmic reticulum membrane; GO:0005794 Golgi apparatus; GO:0005795 Golgi stack; GO:0009507 chloroplast; GO:0009526 plastid envelope; GO:0009536 plastid; GO:0009941 chloroplast envelope; GO:0012505 endomembrane system; GO:0016020 membrane; GO:0031090 organell…	GO:0005488 binding; GO:0020037 heme binding; GO:0046906 tetrapyrrole binding; GO:0048037 cofactor binding; GO:0097159 organic cyclic compound binding; GO:1901363 heterocyclic compound binding;	K05770	TSPO, BZRP; translocator protein
TRINITY_DN9106_c0_g1	heat shock protein 70 kDa	1.55	Up	0.0131182	---	56.178	0.726		0.664	1.051		1.103	0.983		1.092	1.338		1.227	cytoplasm				K03283	HSPA1s; heat shock 70kDa protein 1/2/6/8	map03040 Spliceosome; map04141 Protein processing in endoplasmic reticulum; map04144 Endocytosis
TRINITY_DN1554_c0_g1	hypothetical protein MtrunA17_Chr7g0253851	1.969	Up	0.00061533	---	80.385	0.634	0.566	0.709	1.311	1.244	1.204	1.156	0.796	0.934	1.094	1.451	1.208	cytoplasm
TRINITY_DN28156_c0_g1	hypothetical protein TSUD_368720	1.828	Up	0.025719	---	14.437	0.637	1.08	1.018	1.551	1.9	1.548	0.824	0.638	0.897	1.022	0.505	0.569	chloroplast
TRINITY_DN7430_c0_g1	cysteine proteinase precursor	1.597	Up	0.030944	---	55.587	0.835	0.972	0.62	1.377	1.129	1.371	1.073	0.794	0.798	0.812	1.176	1.267	chloroplast	GO:0006508 proteolysis; GO:0006624 vacuolar protein processing; GO:0006807 nitrogen compound metabolic process; GO:0006996 organelle organization; GO:0007033 vacuole organization; GO:0008152 metabolic process; GO:0009056 catabolic process; GO:0009057 macromolecule catabolic process; GO:0009987 cellular process; GO:0010467 gene expression; GO:0016043 cellular component organization; GO:0016485 pro…	GO:0000322 storage vacuole; GO:0000325 plant-type vacuole; GO:0000326 protein storage vacuole; GO:0005622 intracellular; GO:0005623 cell; GO:0005737 cytoplasm; GO:0005773 vacuole; GO:0043226 organelle; GO:0043227 membrane-bounded organelle; GO:0043229 intracellular organelle; GO:0043231 intracellular membrane-bounded organelle; GO:0044424 intracellular part; GO:0044444 cytoplasmic part; GO:004446…	GO:0003824 catalytic activity; GO:0004175 endopeptidase activity; GO:0004197 cysteine-type endopeptidase activity; GO:0008233 peptidase activity; GO:0008234 cysteine-type peptidase activity; GO:0016787 hydrolase activity; GO:0070011 peptidase activity, acting on L-amino acid peptides;	K01369	LGMN; legumain [EC:3.4.22.34]
TRINITY_DN12449_c0_g1	lipoyl synthase, chloroplastic	2.03	Up	0.0105038	---	41.263	0.753	0.691		1.552	1.379		1.332	0.712		0.469	1.342		nucleus	GO:0006082 organic acid metabolic process; GO:0006464 cellular protein modification process; GO:0006629 lipid metabolic process; GO:0006631 fatty acid metabolic process; GO:0006633 fatty acid biosynthetic process; GO:0006732 coenzyme metabolic process; GO:0006790 sulfur compound metabolic process; GO:0006807 nitrogen compound metabolic process; GO:0008152 metabolic process; GO:0008610 lipid biosy…	GO:0005622 intracellular; GO:0005623 cell; GO:0005737 cytoplasm; GO:0009507 chloroplast; GO:0009536 plastid; GO:0043226 organelle; GO:0043227 membrane-bounded organelle; GO:0043229 intracellular organelle; GO:0043231 intracellular membrane-bounded organelle; GO:0044424 intracellular part; GO:0044444 cytoplasmic part; GO:0044464 cell part;	GO:0003824 catalytic activity; GO:0016740 transferase activity; GO:0016782 transferase activity, transferring sulfur-containing groups; GO:0016783 sulfurtransferase activity; GO:0016992 lipoate synthase activity; GO:0070283 radical SAM enzyme activity;	K03644	lipA, LIAS, LIP1, LIP5; lipoyl synthase [EC:2.8.1.8]	map00785 Lipoic acid metabolism; map01100 Metabolic pathways	PF04055	Radical SAM superfamily
TRINITY_DN25762_c0_g1	hypothetical protein TSUD_206770	1.665	Up	0.0028421	---	25.455	0.675	0.817	0.725	1.164	1.369	1.159	1.019	0.823	0.991	1.213	1.076	1.185	chloroplast		GO:0005622 intracellular; GO:0005623 cell; GO:0005737 cytoplasm; GO:0005829 cytosol; GO:0044424 intracellular part; GO:0044444 cytoplasmic part; GO:0044464 cell part;		K20896	TENA_E; formylaminopyrimidine deformylase / aminopyrimidine aminohydrolase [EC:3.5.1.- 3.5.99.-]	map00730 Thiamine metabolism; map01100 Metabolic pathways
TRINITY_DN20223_c0_g1	late embryogenesis abundant protein D-34	2.058	Up	0.023255	---	29.434	0.865	0.676	0.906	1.242	2.247	1.546	1.025	0.739	0.688	0.946	0.463	0.578	chloroplast	GO:0006873 cellular ion homeostasis; GO:0007275 multicellular organism development; GO:0009791 post-embryonic development; GO:0009845 seed germination; GO:0009987 cellular process; GO:0010035 response to inorganic substance; GO:0010038 response to metal ion; GO:0010226 response to lithium ion; GO:0019725 cellular homeostasis; GO:0032501 multicellular organismal process; GO:0032502 developmental p…	GO:0005622 intracellular; GO:0005623 cell; GO:0005634 nucleus; GO:0005730 nucleolus; GO:0005737 cytoplasm; GO:0005829 cytosol; GO:0031974 membrane-enclosed lumen; GO:0031981 nuclear lumen; GO:0043226 organelle; GO:0043227 membrane-bounded organelle; GO:0043228 non-membrane-bounded organelle; GO:0043229 intracellular organelle; GO:0043231 intracellular membrane-bounded organelle; GO:0043232 intrac…
TRINITY_DN5559_c0_g1	hypothetical protein TSUD_202980	1.57	Up	0.0025159	---	55.457	0.852	0.932	0.879	1.568	1.298	1.315	1.002	1.007	0.855	0.682	0.811	0.932	chloroplast	GO:0006508 proteolysis; GO:0006807 nitrogen compound metabolic process; GO:0006950 response to stress; GO:0006970 response to osmotic stress; GO:0008152 metabolic process; GO:0009056 catabolic process; GO:0009057 macromolecule catabolic process; GO:0009628 response to abiotic stimulus; GO:0009651 response to salt stress; GO:0009719 response to endogenous stimulus; GO:0009725 response to hormone; …	GO:0005622 intracellular; GO:0005623 cell; GO:0005737 cytoplasm; GO:0005773 vacuole; GO:0005829 cytosol; GO:0005911 cell-cell junction; GO:0009506 plasmodesma; GO:0030054 cell junction; GO:0043226 organelle; GO:0043227 membrane-bounded organelle; GO:0043229 intracellular organelle; GO:0043231 intracellular membrane-bounded organelle; GO:0044424 intracellular part; GO:0044444 cytoplasmic part; GO:…	GO:0003824 catalytic activity; GO:0004175 endopeptidase activity; GO:0004190 aspartic-type endopeptidase activity; GO:0008233 peptidase activity; GO:0016787 hydrolase activity; GO:0070001 aspartic-type peptidase activity; GO:0070011 peptidase activity, acting on L-amino acid peptides;	K08245	E3.4.23.40; phytepsin [EC:3.4.23.40]		PF05184	Saposin-like type B, region 1
TRINITY_DN10254_c0_g1	serine carboxypeptidase-like 34	1.802	Up	0.0050196	---	30.255	0.915	0.95	0.739	1.731	1.601	1.361	0.873	0.701	0.823	0.631	0.811	1.173	extracellular	GO:0006508 proteolysis; GO:0006807 nitrogen compound metabolic process; GO:0008152 metabolic process; GO:0009056 catabolic process; GO:0009057 macromolecule catabolic process; GO:0009987 cellular process; GO:0019538 protein metabolic process; GO:0030163 protein catabolic process; GO:0043170 macromolecule metabolic process; GO:0044237 cellular metabolic process; GO:0044238 primary metabolic proces…	GO:0005618 cell wall; GO:0005622 intracellular; GO:0005623 cell; GO:0005737 cytoplasm; GO:0005773 vacuole; GO:0009505 plant-type cell wall; GO:0030312 external encapsulating structure; GO:0043226 organelle; GO:0043227 membrane-bounded organelle; GO:0043229 intracellular organelle; GO:0043231 intracellular membrane-bounded organelle; GO:0044424 intracellular part; GO:0044444 cytoplasmic part; GO:0…	GO:0003824 catalytic activity; GO:0004180 carboxypeptidase activity; GO:0004185 serine-type carboxypeptidase activity; GO:0008233 peptidase activity; GO:0008236 serine-type peptidase activity; GO:0008238 exopeptidase activity; GO:0016787 hydrolase activity; GO:0017171 serine hydrolase activity; GO:0070008 serine-type exopeptidase activity; GO:0070011 peptidase activity, acting on L-amino acid pep…	K16297	SCPL-II; serine carboxypeptidase-like clade II [EC:3.4.16.-]		PF00450	Serine carboxypeptidase
TRINITY_DN22782_c0_g1	phosphatase 2C family protein	2.09	Up	3.9535e-05	---	34.85	0.662	0.647	0.648	1.463	1.331	1.297	0.813	0.815	0.904	1.232	1.201	1.264	chloroplast				K14803	PTC2_3; protein phosphatase PTC2/3 [EC:3.1.3.16]
TRINITY_DN18198_c0_g1	putative plasma membrane intrinsic protein	1.553	Up	0.019519	---	30.517	0.739	0.968	0.776	1.463	1.291	1.102	0.935	0.939	0.973	0.965	0.843	1.183	plasma membrane				K09872	PIP; aquaporin PIP
TRINITY_DN41876_c0_g1	protein SLE2	4.387	Up	0.000181373	---	10.596	0.398	0.41	0.357	1.409	1.697	2.005	0.457	0.312	0.404	1.818	1.742	1.448	nucleus	GO:0000003 reproduction; GO:0001101 response to acid chemical; GO:0003006 developmental process involved in reproduction; GO:0007275 multicellular organism development; GO:0009719 response to endogenous stimulus; GO:0009725 response to hormone; GO:0009737 response to abscisic acid; GO:0009791 post-embryonic development; GO:0010033 response to organic substance; GO:0010154 fruit development; GO:00…	GO:0005622 intracellular; GO:0005623 cell; GO:0005737 cytoplasm; GO:0005829 cytosol; GO:0044424 intracellular part; GO:0044444 cytoplasmic part; GO:0044464 cell part;	GO:0003676 nucleic acid binding; GO:0003677 DNA binding; GO:0005488 binding; GO:0097159 organic cyclic compound binding; GO:1901363 heterocyclic compound binding;
TRINITY_DN35629_c0_g1	protein FATTY ACID EXPORT 2, chloroplastic	1.576	Up	0.027122	---	13.474	0.581	0.564	0.647	1.178	0.862	0.785	1.241	1.359	1.145	1.058	1.268	1.513	chloroplast		GO:0005622 intracellular; GO:0005623 cell; GO:0005737 cytoplasm; GO:0005739 mitochondrion; GO:0009507 chloroplast; GO:0009526 plastid envelope; GO:0009536 plastid; GO:0009941 chloroplast envelope; GO:0031967 organelle envelope; GO:0031975 envelope; GO:0043226 organelle; GO:0043227 membrane-bounded organelle; GO:0043229 intracellular organelle; GO:0043231 intracellular membrane-bounded organelle; …
TRINITY_DN6328_c0_g1	RecName: Full=Beta-amylase; AltName: Full=1,4-alpha-D-glucan maltohydrolase	1.812	Up	0.0052414	---	31.318	0.786	0.994	0.697	1.561	1.528	1.4	0.898	0.783	0.534	0.877	0.899	1.501	extracellular	GO:0000272 polysaccharide catabolic process; GO:0005975 carbohydrate metabolic process; GO:0005976 polysaccharide metabolic process; GO:0005982 starch metabolic process; GO:0005983 starch catabolic process; GO:0006073 cellular glucan metabolic process; GO:0008152 metabolic process; GO:0009056 catabolic process; GO:0009057 macromolecule catabolic process; GO:0009251 glucan catabolic process; GO:00…	GO:0005622 intracellular; GO:0005623 cell; GO:0005737 cytoplasm; GO:0005829 cytosol; GO:0044424 intracellular part; GO:0044444 cytoplasmic part; GO:0044464 cell part;	GO:0003824 catalytic activity; GO:0004553 hydrolase activity, hydrolyzing O-glycosyl compounds; GO:0016160 amylase activity; GO:0016161 beta-amylase activity; GO:0016787 hydrolase activity; GO:0016798 hydrolase activity, acting on glycosyl bonds;	K01177	E3.2.1.2; beta-amylase [EC:3.2.1.2]	map00500 Starch and sucrose metabolism; map01100 Metabolic pathways	PF01373	Glycosyl hydrolase family 14
TRINITY_DN52122_c0_g1	seed maturation protein	2.528	Up	0.0027765	---	13.964	0.467	0.453		1.109	1.217		0.763	0.782		1.675	1.698		nucleus	GO:0000003 reproduction; GO:0001101 response to acid chemical; GO:0003006 developmental process involved in reproduction; GO:0006950 response to stress; GO:0006970 response to osmotic stress; GO:0007275 multicellular organism development; GO:0009414 response to water deprivation; GO:0009415 response to water; GO:0009628 response to abiotic stimulus; GO:0009791 post-embryonic development; GO:00100…	GO:0005622 intracellular; GO:0005623 cell; GO:0005737 cytoplasm; GO:0005829 cytosol; GO:0005911 cell-cell junction; GO:0009506 plasmodesma; GO:0030054 cell junction; GO:0044424 intracellular part; GO:0044444 cytoplasmic part; GO:0044464 cell part; GO:0055044 symplast;
TRINITY_DN25575_c0_g1	aquaporin pip2-1-like protein	1.596	Up	0.0067448	---	30.871	0.903	0.853	0.753	1.347	1.494	1.163	0.99	0.703	1.039	0.897	1.058	1.119	plasma membrane	GO:0001101 response to acid chemical; GO:0006810 transport; GO:0006811 ion transport; GO:0006833 water transport; GO:0006950 response to stress; GO:0009414 response to water deprivation; GO:0009415 response to water; GO:0009628 response to abiotic stimulus; GO:0009719 response to endogenous stimulus; GO:0009725 response to hormone; GO:0009737 response to abscisic acid; GO:0010033 response to orga…	GO:0005622 intracellular; GO:0005623 cell; GO:0005737 cytoplasm; GO:0005886 plasma membrane; GO:0005887 integral component of plasma membrane; GO:0005911 cell-cell junction; GO:0009506 plasmodesma; GO:0009507 chloroplast; GO:0009536 plastid; GO:0016020 membrane; GO:0016021 integral component of membrane; GO:0030054 cell junction; GO:0031224 intrinsic component of membrane; GO:0031226 intrinsic co…	GO:0003676 nucleic acid binding; GO:0003723 RNA binding; GO:0003729 mRNA binding; GO:0005215 transporter activity; GO:0005372 water transmembrane transporter activity; GO:0005488 binding; GO:0015250 water channel activity; GO:0015267 channel activity; GO:0015318 inorganic solute uptake transmembrane transporter activity; GO:0022803 passive transmembrane transporter activity; GO:0022838 substrate-…	K09872	PIP; aquaporin PIP
TRINITY_DN695_c0_g1	uncharacterized protein LOC25502128	1.603	Up	0.000100663	---	95.687	0.745	0.723	0.692	1.106	1.169	1.188	0.978	0.996	0.992	1.228	1.201	1.227	chloroplast	GO:0006605 protein targeting; GO:0006626 protein targeting to mitochondrion; GO:0006810 transport; GO:0006839 mitochondrial transport; GO:0006886 intracellular protein transport; GO:0006996 organelle organization; GO:0007005 mitochondrion organization; GO:0008104 protein localization; GO:0009987 cellular process; GO:0015031 protein transport; GO:0015833 peptide transport; GO:0016043 cellular comp…	GO:0005622 intracellular; GO:0005623 cell; GO:0005634 nucleus; GO:0005737 cytoplasm; GO:0005739 mitochondrion; GO:0005740 mitochondrial envelope; GO:0005741 mitochondrial outer membrane; GO:0016020 membrane; GO:0019867 outer membrane; GO:0031090 organelle membrane; GO:0031966 mitochondrial membrane; GO:0031967 organelle envelope; GO:0031968 organelle outer membrane; GO:0031975 envelope; GO:004322…	GO:0000166 nucleotide binding; GO:0003824 catalytic activity; GO:0005488 binding; GO:0005524 ATP binding; GO:0008144 drug binding; GO:0016462 pyrophosphatase activity; GO:0016787 hydrolase activity; GO:0016817 hydrolase activity, acting on acid anhydrides; GO:0016818 hydrolase activity, acting on acid anhydrides, in phosphorus-containing anhydrides; GO:0016887 ATPase activity; GO:0017076 purine n…				PF00004	ATPase family associated with various cellular activities (AAA)
TRINITY_DN17481_c0_g1	dehydrin 2	1.618	Up	0.00020081	---	34.068	0.669	0.703	0.688	1.037	1.148	1.149	1.023	0.898	0.905	1.253	1.305	1.378	peroxisome
TRINITY_DN44372_c0_g1	universal stress protein PHOS32	3.357	Up	0.00031913	---	17.396	0.415	0.362	0.444	1.144	1.484	1.471	1.168	0.416	0.652	1.511	1.951	1.601	nucleus		GO:0005623 cell; GO:0005886 plasma membrane; GO:0016020 membrane; GO:0044464 cell part; GO:0071944 cell periphery;	GO:0000166 nucleotide binding; GO:0005488 binding; GO:0008144 drug binding; GO:0016208 AMP binding; GO:0017076 purine nucleotide binding; GO:0030554 adenyl nucleotide binding; GO:0032553 ribonucleotide binding; GO:0032555 purine ribonucleotide binding; GO:0032559 adenyl ribonucleotide binding; GO:0036094 small molecule binding; GO:0043167 ion binding; GO:0043168 anion binding; GO:0043169 cation b…				PF00582	Universal stress protein family
TRINITY_DN36741_c0_g1	uncharacterized protein LOC101500782	1.929	Up	0.0125374	---	19.349	1.083	0.829	0.981	1.417	2.089	2.076	0.831	0.668	0.457	0.625	0.526	0.547	chloroplast				K21894	CYGB; cytoglobin		PF00042	Globin
TRINITY_DN12376_c0_g1	hypothetical protein MtrunA17_Chr6g0471181	1.851	Up	8.3721e-05	---	41.36	0.704	0.636	0.677	1.214	1.214	1.306	0.886	0.828	0.816	1.283	1.443	1.304	nucleus	GO:0000302 response to reactive oxygen species; GO:0001101 response to acid chemical; GO:0006950 response to stress; GO:0006970 response to osmotic stress; GO:0006972 hyperosmotic response; GO:0006979 response to oxidative stress; GO:0007154 cell communication; GO:0007165 signal transduction; GO:0007275 multicellular organism development; GO:0007568 aging; GO:0007623 circadian rhythm; GO:0009266 …	GO:0005622 intracellular; GO:0005623 cell; GO:0005737 cytoplasm; GO:0044424 intracellular part; GO:0044464 cell part;		K23450	HRC; sarcoplasmic reticulum histidine-rich calcium-binding protein
TRINITY_DN27620_c0_g1	60S ribosomal protein L15-1	0.609	Down	0.0114366	---	24.217	1.639	1.25	1.169	0.884	0.78	0.807	0.872	1.433	1.074	0.583	0.562	0.947	nucleus				K02877	RP-L15e, RPL15; large subunit ribosomal protein L15e	map03010 Ribosome
TRINITY_DN8983_c0_g1	apyrase S-type	0.202	Down	0.00042452	---	50.252		2.13	2.009		0.412	0.425		0.895	1.039		0.386	0.374	chloroplast	GO:0000003 reproduction; GO:0009846 pollen germination; GO:0009856 pollination; GO:0022414 reproductive process; GO:0032501 multicellular organismal process; GO:0044706 multi-multicellular organism process; GO:0051704 multi-organism process;	GO:0005622 intracellular; GO:0005623 cell; GO:0005737 cytoplasm; GO:0005768 endosome; GO:0005794 Golgi apparatus; GO:0005802 trans-Golgi network; GO:0012505 endomembrane system; GO:0016020 membrane; GO:0016021 integral component of membrane; GO:0031224 intrinsic component of membrane; GO:0031410 cytoplasmic vesicle; GO:0031982 vesicle; GO:0031984 organelle subcompartment; GO:0043226 organelle; GO…	GO:0003824 catalytic activity; GO:0004382 guanosine-diphosphatase activity; GO:0016462 pyrophosphatase activity; GO:0016787 hydrolase activity; GO:0016817 hydrolase activity, acting on acid anhydrides; GO:0016818 hydrolase activity, acting on acid anhydrides, in phosphorus-containing anhydrides; GO:0017110 nucleoside-diphosphatase activity; GO:0045134 uridine-diphosphatase activity;	K14641	APY1_2; apyrase [EC:3.6.1.5]	map00230 Purine metabolism; map00240 Pyrimidine metabolism; map01100 Metabolic pathways
TRINITY_DN28304_c0_g1	osmotin-like protein OSM34	0.606	Down	0.0050244	---	12.384	1.306	1.206	1.498	0.747	0.915	0.769	1.063	0.999	0.788	0.819	0.875	0.909	chloroplast		GO:0005576 extracellular region;					PF00314	Thaumatin family
TRINITY_DN3138_c0_g1	probable Xaa-Pro aminopeptidase P	0.625	Down	0.0031809	---	71.195	1.259	1.305	1.374	0.92	0.821	0.721	1.077	1.139	1.012	0.798	0.72	0.809	chloroplast	GO:0006508 proteolysis; GO:0006807 nitrogen compound metabolic process; GO:0006810 transport; GO:0008152 metabolic process; GO:0009914 hormone transport; GO:0009926 auxin polar transport; GO:0010817 regulation of hormone levels; GO:0019538 protein metabolic process; GO:0043170 macromolecule metabolic process; GO:0044238 primary metabolic process; GO:0051179 localization; GO:0051234 establishment …	GO:0005622 intracellular; GO:0005623 cell; GO:0005737 cytoplasm; GO:0005829 cytosol; GO:0005886 plasma membrane; GO:0016020 membrane; GO:0044424 intracellular part; GO:0044444 cytoplasmic part; GO:0044464 cell part; GO:0071944 cell periphery;	GO:0003824 catalytic activity; GO:0004177 aminopeptidase activity; GO:0005488 binding; GO:0008144 drug binding; GO:0008233 peptidase activity; GO:0008238 exopeptidase activity; GO:0008270 zinc ion binding; GO:0010013 N-1-naphthylphthalamic acid binding; GO:0016787 hydrolase activity; GO:0030145 manganese ion binding; GO:0031406 carboxylic acid binding; GO:0033218 amide binding; GO:0033293 monocar…	K01262	pepP; Xaa-Pro aminopeptidase [EC:3.4.11.9]		PF01321; PF00557	Creatinase/Prolidase N-terminal domain; Metallopeptidase family M24
TRINITY_DN37622_c0_g1	hypothetical protein TSUD_401370	0.506	Down	0.0144008	---	16.543	1.6	1.294	1.322	0.672	0.922	0.54	1.329	1.204	1.18	0.351	0.547	0.918	chloroplast	GO:0006950 response to stress; GO:0006952 defense response; GO:0006970 response to osmotic stress; GO:0008152 metabolic process; GO:0009605 response to external stimulus; GO:0009607 response to biotic stimulus; GO:0009617 response to bacterium; GO:0009628 response to abiotic stimulus; GO:0009651 response to salt stress; GO:0009719 response to endogenous stimulus; GO:0009725 response to hormone; G…	GO:0005622 intracellular; GO:0005623 cell; GO:0005737 cytoplasm; GO:0005829 cytosol; GO:0005886 plasma membrane; GO:0009507 chloroplast; GO:0009532 plastid stroma; GO:0009536 plastid; GO:0009570 chloroplast stroma; GO:0016020 membrane; GO:0043226 organelle; GO:0043227 membrane-bounded organelle; GO:0043229 intracellular organelle; GO:0043231 intracellular membrane-bounded organelle; GO:0044422 or…	GO:0000166 nucleotide binding; GO:0003824 catalytic activity; GO:0005488 binding; GO:0010181 FMN binding; GO:0016491 oxidoreductase activity; GO:0016645 oxidoreductase activity, acting on the CH-NH group of donors; GO:0016646 oxidoreductase activity, acting on the CH-NH group of donors, NAD or NADP as acceptor; GO:0032553 ribonucleotide binding; GO:0036094 small molecule binding; GO:0043167 ion b…	K19784	chrR, NQR; chromate reductase, NAD(P)H dehydrogenase (quinone)		PF03358	NADPH-dependent FMN reductase
TRINITY_DN21898_c0_g1	V-type proton ATPase subunit E isoform X2	0.383	Down	0.00171781	---	27.659	1.987	1.581	1.447	0.539	0.722	0.661	0.915	1.127	1.21	0.472	0.505	0.615	cytoplasm	GO:0000003 reproduction; GO:0003006 developmental process involved in reproduction; GO:0006810 transport; GO:0006811 ion transport; GO:0006812 cation transport; GO:0006950 response to stress; GO:0006952 defense response; GO:0006970 response to osmotic stress; GO:0006996 organelle organization; GO:0007030 Golgi organization; GO:0007275 multicellular organism development; GO:0009266 response to tem…	GO:0000325 plant-type vacuole; GO:0005622 intracellular; GO:0005623 cell; GO:0005737 cytoplasm; GO:0005773 vacuole; GO:0005774 vacuolar membrane; GO:0005794 Golgi apparatus; GO:0005829 cytosol; GO:0005840 ribosome; GO:0005844 polysome; GO:0009705 plant-type vacuole membrane; GO:0012505 endomembrane system; GO:0016020 membrane; GO:0022626 cytosolic ribosome; GO:0031090 organelle membrane; GO:00329…	GO:0003735 structural constituent of ribosome; GO:0003824 catalytic activity; GO:0005198 structural molecule activity; GO:0005215 transporter activity; GO:0008324 cation transmembrane transporter activity; GO:0015075 ion transmembrane transporter activity; GO:0015077 monovalent inorganic cation transmembrane transporter activity; GO:0015078 hydrogen ion transmembrane transporter activity; GO:0015…	K02150	ATPeV1E, ATP6E; V-type H+-transporting ATPase subunit E	map00190 Oxidative phosphorylation; map01100 Metabolic pathways; map04145 Phagosome
TRINITY_DN24147_c0_g1	UDP-glycosyltransferase 83A1	0.648	Down	0.0082973	---	40.376	1.244	1.391	1.559	0.856	1.019	0.842	1.115	0.732	0.754	0.8	0.876	0.8	nucleus		GO:0005622 intracellular; GO:0005623 cell; GO:0043226 organelle; GO:0043227 membrane-bounded organelle; GO:0043229 intracellular organelle; GO:0043231 intracellular membrane-bounded organelle; GO:0044424 intracellular part; GO:0044464 cell part;	GO:0003824 catalytic activity; GO:0008194 UDP-glycosyltransferase activity; GO:0016740 transferase activity; GO:0016757 transferase activity, transferring glycosyl groups; GO:0016758 transferase activity, transferring hexosyl groups; GO:0035251 UDP-glucosyltransferase activity; GO:0046527 glucosyltransferase activity; GO:0080043 quercetin 3-O-glucosyltransferase activity; GO:0080044 quercetin 7-O…
TRINITY_DN4231_c0_g1	pectinesterase-like	0.277	Down	0.0034446	---	60.533	1.882	1.803		0.473	0.547		1.132	1.121		0.426	0.433		endoplasmic reticulum	GO:0009605 response to external stimulus; GO:0009607 response to biotic stimulus; GO:0009617 response to bacterium; GO:0043086 negative regulation of catalytic activity; GO:0043207 response to external biotic stimulus; GO:0044092 negative regulation of molecular function; GO:0050790 regulation of catalytic activity; GO:0050896 response to stimulus; GO:0051704 multi-organism process; GO:0051707 re…	GO:0005618 cell wall; GO:0005622 intracellular; GO:0005623 cell; GO:0005737 cytoplasm; GO:0005773 vacuole; GO:0005774 vacuolar membrane; GO:0005829 cytosol; GO:0016020 membrane; GO:0030312 external encapsulating structure; GO:0031090 organelle membrane; GO:0043226 organelle; GO:0043227 membrane-bounded organelle; GO:0043229 intracellular organelle; GO:0043231 intracellular membrane-bounded organe…	GO:0003824 catalytic activity; GO:0004857 enzyme inhibitor activity; GO:0016787 hydrolase activity; GO:0016788 hydrolase activity, acting on ester bonds; GO:0030234 enzyme regulator activity; GO:0030599 pectinesterase activity; GO:0046910 pectinesterase inhibitor activity; GO:0052689 carboxylic ester hydrolase activity; GO:0098772 molecular function regulator;	K01051	E3.1.1.11; pectinesterase [EC:3.1.1.11]	map00040 Pentose and glucuronate interconversions; map01100 Metabolic pathways	PF04043	Plant invertase/pectin methylesterase inhibitor
TRINITY_DN1899_c0_g1	D-3-phosphoglycerate dehydrogenase chloroplastic-like	0.453	Down	0.002075	---	65.868	1.762	1.452	1.465	0.638	0.843	0.639	0.997	1.152	1.27	0.547	0.504	0.549	chloroplast		GO:0005622 intracellular; GO:0005623 cell; GO:0005634 nucleus; GO:0005737 cytoplasm; GO:0005829 cytosol; GO:0009507 chloroplast; GO:0009532 plastid stroma; GO:0009536 plastid; GO:0009570 chloroplast stroma; GO:0043226 organelle; GO:0043227 membrane-bounded organelle; GO:0043229 intracellular organelle; GO:0043231 intracellular membrane-bounded organelle; GO:0044422 organelle part; GO:0044424 intr…		K00058	serA, PHGDH; D-3-phosphoglycerate dehydrogenase / 2-oxoglutarate reductase [EC:1.1.1.95 1.1.1.399]	map00260 Glycine, serine and threonine metabolism; map00270 Cysteine and methionine metabolism; map01100 Metabolic pathways; map01200 Carbon metabolism; map01230 Biosynthesis of amino acids	PF00389; PF02826; PF01842	D-isomer specific 2-hydroxyacid dehydrogenase, catalytic domain; D-isomer specific 2-hydroxyacid dehydrogenase, NAD binding domain; ACT domain
TRINITY_DN15409_c0_g1	RecName: Full=Endochitinase A2; Flags: Precursor	0.656	Down	0.00146384	---	34.671	1.297	1.193	1.311	0.888	0.844	0.761	1.026	1.214	1.01	0.821	0.712	0.863	extracellular	GO:0010035 response to inorganic substance; GO:0010038 response to metal ion; GO:0042221 response to chemical; GO:0046686 response to cadmium ion; GO:0050896 response to stimulus;	GO:0005622 intracellular; GO:0005623 cell; GO:0005737 cytoplasm; GO:0005773 vacuole; GO:0005774 vacuolar membrane; GO:0005829 cytosol; GO:0016020 membrane; GO:0031090 organelle membrane; GO:0043226 organelle; GO:0043227 membrane-bounded organelle; GO:0043229 intracellular organelle; GO:0043231 intracellular membrane-bounded organelle; GO:0044422 organelle part; GO:0044424 intracellular part; GO:0…		K20547	CHIB; basic endochitinase B [EC:3.2.1.14]	map00520 Amino sugar and nucleotide sugar metabolism; map01100 Metabolic pathways; map04016 MAPK signaling pathway - plant	PF00187; PF00182	Chitin recognition protein; Chitinase class I
TRINITY_DN3099_c0_g1	serine/threonine protein phosphatase 2A regulatory subunit A	0.628	Down	0.0089827	---	65.282	1.356	1.354	1.348	0.841	0.919	0.788	0.91	1.091	1.05	0.883	0.611	0.78	chloroplast				K03456	PPP2R1; serine/threonine-protein phosphatase 2A regulatory subunit A	map03015 mRNA surveillance pathway
TRINITY_DN15129_c0_g1	protein SRG1	0.596	Down	0.00079729	---	40.534	1.347	1.405	1.474	0.834	0.915	0.768	1.118	1.037	1.028	0.702	0.617	0.676	cytoplasm	GO:0007275 multicellular organism development; GO:0007568 aging; GO:0008152 metabolic process; GO:0010150 leaf senescence; GO:0032501 multicellular organismal process; GO:0032502 developmental process; GO:0048366 leaf development; GO:0048367 shoot system development; GO:0048731 system development; GO:0048827 phyllome development; GO:0048856 anatomical structure development; GO:0055114 oxidation-r…		GO:0003824 catalytic activity; GO:0016491 oxidoreductase activity; GO:0016679 oxidoreductase activity, acting on diphenols and related substances as donors; GO:0016682 oxidoreductase activity, acting on diphenols and related substances as donors, oxygen as acceptor;				PF03171	2OG-Fe(II) oxygenase superfamily
TRINITY_DN7645_c0_g1	omega-6 fatty acid desaturase, endoplasmic reticulum isozyme 2	0.47	Down	0.0076159	---	44.01	1.641	1.076	1.541	0.589	0.752	0.662	1.125	1.12	1.174	0.595	1.063	0.542	mitochondria	GO:0008152 metabolic process; GO:0055114 oxidation-reduction process;	GO:0005622 intracellular; GO:0005623 cell; GO:0005737 cytoplasm; GO:0005783 endoplasmic reticulum; GO:0005789 endoplasmic reticulum membrane; GO:0012505 endomembrane system; GO:0016020 membrane; GO:0031984 organelle subcompartment; GO:0042175 nuclear outer membrane-endoplasmic reticulum membrane network; GO:0043226 organelle; GO:0043227 membrane-bounded organelle; GO:0043229 intracellular organel…	GO:0003824 catalytic activity; GO:0016491 oxidoreductase activity; GO:0016705 oxidoreductase activity, acting on paired donors, with incorporation or reduction of molecular oxygen; GO:0045485 omega-6 fatty acid desaturase activity;	K10256	FAD2; omega-6 fatty acid desaturase / acyl-lipid omega-6 desaturase (Delta-12 desaturase) [EC:1.14.19.6 1.14.19.22]	map01040 Biosynthesis of unsaturated fatty acids; map01100 Metabolic pathways; map01212 Fatty acid metabolism	PF00487	Fatty acid desaturase
TRINITY_DN16966_c0_g1	1-aminocyclopropane-1-carboxylate oxidase 5	0.345	Down	0.0055385	---	34.93	1.66	1.353	1.483	0.555	0.653	0.344	1.091	1.276	1.721	0.592	0.439	0.304	cytoplasm	GO:0008152 metabolic process; GO:0009058 biosynthetic process; GO:0009692 ethylene metabolic process; GO:0009693 ethylene biosynthetic process; GO:0009987 cellular process; GO:0010817 regulation of hormone levels; GO:0042445 hormone metabolic process; GO:0042446 hormone biosynthetic process; GO:0043449 cellular alkene metabolic process; GO:0043450 alkene biosynthetic process; GO:0044237 cellular …		GO:0003824 catalytic activity; GO:0009815 1-aminocyclopropane-1-carboxylate oxidase activity; GO:0016491 oxidoreductase activity; GO:0016638 oxidoreductase activity, acting on the CH-NH2 group of donors; GO:0016641 oxidoreductase activity, acting on the CH-NH2 group of donors, oxygen as acceptor;	K05933	E1.14.17.4; aminocyclopropanecarboxylate oxidase [EC:1.14.17.4]	map00270 Cysteine and methionine metabolism; map01100 Metabolic pathways; map01110 Biosynthesis of secondary metabolites	PF03171	2OG-Fe(II) oxygenase superfamily
TRINITY_DN5502_c0_g1	cytochrome P450 family 71 protein	0.479	Down	0.0190424	---	57.876	1.283		1.246	0.668		0.544	1.253		1.458	0.791		0.698	chloroplast	GO:0001101 response to acid chemical; GO:0006629 lipid metabolic process; GO:0006720 isoprenoid metabolic process; GO:0006721 terpenoid metabolic process; GO:0008152 metabolic process; GO:0009058 biosynthetic process; GO:0009719 response to endogenous stimulus; GO:0009725 response to hormone; GO:0009753 response to jasmonic acid; GO:0009987 cellular process; GO:0010033 response to organic substan…	GO:0016020 membrane;	GO:0003824 catalytic activity; GO:0004497 monooxygenase activity; GO:0016491 oxidoreductase activity; GO:0016705 oxidoreductase activity, acting on paired donors, with incorporation or reduction of molecular oxygen; GO:0016709 oxidoreductase activity, acting on paired donors, with incorporation or reduction of molecular oxygen, NAD(P)H as one donor, and incorporation of one atom of oxygen; GO:003…				PF00067	Cytochrome P450
TRINITY_DN1791_c0_g1	transmembrane 9 superfamily member 4-like protein	0.599	Down	0.0057648	---	74.364	1.526	1.323	1.336	0.773	0.981	0.751	1.076	0.978	1.073	0.602	0.664	0.868	plasma membrane	GO:0032386 regulation of intracellular transport; GO:0032388 positive regulation of intracellular transport; GO:0032879 regulation of localization; GO:0032880 regulation of protein localization; GO:0033157 regulation of intracellular protein transport; GO:0048518 positive regulation of biological process; GO:0050789 regulation of biological process; GO:0051049 regulation of transport; GO:0051050 …	GO:0005622 intracellular; GO:0005623 cell; GO:0005737 cytoplasm; GO:0005768 endosome; GO:0005769 early endosome; GO:0005794 Golgi apparatus; GO:0005802 trans-Golgi network; GO:0012505 endomembrane system; GO:0016020 membrane; GO:0016021 integral component of membrane; GO:0031224 intrinsic component of membrane; GO:0031410 cytoplasmic vesicle; GO:0031982 vesicle; GO:0031984 organelle subcompartmen…		K17086	TM9SF2_4; transmembrane 9 superfamily member 2/4
TRINITY_DN1029_c0_g1	4-hydroxy-3-methylbut-2-en-1-yl diphosphate synthase chloroplastic-like	0.581	Down	0.014419	---	82.061	1.576	1.252	1.55	0.838	1.014	0.692	1.04	0.985	1.046	0.503	0.753	0.641	chloroplast	GO:0001101 response to acid chemical; GO:0002376 immune system process; GO:0006081 cellular aldehyde metabolic process; GO:0006082 organic acid metabolic process; GO:0006090 pyruvate metabolic process; GO:0006629 lipid metabolic process; GO:0006644 phospholipid metabolic process; GO:0006720 isoprenoid metabolic process; GO:0006793 phosphorus metabolic process; GO:0006796 phosphate-containing comp…	GO:0005622 intracellular; GO:0005623 cell; GO:0005737 cytoplasm; GO:0009507 chloroplast; GO:0009526 plastid envelope; GO:0009532 plastid stroma; GO:0009536 plastid; GO:0009570 chloroplast stroma; GO:0009941 chloroplast envelope; GO:0031967 organelle envelope; GO:0031975 envelope; GO:0043226 organelle; GO:0043227 membrane-bounded organelle; GO:0043229 intracellular organelle; GO:0043231 intracellu…	GO:0003824 catalytic activity; GO:0005488 binding; GO:0016491 oxidoreductase activity; GO:0016725 oxidoreductase activity, acting on CH or CH2 groups; GO:0046429 4-hydroxy-3-methylbut-2-en-1-yl diphosphate synthase activity; GO:0048037 cofactor binding; GO:0051536 iron-sulfur cluster binding; GO:0051539 4 iron, 4 sulfur cluster binding; GO:0051540 metal cluster binding; GO:0052592 oxidoreductase …	K03526	gcpE, ispG; (E)-4-hydroxy-3-methylbut-2-enyl-diphosphate synthase [EC:1.17.7.1 1.17.7.3]	map00900 Terpenoid backbone biosynthesis; map01100 Metabolic pathways; map01110 Biosynthesis of secondary metabolites
TRINITY_DN4612_c0_g1	protein disulfide isomerase-like 1-4-like	0.611	Down	0.0004047	---	48.615	1.358	1.249	1.234	0.831	0.778	0.739	1.068	1.221	1.095	0.76	0.653	0.926	chloroplast	GO:0006457 protein folding; GO:0006950 response to stress; GO:0006979 response to oxidative stress; GO:0009987 cellular process; GO:0033554 cellular response to stress; GO:0034976 response to endoplasmic reticulum stress; GO:0050896 response to stimulus; GO:0051716 cellular response to stimulus;	GO:0005622 intracellular; GO:0005623 cell; GO:0005737 cytoplasm; GO:0005739 mitochondrion; GO:0005773 vacuole; GO:0005774 vacuolar membrane; GO:0005783 endoplasmic reticulum; GO:0009507 chloroplast; GO:0009536 plastid; GO:0012505 endomembrane system; GO:0016020 membrane; GO:0031090 organelle membrane; GO:0043226 organelle; GO:0043227 membrane-bounded organelle; GO:0043229 intracellular organelle;…	GO:0003756 protein disulfide isomerase activity; GO:0003824 catalytic activity; GO:0016853 isomerase activity; GO:0016860 intramolecular oxidoreductase activity; GO:0016864 intramolecular oxidoreductase activity, transposing S-S bonds;	K09580	PDIA1, P4HB; protein disulfide-isomerase A1 [EC:5.3.4.1]	map04141 Protein processing in endoplasmic reticulum	PF00085; PF13848	Thioredoxin; Thioredoxin-like domain
TRINITY_DN22505_c0_g1	peroxidase 63-like protein	0.581	Down	0.0108037	---	37.065	1.016	1.197	1.358	0.6	0.669	0.807	0.963	0.997	1.047	1.458	1.147	0.804	extracellular		GO:0005618 cell wall; GO:0005622 intracellular; GO:0005623 cell; GO:0005737 cytoplasm; GO:0005829 cytosol; GO:0009505 plant-type cell wall; GO:0030312 external encapsulating structure; GO:0044424 intracellular part; GO:0044444 cytoplasmic part; GO:0044464 cell part; GO:0071944 cell periphery;		K00430	E1.11.1.7; peroxidase [EC:1.11.1.7]	map00940 Phenylpropanoid biosynthesis; map01100 Metabolic pathways; map01110 Biosynthesis of secondary metabolites	PF00141	Peroxidase
TRINITY_DN8668_c0_g1	hypothetical protein TSUD_32860	0.573	Down	0.0133004	---	21.835	1.569		1.399	0.876		0.825	0.891		1.033	0.65		0.701	chloroplast	GO:0005975 carbohydrate metabolic process; GO:0005996 monosaccharide metabolic process; GO:0006082 organic acid metabolic process; GO:0006732 coenzyme metabolic process; GO:0006766 vitamin metabolic process; GO:0006767 water-soluble vitamin metabolic process; GO:0008152 metabolic process; GO:0009058 biosynthetic process; GO:0009108 coenzyme biosynthetic process; GO:0009110 vitamin biosynthetic pr…	GO:0005622 intracellular; GO:0005623 cell; GO:0005737 cytoplasm; GO:0005829 cytosol; GO:0044424 intracellular part; GO:0044444 cytoplasmic part; GO:0044464 cell part;	GO:0000166 nucleotide binding; GO:0003824 catalytic activity; GO:0005488 binding; GO:0016853 isomerase activity; GO:0016854 racemase and epimerase activity; GO:0016857 racemase and epimerase activity, acting on carbohydrates and derivatives; GO:0036094 small molecule binding; GO:0047918 GDP-mannose 3,5-epimerase activity; GO:0048037 cofactor binding; GO:0050662 coenzyme binding; GO:0051287 NAD bi…	K10046	GME; GDP-D-mannose 3', 5'-epimerase [EC:5.1.3.18 5.1.3.-]	map00053 Ascorbate and aldarate metabolism; map00520 Amino sugar and nucleotide sugar metabolism; map01100 Metabolic pathways; map01110 Biosynthesis of secondary metabolites
TRINITY_DN261_c0_g1	p-type H+-ATPase	0.545	Down	0.00096392	---	104.72	1.529	1.405	1.423	0.772	0.89	0.712	1.021	1.04	0.945	0.617	0.683	0.775	plasma membrane	GO:0001101 response to acid chemical; GO:0006810 transport; GO:0006811 ion transport; GO:0006812 cation transport; GO:0006950 response to stress; GO:0009414 response to water deprivation; GO:0009415 response to water; GO:0009628 response to abiotic stimulus; GO:0009719 response to endogenous stimulus; GO:0009725 response to hormone; GO:0009737 response to abscisic acid; GO:0009987 cellular proces…	GO:0005622 intracellular; GO:0005623 cell; GO:0005634 nucleus; GO:0005737 cytoplasm; GO:0005773 vacuole; GO:0005794 Golgi apparatus; GO:0005886 plasma membrane; GO:0005911 cell-cell junction; GO:0009506 plasmodesma; GO:0012505 endomembrane system; GO:0016020 membrane; GO:0016021 integral component of membrane; GO:0030054 cell junction; GO:0031224 intrinsic component of membrane; GO:0043226 organe…	GO:0000287 magnesium ion binding; GO:0003824 catalytic activity; GO:0005215 transporter activity; GO:0005488 binding; GO:0008324 cation transmembrane transporter activity; GO:0008553 hydrogen-exporting ATPase activity, phosphorylative mechanism; GO:0015075 ion transmembrane transporter activity; GO:0015077 monovalent inorganic cation transmembrane transporter activity; GO:0015078 hydrogen ion tra…	K01535	PMA1, PMA2; H+-transporting ATPase [EC:7.1.2.1]	map00190 Oxidative phosphorylation; map01100 Metabolic pathways	PF00690; PF00702	Cation transporter/ATPase, N-terminus; haloacid dehalogenase-like hydrolase
TRINITY_DN15803_c0_g1	11S globulin seed storage protein 2	0.274	Down	0.0025833	---	38.919	2.036	1.247	1.563	0.404	0.363	0.561	1.034	1.893	1.157	0.418	0.377	0.637	cytoplasm							PF00190	Cupin
TRINITY_DN6049_c0_g1	adenosylhomocysteinase	0.409	Down	0.0022762	---	53.207	1.93	1.491	1.716	0.698	0.829	0.574	0.872	1.008	1.104	0.449	0.562	0.426	cytoplasm				K01251	E3.3.1.1, ahcY; adenosylhomocysteinase [EC:3.3.1.1]	map00270 Cysteine and methionine metabolism; map01100 Metabolic pathways	PF05221; PF00670	S-adenosyl-L-homocysteine hydrolase; S-adenosyl-L-homocysteine hydrolase, NAD binding domain
TRINITY_DN28458_c0_g1	probable glutathione S-transferase	0.632	Down	0.049385	---	25.359	2.04	1.415	1.533	0.969	1.312	0.869	0.559	0.751	0.984	0.377	0.534	0.551	chloroplast	GO:0001101 response to acid chemical; GO:0006518 peptide metabolic process; GO:0006575 cellular modified amino acid metabolic process; GO:0006749 glutathione metabolic process; GO:0006790 sulfur compound metabolic process; GO:0006807 nitrogen compound metabolic process; GO:0006950 response to stress; GO:0008152 metabolic process; GO:0009056 catabolic process; GO:0009266 response to temperature st…	GO:0005622 intracellular; GO:0005623 cell; GO:0005737 cytoplasm; GO:0044424 intracellular part; GO:0044464 cell part;	GO:0003824 catalytic activity; GO:0004364 glutathione transferase activity; GO:0016740 transferase activity; GO:0016765 transferase activity, transferring alkyl or aryl (other than methyl) groups;	K00799	GST, gst; glutathione S-transferase [EC:2.5.1.18]	map00480 Glutathione metabolism; map01100 Metabolic pathways	PF02798; PF00043	Glutathione S-transferase, N-terminal domain; Glutathione S-transferase, C-terminal domain
TRINITY_DN106_c0_g1	importin beta-like SAD2 isoform X1	0.662	Down	0.026664	---	119.17	1.546	1.405	1.109	1.008	0.877	0.802	0.78	1.053	0.933	0.69	0.554	0.992	chloroplast	GO:0006606 protein import into nucleus; GO:0006810 transport; GO:0006886 intracellular protein transport; GO:0006913 nucleocytoplasmic transport; GO:0007154 cell communication; GO:0007165 signal transduction; GO:0008104 protein localization; GO:0009892 negative regulation of metabolic process; GO:0009987 cellular process; GO:0010468 regulation of gene expression; GO:0010605 negative regulation of…	GO:0005622 intracellular; GO:0005623 cell; GO:0005634 nucleus; GO:0005635 nuclear envelope; GO:0005737 cytoplasm; GO:0005829 cytosol; GO:0012505 endomembrane system; GO:0031967 organelle envelope; GO:0031975 envelope; GO:0043226 organelle; GO:0043227 membrane-bounded organelle; GO:0043229 intracellular organelle; GO:0043231 intracellular membrane-bounded organelle; GO:0044422 organelle part; GO:0…	GO:0005215 transporter activity; GO:0008565 protein transporter activity;	K20223	IPO7, RANBP7; importin-7
TRINITY_DN18939_c0_g1	14-3-3-like protein GF14 iota	0.584	Down	0.0168981	---	29.522	1.197	1.347	1.246	0.824	0.552	0.837	1.071	1.204	1.066	0.93	0.856	0.912	mitochondria				K06630	YWHAE; 14-3-3 protein epsilon		PF00244	14-3-3 protein
TRINITY_DN9243_c0_g1	poly(U)-specific endoribonuclease-B-like protein	0.464	Down	0.000196319	---	49.767	1.294	1.383	1.448	0.577	0.666	0.669	1.007	1.123	1.141	0.94	0.67	0.678	nucleus				K14648	ENDOU, PP11; poly(U)-specific endoribonuclease [EC:3.1.-.-]
TRINITY_DN8098_c0_g1	3-dehydroquinate synthase	0.593	Down	0.0028433	---	47.991	1.397	1.254	1.607	0.888	0.846	0.789	1.053	1.079	0.906	0.663	0.696	0.629	chloroplast		GO:0005622 intracellular; GO:0005623 cell; GO:0005737 cytoplasm; GO:0005768 endosome; GO:0005794 Golgi apparatus; GO:0005802 trans-Golgi network; GO:0009507 chloroplast; GO:0009532 plastid stroma; GO:0009536 plastid; GO:0009570 chloroplast stroma; GO:0012505 endomembrane system; GO:0031410 cytoplasmic vesicle; GO:0031982 vesicle; GO:0031984 organelle subcompartment; GO:0043226 organelle; GO:00432…		K01735	aroB; 3-dehydroquinate synthase [EC:4.2.3.4]	map00400 Phenylalanine, tyrosine and tryptophan biosynthesis; map01100 Metabolic pathways; map01110 Biosynthesis of secondary metabolites; map01230 Biosynthesis of amino acids	PF01761	3-dehydroquinate synthase
TRINITY_DN38098_c0_g1	RecName: Full=Non-specific lipid-transfer protein 1; Short=LTP1; Flags: Precursor	0.38	Down	0.0083397	---	11.972	2.182	2.239		0.767	0.915		0.506	0.507		0.464	0.263		chloroplast	GO:0000003 reproduction; GO:0000902 cell morphogenesis; GO:0000904 cell morphogenesis involved in differentiation; GO:0001101 response to acid chemical; GO:0003006 developmental process involved in reproduction; GO:0006649 phospholipid transfer to membrane; GO:0006810 transport; GO:0006811 ion transport; GO:0006820 anion transport; GO:0006869 lipid transport; GO:0006950 response to stress; GO:000…	GO:0005576 extracellular region; GO:0005618 cell wall; GO:0005622 intracellular; GO:0005623 cell; GO:0005737 cytoplasm; GO:0005768 endosome; GO:0005794 Golgi apparatus; GO:0005802 trans-Golgi network; GO:0005886 plasma membrane; GO:0005911 cell-cell junction; GO:0009505 plant-type cell wall; GO:0009506 plasmodesma; GO:0009507 chloroplast; GO:0009534 chloroplast thylakoid; GO:0009536 plastid; GO:0…	GO:0005215 transporter activity; GO:0005319 lipid transporter activity; GO:0005488 binding; GO:0005515 protein binding; GO:0005516 calmodulin binding;
TRINITY_DN11883_c0_g1	uridine nucleosidase 1	0.661	Down	0.0194994	---	35.551	1.216	1.266	1.44	0.937	0.954	0.703	1.153	0.99	1.14	0.715	0.791	0.659	cytoplasm	GO:0006139 nucleobase-containing compound metabolic process; GO:0006152 purine nucleoside catabolic process; GO:0006213 pyrimidine nucleoside metabolic process; GO:0006218 uridine catabolic process; GO:0006725 cellular aromatic compound metabolic process; GO:0006807 nitrogen compound metabolic process; GO:0008152 metabolic process; GO:0009056 catabolic process; GO:0009116 nucleoside metabolic pro…	GO:0005622 intracellular; GO:0005623 cell; GO:0005737 cytoplasm; GO:0005829 cytosol; GO:0044424 intracellular part; GO:0044444 cytoplasmic part; GO:0044464 cell part;	GO:0003824 catalytic activity; GO:0008477 purine nucleosidase activity; GO:0016787 hydrolase activity; GO:0016798 hydrolase activity, acting on glycosyl bonds; GO:0016799 hydrolase activity, hydrolyzing N-glycosyl compounds; GO:0045437 uridine nucleosidase activity; GO:0047622 adenosine nucleosidase activity; GO:0047724 inosine nucleosidase activity; GO:0050263 ribosylpyrimidine nucleosidase acti…	K01240	URH1; uridine nucleosidase [EC:3.2.2.3]	map00240 Pyrimidine metabolism; map00760 Nicotinate and nicotinamide metabolism; map01100 Metabolic pathways	PF01156	Inosine-uridine preferring nucleoside hydrolase
TRINITY_DN20630_c0_g1	polygalacturonase inhibitor-like	0.385	Down	0.0023204	---	38.005		1.678	1.59		0.606	0.653		1.147	1.231		0.528	0.428	extracellular	GO:0043086 negative regulation of catalytic activity; GO:0044092 negative regulation of molecular function; GO:0050790 regulation of catalytic activity; GO:0065007 biological regulation; GO:0065009 regulation of molecular function;	GO:0005618 cell wall; GO:0005622 intracellular; GO:0005623 cell; GO:0005737 cytoplasm; GO:0005794 Golgi apparatus; GO:0005911 cell-cell junction; GO:0009505 plant-type cell wall; GO:0009506 plasmodesma; GO:0012505 endomembrane system; GO:0016020 membrane; GO:0030054 cell junction; GO:0030312 external encapsulating structure; GO:0043226 organelle; GO:0043227 membrane-bounded organelle; GO:0043229 …	GO:0004857 enzyme inhibitor activity; GO:0030234 enzyme regulator activity; GO:0090353 polygalacturonase inhibitor activity; GO:0098772 molecular function regulator;
TRINITY_DN8989_c0_g1	hypothetical protein TSUD_10090	0.508	Down	0.0012018	---	39.503	1.671	1.309	1.403	0.691	0.748	0.788	0.994	1.202	0.974	0.634	0.544	0.763	chloroplast	GO:0006950 response to stress; GO:0006970 response to osmotic stress; GO:0009628 response to abiotic stimulus; GO:0009651 response to salt stress; GO:0050896 response to stimulus;	GO:0005622 intracellular; GO:0005623 cell; GO:0005737 cytoplasm; GO:0005768 endosome; GO:0005794 Golgi apparatus; GO:0005802 trans-Golgi network; GO:0012505 endomembrane system; GO:0031410 cytoplasmic vesicle; GO:0031982 vesicle; GO:0031984 organelle subcompartment; GO:0043226 organelle; GO:0043227 membrane-bounded organelle; GO:0043229 intracellular organelle; GO:0043231 intracellular membrane-b…
TRINITY_DN13522_c0_g1	protein DMR6-LIKE OXYGENASE 2 isoform X1	0.387	Down	0.0033402	---	39.151	1.46	1.088	1.355	0.475	0.627	0.409	1.344	1.504	1.831	0.466	0.544	0.361	cytoplasm	GO:0000003 reproduction; GO:0000902 cell morphogenesis; GO:0001101 response to acid chemical; GO:0003006 developmental process involved in reproduction; GO:0006082 organic acid metabolic process; GO:0006629 lipid metabolic process; GO:0006720 isoprenoid metabolic process; GO:0006721 terpenoid metabolic process; GO:0007154 cell communication; GO:0007165 signal transduction; GO:0007275 multicellula…	GO:0005622 intracellular; GO:0005623 cell; GO:0005737 cytoplasm; GO:0044424 intracellular part; GO:0044464 cell part;	GO:0003824 catalytic activity; GO:0016491 oxidoreductase activity; GO:0016705 oxidoreductase activity, acting on paired donors, with incorporation or reduction of molecular oxygen; GO:0016706 oxidoreductase activity, acting on paired donors, with incorporation or reduction of molecular oxygen, 2-oxoglutarate as one donor, and incorporation of one atom each of oxygen into both donors; GO:0045544 g…				PF03171	2OG-Fe(II) oxygenase superfamily
TRINITY_DN16841_c0_g1	PIP2-2	0.569	Down	0.0027985	---	30.579	1.488	1.557	1.355	0.926	0.716	0.86	0.845	0.982	1.119	0.614	0.697	0.631	plasma membrane				K09872	PIP; aquaporin PIP
TRINITY_DN7221_c0_g1	hypothetical protein TSUD_262640	0.617	Down	0.020123	---	49.365	1.216	1.24	1.456	0.937	0.846	0.63	0.992	1.096	1.353	0.94	0.809	0.479	cytoplasm				K03231	EEF1A; elongation factor 1-alpha	map03013 RNA transport	PF00009; PF03144; PF03143	Elongation factor Tu GTP binding domain; Elongation factor Tu domain 2; Elongation factor Tu C-terminal domain
TRINITY_DN19355_c0_g1	endochitinase A2	0.238	Down	0.010599	---	39.827	1.658	1.719	1.643	0.338	0.525	0.33	1.139	1.032	1.48	0.8	0.579	0.419	extracellular				K20547	CHIB; basic endochitinase B [EC:3.2.1.14]	map00520 Amino sugar and nucleotide sugar metabolism; map01100 Metabolic pathways; map04016 MAPK signaling pathway - plant	PF00187; PF00182	Chitin recognition protein; Chitinase class I
TRINITY_DN41330_c0_g1	basic blue protein	0.514	Down	0.00112383	---	13.008	1.247	1.089	1.25	0.697	0.565	0.581	1.18	1.464	1.223	0.879	0.831	0.915	extracellular							PF02298	Plastocyanin-like domain
TRINITY_DN707_c0_g1	lipoxygenase LOXN3	0.285	Down	0.00066224	---	96.962	2.164	1.713	1.568	0.49	0.609	0.452	0.8	1.232	1.401	0.39	0.266	0.409	cytoplasm				K15718	LOX1_5; linoleate 9S-lipoxygenase [EC:1.13.11.58]	map00591 Linoleic acid metabolism	PF01477; PF00305	PLAT/LH2 domain; Lipoxygenase
TRINITY_DN868_c0_g1	YTH domain-containing protein ECT4 isoform X1	0.571	Down	0.0186381	---	74.105	1.59	1.271	1.267	0.658	0.997	0.703	1.194	1.059	1.268	0.423	0.664	0.722	nucleus				K20102	YTHDF; YTH domain-containing family protein		PF04146	YT521-B-like domain
TRINITY_DN8077_c0_g1	alanine--glyoxylate aminotransferase 2 homolog 3, mitochondrial	0.325	Down	0.00030038	---	56.664	1.888	1.72	1.684	0.492	0.67	0.558	0.877	0.982	1.131	0.669	0.563	0.594	mitochondria	GO:0007154 cell communication; GO:0009605 response to external stimulus; GO:0009987 cellular process; GO:0009991 response to extracellular stimulus; GO:0031667 response to nutrient levels; GO:0031668 cellular response to extracellular stimulus; GO:0031669 cellular response to nutrient levels; GO:0043562 cellular response to nitrogen levels; GO:0050896 response to stimulus; GO:0051716 cellular res…	GO:0005622 intracellular; GO:0005623 cell; GO:0005737 cytoplasm; GO:0005739 mitochondrion; GO:0043226 organelle; GO:0043227 membrane-bounded organelle; GO:0043229 intracellular organelle; GO:0043231 intracellular membrane-bounded organelle; GO:0044424 intracellular part; GO:0044444 cytoplasmic part; GO:0044464 cell part;	GO:0003824 catalytic activity; GO:0005488 binding; GO:0005515 protein binding; GO:0008144 drug binding; GO:0008453 alanine-glyoxylate transaminase activity; GO:0008483 transaminase activity; GO:0016740 transferase activity; GO:0016769 transferase activity, transferring nitrogenous groups; GO:0019842 vitamin binding; GO:0030170 pyridoxal phosphate binding; GO:0036094 small molecule binding; GO:004…	K00827	AGXT2; alanine-glyoxylate transaminase / (R)-3-amino-2-methylpropionate-pyruvate transaminase [EC:2.6.1.44 2.6.1.40]	map00250 Alanine, aspartate and glutamate metabolism; map00260 Glycine, serine and threonine metabolism; map00270 Cysteine and methionine metabolism; map00280 Valine, leucine and isoleucine degradation; map01100 Metabolic pathways; map01110 Biosynthesis of secondary metabolites	PF00202	Aminotransferase class-III
TRINITY_DN4753_c0_g1	protein WVD2-like 5	0.512	Down	0.00064388	---	34.542		1.453	1.426		0.726	0.747		1.274	1.161		0.482	0.607	nucleus	GO:0009719 response to endogenous stimulus; GO:0009723 response to ethylene; GO:0009725 response to hormone; GO:0009987 cellular process; GO:0010033 response to organic substance; GO:0032870 cellular response to hormone stimulus; GO:0042221 response to chemical; GO:0050896 response to stimulus; GO:0051716 cellular response to stimulus; GO:0070887 cellular response to chemical stimulus; GO:0071310…		GO:0005488 binding; GO:0005515 protein binding; GO:0008017 microtubule binding; GO:0008092 cytoskeletal protein binding; GO:0015631 tubulin binding;
TRINITY_DN17198_c0_g1	peroxidase	0.625	Down	0.0089213	---	37.988	1.316	1.418		0.875	0.833		0.895	1.118		0.932	0.592		extracellular	GO:0000902 cell morphogenesis; GO:0002682 regulation of immune system process; GO:0002684 positive regulation of immune system process; GO:0006950 response to stress; GO:0006952 defense response; GO:0006970 response to osmotic stress; GO:0008152 metabolic process; GO:0009314 response to radiation; GO:0009416 response to light stimulus; GO:0009605 response to external stimulus; GO:0009607 response…	GO:0005576 extracellular region; GO:0005618 cell wall; GO:0005622 intracellular; GO:0005623 cell; GO:0005737 cytoplasm; GO:0005773 vacuole; GO:0005774 vacuolar membrane; GO:0005794 Golgi apparatus; GO:0009505 plant-type cell wall; GO:0012505 endomembrane system; GO:0016020 membrane; GO:0030312 external encapsulating structure; GO:0031090 organelle membrane; GO:0043226 organelle; GO:0043227 membra…	GO:0003824 catalytic activity; GO:0004601 peroxidase activity; GO:0016209 antioxidant activity; GO:0016491 oxidoreductase activity; GO:0016684 oxidoreductase activity, acting on peroxide as acceptor;	K00430	E1.11.1.7; peroxidase [EC:1.11.1.7]	map00940 Phenylpropanoid biosynthesis; map01100 Metabolic pathways; map01110 Biosynthesis of secondary metabolites	PF00141	Peroxidase
TRINITY_DN153_c0_g1	RecName: Full=Glycine dehydrogenase (decarboxylating), mitochondrial; AltName: Full=Glycine cleavage system P protein; AltName: Full=Glycine decarboxylase; AltName: Full=Glycine dehydrogenase (aminomethyl-transferring); Flags: Precursor	0.582	Down	0.00038377	---	75.814	1.591	1.406	1.493	0.832	0.93	0.853	0.875	0.992	0.977	0.682	0.653	0.905	mitochondria	GO:0001505 regulation of neurotransmitter levels; GO:0006082 organic acid metabolic process; GO:0006520 cellular amino acid metabolic process; GO:0006544 glycine metabolic process; GO:0006546 glycine catabolic process; GO:0006807 nitrogen compound metabolic process; GO:0008152 metabolic process; GO:0009056 catabolic process; GO:0009063 cellular amino acid catabolic process; GO:0009069 serine fami…	GO:0005576 extracellular region; GO:0005622 intracellular; GO:0005623 cell; GO:0005737 cytoplasm; GO:0005739 mitochondrion; GO:0009507 chloroplast; GO:0009526 plastid envelope; GO:0009532 plastid stroma; GO:0009534 chloroplast thylakoid; GO:0009536 plastid; GO:0009570 chloroplast stroma; GO:0009579 thylakoid; GO:0009941 chloroplast envelope; GO:0031967 organelle envelope; GO:0031975 envelope; GO:…		K00281	GLDC, gcvP; glycine dehydrogenase [EC:1.4.4.2]	map00260 Glycine, serine and threonine metabolism; map00630 Glyoxylate and dicarboxylate metabolism; map01100 Metabolic pathways; map01110 Biosynthesis of secondary metabolites; map01200 Carbon metabolism	PF02347	Glycine cleavage system P-protein
TRINITY_DN11044_c0_g1	tubulin alpha-1 chain	0.599	Down	0.000119054	---	53.116	1.291	1.34	1.251	0.782	0.735	0.809	0.86	1.251	1.108	1.077	0.7	0.809	extracellular	GO:0007017 microtubule-based process; GO:0009987 cellular process;	GO:0005622 intracellular; GO:0005623 cell; GO:0005737 cytoplasm; GO:0005829 cytosol; GO:0005856 cytoskeleton; GO:0005886 plasma membrane; GO:0016020 membrane; GO:0043226 organelle; GO:0043228 non-membrane-bounded organelle; GO:0043229 intracellular organelle; GO:0043232 intracellular non-membrane-bounded organelle; GO:0044424 intracellular part; GO:0044444 cytoplasmic part; GO:0044464 cell part; …		K07374	TUBA; tubulin alpha	map04145 Phagosome	PF00091; PF03953	Tubulin/FtsZ family, GTPase domain; Tubulin C-terminal domain
TRINITY_DN13912_c0_g1	hypothetical protein TSUD_311810	0.522	Down	0.0125448	---	40.022	1.566	1.538	1.561	0.904	0.83	0.703	0.942	1.098	1.134	0.573	0.468	0.555	chloroplast	GO:0003002 regionalization; GO:0006275 regulation of DNA replication; GO:0006629 lipid metabolic process; GO:0006694 steroid biosynthetic process; GO:0007275 multicellular organism development; GO:0007389 pattern specification process; GO:0008152 metabolic process; GO:0008156 negative regulation of DNA replication; GO:0008202 steroid metabolic process; GO:0008610 lipid biosynthetic process; GO:00…	GO:0005622 intracellular; GO:0005623 cell; GO:0005737 cytoplasm; GO:0005783 endoplasmic reticulum; GO:0005794 Golgi apparatus; GO:0012505 endomembrane system; GO:0043226 organelle; GO:0043227 membrane-bounded organelle; GO:0043229 intracellular organelle; GO:0043231 intracellular membrane-bounded organelle; GO:0044424 intracellular part; GO:0044444 cytoplasmic part; GO:0044464 cell part;	GO:0003824 catalytic activity; GO:0003838 sterol 24-C-methyltransferase activity; GO:0008168 methyltransferase activity; GO:0008169 C-methyltransferase activity; GO:0008757 S-adenosylmethionine-dependent methyltransferase activity; GO:0016740 transferase activity; GO:0016741 transferase activity, transferring one-carbon groups;	K08242	E2.1.1.143; 24-methylenesterol C-methyltransferase [EC:2.1.1.143]	map00100 Steroid biosynthesis; map01110 Biosynthesis of secondary metabolites	PF08241	Methyltransferase domain
TRINITY_DN5880_c0_g1	fiddlehead-like protein	0.615	Down	0.0047392	---	60.62	1.566	1.339	1.277	0.768	0.863	0.942	1.073	1.127	1.066	0.565	0.648	0.69	plasma membrane	GO:0006950 response to stress; GO:0009266 response to temperature stimulus; GO:0009314 response to radiation; GO:0009409 response to cold; GO:0009416 response to light stimulus; GO:0009628 response to abiotic stimulus; GO:0050896 response to stimulus; GO:0080167 response to karrikin;	GO:0005622 intracellular; GO:0005623 cell; GO:0005737 cytoplasm; GO:0005783 endoplasmic reticulum; GO:0012505 endomembrane system; GO:0016020 membrane; GO:0043226 organelle; GO:0043227 membrane-bounded organelle; GO:0043229 intracellular organelle; GO:0043231 intracellular membrane-bounded organelle; GO:0044424 intracellular part; GO:0044444 cytoplasmic part; GO:0044464 cell part;		K15397	KCS; 3-ketoacyl-CoA synthase [EC:2.3.1.199]	map00062 Fatty acid elongation; map01100 Metabolic pathways; map01110 Biosynthesis of secondary metabolites; map04626 Plant-pathogen interaction	PF08541	3-Oxoacyl-[acyl-carrier-protein (ACP)] synthase III C terminal
TRINITY_DN1055_c0_g1	beta-galactosidase 5	0.441	Down	0.00147976	---	83.512	1.604	1.903	1.374	0.658	0.768	0.728	0.943	0.773	1.111	0.762	0.493	0.743	chloroplast		GO:0005618 cell wall; GO:0005622 intracellular; GO:0005623 cell; GO:0005737 cytoplasm; GO:0005773 vacuole; GO:0009505 plant-type cell wall; GO:0030312 external encapsulating structure; GO:0043226 organelle; GO:0043227 membrane-bounded organelle; GO:0043229 intracellular organelle; GO:0043231 intracellular membrane-bounded organelle; GO:0044424 intracellular part; GO:0044444 cytoplasmic part; GO:0…	GO:0003824 catalytic activity; GO:0004553 hydrolase activity, hydrolyzing O-glycosyl compounds; GO:0004565 beta-galactosidase activity; GO:0015925 galactosidase activity; GO:0016787 hydrolase activity; GO:0016798 hydrolase activity, acting on glycosyl bonds;				PF01301	Glycosyl hydrolases family 35
TRINITY_DN19838_c0_g1	isoflavone reductase-like protein	0.489	Down	0.004064	---	33.889	1.566	1.805	1.552	0.982	0.672	0.754	1.037	0.891	0.7	0.442	0.611	0.942	cytoplasm				K23050	PCBER1; phenylcoumaran benzylic ether reductase [EC:1.3.1.-]
TRINITY_DN53695_c0_g1	transport protein SEC61 subunit beta-like, partial	0.396	Down	0.0028374	---	10.731	1.57	1.455	1.463	0.497	0.51	0.772	1.197	1.494	1.266	0.669	0.452	0.617	chloroplast	GO:0006605 protein targeting; GO:0006612 protein targeting to membrane; GO:0006613 cotranslational protein targeting to membrane; GO:0006614 SRP-dependent cotranslational protein targeting to membrane; GO:0006616 SRP-dependent cotranslational protein targeting to membrane, translocation; GO:0006620 posttranslational protein targeting to membrane; GO:0006810 transport; GO:0006886 intracellular pro…	GO:0005622 intracellular; GO:0005623 cell; GO:0005737 cytoplasm; GO:0005783 endoplasmic reticulum; GO:0005789 endoplasmic reticulum membrane; GO:0005791 rough endoplasmic reticulum; GO:0012505 endomembrane system; GO:0016020 membrane; GO:0030867 rough endoplasmic reticulum membrane; GO:0031090 organelle membrane; GO:0031205 endoplasmic reticulum Sec complex; GO:0031984 organelle subcompartment; G…	GO:0005085 guanyl-nucleotide exchange factor activity; GO:0005086 ARF guanyl-nucleotide exchange factor activity; GO:0005488 binding; GO:0005515 protein binding; GO:0019899 enzyme binding; GO:0051020 GTPase binding; GO:0098772 molecular function regulator;	K09481	SEC61B, SBH2; protein transport protein SEC61 subunit beta	map03060 Protein export; map04141 Protein processing in endoplasmic reticulum; map04145 Phagosome
TRINITY_DN32773_c0_g1	glycine-rich RNA-binding protein GRP1A	0.64	Down	0.00085788	---	16.421	1.229	1.286	1.245	0.784	0.877	0.745	1.115	1.172	1.15	0.844	0.576	0.795	nucleus				K13195	CIRBP; cold-inducible RNA-binding protein		PF00076	RNA recognition motif. (a.k.a. RRM, RBD, or RNP domain)
TRINITY_DN13738_c0_g1	peroxidase 3	0.155	Down	0.0032612	---	35.41	2.864	2.269	1.395	0.287	0.241	0.482	0.35	1.07	1.402	0.312	0.261	0.522	extracellular	GO:0001101 response to acid chemical; GO:0006950 response to stress; GO:0006970 response to osmotic stress; GO:0006972 hyperosmotic response; GO:0008152 metabolic process; GO:0009266 response to temperature stimulus; GO:0009269 response to desiccation; GO:0009409 response to cold; GO:0009414 response to water deprivation; GO:0009415 response to water; GO:0009628 response to abiotic stimulus; GO:0…	GO:0005618 cell wall; GO:0005622 intracellular; GO:0005623 cell; GO:0005634 nucleus; GO:0005737 cytoplasm; GO:0005783 endoplasmic reticulum; GO:0005911 cell-cell junction; GO:0009505 plant-type cell wall; GO:0009506 plasmodesma; GO:0012505 endomembrane system; GO:0030054 cell junction; GO:0030312 external encapsulating structure; GO:0043226 organelle; GO:0043227 membrane-bounded organelle; GO:004…	GO:0003824 catalytic activity; GO:0004601 peroxidase activity; GO:0016209 antioxidant activity; GO:0016491 oxidoreductase activity; GO:0016684 oxidoreductase activity, acting on peroxide as acceptor;	K00430	E1.11.1.7; peroxidase [EC:1.11.1.7]	map00940 Phenylpropanoid biosynthesis; map01100 Metabolic pathways; map01110 Biosynthesis of secondary metabolites	PF00141	Peroxidase
TRINITY_DN20029_c0_g1	flavonol synthase	0.629	Down	0.0101212	---	37.916	1.357	1.237		0.81	0.822		0.967	1.056		0.872	0.881		cytoplasm		GO:0005622 intracellular; GO:0005623 cell; GO:0005737 cytoplasm; GO:0044424 intracellular part; GO:0044464 cell part;		K05278	FLS; flavonol synthase [EC:1.14.20.6]	map00941 Flavonoid biosynthesis; map01100 Metabolic pathways; map01110 Biosynthesis of secondary metabolites	PF03171	2OG-Fe(II) oxygenase superfamily
TRINITY_DN17388_c0_g1	uncharacterized protein LOC25479953	0.477	Down	0.00142117	---	39.853	1.61	1.22	1.527	0.663	0.748	0.668	1.127	1.372	1.197	0.579	0.458	0.527	vacuolar membrane							PF04862	Protein of unknown function, DUF642
TRINITY_DN31290_c0_g1	hypothetical protein TSUD_160250, partial	0.363	Down	0.020577	---	21.338		1.641	1.795		0.535	0.711		1.177	0.595		0.567	0.829	cytoskeleton				K13265	VR; vestitone reductase [EC:1.1.1.348]	map00943 Isoflavonoid biosynthesis; map01110 Biosynthesis of secondary metabolites
TRINITY_DN466_c0_g1	dynamin-2A isoform X2	0.565	Down	0.0055161	---	83.017		1.458	1.506		0.87	0.804		0.971	1.06		0.677	0.564	nucleus	GO:0000266 mitochondrial fission; GO:0000902 cell morphogenesis; GO:0000904 cell morphogenesis involved in differentiation; GO:0001101 response to acid chemical; GO:0006810 transport; GO:0006892 post-Golgi vesicle-mediated transport; GO:0006896 Golgi to vacuole transport; GO:0006897 endocytosis; GO:0006898 receptor-mediated endocytosis; GO:0006996 organelle organization; GO:0007005 mitochondrion …	GO:0005622 intracellular; GO:0005623 cell; GO:0005737 cytoplasm; GO:0005773 vacuole; GO:0005774 vacuolar membrane; GO:0005794 Golgi apparatus; GO:0005829 cytosol; GO:0005886 plasma membrane; GO:0005911 cell-cell junction; GO:0009504 cell plate; GO:0009506 plasmodesma; GO:0012505 endomembrane system; GO:0016020 membrane; GO:0030054 cell junction; GO:0030135 coated vesicle; GO:0030136 clathrin-coat…	GO:0003824 catalytic activity; GO:0003924 GTPase activity; GO:0005488 binding; GO:0005515 protein binding; GO:0008017 microtubule binding; GO:0008092 cytoskeletal protein binding; GO:0015631 tubulin binding; GO:0016462 pyrophosphatase activity; GO:0016787 hydrolase activity; GO:0016817 hydrolase activity, acting on acid anhydrides; GO:0016818 hydrolase activity, acting on acid anhydrides, in phos…	K01528	DNM1_3; dynamin 1/3 [EC:3.6.5.5]	map04144 Endocytosis	PF00169	PH domain
TRINITY_DN3514_c0_g1	putative AMP-dependent synthetase/ligase, AMP-binding enzyme domain-containing protein	0.526	Down	0.00021799	---	37.988	1.63	1.565	1.642	0.825	0.929	0.791	0.865	0.852	0.951	0.657	0.561	0.64	chloroplast	GO:0006082 organic acid metabolic process; GO:0008152 metabolic process; GO:0009058 biosynthetic process; GO:0009694 jasmonic acid metabolic process; GO:0009695 jasmonic acid biosynthetic process; GO:0009987 cellular process; GO:0010817 regulation of hormone levels; GO:0016053 organic acid biosynthetic process; GO:0019752 carboxylic acid metabolic process; GO:0032787 monocarboxylic acid metabolic…	GO:0005622 intracellular; GO:0005623 cell; GO:0005737 cytoplasm; GO:0005777 peroxisome; GO:0042579 microbody; GO:0043226 organelle; GO:0043227 membrane-bounded organelle; GO:0043229 intracellular organelle; GO:0043231 intracellular membrane-bounded organelle; GO:0044424 intracellular part; GO:0044444 cytoplasmic part; GO:0044464 cell part;	GO:0003824 catalytic activity; GO:0004321 fatty-acyl-CoA synthase activity; GO:0016408 C-acyltransferase activity; GO:0016740 transferase activity; GO:0016746 transferase activity, transferring acyl groups; GO:0016747 transferase activity, transferring acyl groups other than amino-acyl groups;	K01904	4CL; 4-coumarate--CoA ligase [EC:6.2.1.12]	map00130 Ubiquinone and other terpenoid-quinone biosynthesis; map00940 Phenylpropanoid biosynthesis; map01100 Metabolic pathways; map01110 Biosynthesis of secondary metabolites	PF13193	Domain of unknown function (DUF4009)
TRINITY_DN33289_c0_g1	selenoprotein H	0.575	Down	0.0025844	---	18.841	1.226	1.193	1.304	0.701	0.621	0.817	0.778	1.322	1.27	1.32	0.83	0.56	nucleus
TRINITY_DN45447_c0_g1	hypothetical protein TSUD_182740	0.538	Down	0.048579	---	13.995		1.292	1.152		0.571	0.743		1.319	1.206		0.769	0.887	nucleus
TRINITY_DN6217_c0_g1	L-ascorbate oxidase homolog	0.585	Down	0.0024198	---	60.12	1.466	1.598	1.714	0.963	1.014	0.818	0.676	0.771	0.665	0.908	0.6	0.739	vacuolar membrane				K19791	FET3_5; iron transport multicopper oxidase		PF07732; PF00394; PF07731	Multicopper oxidase; Multicopper oxidase; Multicopper oxidase
TRINITY_DN3338_c0_g1	PsAPY2	0.641	Down	0.00150131	---	50.957	1.342	1.377	1.495	0.984	0.838	0.881	1.019	1.074	0.888	0.67	0.621	0.689	cytoplasm		GO:0005622 intracellular; GO:0005623 cell; GO:0005634 nucleus; GO:0043226 organelle; GO:0043227 membrane-bounded organelle; GO:0043229 intracellular organelle; GO:0043231 intracellular membrane-bounded organelle; GO:0044424 intracellular part; GO:0044464 cell part;		K14641	APY1_2; apyrase [EC:3.6.1.5]	map00230 Purine metabolism; map00240 Pyrimidine metabolism; map01100 Metabolic pathways
TRINITY_DN871_c0_g1	minichromosome maintenance 4 protein	0.588	Down	0.0130043	---	92.714	1.6	1.353	1.409	0.781	1.061	0.725	1.013	1.01	1.197	0.636	0.562	0.609	nucleus	GO:0006139 nucleobase-containing compound metabolic process; GO:0006259 DNA metabolic process; GO:0006260 DNA replication; GO:0006261 DNA-dependent DNA replication; GO:0006268 DNA unwinding involved in DNA replication; GO:0006275 regulation of DNA replication; GO:0006725 cellular aromatic compound metabolic process; GO:0006807 nitrogen compound metabolic process; GO:0006996 organelle organization…	GO:0000347 THO complex; GO:0000785 chromatin; GO:0005622 intracellular; GO:0005623 cell; GO:0005634 nucleus; GO:0005694 chromosome; GO:0005737 cytoplasm; GO:0005829 cytosol; GO:0032991 macromolecular complex; GO:0042555 MCM complex; GO:0043226 organelle; GO:0043227 membrane-bounded organelle; GO:0043228 non-membrane-bounded organelle; GO:0043229 intracellular organelle; GO:0043231 intracellular m…	GO:0003682 chromatin binding; GO:0005488 binding;	K02212	MCM4, CDC54; DNA replication licensing factor MCM4 [EC:3.6.4.12]	map03030 DNA replication	PF00493	MCM2/3/5 family
TRINITY_DN10206_c0_g1	S-adenosylmethionine synthase 2	0.318	Down	0.00036187	---	23.207	1.682	1.824	1.864	0.654	0.585	0.468	1.07	1.224	1.179	0.546	0.253	0.349	cytoplasm		GO:0005622 intracellular; GO:0005623 cell; GO:0005737 cytoplasm; GO:0005829 cytosol; GO:0044424 intracellular part; GO:0044444 cytoplasmic part; GO:0044464 cell part;	GO:0003824 catalytic activity; GO:0004478 methionine adenosyltransferase activity; GO:0016740 transferase activity; GO:0016765 transferase activity, transferring alkyl or aryl (other than methyl) groups;	K00789	metK; S-adenosylmethionine synthetase [EC:2.5.1.6]	map00270 Cysteine and methionine metabolism; map01100 Metabolic pathways; map01110 Biosynthesis of secondary metabolites; map01230 Biosynthesis of amino acids	PF02772; PF02773	S-adenosylmethionine synthetase, central domain; S-adenosylmethionine synthetase, C-terminal domain
TRINITY_DN13237_c0_g1	beta-cyanoalanine synthase	0.567	Down	0.00019883	---	41.537	1.529	1.376	1.415	0.791	0.793	0.866	1.163	1.238	0.904	0.539	0.537	0.702	chloroplast	GO:0000096 sulfur amino acid metabolic process; GO:0000097 sulfur amino acid biosynthetic process; GO:0002376 immune system process; GO:0006082 organic acid metabolic process; GO:0006520 cellular amino acid metabolic process; GO:0006534 cysteine metabolic process; GO:0006535 cysteine biosynthetic process from serine; GO:0006563 L-serine metabolic process; GO:0006790 sulfur compound metabolic proc…	GO:0005622 intracellular; GO:0005623 cell; GO:0005737 cytoplasm; GO:0005739 mitochondrion; GO:0009507 chloroplast; GO:0009509 chromoplast; GO:0009532 plastid stroma; GO:0009536 plastid; GO:0009570 chloroplast stroma; GO:0043226 organelle; GO:0043227 membrane-bounded organelle; GO:0043229 intracellular organelle; GO:0043231 intracellular membrane-bounded organelle; GO:0044422 organelle part; GO:00…	GO:0003824 catalytic activity; GO:0004124 cysteine synthase activity; GO:0005488 binding; GO:0005507 copper ion binding; GO:0008144 drug binding; GO:0016740 transferase activity; GO:0016765 transferase activity, transferring alkyl or aryl (other than methyl) groups; GO:0016829 lyase activity; GO:0016846 carbon-sulfur lyase activity; GO:0019842 vitamin binding; GO:0030170 pyridoxal phosphate bindi…	K13034	ATCYSC1; L-3-cyanoalanine synthase/ cysteine synthase [EC:2.5.1.47 4.4.1.9]	map00270 Cysteine and methionine metabolism; map00460 Cyanoamino acid metabolism; map00920 Sulfur metabolism; map01100 Metabolic pathways; map01110 Biosynthesis of secondary metabolites; map01200 Carbon metabolism; map01230 Biosynthesis of amino acids
TRINITY_DN16163_c0_g1	putative cinnamyl-alcohol dehydrogenase	0.627	Down	0.004699	---	38.732	1.55	1.306	1.37	0.807	0.998	0.846	0.936	0.979	0.971	0.689	0.715	0.782	cytoplasm	GO:0006725 cellular aromatic compound metabolic process; GO:0008152 metabolic process; GO:0009058 biosynthetic process; GO:0009605 response to external stimulus; GO:0009607 response to biotic stimulus; GO:0009617 response to bacterium; GO:0009698 phenylpropanoid metabolic process; GO:0009699 phenylpropanoid biosynthetic process; GO:0009808 lignin metabolic process; GO:0009809 lignin biosynthetic …		GO:0003824 catalytic activity; GO:0016491 oxidoreductase activity; GO:0016614 oxidoreductase activity, acting on CH-OH group of donors; GO:0016616 oxidoreductase activity, acting on the CH-OH group of donors, NAD or NADP as acceptor; GO:0045551 cinnamyl-alcohol dehydrogenase activity; GO:0047681 aryl-alcohol dehydrogenase (NADP+) activity;	K23232	10HGO; 8-hydroxygeraniol dehydrogenase [EC:1.1.1.324]	map00902 Monoterpenoid biosynthesis; map01100 Metabolic pathways; map01110 Biosynthesis of secondary metabolites	PF08240	Alcohol dehydrogenase GroES-like domain
TRINITY_DN727_c0_g1	sucrose synthase isoform 3	0.467	Down	0.00078434	---	91.922	1.581	1.704	1.75	0.905	0.752	0.696	1.036	1.011	1.061	0.649	0.475	0.434	mitochondria	GO:0000003 reproduction; GO:0001101 response to acid chemical; GO:0001666 response to hypoxia; GO:0003006 developmental process involved in reproduction; GO:0006950 response to stress; GO:0006970 response to osmotic stress; GO:0007275 multicellular organism development; GO:0009266 response to temperature stimulus; GO:0009409 response to cold; GO:0009413 response to flooding; GO:0009414 response t…	GO:0005622 intracellular; GO:0005623 cell; GO:0005737 cytoplasm; GO:0005773 vacuole; GO:0005829 cytosol; GO:0005886 plasma membrane; GO:0005911 cell-cell junction; GO:0009506 plasmodesma; GO:0016020 membrane; GO:0030054 cell junction; GO:0043226 organelle; GO:0043227 membrane-bounded organelle; GO:0043229 intracellular organelle; GO:0043231 intracellular membrane-bounded organelle; GO:0044424 int…	GO:0003824 catalytic activity; GO:0008194 UDP-glycosyltransferase activity; GO:0016157 sucrose synthase activity; GO:0016740 transferase activity; GO:0016757 transferase activity, transferring glycosyl groups; GO:0016758 transferase activity, transferring hexosyl groups; GO:0035251 UDP-glucosyltransferase activity; GO:0046527 glucosyltransferase activity;	K00695	E2.4.1.13; sucrose synthase [EC:2.4.1.13]	map00500 Starch and sucrose metabolism; map01100 Metabolic pathways
TRINITY_DN40439_c0_g1	hypothetical protein B456_011G110600	0.487	Down	0.004637	---	13.93	1.18	1.625	1.474	0.785	0.592	0.707	0.941	0.823	1.09	1.121	0.93	0.668	chloroplast				K11253	H3; histone H3		PF00125	Core histone H2A/H2B/H3/H4
TRINITY_DN16471_c0_g1	peroxidase 42-like protein	0.585	Down	0.000161673	---	38.342	1.412	1.431	1.294	0.84	0.776	0.806	0.93	0.977	1.012	0.821	0.706	0.827	cytoplasm	GO:0008152 metabolic process; GO:0009636 response to toxic substance; GO:0009664 plant-type cell wall organization; GO:0009987 cellular process; GO:0016043 cellular component organization; GO:0042221 response to chemical; GO:0045229 external encapsulating structure organization; GO:0050896 response to stimulus; GO:0051716 cellular response to stimulus; GO:0055114 oxidation-reduction process; GO:0…	GO:0005618 cell wall; GO:0005623 cell; GO:0005911 cell-cell junction; GO:0009505 plant-type cell wall; GO:0009506 plasmodesma; GO:0030054 cell junction; GO:0030312 external encapsulating structure; GO:0044464 cell part; GO:0055044 symplast; GO:0071944 cell periphery;	GO:0003824 catalytic activity; GO:0004601 peroxidase activity; GO:0016209 antioxidant activity; GO:0016491 oxidoreductase activity; GO:0016684 oxidoreductase activity, acting on peroxide as acceptor;	K00430	E1.11.1.7; peroxidase [EC:1.11.1.7]	map00940 Phenylpropanoid biosynthesis; map01100 Metabolic pathways; map01110 Biosynthesis of secondary metabolites	PF00141	Peroxidase
TRINITY_DN29697_c0_g1	peroxidase	0.448	Down	0.00024429	---	28.102	1.531	1.808	1.65	0.774	0.682	0.781	0.804	0.903	0.779	0.748	0.539	0.727	extracellular	GO:0000902 cell morphogenesis; GO:0002682 regulation of immune system process; GO:0002684 positive regulation of immune system process; GO:0006950 response to stress; GO:0006952 defense response; GO:0006970 response to osmotic stress; GO:0008152 metabolic process; GO:0009314 response to radiation; GO:0009416 response to light stimulus; GO:0009605 response to external stimulus; GO:0009607 response…	GO:0005576 extracellular region; GO:0005618 cell wall; GO:0005622 intracellular; GO:0005623 cell; GO:0005737 cytoplasm; GO:0005773 vacuole; GO:0005774 vacuolar membrane; GO:0005794 Golgi apparatus; GO:0009505 plant-type cell wall; GO:0012505 endomembrane system; GO:0016020 membrane; GO:0030312 external encapsulating structure; GO:0031090 organelle membrane; GO:0043226 organelle; GO:0043227 membra…	GO:0003824 catalytic activity; GO:0004601 peroxidase activity; GO:0016209 antioxidant activity; GO:0016491 oxidoreductase activity; GO:0016684 oxidoreductase activity, acting on peroxide as acceptor;	K00430	E1.11.1.7; peroxidase [EC:1.11.1.7]	map00940 Phenylpropanoid biosynthesis; map01100 Metabolic pathways; map01110 Biosynthesis of secondary metabolites	PF00141	Peroxidase
TRINITY_DN35018_c0_g1	gibberellin-regulated protein 14	0.529	Down	0.0030369	---	20.418	2.275	1.742	1.912	1.175	0.994	0.97	0.138	0.898	0.609	0.358	0.31	0.409	extracellular	GO:0001101 response to acid chemical; GO:0006950 response to stress; GO:0006970 response to osmotic stress; GO:0009628 response to abiotic stimulus; GO:0009651 response to salt stress; GO:0009719 response to endogenous stimulus; GO:0009725 response to hormone; GO:0009737 response to abscisic acid; GO:0009739 response to gibberellin; GO:0010033 response to organic substance; GO:0019222 regulation …	GO:0005623 cell; GO:0005886 plasma membrane; GO:0016020 membrane; GO:0044464 cell part; GO:0071944 cell periphery;
TRINITY_DN5589_c0_g1	RecName: Full=Serine hydroxymethyltransferase, mitochondrial; Short=SHMT; AltName: Full=Glycine hydroxymethyltransferase; AltName: Full=Serine methylase; Flags: Precursor	0.475	Down	0.00124289	---	57.485	1.417	1.382	1.498	0.71	0.763	0.567	1.186	1.401	1.343	0.594	0.299	0.52	mitochondria				K00600	glyA, SHMT; glycine hydroxymethyltransferase [EC:2.1.2.1]	map00260 Glycine, serine and threonine metabolism; map00460 Cyanoamino acid metabolism; map00630 Glyoxylate and dicarboxylate metabolism; map00670 One carbon pool by folate; map01100 Metabolic pathways; map01110 Biosynthesis of secondary metabolites; map01200 Carbon metabolism; map01230 Biosynthesis of amino acids	PF00464	Serine hydroxymethyltransferase
TRINITY_DN27390_c0_g1	RecName: Full=Caffeoyl-CoA O-methyltransferase; AltName: Full=Trans-caffeoyl-CoA 3-O-methyltransferase; Short=CCoAMT; Short=CCoAOMT	0.286	Down	0.00036134	---	27.958	1.968	1.648	1.838	0.624	0.446	0.491	0.976	1.462	1.137	0.355	0.323	0.403	cytoplasm	GO:0006725 cellular aromatic compound metabolic process; GO:0008152 metabolic process; GO:0009058 biosynthetic process; GO:0009698 phenylpropanoid metabolic process; GO:0009699 phenylpropanoid biosynthetic process; GO:0009804 coumarin metabolic process; GO:0009805 coumarin biosynthetic process; GO:0009987 cellular process; GO:0010035 response to inorganic substance; GO:0010038 response to metal i…		GO:0003824 catalytic activity; GO:0008168 methyltransferase activity; GO:0008171 O-methyltransferase activity; GO:0008757 S-adenosylmethionine-dependent methyltransferase activity; GO:0016740 transferase activity; GO:0016741 transferase activity, transferring one-carbon groups; GO:0042409 caffeoyl-CoA O-methyltransferase activity;	K00588	E2.1.1.104; caffeoyl-CoA O-methyltransferase [EC:2.1.1.104]	map00940 Phenylpropanoid biosynthesis; map00941 Flavonoid biosynthesis; map00945 Stilbenoid, diarylheptanoid and gingerol biosynthesis; map01100 Metabolic pathways; map01110 Biosynthesis of secondary metabolites	PF01596	O-methyltransferase
TRINITY_DN19045_c0_g1	putative tonoplast intrinsic protein	0.499	Down	0.0051159	---	25.365	1.777	1.377	1.305	0.743	0.843	0.639	0.926	1.125	1.25	0.491	0.646	0.762	vacuolar membrane	GO:0006810 transport; GO:0006811 ion transport; GO:0006833 water transport; GO:0006855 drug transmembrane transport; GO:0006950 response to stress; GO:0006952 defense response; GO:0009605 response to external stimulus; GO:0009607 response to biotic stimulus; GO:0009617 response to bacterium; GO:0015840 urea transport; GO:0015893 drug transport; GO:0019755 one-carbon compound transport; GO:0030104…	GO:0000322 storage vacuole; GO:0000325 plant-type vacuole; GO:0000326 protein storage vacuole; GO:0005576 extracellular region; GO:0005622 intracellular; GO:0005623 cell; GO:0005737 cytoplasm; GO:0005773 vacuole; GO:0005774 vacuolar membrane; GO:0005783 endoplasmic reticulum; GO:0005794 Golgi apparatus; GO:0005886 plasma membrane; GO:0005887 integral component of plasma membrane; GO:0009507 chlor…	GO:0005215 transporter activity; GO:0005372 water transmembrane transporter activity; GO:0015204 urea transmembrane transporter activity; GO:0015250 water channel activity; GO:0015267 channel activity; GO:0015318 inorganic solute uptake transmembrane transporter activity; GO:0022803 passive transmembrane transporter activity; GO:0022838 substrate-specific channel activity; GO:0022857 transmembran…	K09873	TIP; aquaporin TIP
TRINITY_DN34897_c0_g1	60S ribosomal protein L24	0.639	Down	0.0020803	---	18.461	1.309	1.205	1.137	0.736	0.854	0.742	1.122	0.986	1.178	0.835	0.927	0.902	chloroplast				K02896	RP-L24e, RPL24; large subunit ribosomal protein L24e	map03010 Ribosome	PF01246	Ribosomal protein L24e
TRINITY_DN15574_c0_g1	peroxidase 16-like protein	0.446	Down	0.0167968	---	36.084	1.66	1.298	1.471	0.838	0.708	0.43	0.737	1.234	1.564	0.743	0.511	0.444	chloroplast				K00430	E1.11.1.7; peroxidase [EC:1.11.1.7]	map00940 Phenylpropanoid biosynthesis; map01100 Metabolic pathways; map01110 Biosynthesis of secondary metabolites	PF00141	Peroxidase
TRINITY_DN16579_c0_g1	NTH1	0.415	Down	0.02266	---	40.563	1.708	1.373	1.346	0.614	0.856	0.366	0.973	1.302	1.836	0.655	0.337	0.347	extracellular	GO:0006508 proteolysis; GO:0006807 nitrogen compound metabolic process; GO:0008152 metabolic process; GO:0009056 catabolic process; GO:0009057 macromolecule catabolic process; GO:0009987 cellular process; GO:0019538 protein metabolic process; GO:0030163 protein catabolic process; GO:0043170 macromolecule metabolic process; GO:0044237 cellular metabolic process; GO:0044238 primary metabolic proces…	GO:0000323 lytic vacuole; GO:0005576 extracellular region; GO:0005615 extracellular space; GO:0005622 intracellular; GO:0005623 cell; GO:0005737 cytoplasm; GO:0005764 lysosome; GO:0005773 vacuole; GO:0043226 organelle; GO:0043227 membrane-bounded organelle; GO:0043229 intracellular organelle; GO:0043231 intracellular membrane-bounded organelle; GO:0044421 extracellular region part; GO:0044424 int…	GO:0003824 catalytic activity; GO:0004175 endopeptidase activity; GO:0004197 cysteine-type endopeptidase activity; GO:0008233 peptidase activity; GO:0008234 cysteine-type peptidase activity; GO:0016787 hydrolase activity; GO:0070011 peptidase activity, acting on L-amino acid peptides;				PF08246; PF00112	Cathepsin propeptide inhibitor domain (I29); Papain family cysteine protease
TRINITY_DN7969_c0_g1	RecName: Full=Protochlorophyllide reductase, chloroplastic; Short=PCR; AltName: Full=NADPH-protochlorophyllide oxidoreductase; Short=POR; Flags: Precursor	0.214	Down	0.0147969	---	42.913	2.247	1.729		0.368	0.484		1.029	1.332		0.223	0.341		chloroplast	GO:0007275 multicellular organism development; GO:0008152 metabolic process; GO:0009314 response to radiation; GO:0009416 response to light stimulus; GO:0009628 response to abiotic stimulus; GO:0009639 response to red or far red light; GO:0009640 photomorphogenesis; GO:0009642 response to light intensity; GO:0009646 response to absence of light; GO:0009647 skotomorphogenesis; GO:0009719 response …	GO:0005622 intracellular; GO:0005623 cell; GO:0005737 cytoplasm; GO:0009507 chloroplast; GO:0009526 plastid envelope; GO:0009527 plastid outer membrane; GO:0009534 chloroplast thylakoid; GO:0009535 chloroplast thylakoid membrane; GO:0009536 plastid; GO:0009579 thylakoid; GO:0009707 chloroplast outer membrane; GO:0009941 chloroplast envelope; GO:0016020 membrane; GO:0019867 outer membrane; GO:0031…	GO:0003824 catalytic activity; GO:0005488 binding; GO:0005515 protein binding; GO:0016491 oxidoreductase activity; GO:0016627 oxidoreductase activity, acting on the CH-CH group of donors; GO:0016628 oxidoreductase activity, acting on the CH-CH group of donors, NAD or NADP as acceptor; GO:0016630 protochlorophyllide reductase activity; GO:0019904 protein domain specific binding;	K00218	por; protochlorophyllide reductase [EC:1.3.1.33]	map00860 Porphyrin and chlorophyll metabolism; map01100 Metabolic pathways; map01110 Biosynthesis of secondary metabolites	PF00106	short chain dehydrogenase
TRINITY_DN2039_c0_g1	probable methyltransferase PMT14	0.46	Down	0.0103798	---	69.327	1.538		1.423	0.633		0.728	1.072		1.112	0.725		0.683	chloroplast	GO:0008152 metabolic process; GO:0032259 methylation;	GO:0005618 cell wall; GO:0005622 intracellular; GO:0005623 cell; GO:0005737 cytoplasm; GO:0005768 endosome; GO:0005773 vacuole; GO:0005774 vacuolar membrane; GO:0005794 Golgi apparatus; GO:0005802 trans-Golgi network; GO:0009505 plant-type cell wall; GO:0012505 endomembrane system; GO:0016020 membrane; GO:0030312 external encapsulating structure; GO:0031090 organelle membrane; GO:0031410 cytoplas…	GO:0003824 catalytic activity; GO:0008168 methyltransferase activity; GO:0008757 S-adenosylmethionine-dependent methyltransferase activity; GO:0016740 transferase activity; GO:0016741 transferase activity, transferring one-carbon groups;
TRINITY_DN6915_c0_g1	tubulin beta chain	0.456	Down	0.0115825	---	50.697	1.594	1.544	1.539	0.691	0.825	0.615	1.072	1.024	1.1	0.646	0.544	0.71	nucleus	GO:0000902 cell morphogenesis; GO:0006996 organelle organization; GO:0007010 cytoskeleton organization; GO:0007017 microtubule-based process; GO:0009314 response to radiation; GO:0009416 response to light stimulus; GO:0009628 response to abiotic stimulus; GO:0009653 anatomical structure morphogenesis; GO:0009826 unidimensional cell growth; GO:0009987 cellular process; GO:0016043 cellular componen…	GO:0005618 cell wall; GO:0005622 intracellular; GO:0005623 cell; GO:0005737 cytoplasm; GO:0005773 vacuole; GO:0005774 vacuolar membrane; GO:0005856 cytoskeleton; GO:0005886 plasma membrane; GO:0009507 chloroplast; GO:0009532 plastid stroma; GO:0009536 plastid; GO:0009570 chloroplast stroma; GO:0016020 membrane; GO:0030312 external encapsulating structure; GO:0031090 organelle membrane; GO:0032991…	GO:0005198 structural molecule activity; GO:0005200 structural constituent of cytoskeleton;	K07375	TUBB; tubulin beta	map04145 Phagosome	PF00091; PF03953	Tubulin/FtsZ family, GTPase domain; Tubulin C-terminal domain
TRINITY_DN2118_c0_g1	rhamnose biosynthetic-like enzyme	0.457	Down	0.00021545	---	75.492	1.594	1.414	1.539	0.696	0.75	0.632	1.076	1.151	1.057	0.549	0.583	0.703	chloroplast	GO:0006139 nucleobase-containing compound metabolic process; GO:0006725 cellular aromatic compound metabolic process; GO:0006793 phosphorus metabolic process; GO:0006807 nitrogen compound metabolic process; GO:0006810 transport; GO:0008152 metabolic process; GO:0009058 biosynthetic process; GO:0009225 nucleotide-sugar metabolic process; GO:0009226 nucleotide-sugar biosynthetic process; GO:0009812…	GO:0005622 intracellular; GO:0005623 cell; GO:0005737 cytoplasm; GO:0005829 cytosol; GO:0005911 cell-cell junction; GO:0009506 plasmodesma; GO:0030054 cell junction; GO:0044424 intracellular part; GO:0044444 cytoplasmic part; GO:0044464 cell part; GO:0055044 symplast;	GO:0003824 catalytic activity; GO:0010280 UDP-L-rhamnose synthase activity; GO:0016829 lyase activity; GO:0016835 carbon-oxygen lyase activity; GO:0016836 hydro-lyase activity; GO:0050377 UDP-glucose 4,6-dehydratase activity;	K12450	RHM; UDP-glucose 4,6-dehydratase [EC:4.2.1.76]	map00520 Amino sugar and nucleotide sugar metabolism; map01100 Metabolic pathways	PF04321	RmlD substrate binding domain
TRINITY_DN39219_c0_g1	putative histone H2B-like protein	0.577	Down	0.00056007	---	16.151	1.408	1.439	1.249	0.744	0.788	0.833	0.681	0.966	1.176	1.176	0.785	0.709	nucleus				K11252	H2B; histone H2B		PF00125	Core histone H2A/H2B/H3/H4
TRINITY_DN4148_c0_g1	3-phosphoshikimate 1-carboxyvinyltransferase 2	0.516	Down	0.00030013	---	41.708	1.423	1.48	1.387	0.736	0.806	0.67	0.925	1.108	1.18	0.722	0.603	0.649	cytoplasm	GO:0006082 organic acid metabolic process; GO:0008152 metabolic process; GO:0009058 biosynthetic process; GO:0009423 chorismate biosynthetic process; GO:0009987 cellular process; GO:0016053 organic acid biosynthetic process; GO:0019752 carboxylic acid metabolic process; GO:0043436 oxoacid metabolic process; GO:0043648 dicarboxylic acid metabolic process; GO:0043650 dicarboxylic acid biosynthetic …	GO:0005622 intracellular; GO:0005623 cell; GO:0005737 cytoplasm; GO:0009507 chloroplast; GO:0009532 plastid stroma; GO:0009536 plastid; GO:0009570 chloroplast stroma; GO:0043226 organelle; GO:0043227 membrane-bounded organelle; GO:0043229 intracellular organelle; GO:0043231 intracellular membrane-bounded organelle; GO:0044422 organelle part; GO:0044424 intracellular part; GO:0044434 chloroplast p…	GO:0003824 catalytic activity; GO:0003866 3-phosphoshikimate 1-carboxyvinyltransferase activity; GO:0016740 transferase activity; GO:0016765 transferase activity, transferring alkyl or aryl (other than methyl) groups;	K00800	aroA; 3-phosphoshikimate 1-carboxyvinyltransferase [EC:2.5.1.19]	map00400 Phenylalanine, tyrosine and tryptophan biosynthesis; map01100 Metabolic pathways; map01110 Biosynthesis of secondary metabolites; map01230 Biosynthesis of amino acids
TRINITY_DN36703_c0_g1	RecName: Full=ABA-responsive protein ABR17	0.637	Down	0.00022434	---	16.796	1.331	1.431	1.43	0.925	0.901	0.846	0.998	0.904	0.687	0.741	0.742	1.039	cytoplasm							PF00407	Pathogenesis-related protein Bet v I family
TRINITY_DN47830_c0_g1	60S ribosomal protein L37-3	0.581	Down	0.0021038	---	10.707	1.4	1.193	1.225	0.828	0.702	0.687	1.147	1.258	1.395	0.65	0.784	0.649	chloroplast				K02922	RP-L37e, RPL37; large subunit ribosomal protein L37e	map03010 Ribosome
TRINITY_DN2778_c0_g1	diamine oxidase	0.433	Down	0.00048318	---	63.539	1.682	1.561	1.447	0.643	0.616	0.77	0.865	1.237	1.101	0.77	0.509	0.625	cytoskeleton	GO:0008152 metabolic process; GO:0009987 cellular process; GO:0010035 response to inorganic substance; GO:0042221 response to chemical; GO:0050896 response to stimulus; GO:0051716 cellular response to stimulus; GO:0055114 oxidation-reduction process; GO:0070887 cellular response to chemical stimulus; GO:0071241 cellular response to inorganic substance; GO:0097184 response to azide; GO:0097185 cel…		GO:0003824 catalytic activity; GO:0016491 oxidoreductase activity; GO:0016638 oxidoreductase activity, acting on the CH-NH2 group of donors; GO:0016641 oxidoreductase activity, acting on the CH-NH2 group of donors, oxygen as acceptor; GO:0052597 diamine oxidase activity;	K00276	AOC3, AOC2, tynA; primary-amine oxidase [EC:1.4.3.21]	map00260 Glycine, serine and threonine metabolism; map00350 Tyrosine metabolism; map00360 Phenylalanine metabolism; map00410 beta-Alanine metabolism; map00950 Isoquinoline alkaloid biosynthesis; map00960 Tropane, piperidine and pyridine alkaloid biosynthesis; map01100 Metabolic pathways; map01110 Biosynthesis of secondary metabolites	PF02728; PF01179	Copper amine oxidase, N3 domain; Copper amine oxidase, enzyme domain
TRINITY_DN820_c0_g1	phospholipase D alpha 1-like protein	0.498	Down	0.0003599	---	91.775	1.544	1.422	1.39	0.801	0.672	0.697	1.01	1.193	1.204	0.74	0.65	0.652	cytoplasm		GO:0005622 intracellular; GO:0005623 cell; GO:0005737 cytoplasm; GO:0005773 vacuole; GO:0005783 endoplasmic reticulum; GO:0005886 plasma membrane; GO:0009536 plastid; GO:0012505 endomembrane system; GO:0016020 membrane; GO:0043226 organelle; GO:0043227 membrane-bounded organelle; GO:0043229 intracellular organelle; GO:0043231 intracellular membrane-bounded organelle; GO:0044424 intracellular part…		K01115	PLD1_2; phospholipase D1/2 [EC:3.1.4.4]	map00564 Glycerophospholipid metabolism; map00565 Ether lipid metabolism; map01100 Metabolic pathways; map01110 Biosynthesis of secondary metabolites; map04144 Endocytosis	PF00168	C2 domain
TRINITY_DN759_c0_g1	probable acyl-CoA dehydrogenase IBR3	0.657	Down	0.0022814	---	90.472	1.425	1.331	1.456	0.992	0.948	0.827	0.783	0.995	0.861	0.852	0.762	0.829	nucleus	GO:0006082 organic acid metabolic process; GO:0006629 lipid metabolic process; GO:0006631 fatty acid metabolic process; GO:0006635 fatty acid beta-oxidation; GO:0007275 multicellular organism development; GO:0008152 metabolic process; GO:0009056 catabolic process; GO:0009062 fatty acid catabolic process; GO:0009653 anatomical structure morphogenesis; GO:0009888 tissue development; GO:0009987 cell…		GO:0000166 nucleotide binding; GO:0003824 catalytic activity; GO:0003995 acyl-CoA dehydrogenase activity; GO:0005488 binding; GO:0016491 oxidoreductase activity; GO:0016627 oxidoreductase activity, acting on the CH-CH group of donors; GO:0036094 small molecule binding; GO:0043167 ion binding; GO:0043168 anion binding; GO:0048037 cofactor binding; GO:0050660 flavin adenine dinucleotide binding; GO…	K00249	ACADM, acd; acyl-CoA dehydrogenase [EC:1.3.8.7]	map00071 Fatty acid degradation; map00280 Valine, leucine and isoleucine degradation; map01100 Metabolic pathways; map01110 Biosynthesis of secondary metabolites; map01212 Fatty acid metabolism	PF02771; PF02770; PF00441	Acyl-CoA dehydrogenase, N-terminal domain; Acyl-CoA dehydrogenase, middle domain; Acyl-CoA dehydrogenase, C-terminal domain
TRINITY_DN9593_c0_g1	phosphoserine aminotransferase chloroplastic-like	0.61	Down	0.026357	---	36.627	1.289	1.315	1.284	0.781	0.909	0.683	1.08	1.037	1.207	0.825	0.702	0.753	cytoplasm	GO:0000003 reproduction; GO:0003006 developmental process involved in reproduction; GO:0006082 organic acid metabolic process; GO:0006520 cellular amino acid metabolic process; GO:0006563 L-serine metabolic process; GO:0006564 L-serine biosynthetic process; GO:0006793 phosphorus metabolic process; GO:0006796 phosphate-containing compound metabolic process; GO:0006807 nitrogen compound metabolic p…	GO:0005622 intracellular; GO:0005623 cell; GO:0005737 cytoplasm; GO:0009507 chloroplast; GO:0009532 plastid stroma; GO:0009534 chloroplast thylakoid; GO:0009536 plastid; GO:0009570 chloroplast stroma; GO:0009579 thylakoid; GO:0031976 plastid thylakoid; GO:0031984 organelle subcompartment; GO:0043226 organelle; GO:0043227 membrane-bounded organelle; GO:0043229 intracellular organelle; GO:0043231 i…	GO:0000287 magnesium ion binding; GO:0003824 catalytic activity; GO:0004647 phosphoserine phosphatase activity; GO:0004648 O-phospho-L-serine:2-oxoglutarate aminotransferase activity; GO:0005488 binding; GO:0005509 calcium ion binding; GO:0008483 transaminase activity; GO:0016740 transferase activity; GO:0016769 transferase activity, transferring nitrogenous groups; GO:0016787 hydrolase activity;…	K00831	serC, PSAT1; phosphoserine aminotransferase [EC:2.6.1.52]	map00260 Glycine, serine and threonine metabolism; map00270 Cysteine and methionine metabolism; map00750 Vitamin B6 metabolism; map01100 Metabolic pathways; map01200 Carbon metabolism; map01230 Biosynthesis of amino acids	PF00266	Aminotransferase class-V
TRINITY_DN16192_c0_g1	vestitone reductase isoform X2	0.637	Down	0.0124577	---	36.35	1.48	1.315	1.052	0.783	0.839	0.828	1.044	1.14	1.111	0.678	0.63	1.024	chloroplast				K13265	VR; vestitone reductase [EC:1.1.1.348]	map00943 Isoflavonoid biosynthesis; map01110 Biosynthesis of secondary metabolites
TRINITY_DN33125_c0_g1	pathogenesis-related protein 10a	0.183	Down	8.4908e-05	---	17.823	2.242	1.951	2.147	0.451	0.39	0.321	0.776	1.227	1.08	0.406	0.26	0.307	cytoplasm							PF00407	Pathogenesis-related protein Bet v I family
TRINITY_DN5056_c0_g1	uncharacterized acetyltransferase At3g50280	0.635	Down	0.0125598	---	53.816		1.342	1.448		0.856	0.917		1.073	0.878		0.707	0.721	chloroplast	GO:0000902 cell morphogenesis; GO:0000904 cell morphogenesis involved in differentiation; GO:0008152 metabolic process; GO:0009058 biosynthetic process; GO:0009059 macromolecule biosynthetic process; GO:0009653 anatomical structure morphogenesis; GO:0009888 tissue development; GO:0009987 cellular process; GO:0010026 trichome differentiation; GO:0010090 trichome morphogenesis; GO:0010143 cutin bio…	GO:0005622 intracellular; GO:0005623 cell; GO:0005737 cytoplasm; GO:0044424 intracellular part; GO:0044464 cell part;
TRINITY_DN8848_c0_g1	putative ras-GTPase-activating protein SH3-domain binding protein	0.586	Down	0.00189515	---	52.841	1.309	1.337	1.442	0.84	0.86	0.694	1.014	1.116	1.153	0.722	0.822	0.634	chloroplast							PF02136; PF00076	Nuclear transport factor 2 (NTF2) domain; RNA recognition motif. (a.k.a. RRM, RBD, or RNP domain)
TRINITY_DN20875_c0_g1	1-aminocyclopropane-1-carboxylate oxidase 1-like protein	0.638	Down	0.0092623	---	34.273	1.255	1.429	1.582	0.902	0.802	1.016	1.307	1.197	0.706	0.582	0.52	0.507	cytoplasm	GO:0000302 response to reactive oxygen species; GO:0001101 response to acid chemical; GO:0006950 response to stress; GO:0006979 response to oxidative stress; GO:0007154 cell communication; GO:0009267 cellular response to starvation; GO:0009605 response to external stimulus; GO:0009987 cellular process; GO:0009991 response to extracellular stimulus; GO:0010033 response to organic substance; GO:001…			K05933	E1.14.17.4; aminocyclopropanecarboxylate oxidase [EC:1.14.17.4]	map00270 Cysteine and methionine metabolism; map01100 Metabolic pathways; map01110 Biosynthesis of secondary metabolites	PF03171	2OG-Fe(II) oxygenase superfamily
TRINITY_DN1185_c0_g1	subtilisin-like protease-like protein	0.563	Down	0.00016022	---	79.358	1.466	1.443	1.43	0.776	0.883	0.786	0.943	1.13	1.088	0.708	0.534	0.61	extracellular	GO:0000003 reproduction; GO:0003006 developmental process involved in reproduction; GO:0006508 proteolysis; GO:0006807 nitrogen compound metabolic process; GO:0007275 multicellular organism development; GO:0008152 metabolic process; GO:0009791 post-embryonic development; GO:0009845 seed germination; GO:0009987 cellular process; GO:0010154 fruit development; GO:0010191 mucilage metabolic process; …	GO:0005576 extracellular region; GO:0005618 cell wall; GO:0005623 cell; GO:0009505 plant-type cell wall; GO:0030312 external encapsulating structure; GO:0044464 cell part; GO:0048046 apoplast; GO:0071944 cell periphery;	GO:0003824 catalytic activity; GO:0004175 endopeptidase activity; GO:0004252 serine-type endopeptidase activity; GO:0008233 peptidase activity; GO:0008236 serine-type peptidase activity; GO:0016787 hydrolase activity; GO:0017171 serine hydrolase activity; GO:0070011 peptidase activity, acting on L-amino acid peptides;				PF05922; PF00082	Peptidase inhibitor I9; Subtilase family
TRINITY_DN5551_c0_g1	allene oxide synthase 1, chloroplastic	0.431	Down	0.00178195	---	53.979	1.746	1.364	1.481	0.603	0.781	0.597	0.905	1.215	1.212	0.679	0.547	0.651	cytoplasm	GO:0006629 lipid metabolic process; GO:0008152 metabolic process; GO:0008202 steroid metabolic process; GO:0016125 sterol metabolic process; GO:0044238 primary metabolic process; GO:0055114 oxidation-reduction process; GO:0071704 organic substance metabolic process; GO:1901360 organic cyclic compound metabolic process; GO:1901615 organic hydroxy compound metabolic process;		GO:0003824 catalytic activity; GO:0004497 monooxygenase activity; GO:0016491 oxidoreductase activity;	K01723	AOS; hydroperoxide dehydratase [EC:4.2.1.92]	map00592 alpha-Linolenic acid metabolism; map01100 Metabolic pathways; map01110 Biosynthesis of secondary metabolites	PF00067	Cytochrome P450
TRINITY_DN33708_c0_g1	chalcone-flavanone isomerase	0.343	Down	0.020495	---	24.873	2.042	0.826	1.433	0.497	0.543	0.435	0.668	2.133	0.926	0.709	0.426	1.221	cytoplasm	GO:0008152 metabolic process; GO:0009058 biosynthetic process; GO:0009628 response to abiotic stimulus; GO:0009812 flavonoid metabolic process; GO:0009813 flavonoid biosynthetic process; GO:0050896 response to stimulus; GO:0071704 organic substance metabolic process; GO:0080167 response to karrikin; GO:1901576 organic substance biosynthetic process;	GO:0005622 intracellular; GO:0005623 cell; GO:0005737 cytoplasm; GO:0005783 endoplasmic reticulum; GO:0012505 endomembrane system; GO:0043226 organelle; GO:0043227 membrane-bounded organelle; GO:0043229 intracellular organelle; GO:0043231 intracellular membrane-bounded organelle; GO:0044424 intracellular part; GO:0044444 cytoplasmic part; GO:0044464 cell part;	GO:0003824 catalytic activity; GO:0016853 isomerase activity; GO:0016872 intramolecular lyase activity; GO:0045430 chalcone isomerase activity;	K01859	E5.5.1.6; chalcone isomerase [EC:5.5.1.6]	map00941 Flavonoid biosynthesis; map01100 Metabolic pathways; map01110 Biosynthesis of secondary metabolites	PF02431	Chalcone-flavanone isomerase
TRINITY_DN35534_c0_g1	RecName: Full=ABA-responsive protein ABR18	0.572	Down	0.029515	---	16.957	0.751	0.78	1.027	0.372	0.603	0.489	1.712	1.109	0.98	1.097	1.432	1.479	cytoplasm							PF00407	Pathogenesis-related protein Bet v I family
TRINITY_DN9924_c0_g1	tubulin alpha-2 chain	0.625	Down	0.0055841	---	49.499	1.473	1.491	1.412	1.031	0.936	0.769	0.807	1.143	1.15	0.699	0.378	0.613	cytoplasm				K07374	TUBA; tubulin alpha	map04145 Phagosome	PF00091; PF03953	Tubulin/FtsZ family, GTPase domain; Tubulin C-terminal domain
TRINITY_DN7116_c0_g1	UDP-glucuronic acid decarboxylase 2	0.641	Down	0.00052212	---	49.198	1.273	1.37	1.309	0.908	0.824	0.8	0.962	1.148	1.101	0.879	0.637	0.853	nucleus	GO:0005975 carbohydrate metabolic process; GO:0005996 monosaccharide metabolic process; GO:0006139 nucleobase-containing compound metabolic process; GO:0006725 cellular aromatic compound metabolic process; GO:0006807 nitrogen compound metabolic process; GO:0008152 metabolic process; GO:0009058 biosynthetic process; GO:0009225 nucleotide-sugar metabolic process; GO:0009226 nucleotide-sugar biosynt…	GO:0000139 Golgi membrane; GO:0005622 intracellular; GO:0005623 cell; GO:0005737 cytoplasm; GO:0005768 endosome; GO:0005794 Golgi apparatus; GO:0005802 trans-Golgi network; GO:0005886 plasma membrane; GO:0012505 endomembrane system; GO:0016020 membrane; GO:0031090 organelle membrane; GO:0031410 cytoplasmic vesicle; GO:0031982 vesicle; GO:0031984 organelle subcompartment; GO:0043226 organelle; GO:…	GO:0000166 nucleotide binding; GO:0003824 catalytic activity; GO:0005488 binding; GO:0008460 dTDP-glucose 4,6-dehydratase activity; GO:0016829 lyase activity; GO:0016830 carbon-carbon lyase activity; GO:0016831 carboxy-lyase activity; GO:0016835 carbon-oxygen lyase activity; GO:0016836 hydro-lyase activity; GO:0036094 small molecule binding; GO:0043167 ion binding; GO:0043168 anion binding; GO:00…	K08678	UXS1, uxs; UDP-glucuronate decarboxylase [EC:4.1.1.35]	map00520 Amino sugar and nucleotide sugar metabolism; map01100 Metabolic pathways
TRINITY_DN10834_c0_g1	aspartyl protease AED3-like protein	0.6	Down	0.002384	---	47.655	1.494	1.734	1.471	1.042	0.881	0.898	0.861	0.922	0.986	0.576	0.462	0.619	vacuolar membrane
TRINITY_DN31773_c0_g1	hypothetical protein TSUD_177440	0.573	Down	0.00141812	---	25.8	1.553	1.463	1.804	0.972	0.922	0.867	1.034	1.126	0.688	0.428	0.415	0.577	chloroplast				K00799	GST, gst; glutathione S-transferase [EC:2.5.1.18]	map00480 Glutathione metabolism; map01100 Metabolic pathways	PF02798; PF00043	Glutathione S-transferase, N-terminal domain; Glutathione S-transferase, C-terminal domain
TRINITY_DN12102_c0_g1	peroxidase	0.276	Down	8.363e-05	---	35.026	1.937	1.783	2.052	0.597	0.525	0.47	0.851	1.089	1.023	0.5	0.514	0.411	chloroplast	GO:0006950 response to stress; GO:0006970 response to osmotic stress; GO:0009628 response to abiotic stimulus; GO:0009651 response to salt stress; GO:0050896 response to stimulus;	GO:0005622 intracellular; GO:0005623 cell; GO:0005737 cytoplasm; GO:0044424 intracellular part; GO:0044464 cell part;		K00430	E1.11.1.7; peroxidase [EC:1.11.1.7]	map00940 Phenylpropanoid biosynthesis; map01100 Metabolic pathways; map01110 Biosynthesis of secondary metabolites	PF00141	Peroxidase
TRINITY_DN29767_c0_g1	UMP-CMP kinase 3	0.648	Down	0.027777	---	23.111	1.412	1.338	1.56	1.022	1.056	0.717	1.007	1.015	1.112	0.564	0.578	0.531	cytoplasm	GO:0006139 nucleobase-containing compound metabolic process; GO:0006220 pyrimidine nucleotide metabolic process; GO:0006221 pyrimidine nucleotide biosynthetic process; GO:0006725 cellular aromatic compound metabolic process; GO:0006753 nucleoside phosphate metabolic process; GO:0006793 phosphorus metabolic process; GO:0006796 phosphate-containing compound metabolic process; GO:0006807 nitrogen co…	GO:0005576 extracellular region; GO:0005622 intracellular; GO:0005623 cell; GO:0005737 cytoplasm; GO:0005829 cytosol; GO:0044424 intracellular part; GO:0044444 cytoplasmic part; GO:0044464 cell part; GO:0048046 apoplast;	GO:0000166 nucleotide binding; GO:0003824 catalytic activity; GO:0004127 cytidylate kinase activity; GO:0005488 binding; GO:0005524 ATP binding; GO:0008144 drug binding; GO:0009041 uridylate kinase activity; GO:0016301 kinase activity; GO:0016740 transferase activity; GO:0016772 transferase activity, transferring phosphorus-containing groups; GO:0016776 phosphotransferase activity, phosphate grou…	K13800	CMPK1, UMPK; UMP-CMP kinase [EC:2.7.4.14]	map00240 Pyrimidine metabolism; map01100 Metabolic pathways	PF00406	Adenylate kinase
TRINITY_DN12456_c0_g1	patatin-like protein 1	0.235	Down	1.94001e-05	---	46.265	2.138	1.743	1.867	0.445	0.446	0.46	0.805	1.412	1.217	0.41	0.484	0.314	extracellular
TRINITY_DN38743_c0_g1	hypothetical protein TSUD_220570	0.629	Down	0.00161788	---	17.274	1.546	1.487	1.299	0.858	0.952	0.915	0.88	1.088	1.071	0.704	0.436	0.685	cytoplasm		GO:0016020 membrane;					PF00407	Pathogenesis-related protein Bet v I family
TRINITY_DN1070_c0_g1	RecName: Full=Sucrose synthase; AltName: Full=Sucrose-UDP glucosyltransferase	0.544	Down	0.0021419	---	38.878	1.208	1.508	1.322	0.777	0.768	0.65	1.188	1.023	1.138	0.815	0.673	0.712	cytoplasm,nucleus				K00695	E2.4.1.13; sucrose synthase [EC:2.4.1.13]	map00500 Starch and sucrose metabolism; map01100 Metabolic pathways
TRINITY_DN12188_c0_g1	actin isoform 3-1	0.582	Down	0.02434	---	41.71	1.527	1.054	1.483	0.7	0.944	0.723	0.92	1.064	1.096	0.833	0.96	0.634	cytoskeleton				K10355	ACTF; actin, other eukaryote
TRINITY_DN23700_c0_g1	hypothetical protein TSUD_233150	0.661	Down	0.0058178	---	29.928	0.935	0.881	1.083	0.613	0.605	0.699	0.917	1.414	1.246	1.585	1.099	0.975	chloroplast				K02987	RP-S4e, RPS4; small subunit ribosomal protein S4e	map03010 Ribosome	PF08071; PF01479	RS4NT (NUC023) domain; S4 domain
TRINITY_DN3920_c0_g1	L-ascorbate oxidase homolog	0.535	Down	0.00054125	---	51.218	1.666	1.37	1.545	0.795	0.856	0.799	0.984	1.07	0.972	0.513	0.697	0.62	chloroplast							PF00394; PF07731	Multicopper oxidase; Multicopper oxidase
TRINITY_DN867_c0_g1	putative DNA (cytosine-5)-methyltransferase CMT1	0.314	Down	0.0068806	---	94.923	2.131	1.78	1.629	0.425	0.855	0.458	0.936	0.991	1.389	0.436	0.354	0.381	nucleus	GO:0009292 genetic transfer; GO:0009294 DNA mediated transformation; GO:0009987 cellular process; GO:0044764 multi-organism cellular process; GO:0051704 multi-organism process;			K00558	DNMT1, dcm; DNA (cytosine-5)-methyltransferase 1 [EC:2.1.1.37]	map00270 Cysteine and methionine metabolism; map01100 Metabolic pathways	PF01426; PF00385; PF00145	BAH domain; Chromo (CHRromatin Organisation MOdifier) domain; C-5 cytosine-specific DNA methylase
TRINITY_DN15765_c0_g1	cinnamoyl-CoA reductase 1	0.511	Down	0.013482	---	41.292	1.225	1.514	1.707	0.93	0.747	0.597	0.932	1.014	0.907	0.943	0.686	0.704	chloroplast	GO:0006725 cellular aromatic compound metabolic process; GO:0006950 response to stress; GO:0007623 circadian rhythm; GO:0008152 metabolic process; GO:0009058 biosynthetic process; GO:0009266 response to temperature stimulus; GO:0009409 response to cold; GO:0009628 response to abiotic stimulus; GO:0009698 phenylpropanoid metabolic process; GO:0009699 phenylpropanoid biosynthetic process; GO:000980…	GO:0005622 intracellular; GO:0005623 cell; GO:0005737 cytoplasm; GO:0005829 cytosol; GO:0044424 intracellular part; GO:0044444 cytoplasmic part; GO:0044464 cell part;	GO:0003824 catalytic activity; GO:0016491 oxidoreductase activity; GO:0016620 oxidoreductase activity, acting on the aldehyde or oxo group of donors, NAD or NADP as acceptor; GO:0016621 cinnamoyl-CoA reductase activity; GO:0016903 oxidoreductase activity, acting on the aldehyde or oxo group of donors;	K09753	CCR; cinnamoyl-CoA reductase [EC:1.2.1.44]	map00940 Phenylpropanoid biosynthesis; map01100 Metabolic pathways; map01110 Biosynthesis of secondary metabolites
TRINITY_DN1127_c0_g1	putative galactinol-sucrose galactosyltransferase 6-like protein, partial	0.526	Down	1.69566e-05	---	12.995	1.557	1.431	1.487	0.777	0.793	0.785	1.183	1.285	1.236	0.521	0.434	0.505	chloroplast				K06617	E2.4.1.82; raffinose synthase [EC:2.4.1.82]	map00052 Galactose metabolism; map01100 Metabolic pathways
TRINITY_DN13818_c0_g1	basic 7S globulin	0.497	Down	0.028097	---	49.278	1.481	1.703		0.715	0.869		1.046	0.799		0.74	0.593		extracellular
TRINITY_DN1477_c0_g1	probable acyl-activating enzyme 18, peroxisomal	0.615	Down	0.00053758	---	68.642	1.215	1.236		0.748	0.759		1.122	1.309		0.928	0.658		endoplasmic reticulum	GO:0008152 metabolic process; GO:0009850 auxin metabolic process; GO:0009987 cellular process; GO:0010817 regulation of hormone levels; GO:0042445 hormone metabolic process; GO:0044237 cellular metabolic process; GO:0065007 biological regulation; GO:0065008 regulation of biological quality;	GO:0005622 intracellular; GO:0005623 cell; GO:0005737 cytoplasm; GO:0005777 peroxisome; GO:0042579 microbody; GO:0043226 organelle; GO:0043227 membrane-bounded organelle; GO:0043229 intracellular organelle; GO:0043231 intracellular membrane-bounded organelle; GO:0044424 intracellular part; GO:0044444 cytoplasmic part; GO:0044464 cell part;					PF13193	Domain of unknown function (DUF4009)
TRINITY_DN8639_c0_g1	tubulin beta chain, partial	0.525	Down	0.0049579	---	52.949	1.807	1.455	1.562	0.978	0.853	0.701	0.769	1.094	0.972	0.488	0.59	0.711	chloroplast	GO:0006950 response to stress; GO:0006970 response to osmotic stress; GO:0006996 organelle organization; GO:0007010 cytoskeleton organization; GO:0007017 microtubule-based process; GO:0009266 response to temperature stimulus; GO:0009409 response to cold; GO:0009628 response to abiotic stimulus; GO:0009651 response to salt stress; GO:0009987 cellular process; GO:0016043 cellular component organiza…	GO:0005622 intracellular; GO:0005623 cell; GO:0005856 cytoskeleton; GO:0005886 plasma membrane; GO:0015630 microtubule cytoskeleton; GO:0016020 membrane; GO:0043226 organelle; GO:0043228 non-membrane-bounded organelle; GO:0043229 intracellular organelle; GO:0043232 intracellular non-membrane-bounded organelle; GO:0044424 intracellular part; GO:0044464 cell part; GO:0071944 cell periphery;	GO:0005198 structural molecule activity; GO:0005200 structural constituent of cytoskeleton;	K07375	TUBB; tubulin beta	map04145 Phagosome	PF00091; PF03953	Tubulin/FtsZ family, GTPase domain; Tubulin C-terminal domain
TRINITY_DN8555_c0_g1	mitochondrial phosphate carrier protein 3, mitochondrial	0.649	Down	0.0109558	---	38.751	1.458	1.204	1.352	0.867	0.988	0.75	0.962	0.981	1.096	0.688	0.805	0.781	chloroplast				K15102	SLC25A3, PHC, PIC; solute carrier family 25 (mitochondrial phosphate transporter), member 3
TRINITY_DN1205_c0_g1	DNA replication licensing factor MCM3	0.577	Down	0.040517	---	85.681	1.493	1.392		0.742	0.924		1.166	1.113		0.575	0.538		cytoplasm	GO:0006139 nucleobase-containing compound metabolic process; GO:0006259 DNA metabolic process; GO:0006260 DNA replication; GO:0006261 DNA-dependent DNA replication; GO:0006268 DNA unwinding involved in DNA replication; GO:0006725 cellular aromatic compound metabolic process; GO:0006807 nitrogen compound metabolic process; GO:0006996 organelle organization; GO:0008152 metabolic process; GO:0009058…	GO:0000347 THO complex; GO:0005622 intracellular; GO:0005623 cell; GO:0005634 nucleus; GO:0032991 macromolecular complex; GO:0043226 organelle; GO:0043227 membrane-bounded organelle; GO:0043229 intracellular organelle; GO:0043231 intracellular membrane-bounded organelle; GO:0044422 organelle part; GO:0044424 intracellular part; GO:0044428 nuclear part; GO:0044446 intracellular organelle part; GO:…		K02541	MCM3; DNA replication licensing factor MCM3 [EC:3.6.4.12]	map03030 DNA replication	PF00493	MCM2/3/5 family
TRINITY_DN993_c0_g1	ribonucleoside-diphosphate reductase large subunit	0.483	Down	0.035243	---	75.786	1.685	1.168	1.561	0.529	1.044	0.561	1.137	1.177	1.11	0.59	0.549	0.728	chloroplast	GO:0006139 nucleobase-containing compound metabolic process; GO:0006259 DNA metabolic process; GO:0006260 DNA replication; GO:0006725 cellular aromatic compound metabolic process; GO:0006753 nucleoside phosphate metabolic process; GO:0006793 phosphorus metabolic process; GO:0006796 phosphate-containing compound metabolic process; GO:0006807 nitrogen compound metabolic process; GO:0008152 metaboli…		GO:0003824 catalytic activity; GO:0004748 ribonucleoside-diphosphate reductase activity, thioredoxin disulfide as acceptor; GO:0016491 oxidoreductase activity; GO:0016725 oxidoreductase activity, acting on CH or CH2 groups; GO:0016728 oxidoreductase activity, acting on CH or CH2 groups, disulfide as acceptor; GO:0061731 ribonucleoside-diphosphate reductase activity;	K10807	RRM1; ribonucleoside-diphosphate reductase subunit M1 [EC:1.17.4.1]	map00230 Purine metabolism; map00240 Pyrimidine metabolism; map00480 Glutathione metabolism; map01100 Metabolic pathways	PF03477; PF00317	ATP cone domain; Ribonucleotide reductase, all-alpha domain
TRINITY_DN22817_c0_g1	extradiol ring-cleavage dioxygenase	0.528	Down	0.029557	---	20.954	1.223		1.33	0.604		0.745	1.117		1.006	1.061		0.894	cytoplasm				K15777	DOPA; 4,5-DOPA dioxygenase extradiol [EC:1.13.11.-]	map00965 Betalain biosynthesis	PF02900	Catalytic LigB subunit of aromatic ring-opening dioxygenase
TRINITY_DN10264_c0_g1	RecName: Full=Delta-aminolevulinic acid dehydratase, chloroplastic; Short=ALADH; AltName: Full=Porphobilinogen synthase; Flags: Precursor	0.66	Down	0.0025371	---	45.326	1.399	1.345		0.899	0.912		0.999	1.03		0.707	0.697		chloroplast	GO:0006725 cellular aromatic compound metabolic process; GO:0006778 porphyrin-containing compound metabolic process; GO:0006779 porphyrin-containing compound biosynthetic process; GO:0006783 heme biosynthetic process; GO:0006807 nitrogen compound metabolic process; GO:0008152 metabolic process; GO:0009058 biosynthetic process; GO:0009987 cellular process; GO:0018130 heterocycle biosynthetic proce…	GO:0005622 intracellular; GO:0005623 cell; GO:0005737 cytoplasm; GO:0005829 cytosol; GO:0009507 chloroplast; GO:0009532 plastid stroma; GO:0009536 plastid; GO:0009570 chloroplast stroma; GO:0043226 organelle; GO:0043227 membrane-bounded organelle; GO:0043229 intracellular organelle; GO:0043231 intracellular membrane-bounded organelle; GO:0044422 organelle part; GO:0044424 intracellular part; GO:0…	GO:0003824 catalytic activity; GO:0004655 porphobilinogen synthase activity; GO:0005488 binding; GO:0008270 zinc ion binding; GO:0016829 lyase activity; GO:0016835 carbon-oxygen lyase activity; GO:0016836 hydro-lyase activity; GO:0043167 ion binding; GO:0043169 cation binding; GO:0046872 metal ion binding; GO:0046914 transition metal ion binding;	K01698	hemB, ALAD; porphobilinogen synthase [EC:4.2.1.24]	map00860 Porphyrin and chlorophyll metabolism; map01100 Metabolic pathways; map01110 Biosynthesis of secondary metabolites	PF00490	Delta-aminolevulinic acid dehydratase
TRINITY_DN18251_c0_g1	hypothetical protein TSUD_214340	0.257	Down	0.0034412	---	34.973		1.731	1.999		0.496	0.463		1.191	0.926		0.487	0.472	chloroplast				K00430	E1.11.1.7; peroxidase [EC:1.11.1.7]	map00940 Phenylpropanoid biosynthesis; map01100 Metabolic pathways; map01110 Biosynthesis of secondary metabolites	PF00141	Peroxidase
TRINITY_DN3644_c0_g1	transmembrane 9 superfamily member 3	0.545	Down	0.0031034	---	68.563	1.476	1.246	1.327	0.766	0.817	0.622	0.958	1.169	1.12	0.789	0.743	0.8	plasma membrane	GO:0002790 peptide secretion; GO:0006810 transport; GO:0006897 endocytosis; GO:0006909 phagocytosis; GO:0007154 cell communication; GO:0007155 cell adhesion; GO:0007165 signal transduction; GO:0008104 protein localization; GO:0008283 cell proliferation; GO:0009306 protein secretion; GO:0009987 cellular process; GO:0015031 protein transport; GO:0015833 peptide transport; GO:0016192 vesicle-mediate…	GO:0005623 cell; GO:0005886 plasma membrane; GO:0005887 integral component of plasma membrane; GO:0016020 membrane; GO:0016021 integral component of membrane; GO:0031224 intrinsic component of membrane; GO:0031226 intrinsic component of plasma membrane; GO:0044425 membrane part; GO:0044459 plasma membrane part; GO:0044464 cell part; GO:0071944 cell periphery;	GO:0004888 transmembrane signaling receptor activity; GO:0038023 signaling receptor activity; GO:0060089 molecular transducer activity;	K17085	TM9SF1; transmembrane 9 superfamily member 1
TRINITY_DN7534_c0_g1	pyruvate dehydrogenase E1 component subunit alpha-3, chloroplastic	0.661	Down	0.025436	---	47.125	1.36	1.111	1.202	0.648	0.899	0.881	0.958	1.088	1.068	1.029	0.912	0.839	chloroplast		GO:0005622 intracellular; GO:0005623 cell; GO:0005737 cytoplasm; GO:0009507 chloroplast; GO:0009526 plastid envelope; GO:0009532 plastid stroma; GO:0009536 plastid; GO:0009570 chloroplast stroma; GO:0009941 chloroplast envelope; GO:0031967 organelle envelope; GO:0031975 envelope; GO:0043226 organelle; GO:0043227 membrane-bounded organelle; GO:0043229 intracellular organelle; GO:0043231 intracellu…		K00161	PDHA, pdhA; pyruvate dehydrogenase E1 component alpha subunit [EC:1.2.4.1]	map00010 Glycolysis / Gluconeogenesis; map00020 Citrate cycle (TCA cycle); map00620 Pyruvate metabolism; map01100 Metabolic pathways; map01110 Biosynthesis of secondary metabolites; map01200 Carbon metabolism
TRINITY_DN12264_c0_g1	putative S-adenosyl-L-methionine:salicylic acid carboxyl methyltransferase	0.588	Down	0.0025204	---	40.127	1.417	1.307	1.555	0.808	0.94	0.767	1.152	1.058	0.922	0.516	0.628	0.726	cytoskeleton				K21483	SAMT; salicylate 1-O-methyltransferase [EC:2.1.1.274]
TRINITY_DN17297_c0_g1	cell division control protein 2 c-like	0.665	Down	8.3333e-05	---	35.226	1.35	1.278	1.313	0.84	0.897	0.883	0.901	1.043	1.128	0.921	0.774	0.64	cytoplasm	GO:0000003 reproduction; GO:0000082 G1/S transition of mitotic cell cycle; GO:0000278 mitotic cell cycle; GO:0000902 cell morphogenesis; GO:0003006 developmental process involved in reproduction; GO:0006139 nucleobase-containing compound metabolic process; GO:0006259 DNA metabolic process; GO:0006260 DNA replication; GO:0006261 DNA-dependent DNA replication; GO:0006275 regulation of DNA replicati…	GO:0000307 cyclin-dependent protein kinase holoenzyme complex; GO:0005622 intracellular; GO:0005623 cell; GO:0005634 nucleus; GO:0005737 cytoplasm; GO:0032991 macromolecular complex; GO:0043226 organelle; GO:0043227 membrane-bounded organelle; GO:0043229 intracellular organelle; GO:0043231 intracellular membrane-bounded organelle; GO:0044424 intracellular part; GO:0044464 cell part; GO:0061695 tr…	GO:0003824 catalytic activity; GO:0004672 protein kinase activity; GO:0004674 protein serine/threonine kinase activity; GO:0004693 cyclin-dependent protein serine/threonine kinase activity; GO:0005488 binding; GO:0005515 protein binding; GO:0016301 kinase activity; GO:0016740 transferase activity; GO:0016772 transferase activity, transferring phosphorus-containing groups; GO:0016773 phosphotransf…	K07760	CDK; cyclin-dependent kinase [EC:2.7.11.22]		PF00069	Protein kinase domain
TRINITY_DN22230_c0_g1	arginase 1, mitochondrial	0.628	Down	0.0072751	---	36.571	1.241	1.316	1.104	0.784	0.857	0.659	1.191	1.175	1.444	0.747	0.672	0.782	mitochondria	GO:0006082 organic acid metabolic process; GO:0006520 cellular amino acid metabolic process; GO:0006525 arginine metabolic process; GO:0006527 arginine catabolic process; GO:0006560 proline metabolic process; GO:0006570 tyrosine metabolic process; GO:0006576 cellular biogenic amine metabolic process; GO:0006591 ornithine metabolic process; GO:0006595 polyamine metabolic process; GO:0006596 polyam…	GO:0005622 intracellular; GO:0005623 cell; GO:0005737 cytoplasm; GO:0005739 mitochondrion; GO:0009507 chloroplast; GO:0009532 plastid stroma; GO:0009536 plastid; GO:0009570 chloroplast stroma; GO:0043226 organelle; GO:0043227 membrane-bounded organelle; GO:0043229 intracellular organelle; GO:0043231 intracellular membrane-bounded organelle; GO:0044422 organelle part; GO:0044424 intracellular part…	GO:0003824 catalytic activity; GO:0004053 arginase activity; GO:0005488 binding; GO:0008783 agmatinase activity; GO:0016787 hydrolase activity; GO:0016810 hydrolase activity, acting on carbon-nitrogen (but not peptide) bonds; GO:0016813 hydrolase activity, acting on carbon-nitrogen (but not peptide) bonds, in linear amidines; GO:0043167 ion binding; GO:0043169 cation binding; GO:0046872 metal ion…	K01476	E3.5.3.1, rocF, arg; arginase [EC:3.5.3.1]	map00220 Arginine biosynthesis; map00330 Arginine and proline metabolism; map01100 Metabolic pathways; map01110 Biosynthesis of secondary metabolites; map01230 Biosynthesis of amino acids	PF00491	Arginase family
TRINITY_DN1723_c0_g1	probable methyltransferase PMT8	0.473	Down	0.0037764	---	69.915	1.379	1.35	1.349	0.614	0.612	0.703	1.173	1.343	1.14	0.831	0.61	0.774	chloroplast	GO:0008152 metabolic process; GO:0032259 methylation;	GO:0005622 intracellular; GO:0005623 cell; GO:0005634 nucleus; GO:0005737 cytoplasm; GO:0005768 endosome; GO:0005773 vacuole; GO:0005774 vacuolar membrane; GO:0005794 Golgi apparatus; GO:0005802 trans-Golgi network; GO:0005911 cell-cell junction; GO:0009506 plasmodesma; GO:0012505 endomembrane system; GO:0016020 membrane; GO:0030054 cell junction; GO:0031090 organelle membrane; GO:0031410 cytopla…	GO:0003824 catalytic activity; GO:0008168 methyltransferase activity; GO:0008757 S-adenosylmethionine-dependent methyltransferase activity; GO:0016740 transferase activity; GO:0016741 transferase activity, transferring one-carbon groups;
TRINITY_DN1911_c0_g1	RecName: Full=Asparagine synthetase, root	0.552	Down	0.0094953	---	65.857	1.521	1.208	1.379	0.757	0.898	0.614	0.799	1.141	1.416	0.808	0.682	0.548	cytoplasm	GO:0006082 organic acid metabolic process; GO:0006520 cellular amino acid metabolic process; GO:0006528 asparagine metabolic process; GO:0006529 asparagine biosynthetic process; GO:0006807 nitrogen compound metabolic process; GO:0006950 response to stress; GO:0007154 cell communication; GO:0008152 metabolic process; GO:0008652 cellular amino acid biosynthetic process; GO:0009056 catabolic process…		GO:0003824 catalytic activity; GO:0004066 asparagine synthase (glutamine-hydrolyzing) activity; GO:0005488 binding; GO:0005515 protein binding; GO:0016874 ligase activity; GO:0016879 ligase activity, forming carbon-nitrogen bonds; GO:0016884 carbon-nitrogen ligase activity, with glutamine as amido-N-donor; GO:0042802 identical protein binding; GO:0042803 protein homodimerization activity; GO:0046…	K01953	asnB, ASNS; asparagine synthase (glutamine-hydrolysing) [EC:6.3.5.4]	map00250 Alanine, aspartate and glutamate metabolism; map01100 Metabolic pathways; map01110 Biosynthesis of secondary metabolites; map01230 Biosynthesis of amino acids	PF13537; PF00733	Glutamine amidotransferase domain; Asparagine synthase
TRINITY_DN13240_c0_g1	putative glutamine synthetase	0.48	Down	0.005645	---	38.917	1.495	1.481	1.517	0.675	0.8	0.681	1.049	1.104	1.079	0.576	0.605	0.554	cytoplasm	GO:0006082 organic acid metabolic process; GO:0006807 nitrogen compound metabolic process; GO:0008152 metabolic process; GO:0009987 cellular process; GO:0042126 nitrate metabolic process; GO:0042128 nitrate assimilation; GO:0043436 oxoacid metabolic process; GO:0044237 cellular metabolic process; GO:0044281 small molecule metabolic process; GO:0071704 organic substance metabolic process; GO:00719…	GO:0005622 intracellular; GO:0005623 cell; GO:0005737 cytoplasm; GO:0005829 cytosol; GO:0044424 intracellular part; GO:0044444 cytoplasmic part; GO:0044464 cell part;	GO:0003824 catalytic activity; GO:0004356 glutamate-ammonia ligase activity; GO:0016211 ammonia ligase activity; GO:0016874 ligase activity; GO:0016879 ligase activity, forming carbon-nitrogen bonds; GO:0016880 acid-ammonia (or amide) ligase activity;	K01915	glnA, GLUL; glutamine synthetase [EC:6.3.1.2]	map00220 Arginine biosynthesis; map00250 Alanine, aspartate and glutamate metabolism; map00630 Glyoxylate and dicarboxylate metabolism; map00910 Nitrogen metabolism; map01100 Metabolic pathways; map01230 Biosynthesis of amino acids	PF03951; PF00120	Glutamine synthetase, beta-Grasp domain; Glutamine synthetase, catalytic domain
TRINITY_DN402_c0_g1	minichromosome maintenance 2 protein	0.522	Down	0.0058571	---	105.56	1.631	1.439	1.6	0.766	1.001	0.672	1.083	0.997	1.164	0.484	0.477	0.551	nucleus	GO:0000003 reproduction; GO:0003006 developmental process involved in reproduction; GO:0006139 nucleobase-containing compound metabolic process; GO:0006259 DNA metabolic process; GO:0006260 DNA replication; GO:0006261 DNA-dependent DNA replication; GO:0006268 DNA unwinding involved in DNA replication; GO:0006275 regulation of DNA replication; GO:0006725 cellular aromatic compound metabolic proces…	GO:0000347 THO complex; GO:0000785 chromatin; GO:0005622 intracellular; GO:0005623 cell; GO:0005634 nucleus; GO:0005694 chromosome; GO:0005737 cytoplasm; GO:0005829 cytosol; GO:0032991 macromolecular complex; GO:0042555 MCM complex; GO:0043226 organelle; GO:0043227 membrane-bounded organelle; GO:0043228 non-membrane-bounded organelle; GO:0043229 intracellular organelle; GO:0043231 intracellular m…		K02540	MCM2; DNA replication licensing factor MCM2 [EC:3.6.4.12]	map03030 DNA replication	PF00493	MCM2/3/5 family
TRINITY_DN1515_c0_g1	hypothetical protein TSUD_368910	0.533	Down	0.00177591	---	55.787	1.452	1.232	1.334	0.654	0.818	0.67	1.005	1.162	1.196	0.872	0.885	0.755	peroxisome	GO:0006139 nucleobase-containing compound metabolic process; GO:0006725 cellular aromatic compound metabolic process; GO:0006793 phosphorus metabolic process; GO:0006807 nitrogen compound metabolic process; GO:0006810 transport; GO:0008152 metabolic process; GO:0009058 biosynthetic process; GO:0009225 nucleotide-sugar metabolic process; GO:0009226 nucleotide-sugar biosynthetic process; GO:0009812…	GO:0005622 intracellular; GO:0005623 cell; GO:0005737 cytoplasm; GO:0005829 cytosol; GO:0005911 cell-cell junction; GO:0009506 plasmodesma; GO:0030054 cell junction; GO:0044424 intracellular part; GO:0044444 cytoplasmic part; GO:0044464 cell part; GO:0055044 symplast;	GO:0003824 catalytic activity; GO:0010280 UDP-L-rhamnose synthase activity; GO:0016829 lyase activity; GO:0016835 carbon-oxygen lyase activity; GO:0016836 hydro-lyase activity; GO:0050377 UDP-glucose 4,6-dehydratase activity;	K12450	RHM; UDP-glucose 4,6-dehydratase [EC:4.2.1.76]	map00520 Amino sugar and nucleotide sugar metabolism; map01100 Metabolic pathways	PF04321	RmlD substrate binding domain
TRINITY_DN41276_c0_g1	putative cytosolic factor	0.567	Down	0.00124126	---	28.565	1.512	1.419	1.579	0.934	0.869	0.754	0.843	1.041	0.992	0.709	0.687	0.624	peroxisome	GO:0000003 reproduction; GO:0000902 cell morphogenesis; GO:0000904 cell morphogenesis involved in differentiation; GO:0003006 developmental process involved in reproduction; GO:0009653 anatomical structure morphogenesis; GO:0009826 unidimensional cell growth; GO:0009856 pollination; GO:0009860 pollen tube growth; GO:0009932 cell tip growth; GO:0009987 cellular process; GO:0016043 cellular compone…	GO:0005576 extracellular region; GO:0005622 intracellular; GO:0005623 cell; GO:0005737 cytoplasm; GO:0005773 vacuole; GO:0005794 Golgi apparatus; GO:0005886 plasma membrane; GO:0005911 cell-cell junction; GO:0009506 plasmodesma; GO:0009507 chloroplast; GO:0009536 plastid; GO:0012505 endomembrane system; GO:0016020 membrane; GO:0030054 cell junction; GO:0043226 organelle; GO:0043227 membrane-bound…	GO:0002020 protease binding; GO:0005488 binding; GO:0005515 protein binding; GO:0019899 enzyme binding;				PF00650	CRAL/TRIO domain
TRINITY_DN7239_c0_g1	protein BTR1	0.554	Down	0.0067786	---	35.98		1.407	1.469		0.831	0.761		1.089	1.144		0.639	0.559	nucleus	GO:0006139 nucleobase-containing compound metabolic process; GO:0006396 RNA processing; GO:0006725 cellular aromatic compound metabolic process; GO:0006807 nitrogen compound metabolic process; GO:0008152 metabolic process; GO:0008380 RNA splicing; GO:0009719 response to endogenous stimulus; GO:0009725 response to hormone; GO:0009735 response to cytokinin; GO:0009987 cellular process; GO:0010033 r…		GO:0003676 nucleic acid binding; GO:0003723 RNA binding; GO:0003729 mRNA binding; GO:0005488 binding; GO:0097159 organic cyclic compound binding; GO:1901363 heterocyclic compound binding;	K14944	NOVA; RNA-binding protein Nova		PF00013	KH domain
TRINITY_DN2811_c0_g1	hypothetical protein TSUD_297340	0.54	Down	0.00036225	---	67.928	1.534	1.428	1.347	0.715	0.798	0.814	0.955	1.117	1.12	0.775	0.546	0.677	plasma membrane	GO:0002790 peptide secretion; GO:0006810 transport; GO:0006897 endocytosis; GO:0006909 phagocytosis; GO:0007154 cell communication; GO:0007155 cell adhesion; GO:0007165 signal transduction; GO:0008104 protein localization; GO:0008283 cell proliferation; GO:0009306 protein secretion; GO:0009987 cellular process; GO:0015031 protein transport; GO:0015833 peptide transport; GO:0016192 vesicle-mediate…	GO:0005623 cell; GO:0005886 plasma membrane; GO:0005887 integral component of plasma membrane; GO:0016020 membrane; GO:0016021 integral component of membrane; GO:0031224 intrinsic component of membrane; GO:0031226 intrinsic component of plasma membrane; GO:0044425 membrane part; GO:0044459 plasma membrane part; GO:0044464 cell part; GO:0071944 cell periphery;	GO:0004888 transmembrane signaling receptor activity; GO:0038023 signaling receptor activity; GO:0060089 molecular transducer activity;	K17085	TM9SF1; transmembrane 9 superfamily member 1
TRINITY_DN9151_c0_g1	adenosine kinase 2	0.586	Down	0.00025554	---	37.433	1.397	1.349	1.407	0.835	0.853	0.746	0.929	1.077	1.069	0.767	0.64	0.668	cytoplasm	GO:0006139 nucleobase-containing compound metabolic process; GO:0006163 purine nucleotide metabolic process; GO:0006164 purine nucleotide biosynthetic process; GO:0006166 purine ribonucleoside salvage; GO:0006167 AMP biosynthetic process; GO:0006169 adenosine salvage; GO:0006725 cellular aromatic compound metabolic process; GO:0006753 nucleoside phosphate metabolic process; GO:0006793 phosphorus …	GO:0005576 extracellular region; GO:0005622 intracellular; GO:0005623 cell; GO:0005634 nucleus; GO:0005737 cytoplasm; GO:0005829 cytosol; GO:0005886 plasma membrane; GO:0005911 cell-cell junction; GO:0009506 plasmodesma; GO:0009507 chloroplast; GO:0009536 plastid; GO:0016020 membrane; GO:0030054 cell junction; GO:0043226 organelle; GO:0043227 membrane-bounded organelle; GO:0043229 intracellular o…	GO:0003824 catalytic activity; GO:0004001 adenosine kinase activity; GO:0005488 binding; GO:0005507 copper ion binding; GO:0016301 kinase activity; GO:0016740 transferase activity; GO:0016772 transferase activity, transferring phosphorus-containing groups; GO:0016773 phosphotransferase activity, alcohol group as acceptor; GO:0019205 nucleobase-containing compound kinase activity; GO:0019206 nucle…	K00856	E2.7.1.20, ADK; adenosine kinase [EC:2.7.1.20]	map00230 Purine metabolism; map01100 Metabolic pathways
TRINITY_DN12165_c0_g1	Calreticulin 3	0.657	Down	0.005324	---	49.491	1.343	1.625	1.391	1.028	0.966	0.87	0.943	0.815	0.996	0.67	0.617	0.661	cytoplasm	GO:0002218 activation of innate immune response; GO:0002253 activation of immune response; GO:0002376 immune system process; GO:0002682 regulation of immune system process; GO:0002684 positive regulation of immune system process; GO:0006457 protein folding; GO:0006950 response to stress; GO:0006952 defense response; GO:0006955 immune response; GO:0007154 cell communication; GO:0007165 signal tran…	GO:0005622 intracellular; GO:0005623 cell; GO:0005737 cytoplasm; GO:0005783 endoplasmic reticulum; GO:0005789 endoplasmic reticulum membrane; GO:0012505 endomembrane system; GO:0016020 membrane; GO:0031984 organelle subcompartment; GO:0042175 nuclear outer membrane-endoplasmic reticulum membrane network; GO:0043226 organelle; GO:0043227 membrane-bounded organelle; GO:0043229 intracellular organel…		K08057	CALR; calreticulin	map04141 Protein processing in endoplasmic reticulum; map04145 Phagosome
TRINITY_DN19785_c0_g1	hypothetical protein TSUD_362200	0.557	Down	0.0258	---	18.377	1.093		1.029	0.537		0.645	1.268		1.335	1.114		0.99	cytoplasm				K15095	E1.1.1.208; (+)-neomenthol dehydrogenase [EC:1.1.1.208]	map00902 Monoterpenoid biosynthesis; map01110 Biosynthesis of secondary metabolites	PF00106	short chain dehydrogenase
TRINITY_DN9209_c0_g1	alcohol acyltransferase	0.471	Down	0.0098624	---	51.399		1.695	1.584		0.721	0.825		0.989	0.995		0.533	0.522	cytoplasm	GO:0000902 cell morphogenesis; GO:0000904 cell morphogenesis involved in differentiation; GO:0008152 metabolic process; GO:0009058 biosynthetic process; GO:0009059 macromolecule biosynthetic process; GO:0009653 anatomical structure morphogenesis; GO:0009888 tissue development; GO:0009987 cellular process; GO:0010026 trichome differentiation; GO:0010090 trichome morphogenesis; GO:0010143 cutin bio…	GO:0005622 intracellular; GO:0005623 cell; GO:0005737 cytoplasm; GO:0044424 intracellular part; GO:0044464 cell part;		K19747	DCR; BAHD acyltransferase [EC:2.3.1.-]
TRINITY_DN7996_c0_g1	hypothetical protein TSUD_234460	0.571	Down	0.00032218	---	49.751	1.534	1.441	1.337	0.836	0.777	0.851	1.085	1.122	1.108	0.525	0.628	0.664	cytoplasm	GO:0001101 response to acid chemical; GO:0002239 response to oomycetes; GO:0006950 response to stress; GO:0006970 response to osmotic stress; GO:0007623 circadian rhythm; GO:0009266 response to temperature stimulus; GO:0009314 response to radiation; GO:0009409 response to cold; GO:0009414 response to water deprivation; GO:0009415 response to water; GO:0009416 response to light stimulus; GO:000960…	GO:0005623 cell; GO:0005886 plasma membrane; GO:0005911 cell-cell junction; GO:0009506 plasmodesma; GO:0016020 membrane; GO:0030054 cell junction; GO:0044464 cell part; GO:0055044 symplast; GO:0071944 cell periphery;		K19366	SPG20; spartin	map04144 Endocytosis
TRINITY_DN18267_c0_g1	squalene synthase	0.661	Down	0.034881	---	43.173		1.251	1.236		0.887	0.756		1.154	1.247		0.689	0.728	chloroplast	GO:0006629 lipid metabolic process; GO:0006644 phospholipid metabolic process; GO:0006694 steroid biosynthetic process; GO:0006720 isoprenoid metabolic process; GO:0006721 terpenoid metabolic process; GO:0006793 phosphorus metabolic process; GO:0006796 phosphate-containing compound metabolic process; GO:0008152 metabolic process; GO:0008202 steroid metabolic process; GO:0008610 lipid biosynthetic…	GO:0005622 intracellular; GO:0005623 cell; GO:0005737 cytoplasm; GO:0005783 endoplasmic reticulum; GO:0005789 endoplasmic reticulum membrane; GO:0005886 plasma membrane; GO:0012505 endomembrane system; GO:0016020 membrane; GO:0031984 organelle subcompartment; GO:0042175 nuclear outer membrane-endoplasmic reticulum membrane network; GO:0043226 organelle; GO:0043227 membrane-bounded organelle; GO:0…	GO:0003824 catalytic activity; GO:0004310 farnesyl-diphosphate farnesyltransferase activity; GO:0004311 farnesyltranstransferase activity; GO:0004659 prenyltransferase activity; GO:0016740 transferase activity; GO:0016765 transferase activity, transferring alkyl or aryl (other than methyl) groups; GO:0051996 squalene synthase activity;	K00801	FDFT1; farnesyl-diphosphate farnesyltransferase [EC:2.5.1.21]	map00100 Steroid biosynthesis; map00909 Sesquiterpenoid and triterpenoid biosynthesis; map01100 Metabolic pathways; map01110 Biosynthesis of secondary metabolites	PF00494	Squalene/phytoene synthase
TRINITY_DN3726_c0_g1	phospho-2-dehydro-3-deoxyheptonate aldolase	0.384	Down	0.0027222	---	59.774	2.006	1.505	1.489	0.553	0.782	0.583	0.901	1.131	1.276	0.392	0.467	0.501	chloroplast		GO:0005622 intracellular; GO:0005623 cell; GO:0005737 cytoplasm; GO:0009507 chloroplast; GO:0009536 plastid; GO:0043226 organelle; GO:0043227 membrane-bounded organelle; GO:0043229 intracellular organelle; GO:0043231 intracellular membrane-bounded organelle; GO:0044424 intracellular part; GO:0044444 cytoplasmic part; GO:0044464 cell part;		K01626	E2.5.1.54, aroF, aroG, aroH; 3-deoxy-7-phosphoheptulonate synthase [EC:2.5.1.54]	map00400 Phenylalanine, tyrosine and tryptophan biosynthesis; map01100 Metabolic pathways; map01110 Biosynthesis of secondary metabolites; map01230 Biosynthesis of amino acids	PF01474	Class-II DAHP synthetase family
TRINITY_DN16899_c0_g1	RecName: Full=1-aminocyclopropane-1-carboxylate oxidase; Short=ACC oxidase; AltName: Full=Ethylene-forming enzyme; Short=EFE	0.576	Down	0.00082022	---	36.088	1.314	1.386	1.485	0.87	0.808	0.733	1.12	1.302	1.202	0.703	0.335	0.46	cytoskeleton	GO:0008152 metabolic process; GO:0009058 biosynthetic process; GO:0009692 ethylene metabolic process; GO:0009693 ethylene biosynthetic process; GO:0009987 cellular process; GO:0010817 regulation of hormone levels; GO:0042445 hormone metabolic process; GO:0042446 hormone biosynthetic process; GO:0043449 cellular alkene metabolic process; GO:0043450 alkene biosynthetic process; GO:0044237 cellular …			K05933	E1.14.17.4; aminocyclopropanecarboxylate oxidase [EC:1.14.17.4]	map00270 Cysteine and methionine metabolism; map01100 Metabolic pathways; map01110 Biosynthesis of secondary metabolites	PF03171	2OG-Fe(II) oxygenase superfamily
TRINITY_DN9060_c0_g1	anthocyanidin 3-O-glucosyltransferase 2-like protein	0.379	Down	0.029676	---	52.02	1.887		1.352	0.629		0.6	0.837		1.418	0.582		0.56	chloroplast				K12930	BZ1; anthocyanidin 3-O-glucosyltransferase [EC:2.4.1.115]	map00942 Anthocyanin biosynthesis; map01100 Metabolic pathways; map01110 Biosynthesis of secondary metabolites
TRINITY_DN31194_c0_g1	chitinase/Hevein/PR-4/Wheatwin2	0.243	Down	0.0143604	---	23.652	2.537	2.386	2.446	0.601	0.77	0.423	0.592	0.546	0.688	0.137	0.194	0.243	extracellular	GO:0002376 immune system process; GO:0006139 nucleobase-containing compound metabolic process; GO:0006725 cellular aromatic compound metabolic process; GO:0006807 nitrogen compound metabolic process; GO:0006950 response to stress; GO:0006952 defense response; GO:0006955 immune response; GO:0006970 response to osmotic stress; GO:0008152 metabolic process; GO:0009605 response to external stimulus; …		GO:0003824 catalytic activity; GO:0004518 nuclease activity; GO:0004540 ribonuclease activity; GO:0005488 binding; GO:0008061 chitin binding; GO:0008144 drug binding; GO:0016787 hydrolase activity; GO:0016788 hydrolase activity, acting on ester bonds; GO:0097367 carbohydrate derivative binding;				PF00187; PF00967	Chitin recognition protein; Barwin family
TRINITY_DN11303_c0_g1	biotin synthase, mitochondrial	0.451	Down	0.0172243	---	41.056		1.314	1.41		0.676	0.553		1.298	1.349		0.664	0.615	chloroplast			GO:0005488 binding; GO:0008270 zinc ion binding; GO:0043167 ion binding; GO:0043169 cation binding; GO:0046872 metal ion binding; GO:0046914 transition metal ion binding;	K01012	bioB; biotin synthase [EC:2.8.1.6]	map00780 Biotin metabolism; map01100 Metabolic pathways	PF04055; PF06968	Radical SAM superfamily; Biotin and Thiamin Synthesis associated domain
TRINITY_DN5396_c0_g1	Aldehyde dehydrogenase family 2 member B4, mitochondrial	0.572	Down	2.4377e-05	---	58.077	1.487	1.384	1.417	0.843	0.808	0.802	1.074	1.089	1.092	0.583	0.689	0.654	mitochondria	GO:0008152 metabolic process; GO:0055114 oxidation-reduction process;		GO:0003824 catalytic activity; GO:0004029 aldehyde dehydrogenase (NAD) activity; GO:0016491 oxidoreductase activity; GO:0016620 oxidoreductase activity, acting on the aldehyde or oxo group of donors, NAD or NADP as acceptor; GO:0016903 oxidoreductase activity, acting on the aldehyde or oxo group of donors;	K00128	ALDH; aldehyde dehydrogenase (NAD+) [EC:1.2.1.3]	map00010 Glycolysis / Gluconeogenesis; map00053 Ascorbate and aldarate metabolism; map00071 Fatty acid degradation; map00280 Valine, leucine and isoleucine degradation; map00310 Lysine degradation; map00330 Arginine and proline metabolism; map00340 Histidine metabolism; map00380 Tryptophan metabolism; map00410 beta-Alanine metabolism; map00561 Glycerolipid metabolism; map00620 Pyruvate metabolism…
TRINITY_DN5269_c0_g1	bifunctional riboflavin biosynthesis protein RIBA 1, chloroplastic	0.483	Down	0.024519	---	54.571	2.022	1.391	1.418	0.618	1.064	0.651	0.816	0.97	1.315	0.385	0.54	0.541	chloroplast	GO:0006766 vitamin metabolic process; GO:0006767 water-soluble vitamin metabolic process; GO:0006771 riboflavin metabolic process; GO:0006807 nitrogen compound metabolic process; GO:0008152 metabolic process; GO:0009058 biosynthetic process; GO:0009110 vitamin biosynthetic process; GO:0009231 riboflavin biosynthetic process; GO:0009987 cellular process; GO:0017144 drug metabolic process; GO:00181…	GO:0005622 intracellular; GO:0005623 cell; GO:0005737 cytoplasm; GO:0009507 chloroplast; GO:0009532 plastid stroma; GO:0009536 plastid; GO:0009570 chloroplast stroma; GO:0016020 membrane; GO:0043226 organelle; GO:0043227 membrane-bounded organelle; GO:0043229 intracellular organelle; GO:0043231 intracellular membrane-bounded organelle; GO:0044422 organelle part; GO:0044424 intracellular part; GO:…	GO:0003824 catalytic activity; GO:0003933 GTP cyclohydrolase activity; GO:0003935 GTP cyclohydrolase II activity; GO:0008686 3,4-dihydroxy-2-butanone-4-phosphate synthase activity; GO:0016787 hydrolase activity; GO:0016810 hydrolase activity, acting on carbon-nitrogen (but not peptide) bonds; GO:0016814 hydrolase activity, acting on carbon-nitrogen (but not peptide) bonds, in cyclic amidines; GO:…	K14652	ribBA; 3,4-dihydroxy 2-butanone 4-phosphate synthase / GTP cyclohydrolase II [EC:4.1.99.12 3.5.4.25]	map00740 Riboflavin metabolism; map00790 Folate biosynthesis; map01100 Metabolic pathways; map01110 Biosynthesis of secondary metabolites
TRINITY_DN13507_c0_g1	peroxidase	0.508	Down	5.9694e-05	---	38.713	1.533	1.736	1.597	0.834	0.807	0.832	0.885	0.91	0.913	0.735	0.523	0.631	vacuolar membrane	GO:0000902 cell morphogenesis; GO:0002682 regulation of immune system process; GO:0002684 positive regulation of immune system process; GO:0006950 response to stress; GO:0006952 defense response; GO:0006970 response to osmotic stress; GO:0008152 metabolic process; GO:0009314 response to radiation; GO:0009416 response to light stimulus; GO:0009605 response to external stimulus; GO:0009607 response…	GO:0005576 extracellular region; GO:0005618 cell wall; GO:0005622 intracellular; GO:0005623 cell; GO:0005737 cytoplasm; GO:0005773 vacuole; GO:0005774 vacuolar membrane; GO:0005794 Golgi apparatus; GO:0009505 plant-type cell wall; GO:0012505 endomembrane system; GO:0016020 membrane; GO:0030312 external encapsulating structure; GO:0031090 organelle membrane; GO:0043226 organelle; GO:0043227 membra…	GO:0003824 catalytic activity; GO:0004601 peroxidase activity; GO:0016209 antioxidant activity; GO:0016491 oxidoreductase activity; GO:0016684 oxidoreductase activity, acting on peroxide as acceptor;	K00430	E1.11.1.7; peroxidase [EC:1.11.1.7]	map00940 Phenylpropanoid biosynthesis; map01100 Metabolic pathways; map01110 Biosynthesis of secondary metabolites	PF00141	Peroxidase
TRINITY_DN38542_c0_g1	pathogenesis-related protein 10	0.611	Down	0.0135028	---	16.872	0.747	0.642	0.881	0.51	0.476	0.401	1.881	2.15	1.571	0.642	0.562	1.09	cytoplasm							PF00407	Pathogenesis-related protein Bet v I family
TRINITY_DN44074_c0_g1	hypothetical protein TSUD_344200	0.632	Down	0.0167426	---	18.174	1.33	1.26		0.863	0.775		1.03	1.151		0.786	0.794		cytoplasm
TRINITY_DN4880_c0_g1	pyrophosphate--fructose 6-phosphate 1-phosphotransferase subunit beta	0.587	Down	0.00030436	---	38.746	1.395	1.324	1.322	0.844	0.798	0.73	0.954	1.08	1.123	0.795	0.759	0.77	chloroplast	GO:0000003 reproduction; GO:0003006 developmental process involved in reproduction; GO:0005975 carbohydrate metabolic process; GO:0006793 phosphorus metabolic process; GO:0006796 phosphate-containing compound metabolic process; GO:0007275 multicellular organism development; GO:0008152 metabolic process; GO:0009719 response to endogenous stimulus; GO:0009725 response to hormone; GO:0009735 respons…	GO:0005618 cell wall; GO:0005622 intracellular; GO:0005623 cell; GO:0005737 cytoplasm; GO:0005829 cytosol; GO:0016020 membrane; GO:0030312 external encapsulating structure; GO:0044424 intracellular part; GO:0044444 cytoplasmic part; GO:0044464 cell part; GO:0071944 cell periphery;	GO:0003824 catalytic activity; GO:0008443 phosphofructokinase activity; GO:0016301 kinase activity; GO:0016740 transferase activity; GO:0016772 transferase activity, transferring phosphorus-containing groups; GO:0016773 phosphotransferase activity, alcohol group as acceptor; GO:0019200 carbohydrate kinase activity; GO:0047334 diphosphate-fructose-6-phosphate 1-phosphotransferase activity;	K00895	pfp, PFP; diphosphate-dependent phosphofructokinase [EC:2.7.1.90]	map00010 Glycolysis / Gluconeogenesis; map00030 Pentose phosphate pathway; map00051 Fructose and mannose metabolism; map01100 Metabolic pathways; map01110 Biosynthesis of secondary metabolites	PF00365	Phosphofructokinase
TRINITY_DN17101_c0_g1	peroxidase	0.601	Down	0.026561	---	38.652	1.116	1.442	1.293	0.582	0.88	0.851	1.504	0.872	0.89	0.398	0.85	0.958	extracellular	GO:0000902 cell morphogenesis; GO:0002682 regulation of immune system process; GO:0002684 positive regulation of immune system process; GO:0006950 response to stress; GO:0006952 defense response; GO:0006970 response to osmotic stress; GO:0008152 metabolic process; GO:0009314 response to radiation; GO:0009416 response to light stimulus; GO:0009605 response to external stimulus; GO:0009607 response…	GO:0005576 extracellular region; GO:0005618 cell wall; GO:0005622 intracellular; GO:0005623 cell; GO:0005737 cytoplasm; GO:0005773 vacuole; GO:0005774 vacuolar membrane; GO:0005794 Golgi apparatus; GO:0009505 plant-type cell wall; GO:0012505 endomembrane system; GO:0016020 membrane; GO:0030312 external encapsulating structure; GO:0031090 organelle membrane; GO:0043226 organelle; GO:0043227 membra…	GO:0003824 catalytic activity; GO:0004601 peroxidase activity; GO:0016209 antioxidant activity; GO:0016491 oxidoreductase activity; GO:0016684 oxidoreductase activity, acting on peroxide as acceptor;	K00430	E1.11.1.7; peroxidase [EC:1.11.1.7]	map00940 Phenylpropanoid biosynthesis; map01100 Metabolic pathways; map01110 Biosynthesis of secondary metabolites	PF00141	Peroxidase
TRINITY_DN32112_c0_g1	S-adenosylmethionine synthase 2 isoform D	0.407	Down	0.0087433	---	24.048	1.55	1.871	1.983	0.779	0.917	0.505	1.291	0.84	1.034	0.352	0.305	0.33	cytoplasm		GO:0005622 intracellular; GO:0005623 cell; GO:0005737 cytoplasm; GO:0005829 cytosol; GO:0044424 intracellular part; GO:0044444 cytoplasmic part; GO:0044464 cell part;	GO:0003824 catalytic activity; GO:0004478 methionine adenosyltransferase activity; GO:0016740 transferase activity; GO:0016765 transferase activity, transferring alkyl or aryl (other than methyl) groups;	K00789	metK; S-adenosylmethionine synthetase [EC:2.5.1.6]	map00270 Cysteine and methionine metabolism; map01100 Metabolic pathways; map01110 Biosynthesis of secondary metabolites; map01230 Biosynthesis of amino acids	PF00438; PF02772; PF02773	S-adenosylmethionine synthetase, N-terminal domain; S-adenosylmethionine synthetase, central domain; S-adenosylmethionine synthetase, C-terminal domain
TRINITY_DN4163_c0_g1	hypothetical protein TSUD_187010	0.647	Down	0.0060425	---	58.764	1.346	1.368	1.349	0.927	0.878	0.825	1.015	1.068	1.103	0.762	0.648	0.664	mitochondria	GO:0008152 metabolic process; GO:0055114 oxidation-reduction process;		GO:0003824 catalytic activity; GO:0004029 aldehyde dehydrogenase (NAD) activity; GO:0016491 oxidoreductase activity; GO:0016620 oxidoreductase activity, acting on the aldehyde or oxo group of donors, NAD or NADP as acceptor; GO:0016903 oxidoreductase activity, acting on the aldehyde or oxo group of donors;	K00128	ALDH; aldehyde dehydrogenase (NAD+) [EC:1.2.1.3]	map00010 Glycolysis / Gluconeogenesis; map00053 Ascorbate and aldarate metabolism; map00071 Fatty acid degradation; map00280 Valine, leucine and isoleucine degradation; map00310 Lysine degradation; map00330 Arginine and proline metabolism; map00340 Histidine metabolism; map00380 Tryptophan metabolism; map00410 beta-Alanine metabolism; map00561 Glycerolipid metabolism; map00620 Pyruvate metabolism…
TRINITY_DN6396_c0_g1	putative uridine diphosphate glucose dehydrogenase	0.574	Down	0.00126287	---	52.962	1.323	1.349	1.397	0.774	0.872	0.691	1.095	1.083	1.103	0.756	0.676	0.81	extracellular	GO:0005975 carbohydrate metabolic process; GO:0005976 polysaccharide metabolic process; GO:0006022 aminoglycan metabolic process; GO:0006023 aminoglycan biosynthetic process; GO:0006024 glycosaminoglycan biosynthetic process; GO:0006065 UDP-glucuronate biosynthetic process; GO:0006082 organic acid metabolic process; GO:0006139 nucleobase-containing compound metabolic process; GO:0006725 cellular …	GO:0005576 extracellular region; GO:0005618 cell wall; GO:0005622 intracellular; GO:0005623 cell; GO:0005634 nucleus; GO:0005737 cytoplasm; GO:0005829 cytosol; GO:0030312 external encapsulating structure; GO:0043226 organelle; GO:0043227 membrane-bounded organelle; GO:0043229 intracellular organelle; GO:0043231 intracellular membrane-bounded organelle; GO:0044424 intracellular part; GO:0044444 cy…	GO:0003824 catalytic activity; GO:0003979 UDP-glucose 6-dehydrogenase activity; GO:0016491 oxidoreductase activity; GO:0016614 oxidoreductase activity, acting on CH-OH group of donors; GO:0016616 oxidoreductase activity, acting on the CH-OH group of donors, NAD or NADP as acceptor;	K00012	UGDH, ugd; UDPglucose 6-dehydrogenase [EC:1.1.1.22]	map00040 Pentose and glucuronate interconversions; map00053 Ascorbate and aldarate metabolism; map00520 Amino sugar and nucleotide sugar metabolism; map01100 Metabolic pathways	PF03721; PF00984; PF03720	UDP-glucose/GDP-mannose dehydrogenase family, NAD binding domain; UDP-glucose/GDP-mannose dehydrogenase family, central domain; UDP-glucose/GDP-mannose dehydrogenase family, UDP binding domain
TRINITY_DN37893_c0_g1	cell wall / vacuolar inhibitor of fructosidase 1	0.525	Down	0.0024834	---	19.948	1.624	1.308	1.603	0.893	0.718	0.772	0.92	1.412	1.031	0.541	0.498	0.513	chloroplast	GO:0000003 reproduction; GO:0000902 cell morphogenesis; GO:0000904 cell morphogenesis involved in differentiation; GO:0003006 developmental process involved in reproduction; GO:0009653 anatomical structure morphogenesis; GO:0009826 unidimensional cell growth; GO:0009856 pollination; GO:0009860 pollen tube growth; GO:0009932 cell tip growth; GO:0009987 cellular process; GO:0016043 cellular compone…	GO:0005618 cell wall; GO:0005623 cell; GO:0012505 endomembrane system; GO:0030312 external encapsulating structure; GO:0030427 site of polarized growth; GO:0035838 growing cell tip; GO:0042995 cell projection; GO:0044463 cell projection part; GO:0044464 cell part; GO:0051286 cell tip; GO:0071944 cell periphery; GO:0090404 pollen tube tip; GO:0090406 pollen tube;	GO:0004857 enzyme inhibitor activity; GO:0030234 enzyme regulator activity; GO:0046910 pectinesterase inhibitor activity; GO:0098772 molecular function regulator;				PF04043	Plant invertase/pectin methylesterase inhibitor
TRINITY_DN2842_c0_g1	hypothetical protein TSUD_336680	0.653	Down	0.010564	---	71.186	1.317	1.41	1.462	0.788	1.073	0.873	0.958	0.78	0.983	0.772	0.687	0.642	cytoplasm				K03283	HSPA1s; heat shock 70kDa protein 1/2/6/8	map03040 Spliceosome; map04141 Protein processing in endoplasmic reticulum; map04144 Endocytosis
TRINITY_DN6694_c0_g1	uncharacterized protein LOC11410928	0.19	Down	3.536e-05	---	54.24	2.372	1.83	2.092	0.39	0.419	0.387	0.798	1.158	1.095	0.302	0.315	0.304	cytoplasm
TRINITY_DN35362_c0_g1	elicitor-responsive protein 3	0.64	Down	0.00044427	---	16.588	1.442	1.263	1.316	0.835	0.88	0.858	1.097	0.985	0.919	0.601	0.874	0.868	cytoplasm							PF00168	C2 domain
TRINITY_DN8497_c0_g1	1-deoxy-D-xylulose 5-phosphate reductoisomerase, chloroplastic	0.392	Down	0.000156149	---	34.311	1.829	1.853	1.548	0.729	0.655	0.664	0.997	1.057	1.023	0.554	0.34	0.636	extracellular				K00099	dxr; 1-deoxy-D-xylulose-5-phosphate reductoisomerase [EC:1.1.1.267]	map00900 Terpenoid backbone biosynthesis; map01100 Metabolic pathways; map01110 Biosynthesis of secondary metabolites	PF08436	1-deoxy-D-xylulose 5-phosphate reductoisomerase C-terminal
TRINITY_DN2080_c0_g1	arogenate dehydrogenase 1, chloroplastic isoform X1	0.344	Down	0.0047645	---	31.562	2.065	1.676	1.586	0.435	0.797	0.599	0.959	1.097	1.197	0.437	0.355	0.526	chloroplast				K15227	TYRAAT; arogenate dehydrogenase (NADP+), plant [EC:1.3.1.78]	map00400 Phenylalanine, tyrosine and tryptophan biosynthesis; map01100 Metabolic pathways; map01110 Biosynthesis of secondary metabolites; map01230 Biosynthesis of amino acids
TRINITY_DN15239_c0_g1	very-long-chain enoyl-CoA reductase	0.623	Down	0.00102049	---	36.157	1.432	1.348	1.307	0.908	0.771	0.866	0.964	1.1	1.068	0.698	0.755	0.728	cytoplasm	GO:0000038 very long-chain fatty acid metabolic process; GO:0000902 cell morphogenesis; GO:0000904 cell morphogenesis involved in differentiation; GO:0006082 organic acid metabolic process; GO:0006629 lipid metabolic process; GO:0006631 fatty acid metabolic process; GO:0006633 fatty acid biosynthetic process; GO:0006643 membrane lipid metabolic process; GO:0006665 sphingolipid metabolic process; …	GO:0005622 intracellular; GO:0005623 cell; GO:0005737 cytoplasm; GO:0005783 endoplasmic reticulum; GO:0005789 endoplasmic reticulum membrane; GO:0005886 plasma membrane; GO:0009923 fatty acid elongase complex; GO:0012505 endomembrane system; GO:0016020 membrane; GO:0016021 integral component of membrane; GO:0030176 integral component of endoplasmic reticulum membrane; GO:0031224 intrinsic compone…	GO:0003824 catalytic activity; GO:0004312 fatty acid synthase activity; GO:0009922 fatty acid elongase activity; GO:0016491 oxidoreductase activity; GO:0016740 transferase activity; GO:0016746 transferase activity, transferring acyl groups; GO:0016747 transferase activity, transferring acyl groups other than amino-acyl groups;	K10258	TER, TSC13, CER10; very-long-chain enoyl-CoA reductase [EC:1.3.1.93]	map00062 Fatty acid elongation; map01040 Biosynthesis of unsaturated fatty acids; map01100 Metabolic pathways; map01110 Biosynthesis of secondary metabolites; map01212 Fatty acid metabolism
TRINITY_DN20771_c0_g1	hypothetical protein TSUD_312940	0.461	Down	4.0218e-05	---	34.414	1.35	1.49	1.506	0.686	0.674	0.644	1.145	1.018	1.021	0.826	0.772	0.77	cytoplasm	GO:0006950 response to stress; GO:0006979 response to oxidative stress; GO:0010035 response to inorganic substance; GO:0010038 response to metal ion; GO:0042221 response to chemical; GO:0046686 response to cadmium ion; GO:0050896 response to stimulus;	GO:0005623 cell; GO:0005886 plasma membrane; GO:0016020 membrane; GO:0044464 cell part; GO:0071944 cell periphery;		K23050	PCBER1; phenylcoumaran benzylic ether reductase [EC:1.3.1.-]
TRINITY_DN17656_c0_g1	vestitone reductase isoform X2	0.546	Down	0.005197	---	36.219	1.169	1.334	1.299	0.831	0.584	0.661	1.17	1.209	0.959	0.759	0.775	0.99	chloroplast				K13265	VR; vestitone reductase [EC:1.1.1.348]	map00943 Isoflavonoid biosynthesis; map01110 Biosynthesis of secondary metabolites
TRINITY_DN18056_c0_g1	peroxidase	0.318	Down	0.009701	---	34.274	1.64	1.795	2.442	0.926	0.478	0.467	0.761	1.121	0.565	0.737	0.511	0.34	chloroplast	GO:0006725 cellular aromatic compound metabolic process; GO:0008152 metabolic process; GO:0009058 biosynthetic process; GO:0009698 phenylpropanoid metabolic process; GO:0009699 phenylpropanoid biosynthetic process; GO:0009808 lignin metabolic process; GO:0009809 lignin biosynthetic process; GO:0009888 tissue development; GO:0009889 regulation of biosynthetic process; GO:0009891 positive regulatio…	GO:0005576 extracellular region; GO:0005618 cell wall; GO:0005622 intracellular; GO:0005623 cell; GO:0005737 cytoplasm; GO:0005794 Golgi apparatus; GO:0005829 cytosol; GO:0012505 endomembrane system; GO:0030312 external encapsulating structure; GO:0043226 organelle; GO:0043227 membrane-bounded organelle; GO:0043229 intracellular organelle; GO:0043231 intracellular membrane-bounded organelle; GO:0…		K00430	E1.11.1.7; peroxidase [EC:1.11.1.7]	map00940 Phenylpropanoid biosynthesis; map01100 Metabolic pathways; map01110 Biosynthesis of secondary metabolites	PF00141	Peroxidase
TRINITY_DN6956_c0_g1	berberine bridge enzyme-like 17	0.603	Down	0.0023766	---	59.208	1.428	1.525	1.328	0.943	0.762	0.876	0.856	0.938	0.946	0.782	0.745	0.829	chloroplast							PF01565; PF08031	FAD binding domain ; Berberine and berberine like
TRINITY_DN269_c0_g1	plasma membrane H(+)-ATPase precursor	0.564	Down	0.00047898	---	104.7	1.572	1.452	1.326	0.792	0.805	0.857	1.014	1.11	0.987	0.597	0.59	0.806	plasma membrane	GO:0001101 response to acid chemical; GO:0006810 transport; GO:0006811 ion transport; GO:0006812 cation transport; GO:0006950 response to stress; GO:0009414 response to water deprivation; GO:0009415 response to water; GO:0009628 response to abiotic stimulus; GO:0009719 response to endogenous stimulus; GO:0009725 response to hormone; GO:0009737 response to abscisic acid; GO:0009987 cellular proces…	GO:0005622 intracellular; GO:0005623 cell; GO:0005634 nucleus; GO:0005737 cytoplasm; GO:0005773 vacuole; GO:0005794 Golgi apparatus; GO:0005886 plasma membrane; GO:0005911 cell-cell junction; GO:0009506 plasmodesma; GO:0012505 endomembrane system; GO:0016020 membrane; GO:0016021 integral component of membrane; GO:0030054 cell junction; GO:0031224 intrinsic component of membrane; GO:0043226 organe…	GO:0000287 magnesium ion binding; GO:0003824 catalytic activity; GO:0005215 transporter activity; GO:0005488 binding; GO:0008324 cation transmembrane transporter activity; GO:0008553 hydrogen-exporting ATPase activity, phosphorylative mechanism; GO:0015075 ion transmembrane transporter activity; GO:0015077 monovalent inorganic cation transmembrane transporter activity; GO:0015078 hydrogen ion tra…	K01535	PMA1, PMA2; H+-transporting ATPase [EC:7.1.2.1]	map00190 Oxidative phosphorylation; map01100 Metabolic pathways	PF00690; PF00702	Cation transporter/ATPase, N-terminus; haloacid dehalogenase-like hydrolase
TRINITY_DN10073_c0_g1	metacaspase-5	0.46	Down	0.00047615	---	23.727	1.549	1.554	1.669	0.767	0.796	0.634	1.014	1.012	1.023	0.647	0.593	0.583	cytoplasm	GO:0000302 response to reactive oxygen species; GO:0006508 proteolysis; GO:0006807 nitrogen compound metabolic process; GO:0006950 response to stress; GO:0006979 response to oxidative stress; GO:0008152 metabolic process; GO:0008219 cell death; GO:0009314 response to radiation; GO:0009411 response to UV; GO:0009416 response to light stimulus; GO:0009628 response to abiotic stimulus; GO:0009636 re…	GO:0005622 intracellular; GO:0005623 cell; GO:0005737 cytoplasm; GO:0005829 cytosol; GO:0005886 plasma membrane; GO:0005911 cell-cell junction; GO:0009506 plasmodesma; GO:0009507 chloroplast; GO:0009536 plastid; GO:0016020 membrane; GO:0030054 cell junction; GO:0043226 organelle; GO:0043227 membrane-bounded organelle; GO:0043229 intracellular organelle; GO:0043231 intracellular membrane-bounded o…	GO:0003824 catalytic activity; GO:0004175 endopeptidase activity; GO:0004197 cysteine-type endopeptidase activity; GO:0005488 binding; GO:0005515 protein binding; GO:0008233 peptidase activity; GO:0008234 cysteine-type peptidase activity; GO:0016787 hydrolase activity; GO:0042802 identical protein binding; GO:0070011 peptidase activity, acting on L-amino acid peptides;				PF00656	Caspase domain
TRINITY_DN2881_c0_g1	asparagine synthetase	0.558	Down	0.005038	---	71.771	1.439	1.135	1.028	0.672	0.697	0.64	0.923	1.301	1.609	0.956	0.845	0.694	cytoskeleton	GO:0006082 organic acid metabolic process; GO:0006520 cellular amino acid metabolic process; GO:0006528 asparagine metabolic process; GO:0006529 asparagine biosynthetic process; GO:0006807 nitrogen compound metabolic process; GO:0006950 response to stress; GO:0007154 cell communication; GO:0008152 metabolic process; GO:0008652 cellular amino acid biosynthetic process; GO:0009056 catabolic process…		GO:0003824 catalytic activity; GO:0004066 asparagine synthase (glutamine-hydrolyzing) activity; GO:0005488 binding; GO:0005515 protein binding; GO:0016874 ligase activity; GO:0016879 ligase activity, forming carbon-nitrogen bonds; GO:0016884 carbon-nitrogen ligase activity, with glutamine as amido-N-donor; GO:0042802 identical protein binding; GO:0042803 protein homodimerization activity; GO:0046…	K01953	asnB, ASNS; asparagine synthase (glutamine-hydrolysing) [EC:6.3.5.4]	map00250 Alanine, aspartate and glutamate metabolism; map01100 Metabolic pathways; map01110 Biosynthesis of secondary metabolites; map01230 Biosynthesis of amino acids	PF13537; PF00733	Glutamine amidotransferase domain; Asparagine synthase
TRINITY_DN5144_c0_g1	pectin methylesterase	0.534	Down	0.00059934	---	60.556	1.541	1.419	1.246	0.754	0.764	0.73	0.893	1.054	1.066	0.822	0.7	0.873	endoplasmic reticulum	GO:0009605 response to external stimulus; GO:0009607 response to biotic stimulus; GO:0009617 response to bacterium; GO:0043086 negative regulation of catalytic activity; GO:0043207 response to external biotic stimulus; GO:0044092 negative regulation of molecular function; GO:0050790 regulation of catalytic activity; GO:0050896 response to stimulus; GO:0051704 multi-organism process; GO:0051707 re…	GO:0005618 cell wall; GO:0005622 intracellular; GO:0005623 cell; GO:0005737 cytoplasm; GO:0005773 vacuole; GO:0005774 vacuolar membrane; GO:0005829 cytosol; GO:0016020 membrane; GO:0030312 external encapsulating structure; GO:0031090 organelle membrane; GO:0043226 organelle; GO:0043227 membrane-bounded organelle; GO:0043229 intracellular organelle; GO:0043231 intracellular membrane-bounded organe…	GO:0003824 catalytic activity; GO:0004857 enzyme inhibitor activity; GO:0016787 hydrolase activity; GO:0016788 hydrolase activity, acting on ester bonds; GO:0030234 enzyme regulator activity; GO:0030599 pectinesterase activity; GO:0046910 pectinesterase inhibitor activity; GO:0052689 carboxylic ester hydrolase activity; GO:0098772 molecular function regulator;	K01051	E3.1.1.11; pectinesterase [EC:3.1.1.11]	map00040 Pentose and glucuronate interconversions; map01100 Metabolic pathways	PF04043	Plant invertase/pectin methylesterase inhibitor
TRINITY_DN47119_c0_g1	gibberellin-regulated protein 4-like	0.306	Down	0.0199392	---	12.171	2.022	1.027	1.587	0.373	0.73	0.315	1.281	1.609	1.746	0.207	0.584	0.209	extracellular	GO:0001101 response to acid chemical; GO:0007154 cell communication; GO:0007165 signal transduction; GO:0009719 response to endogenous stimulus; GO:0009725 response to hormone; GO:0009739 response to gibberellin; GO:0009740 gibberellic acid mediated signaling pathway; GO:0009755 hormone-mediated signaling pathway; GO:0009987 cellular process; GO:0010033 response to organic substance; GO:0010476 g…	GO:0005576 extracellular region;
TRINITY_DN1966_c0_g1	hypothetical protein TSUD_370720	0.554	Down	0.00033633	---	68.76	1.43	1.33	1.481	0.803	0.824	0.721	1.018	1.199	0.985	0.724	0.567	0.729	chloroplast	GO:0008152 metabolic process; GO:0032259 methylation;	GO:0005622 intracellular; GO:0005623 cell; GO:0005737 cytoplasm; GO:0005768 endosome; GO:0005794 Golgi apparatus; GO:0005802 trans-Golgi network; GO:0012505 endomembrane system; GO:0016020 membrane; GO:0031410 cytoplasmic vesicle; GO:0031982 vesicle; GO:0031984 organelle subcompartment; GO:0043226 organelle; GO:0043227 membrane-bounded organelle; GO:0043229 intracellular organelle; GO:0043231 int…	GO:0003824 catalytic activity; GO:0008168 methyltransferase activity; GO:0008757 S-adenosylmethionine-dependent methyltransferase activity; GO:0016740 transferase activity; GO:0016741 transferase activity, transferring one-carbon groups;
TRINITY_DN10399_c0_g1	protein arginine N-methyltransferase PRMT10	0.638	Down	0.0095409	---	42.104		1.265	1.35		0.859	0.809		1.208	1.197		0.64	0.594	cytoplasm	GO:0000003 reproduction; GO:0003006 developmental process involved in reproduction; GO:0006325 chromatin organization; GO:0006355 regulation of transcription, DNA-templated; GO:0006464 cellular protein modification process; GO:0006479 protein methylation; GO:0006807 nitrogen compound metabolic process; GO:0006996 organelle organization; GO:0007275 multicellular organism development; GO:0008152 me…	GO:0005622 intracellular; GO:0005623 cell; GO:0005737 cytoplasm; GO:0005829 cytosol; GO:0044424 intracellular part; GO:0044444 cytoplasmic part; GO:0044464 cell part;	GO:0003824 catalytic activity; GO:0008168 methyltransferase activity; GO:0008170 N-methyltransferase activity; GO:0008276 protein methyltransferase activity; GO:0008469 histone-arginine N-methyltransferase activity; GO:0008757 S-adenosylmethionine-dependent methyltransferase activity; GO:0016273 arginine N-methyltransferase activity; GO:0016274 protein-arginine N-methyltransferase activity; GO:00…	K11434	PRMT1; type I protein arginine methyltransferase [EC:2.1.1.319]
TRINITY_DN24629_c0_g1	dehydrin-cognate	0.635	Down	4.6911e-07	---	24.006	1.329	1.365	1.354	0.85	0.856	0.863	1.123	1.193	1.011	0.548	0.535	0.686	nucleus	GO:0001101 response to acid chemical; GO:0006950 response to stress; GO:0009266 response to temperature stimulus; GO:0009409 response to cold; GO:0009414 response to water deprivation; GO:0009415 response to water; GO:0009628 response to abiotic stimulus; GO:0009631 cold acclimation; GO:0009719 response to endogenous stimulus; GO:0009725 response to hormone; GO:0009737 response to abscisic acid; …	GO:0005622 intracellular; GO:0005623 cell; GO:0005634 nucleus; GO:0005737 cytoplasm; GO:0005829 cytosol; GO:0005911 cell-cell junction; GO:0009506 plasmodesma; GO:0016020 membrane; GO:0019898 extrinsic component of membrane; GO:0030054 cell junction; GO:0043226 organelle; GO:0043227 membrane-bounded organelle; GO:0043229 intracellular organelle; GO:0043231 intracellular membrane-bounded organelle…	GO:0001786 phosphatidylserine binding; GO:0003779 actin binding; GO:0005488 binding; GO:0005507 copper ion binding; GO:0005515 protein binding; GO:0005543 phospholipid binding; GO:0008092 cytoskeletal protein binding; GO:0008289 lipid binding; GO:0016151 nickel cation binding; GO:0031210 phosphatidylcholine binding; GO:0043167 ion binding; GO:0043168 anion binding; GO:0043169 cation binding; GO:0…
TRINITY_DN17998_c0_g1	peroxidase	0.358	Down	0.0027175	---	38.272	1.628	1.428	1.921	0.742	0.569	0.472	1.115	1.569	0.993	0.311	0.331	0.481	extracellular	GO:0000902 cell morphogenesis; GO:0002682 regulation of immune system process; GO:0002684 positive regulation of immune system process; GO:0006950 response to stress; GO:0006952 defense response; GO:0006970 response to osmotic stress; GO:0008152 metabolic process; GO:0009314 response to radiation; GO:0009416 response to light stimulus; GO:0009605 response to external stimulus; GO:0009607 response…	GO:0005576 extracellular region; GO:0005618 cell wall; GO:0005622 intracellular; GO:0005623 cell; GO:0005737 cytoplasm; GO:0005773 vacuole; GO:0005774 vacuolar membrane; GO:0005794 Golgi apparatus; GO:0009505 plant-type cell wall; GO:0012505 endomembrane system; GO:0016020 membrane; GO:0030312 external encapsulating structure; GO:0031090 organelle membrane; GO:0043226 organelle; GO:0043227 membra…	GO:0003824 catalytic activity; GO:0004601 peroxidase activity; GO:0016209 antioxidant activity; GO:0016491 oxidoreductase activity; GO:0016684 oxidoreductase activity, acting on peroxide as acceptor;	K00430	E1.11.1.7; peroxidase [EC:1.11.1.7]	map00940 Phenylpropanoid biosynthesis; map01100 Metabolic pathways; map01110 Biosynthesis of secondary metabolites	PF00141	Peroxidase
TRINITY_DN9371_c0_g1	polyadenylate-binding protein-interacting protein 12-like	0.585	Down	0.0151562	---	41.621	1.296		1.339	0.821		0.721	1.081		1.079	0.811		0.827	cytoplasm		GO:0005622 intracellular; GO:0005623 cell; GO:0005634 nucleus; GO:0005654 nucleoplasm; GO:0016604 nuclear body; GO:0016607 nuclear speck; GO:0031974 membrane-enclosed lumen; GO:0031981 nuclear lumen; GO:0043226 organelle; GO:0043227 membrane-bounded organelle; GO:0043229 intracellular organelle; GO:0043231 intracellular membrane-bounded organelle; GO:0043233 organelle lumen; GO:0044422 organelle …	GO:0003676 nucleic acid binding; GO:0003723 RNA binding; GO:0003729 mRNA binding; GO:0005488 binding; GO:0097159 organic cyclic compound binding; GO:1901363 heterocyclic compound binding;				PF00076	RNA recognition motif. (a.k.a. RRM, RBD, or RNP domain)
TRINITY_DN7567_c0_g1	malate synthase, glyoxysomal	0.497	Down	0.00117992	---	61.168	1.399	1.248	1.24	0.713	0.665	0.553	1.29	1.435	1.513	0.455	0.445	0.625	peroxisome	GO:0005975 carbohydrate metabolic process; GO:0006081 cellular aldehyde metabolic process; GO:0006082 organic acid metabolic process; GO:0006097 glyoxylate cycle; GO:0008152 metabolic process; GO:0009987 cellular process; GO:0019752 carboxylic acid metabolic process; GO:0032787 monocarboxylic acid metabolic process; GO:0043436 oxoacid metabolic process; GO:0044237 cellular metabolic process; GO:0…	GO:0005622 intracellular; GO:0005623 cell; GO:0005737 cytoplasm; GO:0005777 peroxisome; GO:0009514 glyoxysome; GO:0042579 microbody; GO:0043226 organelle; GO:0043227 membrane-bounded organelle; GO:0043229 intracellular organelle; GO:0043231 intracellular membrane-bounded organelle; GO:0044424 intracellular part; GO:0044444 cytoplasmic part; GO:0044464 cell part;	GO:0003824 catalytic activity; GO:0004474 malate synthase activity; GO:0016740 transferase activity; GO:0016746 transferase activity, transferring acyl groups; GO:0046912 transferase activity, transferring acyl groups, acyl groups converted into alkyl on transfer;	K01638	aceB, glcB; malate synthase [EC:2.3.3.9]	map00620 Pyruvate metabolism; map00630 Glyoxylate and dicarboxylate metabolism; map01100 Metabolic pathways; map01110 Biosynthesis of secondary metabolites; map01200 Carbon metabolism
TRINITY_DN27779_c0_g1	pollen-specific protein SF3-like	0.558	Down	0.0030799	---	20.77		1.376	1.295		0.754	0.737		1.039	1.225		0.809	0.701	nucleus	GO:0006996 organelle organization; GO:0007010 cytoskeleton organization; GO:0007015 actin filament organization; GO:0009987 cellular process; GO:0016043 cellular component organization; GO:0022607 cellular component assembly; GO:0030029 actin filament-based process; GO:0030036 actin cytoskeleton organization; GO:0044085 cellular component biogenesis; GO:0051017 actin filament bundle assembly; GO:…		GO:0003779 actin binding; GO:0005488 binding; GO:0005515 protein binding; GO:0008092 cytoskeletal protein binding; GO:0044877 macromolecular complex binding; GO:0051015 actin filament binding;	K09377	CSRP; cysteine and glycine-rich protein		PF00412	LIM domain
TRINITY_DN5_c0_g1	ABC transporter G family member 36	0.625	Down	0.0068188	---	146.95	1.571	1.249	1.261	0.767	0.911	0.872	0.968	1.057	1.024	0.753	0.777	0.824	plasma membrane	GO:0000041 transition metal ion transport; GO:0001101 response to acid chemical; GO:0002376 immune system process; GO:0006082 organic acid metabolic process; GO:0006725 cellular aromatic compound metabolic process; GO:0006790 sulfur compound metabolic process; GO:0006807 nitrogen compound metabolic process; GO:0006810 transport; GO:0006811 ion transport; GO:0006812 cation transport; GO:0006855 dr…	GO:0005622 intracellular; GO:0005623 cell; GO:0005737 cytoplasm; GO:0005739 mitochondrion; GO:0005773 vacuole; GO:0005774 vacuolar membrane; GO:0005886 plasma membrane; GO:0009507 chloroplast; GO:0009526 plastid envelope; GO:0009536 plastid; GO:0009941 chloroplast envelope; GO:0016020 membrane; GO:0016021 integral component of membrane; GO:0031090 organelle membrane; GO:0031224 intrinsic componen…	GO:0003824 catalytic activity; GO:0005215 transporter activity; GO:0008324 cation transmembrane transporter activity; GO:0015075 ion transmembrane transporter activity; GO:0015086 cadmium ion transmembrane transporter activity; GO:0015318 inorganic solute uptake transmembrane transporter activity; GO:0015399 primary active transmembrane transporter activity; GO:0015405 P-P-bond-hydrolysis-driven …				PF00005	ABC transporter
TRINITY_DN34989_c0_g1	1,4-dihydroxy-2-naphthoyl-CoA thioesterase 1	0.648	Down	0.0204	---	17.318	1.404	1.14	1.344	0.707	0.997	0.815	1.161	1.177	0.989	0.613	0.68	0.821	cytoplasm	GO:0006732 coenzyme metabolic process; GO:0006766 vitamin metabolic process; GO:0008152 metabolic process; GO:0009058 biosynthetic process; GO:0009108 coenzyme biosynthetic process; GO:0009110 vitamin biosynthetic process; GO:0009987 cellular process; GO:0016043 cellular component organization; GO:0022607 cellular component assembly; GO:0042180 cellular ketone metabolic process; GO:0042181 ketone…	GO:0005622 intracellular; GO:0005623 cell; GO:0005737 cytoplasm; GO:0005777 peroxisome; GO:0042579 microbody; GO:0043226 organelle; GO:0043227 membrane-bounded organelle; GO:0043229 intracellular organelle; GO:0043231 intracellular membrane-bounded organelle; GO:0044424 intracellular part; GO:0044444 cytoplasmic part; GO:0044464 cell part;		K19222	menI, DHNAT; 1,4-dihydroxy-2-naphthoyl-CoA hydrolase [EC:3.1.2.28]	map00130 Ubiquinone and other terpenoid-quinone biosynthesis; map01100 Metabolic pathways; map01110 Biosynthesis of secondary metabolites	PF03061	Thioesterase superfamily
TRINITY_DN17940_c0_g1	hypothetical protein TSUD_222020	0.643	Down	0.033337	---	30.618	1.453	1.438	0.981	0.818	0.786	0.886	1.021	1.124	1.333	0.7	0.609	0.804	chloroplast	GO:0003333 amino acid transmembrane transport; GO:0006810 transport; GO:0006811 ion transport; GO:0006812 cation transport; GO:0006820 anion transport; GO:0006839 mitochondrial transport; GO:0006855 drug transmembrane transport; GO:0006865 amino acid transport; GO:0015711 organic anion transport; GO:0015807 L-amino acid transport; GO:0015822 ornithine transport; GO:0015849 organic acid transport;…	GO:0005622 intracellular; GO:0005623 cell; GO:0005737 cytoplasm; GO:0005739 mitochondrion; GO:0005740 mitochondrial envelope; GO:0005743 mitochondrial inner membrane; GO:0009507 chloroplast; GO:0009536 plastid; GO:0016020 membrane; GO:0016021 integral component of membrane; GO:0019866 organelle inner membrane; GO:0031090 organelle membrane; GO:0031224 intrinsic component of membrane; GO:0031966 m…	GO:0000064 L-ornithine transmembrane transporter activity; GO:0005215 transporter activity; GO:0005342 organic acid transmembrane transporter activity; GO:0008324 cation transmembrane transporter activity; GO:0008509 anion transmembrane transporter activity; GO:0008514 organic anion transmembrane transporter activity; GO:0015075 ion transmembrane transporter activity; GO:0015171 amino acid transm…	K15109	SLC25A20_29, CACT, CACL, CRC1; solute carrier family 25 (mitochondrial carnitine/acylcarnitine transporter), member 20/29
TRINITY_DN18456_c0_g1	protein DMR6-LIKE OXYGENASE 1 isoform X1	0.553	Down	0.00062425	---	40.165	1.408	1.259	1.4	0.72	0.824	0.704	1.439	1.183	1.218	0.407	0.71	0.619	cytoplasm							PF03171	2OG-Fe(II) oxygenase superfamily
TRINITY_DN33716_c0_g1	hypothetical protein TSUD_234640	0.66	Down	0.025343	---	17.496	1.099	1.098	1.167	0.907	0.595	0.718	1.09	1.459	1.183	0.887	0.821	0.919	nucleus				K03094	SKP1, CBF3D; S-phase kinase-associated protein 1	map04120 Ubiquitin mediated proteolysis; map04141 Protein processing in endoplasmic reticulum	PF03931; PF01466	Skp1 family, tetramerisation domain; Skp1 family, dimerisation domain
TRINITY_DN14010_c0_g1	hypothetical protein TSUD_330260	0.415	Down	0.00023858	---	28.947	1.588	1.725	1.415	0.706	0.64	0.616	1.146	1.071	1.09	0.572	0.433	0.594	cytoplasm	GO:0008152 metabolic process; GO:0032259 methylation;	GO:0005622 intracellular; GO:0005623 cell; GO:0005737 cytoplasm; GO:0044424 intracellular part; GO:0044464 cell part;	GO:0003824 catalytic activity; GO:0008168 methyltransferase activity; GO:0008757 S-adenosylmethionine-dependent methyltransferase activity; GO:0016740 transferase activity; GO:0016741 transferase activity, transferring one-carbon groups;				PF08241	Methyltransferase domain
TRINITY_DN7866_c0_g1	S-adenosylmethionine synthetase-2	0.222	Down	0.0109587	---	27.996	2.17	2.06	2.005	0.422	0.609	0.354	1.03	1.015	1.17	0.256	0.197	0.307	cytoplasm		GO:0005622 intracellular; GO:0005623 cell; GO:0005737 cytoplasm; GO:0005829 cytosol; GO:0044424 intracellular part; GO:0044444 cytoplasmic part; GO:0044464 cell part;	GO:0003824 catalytic activity; GO:0004478 methionine adenosyltransferase activity; GO:0016740 transferase activity; GO:0016765 transferase activity, transferring alkyl or aryl (other than methyl) groups;	K00789	metK; S-adenosylmethionine synthetase [EC:2.5.1.6]	map00270 Cysteine and methionine metabolism; map01100 Metabolic pathways; map01110 Biosynthesis of secondary metabolites; map01230 Biosynthesis of amino acids	PF02772; PF02773	S-adenosylmethionine synthetase, central domain; S-adenosylmethionine synthetase, C-terminal domain
TRINITY_DN11068_c0_g1	NADP-dependent isocitrate dehydrogenase	0.626	Down	0.000159834	---	45.964	1.424	1.309	1.366	0.873	0.877	0.815	0.996	1.032	1.029	0.712	0.727	0.731	cytoskeleton	GO:0006082 organic acid metabolic process; GO:0006102 isocitrate metabolic process; GO:0006139 nucleobase-containing compound metabolic process; GO:0006725 cellular aromatic compound metabolic process; GO:0006732 coenzyme metabolic process; GO:0006733 oxidoreduction coenzyme metabolic process; GO:0006739 NADP metabolic process; GO:0006753 nucleoside phosphate metabolic process; GO:0006793 phospho…	GO:0005576 extracellular region; GO:0005622 intracellular; GO:0005623 cell; GO:0005737 cytoplasm; GO:0005829 cytosol; GO:0005886 plasma membrane; GO:0005911 cell-cell junction; GO:0009506 plasmodesma; GO:0009507 chloroplast; GO:0009532 plastid stroma; GO:0009536 plastid; GO:0009570 chloroplast stroma; GO:0016020 membrane; GO:0030054 cell junction; GO:0043226 organelle; GO:0043227 membrane-bounded…	GO:0003824 catalytic activity; GO:0004448 isocitrate dehydrogenase activity; GO:0004450 isocitrate dehydrogenase (NADP+) activity; GO:0005488 binding; GO:0005507 copper ion binding; GO:0016491 oxidoreductase activity; GO:0016614 oxidoreductase activity, acting on CH-OH group of donors; GO:0016616 oxidoreductase activity, acting on the CH-OH group of donors, NAD or NADP as acceptor; GO:0043167 ion…	K00031	IDH1, IDH2, icd; isocitrate dehydrogenase [EC:1.1.1.42]	map00020 Citrate cycle (TCA cycle); map00480 Glutathione metabolism; map01100 Metabolic pathways; map01110 Biosynthesis of secondary metabolites; map01200 Carbon metabolism; map01210 2-Oxocarboxylic acid metabolism; map01230 Biosynthesis of amino acids; map04146 Peroxisome	PF00180	Isocitrate/isopropylmalate dehydrogenase
TRINITY_DN9894_c0_g1	RecName: Full=Tubulin beta-2 chain; AltName: Full=Beta-2-tubulin	0.593	Down	0.0088013	---	53.885	1.704	1.441	1.297	1.009	0.842	0.785	0.742	1.213	1.009	0.535	0.429	0.948	chloroplast		GO:0005622 intracellular; GO:0005623 cell; GO:0005856 cytoskeleton; GO:0043226 organelle; GO:0043228 non-membrane-bounded organelle; GO:0043229 intracellular organelle; GO:0043232 intracellular non-membrane-bounded organelle; GO:0044424 intracellular part; GO:0044464 cell part;		K07375	TUBB; tubulin beta	map04145 Phagosome	PF00091; PF03953	Tubulin/FtsZ family, GTPase domain; Tubulin C-terminal domain
TRINITY_DN110_c0_g1	RecName: Full=Phytochrome A	0.459	Down	0.00109879	---	123.91	1.485	1.426	1.521	0.641	0.803	0.591	1.145	1.193	1.28	0.578	0.501	0.52	chloroplast	GO:0006417 regulation of translation; GO:0006464 cellular protein modification process; GO:0006468 protein phosphorylation; GO:0006793 phosphorus metabolic process; GO:0006796 phosphate-containing compound metabolic process; GO:0006807 nitrogen compound metabolic process; GO:0007154 cell communication; GO:0007165 signal transduction; GO:0007275 multicellular organism development; GO:0007602 photo…	GO:0005622 intracellular; GO:0005623 cell; GO:0005634 nucleus; GO:0005654 nucleoplasm; GO:0005737 cytoplasm; GO:0016604 nuclear body; GO:0031974 membrane-enclosed lumen; GO:0031981 nuclear lumen; GO:0043226 organelle; GO:0043227 membrane-bounded organelle; GO:0043229 intracellular organelle; GO:0043231 intracellular membrane-bounded organelle; GO:0043233 organelle lumen; GO:0044422 organelle part…	GO:0003676 nucleic acid binding; GO:0003723 RNA binding; GO:0003729 mRNA binding; GO:0003824 catalytic activity; GO:0004672 protein kinase activity; GO:0005488 binding; GO:0005515 protein binding; GO:0009881 photoreceptor activity; GO:0009883 red or far-red light photoreceptor activity; GO:0016301 kinase activity; GO:0016740 transferase activity; GO:0016772 transferase activity, transferring phos…	K12120	PHYA; phytochrome A	map04712 Circadian rhythm - plant	PF08446; PF01590; PF00989; PF00512; PF02518	PAS fold; GAF domain; PAS fold; His Kinase A (phospho-acceptor) domain; Histidine kinase-, DNA gyrase B-, and HSP90-like ATPase
TRINITY_DN29341_c0_g1	glutathione S-transferase u17, partial	0.644	Down	0.00167606	---	25.185	1.634	1.365	1.489	0.941	1.015	0.936	0.937	1.066	0.916	0.466	0.53	0.582	chloroplast	GO:0006518 peptide metabolic process; GO:0006575 cellular modified amino acid metabolic process; GO:0006749 glutathione metabolic process; GO:0006790 sulfur compound metabolic process; GO:0006807 nitrogen compound metabolic process; GO:0006950 response to stress; GO:0006970 response to osmotic stress; GO:0007275 multicellular organism development; GO:0008152 metabolic process; GO:0009056 cataboli…	GO:0005622 intracellular; GO:0005623 cell; GO:0005737 cytoplasm; GO:0009507 chloroplast; GO:0009536 plastid; GO:0043226 organelle; GO:0043227 membrane-bounded organelle; GO:0043229 intracellular organelle; GO:0043231 intracellular membrane-bounded organelle; GO:0044424 intracellular part; GO:0044444 cytoplasmic part; GO:0044464 cell part;	GO:0003824 catalytic activity; GO:0004364 glutathione transferase activity; GO:0016740 transferase activity; GO:0016765 transferase activity, transferring alkyl or aryl (other than methyl) groups;	K00799	GST, gst; glutathione S-transferase [EC:2.5.1.18]	map00480 Glutathione metabolism; map01100 Metabolic pathways	PF02798; PF00043	Glutathione S-transferase, N-terminal domain; Glutathione S-transferase, C-terminal domain
TRINITY_DN41031_c0_g1	stress-response A/B barrel domain-containing protein HS1 isoform X1	0.558	Down	0.022081	---	12.328	1.486	0.983	1.519	0.666	0.725	0.836	0.907	1.123	0.866	0.926	1.192	0.762	cytoplasm	GO:0006950 response to stress; GO:0006952 defense response; GO:0009605 response to external stimulus; GO:0009607 response to biotic stimulus; GO:0009617 response to bacterium; GO:0009620 response to fungus; GO:0042742 defense response to bacterium; GO:0043207 response to external biotic stimulus; GO:0050832 defense response to fungus; GO:0050896 response to stimulus; GO:0051704 multi-organism pro…	GO:0005622 intracellular; GO:0005623 cell; GO:0005737 cytoplasm; GO:0005829 cytosol; GO:0005886 plasma membrane; GO:0016020 membrane; GO:0044424 intracellular part; GO:0044444 cytoplasmic part; GO:0044464 cell part; GO:0071944 cell periphery;					PF07876	Stress responsive A/B Barrel Domain
TRINITY_DN28794_c0_g1	stem-specific protein TSJT1	0.624	Down	0.00026209	---	28.226	1.38	1.273	1.303	0.829	0.863	0.777	1.116	1.081	0.927	0.646	0.772	0.924	cytoplasm							PF12481	Aluminium induced protein
TRINITY_DN12817_c0_g1	basic 7S globulin 2	0.442	Down	0.00107997	---	45.011	1.364	1.437	1.548	0.575	0.586	0.761	0.954	1.259	1.034	1.1	0.381	0.501	chloroplast
TRINITY_DN11223_c0_g1	pectinacetylesterase family protein	0.631	Down	0.0038815	---	43.779	1.236	1.235	1.251	0.789	0.817	0.741	0.973	1.061	0.973	0.953	0.905	0.932	chloroplast	GO:0009987 cellular process; GO:0016043 cellular component organization; GO:0045229 external encapsulating structure organization; GO:0071554 cell wall organization or biogenesis; GO:0071555 cell wall organization; GO:0071840 cellular component organization or biogenesis;	GO:0005618 cell wall; GO:0005622 intracellular; GO:0005623 cell; GO:0005737 cytoplasm; GO:0005829 cytosol; GO:0005886 plasma membrane; GO:0005911 cell-cell junction; GO:0009505 plant-type cell wall; GO:0009506 plasmodesma; GO:0016020 membrane; GO:0030054 cell junction; GO:0030312 external encapsulating structure; GO:0044424 intracellular part; GO:0044444 cytoplasmic part; GO:0044464 cell part; GO…	GO:0003824 catalytic activity; GO:0016787 hydrolase activity; GO:0016788 hydrolase activity, acting on ester bonds; GO:0052689 carboxylic ester hydrolase activity; GO:0052793 pectin acetylesterase activity;	K19882	NOTUM; O-palmitoleoyl-L-serine hydrolase [EC:3.1.1.98]
TRINITY_DN9508_c0_g1	S-adenosylmethionine synthase	0.263	Down	0.00090237	---	42.981	2.219	1.971	2.022	0.503	0.707	0.426	0.932	0.998	1.078	0.228	0.233	0.3	cytoplasm		GO:0005622 intracellular; GO:0005623 cell; GO:0005737 cytoplasm; GO:0005829 cytosol; GO:0044424 intracellular part; GO:0044444 cytoplasmic part; GO:0044464 cell part;	GO:0003824 catalytic activity; GO:0004478 methionine adenosyltransferase activity; GO:0016740 transferase activity; GO:0016765 transferase activity, transferring alkyl or aryl (other than methyl) groups;	K00789	metK; S-adenosylmethionine synthetase [EC:2.5.1.6]	map00270 Cysteine and methionine metabolism; map01100 Metabolic pathways; map01110 Biosynthesis of secondary metabolites; map01230 Biosynthesis of amino acids	PF00438; PF02772; PF02773	S-adenosylmethionine synthetase, N-terminal domain; S-adenosylmethionine synthetase, central domain; S-adenosylmethionine synthetase, C-terminal domain
TRINITY_DN32691_c0_g1	hypothetical protein TSUD_116880	0.597	Down	0.0076556	---	29.034	1.08	0.955	1.334	0.692	0.688	0.631	1.608	1.637	1.267	0.627	0.678	0.716	cytoplasm							PF04043	Plant invertase/pectin methylesterase inhibitor
TRINITY_DN7416_c0_g1	S-adenosylmethionine synthase 3	0.328	Down	0.042282	---	42.646	2.064	1.68		0.483	0.746		0.908	0.944		0.446	0.576		cytoskeleton		GO:0005622 intracellular; GO:0005623 cell; GO:0005737 cytoplasm; GO:0005829 cytosol; GO:0044424 intracellular part; GO:0044444 cytoplasmic part; GO:0044464 cell part;	GO:0003824 catalytic activity; GO:0004478 methionine adenosyltransferase activity; GO:0016740 transferase activity; GO:0016765 transferase activity, transferring alkyl or aryl (other than methyl) groups;	K00789	metK; S-adenosylmethionine synthetase [EC:2.5.1.6]	map00270 Cysteine and methionine metabolism; map01100 Metabolic pathways; map01110 Biosynthesis of secondary metabolites; map01230 Biosynthesis of amino acids	PF00438; PF02772; PF02773	S-adenosylmethionine synthetase, N-terminal domain; S-adenosylmethionine synthetase, central domain; S-adenosylmethionine synthetase, C-terminal domain
TRINITY_DN1976_c0_g1	ATP-dependent zinc metalloprotease ftsh chloroplastic-like	0.658	Down	0.0105233	---	74.184	1.296	1.221		0.802	0.854		1.112	1.102		0.796	0.814		chloroplast	GO:0006091 generation of precursor metabolites and energy; GO:0006508 proteolysis; GO:0006807 nitrogen compound metabolic process; GO:0006996 organelle organization; GO:0008152 metabolic process; GO:0009056 catabolic process; GO:0009057 macromolecule catabolic process; GO:0009314 response to radiation; GO:0009416 response to light stimulus; GO:0009628 response to abiotic stimulus; GO:0009642 resp…	GO:0005622 intracellular; GO:0005623 cell; GO:0005737 cytoplasm; GO:0009507 chloroplast; GO:0009526 plastid envelope; GO:0009534 chloroplast thylakoid; GO:0009535 chloroplast thylakoid membrane; GO:0009536 plastid; GO:0009579 thylakoid; GO:0009941 chloroplast envelope; GO:0016020 membrane; GO:0031967 organelle envelope; GO:0031975 envelope; GO:0031976 plastid thylakoid; GO:0031977 thylakoid lumen…	GO:0003824 catalytic activity; GO:0004176 ATP-dependent peptidase activity; GO:0008233 peptidase activity; GO:0008237 metallopeptidase activity; GO:0016462 pyrophosphatase activity; GO:0016787 hydrolase activity; GO:0016817 hydrolase activity, acting on acid anhydrides; GO:0016818 hydrolase activity, acting on acid anhydrides, in phosphorus-containing anhydrides; GO:0016887 ATPase activity; GO:00…	K03798	ftsH, hflB; cell division protease FtsH [EC:3.4.24.-]		PF00004; PF01434	ATPase family associated with various cellular activities (AAA); Peptidase family M41
TRINITY_DN12719_c0_g1	ADP,ATP carrier protein mitochondrial-like	0.568	Down	0.0011044	---	40.427	1.453	1.452	1.25	0.85	0.727	0.784	0.932	1.213	1.18	0.842	0.552	0.758	chloroplast	GO:0006810 transport; GO:0006811 ion transport; GO:0006820 anion transport; GO:0006839 mitochondrial transport; GO:0006855 drug transmembrane transport; GO:0006862 nucleotide transport; GO:0006996 organelle organization; GO:0007005 mitochondrion organization; GO:0007006 mitochondrial membrane organization; GO:0009987 cellular process; GO:0015711 organic anion transport; GO:0015748 organophosphate…	GO:0005618 cell wall; GO:0005622 intracellular; GO:0005623 cell; GO:0005634 nucleus; GO:0005730 nucleolus; GO:0005737 cytoplasm; GO:0005739 mitochondrion; GO:0005740 mitochondrial envelope; GO:0005743 mitochondrial inner membrane; GO:0005773 vacuole; GO:0005774 vacuolar membrane; GO:0005886 plasma membrane; GO:0009507 chloroplast; GO:0009526 plastid envelope; GO:0009536 plastid; GO:0009941 chloro…	GO:0000295 adenine nucleotide transmembrane transporter activity; GO:0005215 transporter activity; GO:0005346 purine ribonucleotide transmembrane transporter activity; GO:0005347 ATP transmembrane transporter activity; GO:0005471 ATP:ADP antiporter activity; GO:0005488 binding; GO:0005507 copper ion binding; GO:0008509 anion transmembrane transporter activity; GO:0008514 organic anion transmembra…	K05863	SLC25A4S, ANT; solute carrier family 25 (mitochondrial adenine nucleotide translocator), member 4/5/6/31
TRINITY_DN43879_c0_g1	dormancy-associated protein 1-like	0.591	Down	0.0048194	---	12.256	1.208	1.176	1.342	0.848	0.721	0.632	0.825	1.207	1.074	1.152	0.867	0.986	cytoplasm
TRINITY_DN2617_c0_g1	hypothetical protein TSUD_222760, partial	0.369	Down	0.0075961	---	68.226	1.675	1.65	1.87	0.616	0.871	0.429	1.116	1.176	1.121	0.524	0.298	0.331	cytoplasm	GO:0008152 metabolic process; GO:0032259 methylation;	GO:0005622 intracellular; GO:0005623 cell; GO:0005737 cytoplasm; GO:0005768 endosome; GO:0005794 Golgi apparatus; GO:0005802 trans-Golgi network; GO:0012505 endomembrane system; GO:0031410 cytoplasmic vesicle; GO:0031982 vesicle; GO:0031984 organelle subcompartment; GO:0043226 organelle; GO:0043227 membrane-bounded organelle; GO:0043229 intracellular organelle; GO:0043231 intracellular membrane-b…	GO:0003824 catalytic activity; GO:0008168 methyltransferase activity; GO:0008757 S-adenosylmethionine-dependent methyltransferase activity; GO:0016740 transferase activity; GO:0016741 transferase activity, transferring one-carbon groups;
TRINITY_DN13576_c0_g1	putative cysteine protease	0.476	Down	0.00050265	---	38.575	1.581	1.461	1.393	0.698	0.63	0.782	0.88	1.21	0.993	0.796	0.64	0.796	extracellular	GO:0002376 immune system process; GO:0006508 proteolysis; GO:0006807 nitrogen compound metabolic process; GO:0006955 immune response; GO:0008152 metabolic process; GO:0009056 catabolic process; GO:0009057 macromolecule catabolic process; GO:0009987 cellular process; GO:0019538 protein metabolic process; GO:0030163 protein catabolic process; GO:0043170 macromolecule metabolic process; GO:0044237 c…	GO:0000323 lytic vacuole; GO:0005576 extracellular region; GO:0005615 extracellular space; GO:0005622 intracellular; GO:0005623 cell; GO:0005737 cytoplasm; GO:0005764 lysosome; GO:0005773 vacuole; GO:0043226 organelle; GO:0043227 membrane-bounded organelle; GO:0043229 intracellular organelle; GO:0043231 intracellular membrane-bounded organelle; GO:0044421 extracellular region part; GO:0044424 int…	GO:0003824 catalytic activity; GO:0004175 endopeptidase activity; GO:0004197 cysteine-type endopeptidase activity; GO:0008233 peptidase activity; GO:0008234 cysteine-type peptidase activity; GO:0016787 hydrolase activity; GO:0070011 peptidase activity, acting on L-amino acid peptides;	K01366	CTSH; cathepsin H [EC:3.4.22.16]		PF08246; PF00112	Cathepsin propeptide inhibitor domain (I29); Papain family cysteine protease
TRINITY_DN13964_c0_g1	putative quinone oxidoreductase	0.581	Down	0.025319	---	37.537		1.11	1.3		0.727	0.674		1.452	1.095		0.671	0.904	cytoplasm				K00344	qor, CRYZ; NADPH:quinone reductase [EC:1.6.5.5]		PF08240	Alcohol dehydrogenase GroES-like domain
TRINITY_DN17824_c0_g1	ribonucleoside-diphosphate reductase small chain-like protein	0.608	Down	0.0043751	---	37.711	1.394	1.356	1.524	0.788	1.008	0.804	1.133	1.103	0.861	0.678	0.506	0.763	chloroplast	GO:0006139 nucleobase-containing compound metabolic process; GO:0006259 DNA metabolic process; GO:0006260 DNA replication; GO:0006281 DNA repair; GO:0006725 cellular aromatic compound metabolic process; GO:0006807 nitrogen compound metabolic process; GO:0006950 response to stress; GO:0006974 cellular response to DNA damage stimulus; GO:0007275 multicellular organism development; GO:0008152 metabo…			K10808	RRM2; ribonucleoside-diphosphate reductase subunit M2 [EC:1.17.4.1]	map00230 Purine metabolism; map00240 Pyrimidine metabolism; map00480 Glutathione metabolism; map01100 Metabolic pathways	PF00268	Ribonucleotide reductase, small chain
TRINITY_DN14515_c0_g1	RecName: Full=Bifunctional UDP-glucose 4-epimerase and UDP-xylose 4-epimerase 1; AltName: Full=UDP-D-xylose 4-epimerase; AltName: Full=UDP-L-arabinose 4-epimerase; AltName: Full=UDP-galactose 4-epimerase 1; AltName: Full=UDP-glucose 4-epimerase 1; Short=PsUGE1	0.666	Down	0.002519	---	38.886	1.172	1.139	1.101	0.811	0.788	0.673	1.143	1.302	1.489	0.854	0.706	0.708	chloroplast	GO:0007275 multicellular organism development; GO:0009555 pollen development; GO:0032501 multicellular organismal process; GO:0032502 developmental process; GO:0048229 gametophyte development; GO:0048856 anatomical structure development;	GO:0005622 intracellular; GO:0005623 cell; GO:0005737 cytoplasm; GO:0005829 cytosol; GO:0005886 plasma membrane; GO:0016020 membrane; GO:0044424 intracellular part; GO:0044444 cytoplasmic part; GO:0044464 cell part; GO:0071944 cell periphery;	GO:0003824 catalytic activity; GO:0003978 UDP-glucose 4-epimerase activity; GO:0016853 isomerase activity; GO:0016854 racemase and epimerase activity; GO:0016857 racemase and epimerase activity, acting on carbohydrates and derivatives; GO:0050373 UDP-arabinose 4-epimerase activity;	K01784	galE, GALE; UDP-glucose 4-epimerase [EC:5.1.3.2]	map00052 Galactose metabolism; map00520 Amino sugar and nucleotide sugar metabolism; map01100 Metabolic pathways
TRINITY_DN19196_c0_g1	1-aminocyclopropane-1-carboxylate oxidase 2	0.216	Down	0.00024379	---	35.726	2.064	1.748	1.733	0.426	0.455	0.317	1.076	1.271	1.505	0.325	0.416	0.299	cytoplasm	GO:0000302 response to reactive oxygen species; GO:0001101 response to acid chemical; GO:0006950 response to stress; GO:0006970 response to osmotic stress; GO:0006979 response to oxidative stress; GO:0008152 metabolic process; GO:0009058 biosynthetic process; GO:0009593 detection of chemical stimulus; GO:0009605 response to external stimulus; GO:0009607 response to biotic stimulus; GO:0009620 res…	GO:0005618 cell wall; GO:0005622 intracellular; GO:0005623 cell; GO:0005737 cytoplasm; GO:0005783 endoplasmic reticulum; GO:0005794 Golgi apparatus; GO:0005829 cytosol; GO:0005886 plasma membrane; GO:0005911 cell-cell junction; GO:0009506 plasmodesma; GO:0012505 endomembrane system; GO:0016020 membrane; GO:0030054 cell junction; GO:0030312 external encapsulating structure; GO:0043226 organelle; G…	GO:0003824 catalytic activity; GO:0005488 binding; GO:0005507 copper ion binding; GO:0009815 1-aminocyclopropane-1-carboxylate oxidase activity; GO:0016491 oxidoreductase activity; GO:0016638 oxidoreductase activity, acting on the CH-NH2 group of donors; GO:0016641 oxidoreductase activity, acting on the CH-NH2 group of donors, oxygen as acceptor; GO:0043167 ion binding; GO:0043169 cation binding;…	K05933	E1.14.17.4; aminocyclopropanecarboxylate oxidase [EC:1.14.17.4]	map00270 Cysteine and methionine metabolism; map01100 Metabolic pathways; map01110 Biosynthesis of secondary metabolites	PF03171	2OG-Fe(II) oxygenase superfamily
TRINITY_DN4822_c0_g1	hypothetical protein TSUD_275180	0.627	Down	0.0131433	---	55.212	1.119	0.935	1.201	0.637	0.61	0.793	0.871	1.462	1.132	1.404	0.978	0.86	nucleus
TRINITY_DN5125_c0_g1	UDP-N-acetylglucosamine diphosphorylase 1-like	0.546	Down	8.1645e-05	---	54.431	1.343	1.268	1.421	0.709	0.747	0.746	0.978	1.104	1.096	1.013	0.777	0.685	chloroplast	GO:0000003 reproduction; GO:0003006 developmental process involved in reproduction; GO:0006011 UDP-glucose metabolic process; GO:0006040 amino sugar metabolic process; GO:0006047 UDP-N-acetylglucosamine metabolic process; GO:0006048 UDP-N-acetylglucosamine biosynthetic process; GO:0006139 nucleobase-containing compound metabolic process; GO:0006725 cellular aromatic compound metabolic process; GO…	GO:0005622 intracellular; GO:0005623 cell; GO:0005737 cytoplasm; GO:0005829 cytosol; GO:0005886 plasma membrane; GO:0016020 membrane; GO:0044424 intracellular part; GO:0044444 cytoplasmic part; GO:0044464 cell part; GO:0071944 cell periphery;	GO:0003824 catalytic activity; GO:0003977 UDP-N-acetylglucosamine diphosphorylase activity; GO:0003983 UTP:glucose-1-phosphate uridylyltransferase activity; GO:0016740 transferase activity; GO:0016772 transferase activity, transferring phosphorus-containing groups; GO:0016779 nucleotidyltransferase activity; GO:0051748 UTP-monosaccharide-1-phosphate uridylyltransferase activity; GO:0052630 UDP-N-…	K00972	UAP1; UDP-N-acetylglucosamine/UDP-N-acetylgalactosamine diphosphorylase [EC:2.7.7.23 2.7.7.83]	map00520 Amino sugar and nucleotide sugar metabolism; map01100 Metabolic pathways
TRINITY_DN15478_c0_g1	bifunctional dTDP-4-dehydrorhamnose 3,5-epimerase/dTDP-4-dehydrorhamnose reductase	0.357	Down	0.0034359	---	33.556	1.811	1.519	1.544	0.554	0.752	0.432	1.083	1.151	1.41	0.517	0.54	0.498	cytoplasm	GO:0006139 nucleobase-containing compound metabolic process; GO:0006725 cellular aromatic compound metabolic process; GO:0006793 phosphorus metabolic process; GO:0006807 nitrogen compound metabolic process; GO:0006810 transport; GO:0008152 metabolic process; GO:0009058 biosynthetic process; GO:0009225 nucleotide-sugar metabolic process; GO:0009226 nucleotide-sugar biosynthetic process; GO:0009812…	GO:0005622 intracellular; GO:0005623 cell; GO:0005737 cytoplasm; GO:0005829 cytosol; GO:0005911 cell-cell junction; GO:0009506 plasmodesma; GO:0030054 cell junction; GO:0044424 intracellular part; GO:0044444 cytoplasmic part; GO:0044464 cell part; GO:0055044 symplast;	GO:0003824 catalytic activity; GO:0010280 UDP-L-rhamnose synthase activity; GO:0016829 lyase activity; GO:0016835 carbon-oxygen lyase activity; GO:0016836 hydro-lyase activity; GO:0050377 UDP-glucose 4,6-dehydratase activity;	K12451	UER1; 3,5-epimerase/4-reductase [EC:5.1.3.- 1.1.1.-]	map00520 Amino sugar and nucleotide sugar metabolism; map01100 Metabolic pathways	PF04321	RmlD substrate binding domain
TRINITY_DN10713_c0_g1	hypothetical protein TSUD_389660	0.507	Down	0.0059825	---	34.382	1.664	1.332	1.456	0.621	0.912	0.726	0.877	1.232	1.295	0.799	0.546	0.618	cytoplasm		GO:0005622 intracellular; GO:0005623 cell; GO:0043226 organelle; GO:0043227 membrane-bounded organelle; GO:0043229 intracellular organelle; GO:0043231 intracellular membrane-bounded organelle; GO:0044424 intracellular part; GO:0044464 cell part;	GO:0003824 catalytic activity; GO:0008194 UDP-glycosyltransferase activity; GO:0016740 transferase activity; GO:0016757 transferase activity, transferring glycosyl groups; GO:0016758 transferase activity, transferring hexosyl groups; GO:0035251 UDP-glucosyltransferase activity; GO:0046527 glucosyltransferase activity; GO:0080043 quercetin 3-O-glucosyltransferase activity; GO:0080044 quercetin 7-O…	K18823	UGT91H4; soyasaponin III rhamnosyltransferase [EC:2.4.1.273]
TRINITY_DN2827_c0_g1	hypothetical protein TSUD_226790	0.605	Down	0.00028358	---	74.045	1.447	1.278	1.421	0.819	0.864	0.825	1.055	1.068	0.854	0.66	0.731	0.816	cytoplasm	GO:0001676 long-chain fatty acid metabolic process; GO:0006082 organic acid metabolic process; GO:0006629 lipid metabolic process; GO:0006631 fatty acid metabolic process; GO:0006635 fatty acid beta-oxidation; GO:0006950 response to stress; GO:0008152 metabolic process; GO:0009056 catabolic process; GO:0009058 biosynthetic process; GO:0009062 fatty acid catabolic process; GO:0009605 response to e…	GO:0005622 intracellular; GO:0005623 cell; GO:0005737 cytoplasm; GO:0005777 peroxisome; GO:0005911 cell-cell junction; GO:0009506 plasmodesma; GO:0030054 cell junction; GO:0042579 microbody; GO:0043226 organelle; GO:0043227 membrane-bounded organelle; GO:0043229 intracellular organelle; GO:0043231 intracellular membrane-bounded organelle; GO:0044424 intracellular part; GO:0044444 cytoplasmic part…	GO:0000166 nucleotide binding; GO:0003824 catalytic activity; GO:0003995 acyl-CoA dehydrogenase activity; GO:0003997 acyl-CoA oxidase activity; GO:0005488 binding; GO:0016491 oxidoreductase activity; GO:0016627 oxidoreductase activity, acting on the CH-CH group of donors; GO:0016634 oxidoreductase activity, acting on the CH-CH group of donors, oxygen as acceptor; GO:0036094 small molecule binding…	K00232	E1.3.3.6, ACOX1, ACOX3; acyl-CoA oxidase [EC:1.3.3.6]	map00071 Fatty acid degradation; map00410 beta-Alanine metabolism; map00592 alpha-Linolenic acid metabolism; map00640 Propanoate metabolism; map01040 Biosynthesis of unsaturated fatty acids; map01100 Metabolic pathways; map01110 Biosynthesis of secondary metabolites; map01200 Carbon metabolism; map01212 Fatty acid metabolism; map04146 Peroxisome	PF02770	Acyl-CoA dehydrogenase, middle domain
TRINITY_DN958_c0_g1	lipoxygenase	0.278	Down	0.00038046	---	66.028	2.16	1.564	1.696	0.474	0.566	0.465	0.777	1.26	1.355	0.514	0.491	0.359	cytoplasm		GO:0005622 intracellular; GO:0005623 cell; GO:0005737 cytoplasm; GO:0044424 intracellular part; GO:0044464 cell part;		K15718	LOX1_5; linoleate 9S-lipoxygenase [EC:1.13.11.58]	map00591 Linoleic acid metabolism	PF00305	Lipoxygenase
TRINITY_DN11633_c0_g1	RecName: Full=Chalcone synthase 1; AltName: Full=Naregenin-chalcone synthase 1	0.431	Down	0.002442	---	38.125	1.914	1.692	1.655	0.592	0.869	0.804	0.834	0.644	0.748	0.59	0.782	0.732	cytoplasm	GO:0008152 metabolic process; GO:0009058 biosynthetic process; GO:0009812 flavonoid metabolic process; GO:0009813 flavonoid biosynthetic process; GO:0071704 organic substance metabolic process; GO:1901576 organic substance biosynthetic process;		GO:0003824 catalytic activity; GO:0016210 naringenin-chalcone synthase activity; GO:0016740 transferase activity; GO:0016746 transferase activity, transferring acyl groups; GO:0016747 transferase activity, transferring acyl groups other than amino-acyl groups;	K00660	CHS; chalcone synthase [EC:2.3.1.74]	map00941 Flavonoid biosynthesis; map01100 Metabolic pathways; map01110 Biosynthesis of secondary metabolites; map04712 Circadian rhythm - plant	PF00195; PF02797	Chalcone and stilbene synthases, N-terminal domain; Chalcone and stilbene synthases, C-terminal domain
TRINITY_DN34391_c0_g1	hypothetical protein MtrunA17_Chr1g0192921	0.321	Down	6.2218e-05	---	19.318	1.879	1.623	1.817	0.533	0.624	0.55	1.244	1.236	1.184	0.359	0.33	0.281	cytoplasm
TRINITY_DN36061_c0_g1	hypothetical protein TSUD_364430	0.503	Down	0.0189597	---	18.527	1.403	1.367		0.763	0.63		0.983	1.222		0.847	0.735		cytoplasm							PF00407	Pathogenesis-related protein Bet v I family
TRINITY_DN21644_c0_g1	hypothetical protein TSUD_313280	0.665	Down	0.0177847	---	25.383	1.431	1.285		0.892	0.913		1.303	1.153		0.36	0.624		cytoplasm	GO:0006518 peptide metabolic process; GO:0006575 cellular modified amino acid metabolic process; GO:0006749 glutathione metabolic process; GO:0006751 glutathione catabolic process; GO:0006790 sulfur compound metabolic process; GO:0006807 nitrogen compound metabolic process; GO:0008152 metabolic process; GO:0009056 catabolic process; GO:0009987 cellular process; GO:0010035 response to inorganic su…	GO:0005622 intracellular; GO:0005623 cell; GO:0005737 cytoplasm; GO:0044424 intracellular part; GO:0044464 cell part;	GO:0003824 catalytic activity; GO:0003839 gamma-glutamylcyclotransferase activity; GO:0016829 lyase activity; GO:0016840 carbon-nitrogen lyase activity; GO:0016842 amidine-lyase activity;	K22596	GGCT; gamma-glutamylcyclotransferase, plant [EC:4.3.2.9]	map00480 Glutathione metabolism; map01100 Metabolic pathways
TRINITY_DN22032_c0_g1	EXGT1	0.38	Down	0.0025227	---	34.666	1.877		1.736	0.706		0.666	0.929		1.113	0.413		0.417	chloroplast				K08235	E2.4.1.207; xyloglucan:xyloglucosyl transferase [EC:2.4.1.207]		PF00722	Glycosyl hydrolases family 16
TRINITY_DN5986_c0_g1	lipoxygenase loxN2	0.478	Down	0.0068639	---	65.975	1.705	1.21	1.339	0.581	0.817	0.635	1.061	1.376	1.357	0.636	0.508	0.606	chloroplast				K15718	LOX1_5; linoleate 9S-lipoxygenase [EC:1.13.11.58]	map00591 Linoleic acid metabolism	PF00305	Lipoxygenase
TRINITY_DN5154_c0_g1	L-ascorbate oxidase homolog	0.342	Down	0.00025623	---	60.415	1.782	1.517	1.75	0.564	0.652	0.51	0.961	1.182	1.186	0.582	0.586	0.434	vacuolar membrane							PF07732; PF00394; PF07731	Multicopper oxidase; Multicopper oxidase; Multicopper oxidase
TRINITY_DN24841_c0_g1	RecName: Full=L-ascorbate peroxidase, cytosolic; Short=AP; AltName: Full=PsAPx01	0.324	Down	0.00041847	---	27.109	1.825	1.615	1.786	0.593	0.639	0.462	1.022	1.225	1.145	0.365	0.336	0.435	cytoplasm				K00434	E1.11.1.11; L-ascorbate peroxidase [EC:1.11.1.11]	map00053 Ascorbate and aldarate metabolism; map00480 Glutathione metabolism; map01100 Metabolic pathways	PF00141	Peroxidase
TRINITY_DN13588_c0_g1	epidermis-specific secreted glycoprotein EP1	0.316	Down	0.000196999	---	46.58	1.85	1.546	1.979	0.54	0.62	0.536	1.202	1.337	0.846	0.45	0.439	0.51	extracellular	GO:0006810 transport; GO:0006833 water transport; GO:0042044 fluid transport; GO:0051179 localization; GO:0051234 establishment of localization;	GO:0005576 extracellular region; GO:0005618 cell wall; GO:0005622 intracellular; GO:0005623 cell; GO:0005737 cytoplasm; GO:0005773 vacuole; GO:0005774 vacuolar membrane; GO:0005794 Golgi apparatus; GO:0005829 cytosol; GO:0009505 plant-type cell wall; GO:0012505 endomembrane system; GO:0016020 membrane; GO:0030312 external encapsulating structure; GO:0031090 organelle membrane; GO:0043226 organell…					PF01453	D-mannose binding lectin
TRINITY_DN5722_c0_g1	chorismate synthase chloroplastic-like	0.65	Down	0.0056023	---	46.814	1.361	1.401		0.924	0.872		0.887	0.981		0.843	0.727		chloroplast	GO:0006082 organic acid metabolic process; GO:0006520 cellular amino acid metabolic process; GO:0006725 cellular aromatic compound metabolic process; GO:0006807 nitrogen compound metabolic process; GO:0008152 metabolic process; GO:0008652 cellular amino acid biosynthetic process; GO:0009058 biosynthetic process; GO:0009072 aromatic amino acid family metabolic process; GO:0009073 aromatic amino ac…	GO:0005622 intracellular; GO:0005623 cell; GO:0005634 nucleus; GO:0005730 nucleolus; GO:0005737 cytoplasm; GO:0005829 cytosol; GO:0009507 chloroplast; GO:0009532 plastid stroma; GO:0009536 plastid; GO:0009570 chloroplast stroma; GO:0031974 membrane-enclosed lumen; GO:0031981 nuclear lumen; GO:0043226 organelle; GO:0043227 membrane-bounded organelle; GO:0043228 non-membrane-bounded organelle; GO:0…	GO:0000166 nucleotide binding; GO:0003824 catalytic activity; GO:0004107 chorismate synthase activity; GO:0005488 binding; GO:0010181 FMN binding; GO:0016829 lyase activity; GO:0016835 carbon-oxygen lyase activity; GO:0016838 carbon-oxygen lyase activity, acting on phosphates; GO:0032553 ribonucleotide binding; GO:0036094 small molecule binding; GO:0043167 ion binding; GO:0043168 anion binding; G…	K01736	aroC; chorismate synthase [EC:4.2.3.5]	map00400 Phenylalanine, tyrosine and tryptophan biosynthesis; map01100 Metabolic pathways; map01110 Biosynthesis of secondary metabolites; map01230 Biosynthesis of amino acids
TRINITY_DN3475_c0_g1	glucose-6-phosphate 1-dehydrogenase, cytoplasmic isoform-like	0.445	Down	0.00063595	---	59.13	1.761	1.488	1.428	0.666	0.768	0.646	0.777	1.069	1.091	0.706	0.668	0.729	cytoplasm	GO:0005975 carbohydrate metabolic process; GO:0005996 monosaccharide metabolic process; GO:0006006 glucose metabolic process; GO:0006081 cellular aldehyde metabolic process; GO:0006098 pentose-phosphate shunt; GO:0006139 nucleobase-containing compound metabolic process; GO:0006725 cellular aromatic compound metabolic process; GO:0006732 coenzyme metabolic process; GO:0006733 oxidoreduction coenzy…	GO:0005622 intracellular; GO:0005623 cell; GO:0005737 cytoplasm; GO:0005829 cytosol; GO:0009507 chloroplast; GO:0009536 plastid; GO:0043226 organelle; GO:0043227 membrane-bounded organelle; GO:0043229 intracellular organelle; GO:0043231 intracellular membrane-bounded organelle; GO:0044424 intracellular part; GO:0044444 cytoplasmic part; GO:0044464 cell part;	GO:0003824 catalytic activity; GO:0004345 glucose-6-phosphate dehydrogenase activity; GO:0016491 oxidoreductase activity; GO:0016614 oxidoreductase activity, acting on CH-OH group of donors; GO:0016616 oxidoreductase activity, acting on the CH-OH group of donors, NAD or NADP as acceptor;	K00036	G6PD, zwf; glucose-6-phosphate 1-dehydrogenase [EC:1.1.1.49 1.1.1.363]	map00030 Pentose phosphate pathway; map00480 Glutathione metabolism; map01100 Metabolic pathways; map01110 Biosynthesis of secondary metabolites; map01200 Carbon metabolism	PF00479; PF02781	Glucose-6-phosphate dehydrogenase, NAD binding domain; Glucose-6-phosphate dehydrogenase, C-terminal domain
TRINITY_DN15066_c0_g1	cycloartenol-C-24-methyltransferase isoform X2	0.617	Down	0.0040005	---	44.877	1.36	1.357	1.505	0.915	0.946	0.746	0.978	1.096	1.115	0.758	0.575	0.563	cytoplasm	GO:0000003 reproduction; GO:0003006 developmental process involved in reproduction; GO:0006629 lipid metabolic process; GO:0006694 steroid biosynthetic process; GO:0007275 multicellular organism development; GO:0008152 metabolic process; GO:0008202 steroid metabolic process; GO:0008610 lipid biosynthetic process; GO:0009058 biosynthetic process; GO:0009790 embryo development; GO:0009791 post-embr…	GO:0005622 intracellular; GO:0005623 cell; GO:0005737 cytoplasm; GO:0005773 vacuole; GO:0005783 endoplasmic reticulum; GO:0005911 cell-cell junction; GO:0009506 plasmodesma; GO:0012505 endomembrane system; GO:0030054 cell junction; GO:0043226 organelle; GO:0043227 membrane-bounded organelle; GO:0043229 intracellular organelle; GO:0043231 intracellular membrane-bounded organelle; GO:0044424 intrac…	GO:0003824 catalytic activity; GO:0003838 sterol 24-C-methyltransferase activity; GO:0008168 methyltransferase activity; GO:0008169 C-methyltransferase activity; GO:0008757 S-adenosylmethionine-dependent methyltransferase activity; GO:0016740 transferase activity; GO:0016741 transferase activity, transferring one-carbon groups;	K00559	SMT1, ERG6; sterol 24-C-methyltransferase [EC:2.1.1.41]	map00100 Steroid biosynthesis; map01100 Metabolic pathways; map01110 Biosynthesis of secondary metabolites	PF08241	Methyltransferase domain
TRINITY_DN938_c0_g1	lipoxygenase	0.204	Down	2.4522e-05	---	97.293	2.227	2.03	2.144	0.478	0.452	0.379	0.582	0.862	0.908	0.583	0.443	0.381	cytoplasm				K15718	LOX1_5; linoleate 9S-lipoxygenase [EC:1.13.11.58]	map00591 Linoleic acid metabolism	PF01477; PF00305	PLAT/LH2 domain; Lipoxygenase
TRINITY_DN11080_c0_g1	arogenate dehydratase 3, chloroplastic-like	0.636	Down	0.0031956	---	51.204	1.318	1.34		0.825	0.866		1.044	1.01		0.82	0.771		chloroplast	GO:0006082 organic acid metabolic process; GO:0006520 cellular amino acid metabolic process; GO:0006558 L-phenylalanine metabolic process; GO:0006570 tyrosine metabolic process; GO:0006571 tyrosine biosynthetic process; GO:0006725 cellular aromatic compound metabolic process; GO:0006807 nitrogen compound metabolic process; GO:0008152 metabolic process; GO:0008652 cellular amino acid biosynthetic …	GO:0005622 intracellular; GO:0005623 cell; GO:0005737 cytoplasm; GO:0005829 cytosol; GO:0009507 chloroplast; GO:0009536 plastid; GO:0043226 organelle; GO:0043227 membrane-bounded organelle; GO:0043229 intracellular organelle; GO:0043231 intracellular membrane-bounded organelle; GO:0044424 intracellular part; GO:0044444 cytoplasmic part; GO:0044464 cell part;	GO:0003824 catalytic activity; GO:0016829 lyase activity; GO:0016835 carbon-oxygen lyase activity; GO:0016836 hydro-lyase activity; GO:0047769 arogenate dehydratase activity;	K05359	ADT, PDT; arogenate/prephenate dehydratase [EC:4.2.1.91 4.2.1.51]	map00400 Phenylalanine, tyrosine and tryptophan biosynthesis; map01100 Metabolic pathways; map01110 Biosynthesis of secondary metabolites; map01230 Biosynthesis of amino acids
TRINITY_DN6086_c0_g1	tubulin alpha-3 chain	0.629	Down	0.0056241	---	32.244	1.418	1.275	1.175	0.708	0.876	0.849	1.164	1.052	1.05	0.694	0.717	0.868	cytoplasm				K07374	TUBA; tubulin alpha	map04145 Phagosome	PF00091; PF03953	Tubulin/FtsZ family, GTPase domain; Tubulin C-terminal domain
TRINITY_DN13913_c0_g1	auxin-induced protein pcnt115	0.586	Down	0.0138367	---	37.989	1.562		1.44	0.836		0.922	0.774		0.8	0.818		0.809	nucleus							PF00248	Aldo/keto reductase family
TRINITY_DN854_c0_g1	lipoxygenase	0.225	Down	0.00108312	---	96.706	2.136	1.817	2.119	0.605	0.43	0.334	0.713	1.283	0.996	0.57	0.368	0.304	cytoplasm		GO:0005622 intracellular; GO:0005623 cell; GO:0005737 cytoplasm; GO:0044424 intracellular part; GO:0044464 cell part;		K15718	LOX1_5; linoleate 9S-lipoxygenase [EC:1.13.11.58]	map00591 Linoleic acid metabolism	PF01477; PF00305	PLAT/LH2 domain; Lipoxygenase
TRINITY_DN2327_c0_g1	hypothetical protein TSUD_107360	0.527	Down	0.00184006	---	66.183	1.539	1.36	1.55	0.775	0.889	0.681	1.088	1.041	1.15	0.574	0.539	0.438	cytoplasm		GO:0005623 cell; GO:0005886 plasma membrane; GO:0016020 membrane; GO:0044464 cell part; GO:0071944 cell periphery;	GO:0005215 transporter activity;	K06185	ABCF2; ATP-binding cassette, subfamily F, member 2		PF00005; PF12848	ABC transporter; ABC transporter
TRINITY_DN4744_c0_g1	UDP-glucuronate 4-epimerase 6	0.513	Down	0.0045377	---	50.017	1.544	1.241	1.342	0.85	0.642	0.626	1.261	1.637	1.524	0.317	0.396	0.532	cytoplasm	GO:0005975 carbohydrate metabolic process; GO:0005996 monosaccharide metabolic process; GO:0006063 uronic acid metabolic process; GO:0006082 organic acid metabolic process; GO:0006950 response to stress; GO:0006952 defense response; GO:0008152 metabolic process; GO:0009058 biosynthetic process; GO:0009605 response to external stimulus; GO:0009607 response to biotic stimulus; GO:0009617 response t…	GO:0005622 intracellular; GO:0005623 cell; GO:0005737 cytoplasm; GO:0005768 endosome; GO:0005794 Golgi apparatus; GO:0005802 trans-Golgi network; GO:0012505 endomembrane system; GO:0031410 cytoplasmic vesicle; GO:0031982 vesicle; GO:0031984 organelle subcompartment; GO:0043226 organelle; GO:0043227 membrane-bounded organelle; GO:0043229 intracellular organelle; GO:0043231 intracellular membrane-b…		K08679	E5.1.3.6; UDP-glucuronate 4-epimerase [EC:5.1.3.6]	map00520 Amino sugar and nucleotide sugar metabolism; map01100 Metabolic pathways
TRINITY_DN9667_c0_g1	hydroxymethylglutaryl-CoA synthase	0.528	Down	0.0029362	---	51.762	1.503	1.307	1.417	0.782	0.832	0.617	1.081	1.242	1.312	0.676	0.577	0.624	nucleus	GO:0006084 acetyl-CoA metabolic process; GO:0006139 nucleobase-containing compound metabolic process; GO:0006163 purine nucleotide metabolic process; GO:0006629 lipid metabolic process; GO:0006637 acyl-CoA metabolic process; GO:0006644 phospholipid metabolic process; GO:0006720 isoprenoid metabolic process; GO:0006725 cellular aromatic compound metabolic process; GO:0006732 coenzyme metabolic pro…	GO:0005622 intracellular; GO:0005623 cell; GO:0005737 cytoplasm; GO:0005829 cytosol; GO:0005911 cell-cell junction; GO:0009506 plasmodesma; GO:0030054 cell junction; GO:0044424 intracellular part; GO:0044444 cytoplasmic part; GO:0044464 cell part; GO:0055044 symplast;	GO:0003824 catalytic activity; GO:0004421 hydroxymethylglutaryl-CoA synthase activity; GO:0016740 transferase activity; GO:0016746 transferase activity, transferring acyl groups; GO:0046912 transferase activity, transferring acyl groups, acyl groups converted into alkyl on transfer;	K01641	E2.3.3.10; hydroxymethylglutaryl-CoA synthase [EC:2.3.3.10]	map00072 Synthesis and degradation of ketone bodies; map00280 Valine, leucine and isoleucine degradation; map00650 Butanoate metabolism; map00900 Terpenoid backbone biosynthesis; map01100 Metabolic pathways; map01110 Biosynthesis of secondary metabolites	PF01154; PF08540	Hydroxymethylglutaryl-coenzyme A synthase N terminal; Hydroxymethylglutaryl-coenzyme A synthase C terminal
TRINITY_DN33639_c0_g1	pathogenesis-related protein 10	0.361	Down	0.0119813	---	16.918	1.755	1.673	1.713	0.652	0.49	0.713	1.078	1.153	0.686	0.575	0.43	0.873	cytoplasm							PF00407	Pathogenesis-related protein Bet v I family
TRINITY_DN1492_c0_g1	uncharacterized protein LOC11416558	0.647	Down	0.023583	---	82.803		1.403	1.379		0.961	0.839		0.866	0.934		0.768	0.819	peroxisome				K00276	AOC3, AOC2, tynA; primary-amine oxidase [EC:1.4.3.21]	map00260 Glycine, serine and threonine metabolism; map00350 Tyrosine metabolism; map00360 Phenylalanine metabolism; map00410 beta-Alanine metabolism; map00950 Isoquinoline alkaloid biosynthesis; map00960 Tropane, piperidine and pyridine alkaloid biosynthesis; map01100 Metabolic pathways; map01110 Biosynthesis of secondary metabolites	PF02727; PF02728; PF01179	Copper amine oxidase, N2 domain; Copper amine oxidase, N3 domain; Copper amine oxidase, enzyme domain
TRINITY_DN2124_c0_g1	hypothetical protein TSUD_351210	0.662	Down	7.7534e-05	---	74.414	1.217	1.178	1.249	0.802	0.83	0.78	1.058	1.133	1.064	0.931	0.758	0.829	plasma membrane	GO:0006873 cellular ion homeostasis; GO:0006875 cellular metal ion homeostasis; GO:0006878 cellular copper ion homeostasis; GO:0006882 cellular zinc ion homeostasis; GO:0009987 cellular process; GO:0019725 cellular homeostasis; GO:0030003 cellular cation homeostasis; GO:0042592 homeostatic process; GO:0046916 cellular transition metal ion homeostasis; GO:0048878 chemical homeostasis; GO:0050801 i…	GO:0005622 intracellular; GO:0005623 cell; GO:0005634 nucleus; GO:0005737 cytoplasm; GO:0005768 endosome; GO:0005773 vacuole; GO:0005774 vacuolar membrane; GO:0005794 Golgi apparatus; GO:0005802 trans-Golgi network; GO:0012505 endomembrane system; GO:0016020 membrane; GO:0016021 integral component of membrane; GO:0031090 organelle membrane; GO:0031224 intrinsic component of membrane; GO:0031410 c…		K17086	TM9SF2_4; transmembrane 9 superfamily member 2/4
TRINITY_DN1187_c0_g1	vitamin B-12-independent methionine synthase	0.591	Down	6.0092e-05	---	84.471	1.265	1.258	1.311	0.795	0.741	0.728	1.049	1.138	1.087	0.893	0.755	0.793	cytoplasm				K00549	metE; 5-methyltetrahydropteroyltriglutamate--homocysteine methyltransferase [EC:2.1.1.14]	map00270 Cysteine and methionine metabolism; map00450 Selenocompound metabolism; map01100 Metabolic pathways; map01110 Biosynthesis of secondary metabolites; map01230 Biosynthesis of amino acids	PF08267; PF01717	Cobalamin-independent synthase, N-terminal domain; Cobalamin-independent synthase, Catalytic domain
TRINITY_DN21058_c0_g1	putative oxoglutarate/iron-dependent dioxygenase, non-heme dioxygenase domain-containing protein	0.5	Down	0.0082841	---	19.895	1.797	1.472	1.897	0.965	0.953	0.665	0.727	0.94	0.906	0.48	0.633	0.411	nucleus
TRINITY_DN63_c0_g1	hypothetical protein TSUD_337480	0.649	Down	0.00014088	---	115.93	1.38	1.323	1.366	0.905	0.903	0.832	1.045	1.089	1.017	0.829	0.621	0.723	plasma membrane				K01537	ATP2C; P-type Ca2+ transporter type 2C [EC:7.2.2.10]		PF00690; PF00702	Cation transporter/ATPase, N-terminus; haloacid dehalogenase-like hydrolase

## Sheet: E_TvsE_CK
Table S1 DEPs in the comparison of E_T_E_CK
Protein accession	Protein description	E_T/E_CK Ratio	Regulated Type	E_T/E_CK P value	Gene name	MW [kDa]	C_CK.C_CK_3	C_CK.C_CK_2	C_CK.C_CK_1	C_T.C_T_3	C_T.C_T_2	C_T.C_T_1	E_CK.E_CK_3	E_CK.E_CK_2	E_CK.E_CK_1	E_T.E_T_3	E_T.E_T_2	E_T.E_T_1	Subcellular localization	Biological Process	Cellular Component	Molecular Function	KEGG KO No.	KEGG Gene	KEGG pathway	Pfam ID	Domain description
TRINITY_DN52465_c0_g1	seed maturation protein	1.693	Up	0.0153167	---	11.209	0.525	0.717	0.627	0.669	0.808	1.114	0.916	0.912	1.01	2.011	1.419	1.376	nucleus	GO:0000003 reproduction; GO:0001101 response to acid chemical; GO:0003006 developmental process involved in reproduction; GO:0006950 response to stress; GO:0006970 response to osmotic stress; GO:0007275 multicellular organism development; GO:0009266 response to temperature stimulus; GO:0009409 response to cold; GO:0009414 response to water deprivation; GO:0009415 response to water; GO:0009628 res…	GO:0005622 intracellular; GO:0005623 cell; GO:0005737 cytoplasm; GO:0005829 cytosol; GO:0044424 intracellular part; GO:0044444 cytoplasmic part; GO:0044464 cell part;	GO:0005488 binding; GO:0005543 phospholipid binding; GO:0008289 lipid binding; GO:0030246 carbohydrate binding; GO:0031210 phosphatidylcholine binding; GO:0043167 ion binding; GO:0043168 anion binding; GO:0043169 cation binding; GO:0048030 disaccharide binding; GO:0050997 quaternary ammonium group binding; GO:0070405 ammonium ion binding; GO:0070492 oligosaccharide binding;
TRINITY_DN31990_c0_g1	PREDICTED: protein SLE1	2.708	Up	0.000159242	---	12.338	0.492	0.516	0.48	0.993	1.271	1.33	0.722	0.607	0.621	1.866	1.814	1.6	nucleus	GO:0000003 reproduction; GO:0001101 response to acid chemical; GO:0003006 developmental process involved in reproduction; GO:0007275 multicellular organism development; GO:0009719 response to endogenous stimulus; GO:0009725 response to hormone; GO:0009737 response to abscisic acid; GO:0009791 post-embryonic development; GO:0010033 response to organic substance; GO:0010154 fruit development; GO:00…	GO:0005622 intracellular; GO:0005623 cell; GO:0005737 cytoplasm; GO:0005829 cytosol; GO:0044424 intracellular part; GO:0044444 cytoplasmic part; GO:0044464 cell part;
TRINITY_DN32624_c0_g1	late embryogenesis abundant protein D-34	4.262	Up	0.00064376	---	18.317	0.578	0.572	0.45	0.74	0.623	1.206	0.432	0.506	0.621	2.374	2.501	1.77	nucleus	GO:0006873 cellular ion homeostasis; GO:0007275 multicellular organism development; GO:0009791 post-embryonic development; GO:0009845 seed germination; GO:0009987 cellular process; GO:0010035 response to inorganic substance; GO:0010038 response to metal ion; GO:0010226 response to lithium ion; GO:0019725 cellular homeostasis; GO:0032501 multicellular organismal process; GO:0032502 developmental p…	GO:0005622 intracellular; GO:0005623 cell; GO:0005634 nucleus; GO:0005730 nucleolus; GO:0005737 cytoplasm; GO:0005829 cytosol; GO:0031974 membrane-enclosed lumen; GO:0031981 nuclear lumen; GO:0043226 organelle; GO:0043227 membrane-bounded organelle; GO:0043228 non-membrane-bounded organelle; GO:0043229 intracellular organelle; GO:0043231 intracellular membrane-bounded organelle; GO:0043232 intrac…
TRINITY_DN30450_c0_g1	18 kDa seed maturation protein	1.762	Up	0.007519	---	20.043	0.702	0.821	0.69	1.3	0.895	1.492	0.693	0.855	0.744	1.442	1.49	1.107	mitochondria	GO:0000003 reproduction; GO:0001101 response to acid chemical; GO:0003006 developmental process involved in reproduction; GO:0006950 response to stress; GO:0006970 response to osmotic stress; GO:0007275 multicellular organism development; GO:0009266 response to temperature stimulus; GO:0009409 response to cold; GO:0009414 response to water deprivation; GO:0009415 response to water; GO:0009628 res…	GO:0005622 intracellular; GO:0005623 cell; GO:0005737 cytoplasm; GO:0005829 cytosol; GO:0044424 intracellular part; GO:0044444 cytoplasmic part; GO:0044464 cell part;	GO:0005488 binding; GO:0005543 phospholipid binding; GO:0008289 lipid binding; GO:0030246 carbohydrate binding; GO:0031210 phosphatidylcholine binding; GO:0043167 ion binding; GO:0043168 anion binding; GO:0043169 cation binding; GO:0048030 disaccharide binding; GO:0050997 quaternary ammonium group binding; GO:0070405 ammonium ion binding; GO:0070492 oligosaccharide binding;
TRINITY_DN11010_c0_g1	uncharacterized protein LOC101512451	1.932	Up	0.046243	---	44.852		0.733	0.413		0.594	0.578		1.059	0.956		1.684	2.209	nucleus
TRINITY_DN44914_c0_g1	uncharacterized protein LOC25499380	2.409	Up	0.00083597	---	13.331	0.491	0.524	0.539	1.188	1.325	1.545	0.75	0.568	0.651	1.523	1.758	1.463	cytoplasm
TRINITY_DN24839_c0_g1	late embryogenesis abundant protein D-34 isoform X2	1.891	Up	0.00057715	---	28.944	0.596	0.629	0.6	1.282	1.415	1.479	0.793	0.647	0.703	1.332	1.418	1.302	cytoplasm
TRINITY_DN27544_c0_g1	dehydrin a	1.581	Up	0.0159219	---	19.682	0.594	0.534	0.583	0.728	0.625	0.861	1.072	0.832	1.058	1.357	1.784	1.542	nucleus
TRINITY_DN10305_c0_g1	hypothetical protein TSUD_269710	2.091	Up	0.0034786	---	50.135	0.459	0.443	0.471	1.083	1.17	1.342	0.917	0.654	0.815	1.627	1.877	1.486	vacuolar membrane							PF13664	Domain of unknown function (DUF4149)
TRINITY_DN13439_c0_g1	unknown	2.754	Up	0.043558	---	39.405		0.471	0.585		1.389	1.338		0.488	0.721		1.839	1.491	nucleus				K13206	CCDC55; coiled-coil domain-containing protein 55
TRINITY_DN4428_c0_g1	seed biotin-containing protein SBP65	1.618	Up	0.00032031	---	62.066	0.672	0.693	0.721	1.037	1.029	1.301	0.873	0.856	0.803	1.375	1.439	1.284	cytoplasm
TRINITY_DN34254_c0_g1	RecName: Full=Legumin type B; Contains: RecName: Full=Legumin type B alpha chain; AltName: Full=Legumin type B acidic chain; Contains: RecName: Full=Legumin type B beta chain; AltName: Full=Legumin type B basic chain	1.511	Up	0.0069244	---	25.229	0.743	0.825	0.905	0.733	0.765	0.956	1.007	0.913	0.917	1.54	1.519	1.228	cytoplasm	GO:0000003 reproduction; GO:0001101 response to acid chemical; GO:0003006 developmental process involved in reproduction; GO:0007275 multicellular organism development; GO:0009719 response to endogenous stimulus; GO:0009725 response to hormone; GO:0009735 response to cytokinin; GO:0009737 response to abscisic acid; GO:0009791 post-embryonic development; GO:0009987 cellular process; GO:0010033 res…	GO:0005622 intracellular; GO:0005623 cell; GO:0005737 cytoplasm; GO:0005773 vacuole; GO:0031410 cytoplasmic vesicle; GO:0031982 vesicle; GO:0033095 aleurone grain; GO:0043226 organelle; GO:0043227 membrane-bounded organelle; GO:0043229 intracellular organelle; GO:0043231 intracellular membrane-bounded organelle; GO:0044424 intracellular part; GO:0044444 cytoplasmic part; GO:0044464 cell part; GO:…	GO:0045735 nutrient reservoir activity;				PF00190	Cupin
TRINITY_DN12139_c0_g1	late embryogenesis abundant protein At3g53040	1.505	Up	0.0025236	---	47.062	0.67	0.721	0.713	0.914	1.192	1.335	0.944	0.904	0.818	1.447	1.316	1.248	nucleus	GO:0000003 reproduction; GO:0003006 developmental process involved in reproduction; GO:0007275 multicellular organism development; GO:0009791 post-embryonic development; GO:0009838 abscission; GO:0009908 flower development; GO:0010227 floral organ abscission; GO:0022414 reproductive process; GO:0032501 multicellular organismal process; GO:0032502 developmental process; GO:0048367 shoot system dev…	GO:0005622 intracellular; GO:0005623 cell; GO:0005737 cytoplasm; GO:0005829 cytosol; GO:0044424 intracellular part; GO:0044444 cytoplasmic part; GO:0044464 cell part;
TRINITY_DN37721_c0_g1	late embryogenesis abundant protein D-34	3.14	Up	0.00147936	---	13.986	0.405	0.363	0.389	1.526	1.477	1.644	0.651	0.415	0.501	1.442	1.847	1.632	nucleus
TRINITY_DN41361_c0_g1	oleosin	1.622	Up	0.008878	---	17.066	0.509	0.617	0.449	1.052	1.339	1.157	0.928	0.778	1.057	1.648	1.392	1.442	chloroplast
TRINITY_DN24008_c0_g1	hypothetical protein MTR_2g105710	1.99	Up	0.00101658	---	18.139	0.618	0.593	0.797	1.091	0.959	1.049	0.819	0.762	0.837	1.592	1.817	1.404	nucleus							PF00067	Cytochrome P450
TRINITY_DN15370_c0_g1	dehydrin 2	1.805	Up	0.027016	---	22.794	0.593	0.663	0.761	0.824	0.811	1.369	0.663	0.993	0.805	1.844	1.406	1.193	nucleus
TRINITY_DN18701_c0_g1	late embryogenesis abundant protein D-34	5.469	Up	0.0030443	---	27.335	0.341	0.19		0.343	0.155		0.594	0.537		2.848	3.337		chloroplast	GO:0006873 cellular ion homeostasis; GO:0007275 multicellular organism development; GO:0009791 post-embryonic development; GO:0009845 seed germination; GO:0009987 cellular process; GO:0010035 response to inorganic substance; GO:0010038 response to metal ion; GO:0010226 response to lithium ion; GO:0019725 cellular homeostasis; GO:0032501 multicellular organismal process; GO:0032502 developmental p…	GO:0005622 intracellular; GO:0005623 cell; GO:0005634 nucleus; GO:0005730 nucleolus; GO:0005737 cytoplasm; GO:0005829 cytosol; GO:0031974 membrane-enclosed lumen; GO:0031981 nuclear lumen; GO:0043226 organelle; GO:0043227 membrane-bounded organelle; GO:0043228 non-membrane-bounded organelle; GO:0043229 intracellular organelle; GO:0043231 intracellular membrane-bounded organelle; GO:0043232 intrac…
TRINITY_DN14876_c0_g1	protein DJ-1 homolog D	1.541	Up	0.046997	---	33.619	0.895		0.924	0.833		1.014	0.9		0.822	1.44		1.214	chloroplast	GO:0006081 cellular aldehyde metabolic process; GO:0006082 organic acid metabolic process; GO:0006089 lactate metabolic process; GO:0008152 metabolic process; GO:0009056 catabolic process; GO:0009058 biosynthetic process; GO:0009438 methylglyoxal metabolic process; GO:0009987 cellular process; GO:0016053 organic acid biosynthetic process; GO:0019249 lactate biosynthetic process; GO:0019752 carbox…		GO:0003824 catalytic activity; GO:0016829 lyase activity; GO:0016835 carbon-oxygen lyase activity; GO:0016836 hydro-lyase activity; GO:0019172 glyoxalase III activity;	K18881	DJ1D; D-lactate dehydratase [EC:4.2.1.130]	map00620 Pyruvate metabolism; map01100 Metabolic pathways	PF01965	DJ-1/PfpI family
TRINITY_DN4478_c0_g1	RecName: Full=Seed biotin-containing protein SBP65; AltName: Full=Seed biotinylated protein of 65 kDa	2.256	Up	0.00063923	---	56.886	0.487	0.508	0.498	1.109	1.234	1.454	0.835	0.692	0.639	1.601	1.724	1.562	cytoplasm,nucleus
TRINITY_DN34157_c0_g1	membrane protein PM19L	2.244	Up	0.00030323	---	19.047	0.458	0.551	0.46	1.385	1.422	1.242	0.605	0.677	0.756	1.493	1.476	1.605	plasma membrane
TRINITY_DN25570_c0_g1	putative Seed maturation protein	2.132	Up	0.0076567	---	26.159	0.597	0.529	0.526	1.127	1.08	1.385	0.951	0.61	0.693	1.413	1.855	1.537	chloroplast	GO:0006873 cellular ion homeostasis; GO:0007275 multicellular organism development; GO:0009791 post-embryonic development; GO:0009845 seed germination; GO:0009987 cellular process; GO:0010035 response to inorganic substance; GO:0010038 response to metal ion; GO:0010226 response to lithium ion; GO:0019725 cellular homeostasis; GO:0032501 multicellular organismal process; GO:0032502 developmental p…	GO:0005622 intracellular; GO:0005623 cell; GO:0005634 nucleus; GO:0005730 nucleolus; GO:0005737 cytoplasm; GO:0005829 cytosol; GO:0031974 membrane-enclosed lumen; GO:0031981 nuclear lumen; GO:0043226 organelle; GO:0043227 membrane-bounded organelle; GO:0043228 non-membrane-bounded organelle; GO:0043229 intracellular organelle; GO:0043231 intracellular membrane-bounded organelle; GO:0043232 intrac…
TRINITY_DN28788_c0_g1	putative Seed maturation protein	2.445	Up	0.00056339	---	22.142	0.479	0.524	0.483	1.162	1.193	1.516	0.765	0.686	0.575	1.683	1.729	1.541	nucleus
TRINITY_DN19476_c0_g1	dehydrin	3.308	Up	0.0134793	---	19.634	0.561	0.268	0.414	0.989	0.254	0.361	0.415	1.151	0.669	2.176	2.451	2.766	nucleus
TRINITY_DN41876_c0_g1	protein SLE2	4.269	Up	0.00038259	---	10.596	0.398	0.41	0.357	1.409	1.697	2.005	0.457	0.312	0.404	1.818	1.742	1.448	nucleus	GO:0000003 reproduction; GO:0001101 response to acid chemical; GO:0003006 developmental process involved in reproduction; GO:0007275 multicellular organism development; GO:0009719 response to endogenous stimulus; GO:0009725 response to hormone; GO:0009737 response to abscisic acid; GO:0009791 post-embryonic development; GO:0010033 response to organic substance; GO:0010154 fruit development; GO:00…	GO:0005622 intracellular; GO:0005623 cell; GO:0005737 cytoplasm; GO:0005829 cytosol; GO:0044424 intracellular part; GO:0044444 cytoplasmic part; GO:0044464 cell part;	GO:0003676 nucleic acid binding; GO:0003677 DNA binding; GO:0005488 binding; GO:0097159 organic cyclic compound binding; GO:1901363 heterocyclic compound binding;
TRINITY_DN52122_c0_g1	seed maturation protein	2.183	Up	0.00032209	---	13.964	0.467	0.453		1.109	1.217		0.763	0.782		1.675	1.698		nucleus	GO:0000003 reproduction; GO:0001101 response to acid chemical; GO:0003006 developmental process involved in reproduction; GO:0006950 response to stress; GO:0006970 response to osmotic stress; GO:0007275 multicellular organism development; GO:0009414 response to water deprivation; GO:0009415 response to water; GO:0009628 response to abiotic stimulus; GO:0009791 post-embryonic development; GO:00100…	GO:0005622 intracellular; GO:0005623 cell; GO:0005737 cytoplasm; GO:0005829 cytosol; GO:0005911 cell-cell junction; GO:0009506 plasmodesma; GO:0030054 cell junction; GO:0044424 intracellular part; GO:0044444 cytoplasmic part; GO:0044464 cell part; GO:0055044 symplast;
TRINITY_DN44372_c0_g1	universal stress protein PHOS32	2.264	Up	0.043382	---	17.396	0.415	0.362	0.444	1.144	1.484	1.471	1.168	0.416	0.652	1.511	1.951	1.601	nucleus		GO:0005623 cell; GO:0005886 plasma membrane; GO:0016020 membrane; GO:0044464 cell part; GO:0071944 cell periphery;	GO:0000166 nucleotide binding; GO:0005488 binding; GO:0008144 drug binding; GO:0016208 AMP binding; GO:0017076 purine nucleotide binding; GO:0030554 adenyl nucleotide binding; GO:0032553 ribonucleotide binding; GO:0032555 purine ribonucleotide binding; GO:0032559 adenyl ribonucleotide binding; GO:0036094 small molecule binding; GO:0043167 ion binding; GO:0043168 anion binding; GO:0043169 cation b…				PF00582	Universal stress protein family
TRINITY_DN12376_c0_g1	hypothetical protein MtrunA17_Chr6g0471181	1.593	Up	0.00048069	---	41.36	0.704	0.636	0.677	1.214	1.214	1.306	0.886	0.828	0.816	1.283	1.443	1.304	nucleus	GO:0000302 response to reactive oxygen species; GO:0001101 response to acid chemical; GO:0006950 response to stress; GO:0006970 response to osmotic stress; GO:0006972 hyperosmotic response; GO:0006979 response to oxidative stress; GO:0007154 cell communication; GO:0007165 signal transduction; GO:0007275 multicellular organism development; GO:0007568 aging; GO:0007623 circadian rhythm; GO:0009266 …	GO:0005622 intracellular; GO:0005623 cell; GO:0005737 cytoplasm; GO:0044424 intracellular part; GO:0044464 cell part;		K23450	HRC; sarcoplasmic reticulum histidine-rich calcium-binding protein
TRINITY_DN20760_c0_g1	probable 2-oxoglutarate-dependent dioxygenase AOP1	0.345	Down	0.0170785	---	23.923	0.938	1.006		0.89	0.622		1.704	1.657		0.499	0.662		peroxisome							PF03171	2OG-Fe(II) oxygenase superfamily
TRINITY_DN804_c0_g1	alkaline alpha-galactosidase	0.631	Down	0.021521	---	41.926	1.203	0.931	0.679	0.83	1.17	0.886	1.157	1.12	1.587	0.817	0.737	0.884	mitochondria	GO:0005975 carbohydrate metabolic process; GO:0006950 response to stress; GO:0006979 response to oxidative stress; GO:0008152 metabolic process; GO:0009056 catabolic process; GO:0009311 oligosaccharide metabolic process; GO:0009313 oligosaccharide catabolic process; GO:0009628 response to abiotic stimulus; GO:0016052 carbohydrate catabolic process; GO:0033530 raffinose metabolic process; GO:00344…	GO:0005911 cell-cell junction; GO:0009506 plasmodesma; GO:0030054 cell junction; GO:0055044 symplast;	GO:0003824 catalytic activity; GO:0004553 hydrolase activity, hydrolyzing O-glycosyl compounds; GO:0004557 alpha-galactosidase activity; GO:0015925 galactosidase activity; GO:0016787 hydrolase activity; GO:0016798 hydrolase activity, acting on glycosyl bonds; GO:0052692 raffinose alpha-galactosidase activity;	K06617	E2.4.1.82; raffinose synthase [EC:2.4.1.82]	map00052 Galactose metabolism; map01100 Metabolic pathways
TRINITY_DN8983_c0_g1	apyrase S-type	0.393	Down	0.0066377	---	50.252		2.13	2.009		0.412	0.425		0.895	1.039		0.386	0.374	chloroplast	GO:0000003 reproduction; GO:0009846 pollen germination; GO:0009856 pollination; GO:0022414 reproductive process; GO:0032501 multicellular organismal process; GO:0044706 multi-multicellular organism process; GO:0051704 multi-organism process;	GO:0005622 intracellular; GO:0005623 cell; GO:0005737 cytoplasm; GO:0005768 endosome; GO:0005794 Golgi apparatus; GO:0005802 trans-Golgi network; GO:0012505 endomembrane system; GO:0016020 membrane; GO:0016021 integral component of membrane; GO:0031224 intrinsic component of membrane; GO:0031410 cytoplasmic vesicle; GO:0031982 vesicle; GO:0031984 organelle subcompartment; GO:0043226 organelle; GO…	GO:0003824 catalytic activity; GO:0004382 guanosine-diphosphatase activity; GO:0016462 pyrophosphatase activity; GO:0016787 hydrolase activity; GO:0016817 hydrolase activity, acting on acid anhydrides; GO:0016818 hydrolase activity, acting on acid anhydrides, in phosphorus-containing anhydrides; GO:0017110 nucleoside-diphosphatase activity; GO:0045134 uridine-diphosphatase activity;	K14641	APY1_2; apyrase [EC:3.6.1.5]	map00230 Purine metabolism; map00240 Pyrimidine metabolism; map01100 Metabolic pathways
TRINITY_DN27650_c0_g1	disease resistance protein (TIR-NBS-LRR class)	0.645	Down	0.040939	---	18.423	1.632		1.639	0.546		0.649	1.124		0.947	0.647		0.688	nucleus
TRINITY_DN21898_c0_g1	V-type proton ATPase subunit E isoform X2	0.49	Down	0.0034797	---	27.659	1.987	1.581	1.447	0.539	0.722	0.661	0.915	1.127	1.21	0.472	0.505	0.615	cytoplasm	GO:0000003 reproduction; GO:0003006 developmental process involved in reproduction; GO:0006810 transport; GO:0006811 ion transport; GO:0006812 cation transport; GO:0006950 response to stress; GO:0006952 defense response; GO:0006970 response to osmotic stress; GO:0006996 organelle organization; GO:0007030 Golgi organization; GO:0007275 multicellular organism development; GO:0009266 response to tem…	GO:0000325 plant-type vacuole; GO:0005622 intracellular; GO:0005623 cell; GO:0005737 cytoplasm; GO:0005773 vacuole; GO:0005774 vacuolar membrane; GO:0005794 Golgi apparatus; GO:0005829 cytosol; GO:0005840 ribosome; GO:0005844 polysome; GO:0009705 plant-type vacuole membrane; GO:0012505 endomembrane system; GO:0016020 membrane; GO:0022626 cytosolic ribosome; GO:0031090 organelle membrane; GO:00329…	GO:0003735 structural constituent of ribosome; GO:0003824 catalytic activity; GO:0005198 structural molecule activity; GO:0005215 transporter activity; GO:0008324 cation transmembrane transporter activity; GO:0015075 ion transmembrane transporter activity; GO:0015077 monovalent inorganic cation transmembrane transporter activity; GO:0015078 hydrogen ion transmembrane transporter activity; GO:0015…	K02150	ATPeV1E, ATP6E; V-type H+-transporting ATPase subunit E	map00190 Oxidative phosphorylation; map01100 Metabolic pathways; map04145 Phagosome
TRINITY_DN4231_c0_g1	pectinesterase-like	0.381	Down	9.8523e-05	---	60.533	1.882	1.803		0.473	0.547		1.132	1.121		0.426	0.433		endoplasmic reticulum	GO:0009605 response to external stimulus; GO:0009607 response to biotic stimulus; GO:0009617 response to bacterium; GO:0043086 negative regulation of catalytic activity; GO:0043207 response to external biotic stimulus; GO:0044092 negative regulation of molecular function; GO:0050790 regulation of catalytic activity; GO:0050896 response to stimulus; GO:0051704 multi-organism process; GO:0051707 re…	GO:0005618 cell wall; GO:0005622 intracellular; GO:0005623 cell; GO:0005737 cytoplasm; GO:0005773 vacuole; GO:0005774 vacuolar membrane; GO:0005829 cytosol; GO:0016020 membrane; GO:0030312 external encapsulating structure; GO:0031090 organelle membrane; GO:0043226 organelle; GO:0043227 membrane-bounded organelle; GO:0043229 intracellular organelle; GO:0043231 intracellular membrane-bounded organe…	GO:0003824 catalytic activity; GO:0004857 enzyme inhibitor activity; GO:0016787 hydrolase activity; GO:0016788 hydrolase activity, acting on ester bonds; GO:0030234 enzyme regulator activity; GO:0030599 pectinesterase activity; GO:0046910 pectinesterase inhibitor activity; GO:0052689 carboxylic ester hydrolase activity; GO:0098772 molecular function regulator;	K01051	E3.1.1.11; pectinesterase [EC:3.1.1.11]	map00040 Pentose and glucuronate interconversions; map01100 Metabolic pathways	PF04043	Plant invertase/pectin methylesterase inhibitor
TRINITY_DN1899_c0_g1	D-3-phosphoglycerate dehydrogenase chloroplastic-like	0.468	Down	0.00056276	---	65.868	1.762	1.452	1.465	0.638	0.843	0.639	0.997	1.152	1.27	0.547	0.504	0.549	chloroplast		GO:0005622 intracellular; GO:0005623 cell; GO:0005634 nucleus; GO:0005737 cytoplasm; GO:0005829 cytosol; GO:0009507 chloroplast; GO:0009532 plastid stroma; GO:0009536 plastid; GO:0009570 chloroplast stroma; GO:0043226 organelle; GO:0043227 membrane-bounded organelle; GO:0043229 intracellular organelle; GO:0043231 intracellular membrane-bounded organelle; GO:0044422 organelle part; GO:0044424 intr…		K00058	serA, PHGDH; D-3-phosphoglycerate dehydrogenase / 2-oxoglutarate reductase [EC:1.1.1.95 1.1.1.399]	map00260 Glycine, serine and threonine metabolism; map00270 Cysteine and methionine metabolism; map01100 Metabolic pathways; map01200 Carbon metabolism; map01230 Biosynthesis of amino acids	PF00389; PF02826; PF01842	D-isomer specific 2-hydroxyacid dehydrogenase, catalytic domain; D-isomer specific 2-hydroxyacid dehydrogenase, NAD binding domain; ACT domain
TRINITY_DN40670_c0_g1	hypothetical protein TSUD_09880	0.506	Down	0.00026008	---	21.49	1.16	1.13	1.255	1.197	1.07	0.908	1.116	1.152	1.242	0.572	0.647	0.557	mitochondria	GO:0001666 response to hypoxia; GO:0006810 transport; GO:0006950 response to stress; GO:0009628 response to abiotic stimulus; GO:0009719 response to endogenous stimulus; GO:0009725 response to hormone; GO:0009733 response to auxin; GO:0010033 response to organic substance; GO:0015669 gas transport; GO:0015671 oxygen transport; GO:0015893 drug transport; GO:0036293 response to decreased oxygen lev…		GO:0005344 oxygen transporter activity;				PF01152	Bacterial-like globin
TRINITY_DN6670_c0_g1	beta-amyrin 24-hydroxylase CYP93E7	0.399	Down	0.0137777	---	61.318		1.105	1.143		0.994	0.684		1.359	1.506		0.517	0.627	chloroplast	GO:0008152 metabolic process; GO:0009058 biosynthetic process; GO:0019748 secondary metabolic process; GO:0044550 secondary metabolite biosynthetic process; GO:0055114 oxidation-reduction process;	GO:0016020 membrane;	GO:0003824 catalytic activity; GO:0004497 monooxygenase activity; GO:0016491 oxidoreductase activity; GO:0016705 oxidoreductase activity, acting on paired donors, with incorporation or reduction of molecular oxygen; GO:0016709 oxidoreductase activity, acting on paired donors, with incorporation or reduction of molecular oxygen, NAD(P)H as one donor, and incorporation of one atom of oxygen;	K15814	CYP93E1; beta-amyrin 24-hydroxylase [EC:1.14.14.134]	map00909 Sesquiterpenoid and triterpenoid biosynthesis; map01110 Biosynthesis of secondary metabolites	PF00067	Cytochrome P450
TRINITY_DN15129_c0_g1	protein SRG1	0.627	Down	0.00055807	---	40.534	1.347	1.405	1.474	0.834	0.915	0.768	1.118	1.037	1.028	0.702	0.617	0.676	cytoplasm	GO:0007275 multicellular organism development; GO:0007568 aging; GO:0008152 metabolic process; GO:0010150 leaf senescence; GO:0032501 multicellular organismal process; GO:0032502 developmental process; GO:0048366 leaf development; GO:0048367 shoot system development; GO:0048731 system development; GO:0048827 phyllome development; GO:0048856 anatomical structure development; GO:0055114 oxidation-r…		GO:0003824 catalytic activity; GO:0016491 oxidoreductase activity; GO:0016679 oxidoreductase activity, acting on diphenols and related substances as donors; GO:0016682 oxidoreductase activity, acting on diphenols and related substances as donors, oxygen as acceptor;				PF03171	2OG-Fe(II) oxygenase superfamily
TRINITY_DN16966_c0_g1	1-aminocyclopropane-1-carboxylate oxidase 5	0.327	Down	0.0083443	---	34.93	1.66	1.353	1.483	0.555	0.653	0.344	1.091	1.276	1.721	0.592	0.439	0.304	cytoplasm	GO:0008152 metabolic process; GO:0009058 biosynthetic process; GO:0009692 ethylene metabolic process; GO:0009693 ethylene biosynthetic process; GO:0009987 cellular process; GO:0010817 regulation of hormone levels; GO:0042445 hormone metabolic process; GO:0042446 hormone biosynthetic process; GO:0043449 cellular alkene metabolic process; GO:0043450 alkene biosynthetic process; GO:0044237 cellular …		GO:0003824 catalytic activity; GO:0009815 1-aminocyclopropane-1-carboxylate oxidase activity; GO:0016491 oxidoreductase activity; GO:0016638 oxidoreductase activity, acting on the CH-NH2 group of donors; GO:0016641 oxidoreductase activity, acting on the CH-NH2 group of donors, oxygen as acceptor;	K05933	E1.14.17.4; aminocyclopropanecarboxylate oxidase [EC:1.14.17.4]	map00270 Cysteine and methionine metabolism; map01100 Metabolic pathways; map01110 Biosynthesis of secondary metabolites	PF03171	2OG-Fe(II) oxygenase superfamily
TRINITY_DN5502_c0_g1	cytochrome P450 family 71 protein	0.549	Down	0.025919	---	57.876	1.283		1.246	0.668		0.544	1.253		1.458	0.791		0.698	chloroplast	GO:0001101 response to acid chemical; GO:0006629 lipid metabolic process; GO:0006720 isoprenoid metabolic process; GO:0006721 terpenoid metabolic process; GO:0008152 metabolic process; GO:0009058 biosynthetic process; GO:0009719 response to endogenous stimulus; GO:0009725 response to hormone; GO:0009753 response to jasmonic acid; GO:0009987 cellular process; GO:0010033 response to organic substan…	GO:0016020 membrane;	GO:0003824 catalytic activity; GO:0004497 monooxygenase activity; GO:0016491 oxidoreductase activity; GO:0016705 oxidoreductase activity, acting on paired donors, with incorporation or reduction of molecular oxygen; GO:0016709 oxidoreductase activity, acting on paired donors, with incorporation or reduction of molecular oxygen, NAD(P)H as one donor, and incorporation of one atom of oxygen; GO:003…				PF00067	Cytochrome P450
TRINITY_DN1029_c0_g1	4-hydroxy-3-methylbut-2-en-1-yl diphosphate synthase chloroplastic-like	0.618	Down	0.0140825	---	82.061	1.576	1.252	1.55	0.838	1.014	0.692	1.04	0.985	1.046	0.503	0.753	0.641	chloroplast	GO:0001101 response to acid chemical; GO:0002376 immune system process; GO:0006081 cellular aldehyde metabolic process; GO:0006082 organic acid metabolic process; GO:0006090 pyruvate metabolic process; GO:0006629 lipid metabolic process; GO:0006644 phospholipid metabolic process; GO:0006720 isoprenoid metabolic process; GO:0006793 phosphorus metabolic process; GO:0006796 phosphate-containing comp…	GO:0005622 intracellular; GO:0005623 cell; GO:0005737 cytoplasm; GO:0009507 chloroplast; GO:0009526 plastid envelope; GO:0009532 plastid stroma; GO:0009536 plastid; GO:0009570 chloroplast stroma; GO:0009941 chloroplast envelope; GO:0031967 organelle envelope; GO:0031975 envelope; GO:0043226 organelle; GO:0043227 membrane-bounded organelle; GO:0043229 intracellular organelle; GO:0043231 intracellu…	GO:0003824 catalytic activity; GO:0005488 binding; GO:0016491 oxidoreductase activity; GO:0016725 oxidoreductase activity, acting on CH or CH2 groups; GO:0046429 4-hydroxy-3-methylbut-2-en-1-yl diphosphate synthase activity; GO:0048037 cofactor binding; GO:0051536 iron-sulfur cluster binding; GO:0051539 4 iron, 4 sulfur cluster binding; GO:0051540 metal cluster binding; GO:0052592 oxidoreductase …	K03526	gcpE, ispG; (E)-4-hydroxy-3-methylbut-2-enyl-diphosphate synthase [EC:1.17.7.1 1.17.7.3]	map00900 Terpenoid backbone biosynthesis; map01100 Metabolic pathways; map01110 Biosynthesis of secondary metabolites
TRINITY_DN2979_c0_g1	pyruvate decarboxylase 2	0.618	Down	0.0110423	---	31.867	1.065	1.27	1.27	0.863	0.902	0.984	1.327	1.015	1.104	0.734	0.782	0.614	cytoplasm	GO:0001666 response to hypoxia; GO:0006950 response to stress; GO:0009628 response to abiotic stimulus; GO:0034059 response to anoxia; GO:0036293 response to decreased oxygen levels; GO:0050896 response to stimulus; GO:0070482 response to oxygen levels;	GO:0005622 intracellular; GO:0005623 cell; GO:0005737 cytoplasm; GO:0005829 cytosol; GO:0016020 membrane; GO:0044424 intracellular part; GO:0044444 cytoplasmic part; GO:0044464 cell part;	GO:0003824 catalytic activity; GO:0016829 lyase activity; GO:0016830 carbon-carbon lyase activity; GO:0016831 carboxy-lyase activity;	K01568	PDC, pdc; pyruvate decarboxylase [EC:4.1.1.1]	map00010 Glycolysis / Gluconeogenesis; map01100 Metabolic pathways; map01110 Biosynthesis of secondary metabolites	PF02775	Thiamine pyrophosphate enzyme, C-terminal TPP binding domain
TRINITY_DN15803_c0_g1	11S globulin seed storage protein 2	0.351	Down	0.0133401	---	38.919	2.036	1.247	1.563	0.404	0.363	0.561	1.034	1.893	1.157	0.418	0.377	0.637	cytoplasm							PF00190	Cupin
TRINITY_DN6049_c0_g1	adenosylhomocysteinase	0.482	Down	0.0025617	---	53.207	1.93	1.491	1.716	0.698	0.829	0.574	0.872	1.008	1.104	0.449	0.562	0.426	cytoplasm				K01251	E3.3.1.1, ahcY; adenosylhomocysteinase [EC:3.3.1.1]	map00270 Cysteine and methionine metabolism; map01100 Metabolic pathways	PF05221; PF00670	S-adenosyl-L-homocysteine hydrolase; S-adenosyl-L-homocysteine hydrolase, NAD binding domain
TRINITY_DN3095_c0_g1	DEAD-box ATP-dependent RNA helicase 53, mitochondrial-like	0.62	Down	0.00099571	---	62.159	1.347	1.23	1.283	0.741	1.004	0.912	1.048	1.131	1.105	0.738	0.619	0.68	mitochondria	GO:0000373 Group II intron splicing; GO:0000375 RNA splicing, via transesterification reactions; GO:0000377 RNA splicing, via transesterification reactions with bulged adenosine as nucleophile; GO:0001101 response to acid chemical; GO:0006139 nucleobase-containing compound metabolic process; GO:0006396 RNA processing; GO:0006725 cellular aromatic compound metabolic process; GO:0006807 nitrogen co…	GO:0005618 cell wall; GO:0005622 intracellular; GO:0005623 cell; GO:0005634 nucleus; GO:0005730 nucleolus; GO:0005737 cytoplasm; GO:0005739 mitochondrion; GO:0018995 host; GO:0019034 viral replication complex; GO:0030312 external encapsulating structure; GO:0031974 membrane-enclosed lumen; GO:0031981 nuclear lumen; GO:0033643 host cell part; GO:0033646 host intracellular part; GO:0033647 host int…	GO:0003676 nucleic acid binding; GO:0003677 DNA binding; GO:0003723 RNA binding; GO:0003724 RNA helicase activity; GO:0003824 catalytic activity; GO:0004004 ATP-dependent RNA helicase activity; GO:0004386 helicase activity; GO:0005488 binding; GO:0008026 ATP-dependent helicase activity; GO:0008186 RNA-dependent ATPase activity; GO:0016462 pyrophosphatase activity; GO:0016787 hydrolase activity; G…				PF00270	DEAD/DEAH box helicase
TRINITY_DN8098_c0_g1	3-dehydroquinate synthase	0.654	Down	0.0024249	---	47.991	1.397	1.254	1.607	0.888	0.846	0.789	1.053	1.079	0.906	0.663	0.696	0.629	chloroplast		GO:0005622 intracellular; GO:0005623 cell; GO:0005737 cytoplasm; GO:0005768 endosome; GO:0005794 Golgi apparatus; GO:0005802 trans-Golgi network; GO:0009507 chloroplast; GO:0009532 plastid stroma; GO:0009536 plastid; GO:0009570 chloroplast stroma; GO:0012505 endomembrane system; GO:0031410 cytoplasmic vesicle; GO:0031982 vesicle; GO:0031984 organelle subcompartment; GO:0043226 organelle; GO:00432…		K01735	aroB; 3-dehydroquinate synthase [EC:4.2.3.4]	map00400 Phenylalanine, tyrosine and tryptophan biosynthesis; map01100 Metabolic pathways; map01110 Biosynthesis of secondary metabolites; map01230 Biosynthesis of amino acids	PF01761	3-dehydroquinate synthase
TRINITY_DN11883_c0_g1	uridine nucleosidase 1	0.659	Down	0.0044394	---	35.551	1.216	1.266	1.44	0.937	0.954	0.703	1.153	0.99	1.14	0.715	0.791	0.659	cytoplasm	GO:0006139 nucleobase-containing compound metabolic process; GO:0006152 purine nucleoside catabolic process; GO:0006213 pyrimidine nucleoside metabolic process; GO:0006218 uridine catabolic process; GO:0006725 cellular aromatic compound metabolic process; GO:0006807 nitrogen compound metabolic process; GO:0008152 metabolic process; GO:0009056 catabolic process; GO:0009116 nucleoside metabolic pro…	GO:0005622 intracellular; GO:0005623 cell; GO:0005737 cytoplasm; GO:0005829 cytosol; GO:0044424 intracellular part; GO:0044444 cytoplasmic part; GO:0044464 cell part;	GO:0003824 catalytic activity; GO:0008477 purine nucleosidase activity; GO:0016787 hydrolase activity; GO:0016798 hydrolase activity, acting on glycosyl bonds; GO:0016799 hydrolase activity, hydrolyzing N-glycosyl compounds; GO:0045437 uridine nucleosidase activity; GO:0047622 adenosine nucleosidase activity; GO:0047724 inosine nucleosidase activity; GO:0050263 ribosylpyrimidine nucleosidase acti…	K01240	URH1; uridine nucleosidase [EC:3.2.2.3]	map00240 Pyrimidine metabolism; map00760 Nicotinate and nicotinamide metabolism; map01100 Metabolic pathways	PF01156	Inosine-uridine preferring nucleoside hydrolase
TRINITY_DN20630_c0_g1	polygalacturonase inhibitor-like	0.402	Down	0.0143037	---	38.005		1.678	1.59		0.606	0.653		1.147	1.231		0.528	0.428	extracellular	GO:0043086 negative regulation of catalytic activity; GO:0044092 negative regulation of molecular function; GO:0050790 regulation of catalytic activity; GO:0065007 biological regulation; GO:0065009 regulation of molecular function;	GO:0005618 cell wall; GO:0005622 intracellular; GO:0005623 cell; GO:0005737 cytoplasm; GO:0005794 Golgi apparatus; GO:0005911 cell-cell junction; GO:0009505 plant-type cell wall; GO:0009506 plasmodesma; GO:0012505 endomembrane system; GO:0016020 membrane; GO:0030054 cell junction; GO:0030312 external encapsulating structure; GO:0043226 organelle; GO:0043227 membrane-bounded organelle; GO:0043229 …	GO:0004857 enzyme inhibitor activity; GO:0030234 enzyme regulator activity; GO:0090353 polygalacturonase inhibitor activity; GO:0098772 molecular function regulator;
TRINITY_DN8989_c0_g1	hypothetical protein TSUD_10090	0.612	Down	0.0139177	---	39.503	1.671	1.309	1.403	0.691	0.748	0.788	0.994	1.202	0.974	0.634	0.544	0.763	chloroplast	GO:0006950 response to stress; GO:0006970 response to osmotic stress; GO:0009628 response to abiotic stimulus; GO:0009651 response to salt stress; GO:0050896 response to stimulus;	GO:0005622 intracellular; GO:0005623 cell; GO:0005737 cytoplasm; GO:0005768 endosome; GO:0005794 Golgi apparatus; GO:0005802 trans-Golgi network; GO:0012505 endomembrane system; GO:0031410 cytoplasmic vesicle; GO:0031982 vesicle; GO:0031984 organelle subcompartment; GO:0043226 organelle; GO:0043227 membrane-bounded organelle; GO:0043229 intracellular organelle; GO:0043231 intracellular membrane-b…
TRINITY_DN13522_c0_g1	protein DMR6-LIKE OXYGENASE 2 isoform X1	0.293	Down	0.00118435	---	39.151	1.46	1.088	1.355	0.475	0.627	0.409	1.344	1.504	1.831	0.466	0.544	0.361	cytoplasm	GO:0000003 reproduction; GO:0000902 cell morphogenesis; GO:0001101 response to acid chemical; GO:0003006 developmental process involved in reproduction; GO:0006082 organic acid metabolic process; GO:0006629 lipid metabolic process; GO:0006720 isoprenoid metabolic process; GO:0006721 terpenoid metabolic process; GO:0007154 cell communication; GO:0007165 signal transduction; GO:0007275 multicellula…	GO:0005622 intracellular; GO:0005623 cell; GO:0005737 cytoplasm; GO:0044424 intracellular part; GO:0044464 cell part;	GO:0003824 catalytic activity; GO:0016491 oxidoreductase activity; GO:0016705 oxidoreductase activity, acting on paired donors, with incorporation or reduction of molecular oxygen; GO:0016706 oxidoreductase activity, acting on paired donors, with incorporation or reduction of molecular oxygen, 2-oxoglutarate as one donor, and incorporation of one atom each of oxygen into both donors; GO:0045544 g…				PF03171	2OG-Fe(II) oxygenase superfamily
TRINITY_DN16841_c0_g1	PIP2-2	0.659	Down	0.0101595	---	30.579	1.488	1.557	1.355	0.926	0.716	0.86	0.845	0.982	1.119	0.614	0.697	0.631	plasma membrane				K09872	PIP; aquaporin PIP
TRINITY_DN19355_c0_g1	endochitinase A2	0.492	Down	0.02746	---	39.827	1.658	1.719	1.643	0.338	0.525	0.33	1.139	1.032	1.48	0.8	0.579	0.419	extracellular				K20547	CHIB; basic endochitinase B [EC:3.2.1.14]	map00520 Amino sugar and nucleotide sugar metabolism; map01100 Metabolic pathways; map04016 MAPK signaling pathway - plant	PF00187; PF00182	Chitin recognition protein; Chitinase class I
TRINITY_DN707_c0_g1	lipoxygenase LOXN3	0.31	Down	0.005923	---	96.962	2.164	1.713	1.568	0.49	0.609	0.452	0.8	1.232	1.401	0.39	0.266	0.409	cytoplasm				K15718	LOX1_5; linoleate 9S-lipoxygenase [EC:1.13.11.58]	map00591 Linoleic acid metabolism	PF01477; PF00305	PLAT/LH2 domain; Lipoxygenase
TRINITY_DN868_c0_g1	YTH domain-containing protein ECT4 isoform X1	0.514	Down	0.016744	---	74.105	1.59	1.271	1.267	0.658	0.997	0.703	1.194	1.059	1.268	0.423	0.664	0.722	nucleus				K20102	YTHDF; YTH domain-containing family protein		PF04146	YT521-B-like domain
TRINITY_DN8077_c0_g1	alanine--glyoxylate aminotransferase 2 homolog 3, mitochondrial	0.611	Down	0.0054025	---	56.664	1.888	1.72	1.684	0.492	0.67	0.558	0.877	0.982	1.131	0.669	0.563	0.594	mitochondria	GO:0007154 cell communication; GO:0009605 response to external stimulus; GO:0009987 cellular process; GO:0009991 response to extracellular stimulus; GO:0031667 response to nutrient levels; GO:0031668 cellular response to extracellular stimulus; GO:0031669 cellular response to nutrient levels; GO:0043562 cellular response to nitrogen levels; GO:0050896 response to stimulus; GO:0051716 cellular res…	GO:0005622 intracellular; GO:0005623 cell; GO:0005737 cytoplasm; GO:0005739 mitochondrion; GO:0043226 organelle; GO:0043227 membrane-bounded organelle; GO:0043229 intracellular organelle; GO:0043231 intracellular membrane-bounded organelle; GO:0044424 intracellular part; GO:0044444 cytoplasmic part; GO:0044464 cell part;	GO:0003824 catalytic activity; GO:0005488 binding; GO:0005515 protein binding; GO:0008144 drug binding; GO:0008453 alanine-glyoxylate transaminase activity; GO:0008483 transaminase activity; GO:0016740 transferase activity; GO:0016769 transferase activity, transferring nitrogenous groups; GO:0019842 vitamin binding; GO:0030170 pyridoxal phosphate binding; GO:0036094 small molecule binding; GO:004…	K00827	AGXT2; alanine-glyoxylate transaminase / (R)-3-amino-2-methylpropionate-pyruvate transaminase [EC:2.6.1.44 2.6.1.40]	map00250 Alanine, aspartate and glutamate metabolism; map00260 Glycine, serine and threonine metabolism; map00270 Cysteine and methionine metabolism; map00280 Valine, leucine and isoleucine degradation; map01100 Metabolic pathways; map01110 Biosynthesis of secondary metabolites	PF00202	Aminotransferase class-III
TRINITY_DN4753_c0_g1	protein WVD2-like 5	0.447	Down	0.022737	---	34.542		1.453	1.426		0.726	0.747		1.274	1.161		0.482	0.607	nucleus	GO:0009719 response to endogenous stimulus; GO:0009723 response to ethylene; GO:0009725 response to hormone; GO:0009987 cellular process; GO:0010033 response to organic substance; GO:0032870 cellular response to hormone stimulus; GO:0042221 response to chemical; GO:0050896 response to stimulus; GO:0051716 cellular response to stimulus; GO:0070887 cellular response to chemical stimulus; GO:0071310…		GO:0005488 binding; GO:0005515 protein binding; GO:0008017 microtubule binding; GO:0008092 cytoskeletal protein binding; GO:0015631 tubulin binding;
TRINITY_DN7682_c0_g1	tubulin alpha-4 chain	0.442	Down	0.023075	---	54.125		1.615	1.607		0.729	0.468		1.048	1.321		0.549	0.499	mitochondria		GO:0005622 intracellular; GO:0005623 cell; GO:0005856 cytoskeleton; GO:0043226 organelle; GO:0043228 non-membrane-bounded organelle; GO:0043229 intracellular organelle; GO:0043232 intracellular non-membrane-bounded organelle; GO:0044424 intracellular part; GO:0044464 cell part;		K07374	TUBA; tubulin alpha	map04145 Phagosome	PF00091; PF03953	Tubulin/FtsZ family, GTPase domain; Tubulin C-terminal domain
TRINITY_DN13912_c0_g1	hypothetical protein TSUD_311810	0.503	Down	0.00126212	---	40.022	1.566	1.538	1.561	0.904	0.83	0.703	0.942	1.098	1.134	0.573	0.468	0.555	chloroplast	GO:0003002 regionalization; GO:0006275 regulation of DNA replication; GO:0006629 lipid metabolic process; GO:0006694 steroid biosynthetic process; GO:0007275 multicellular organism development; GO:0007389 pattern specification process; GO:0008152 metabolic process; GO:0008156 negative regulation of DNA replication; GO:0008202 steroid metabolic process; GO:0008610 lipid biosynthetic process; GO:00…	GO:0005622 intracellular; GO:0005623 cell; GO:0005737 cytoplasm; GO:0005783 endoplasmic reticulum; GO:0005794 Golgi apparatus; GO:0012505 endomembrane system; GO:0043226 organelle; GO:0043227 membrane-bounded organelle; GO:0043229 intracellular organelle; GO:0043231 intracellular membrane-bounded organelle; GO:0044424 intracellular part; GO:0044444 cytoplasmic part; GO:0044464 cell part;	GO:0003824 catalytic activity; GO:0003838 sterol 24-C-methyltransferase activity; GO:0008168 methyltransferase activity; GO:0008169 C-methyltransferase activity; GO:0008757 S-adenosylmethionine-dependent methyltransferase activity; GO:0016740 transferase activity; GO:0016741 transferase activity, transferring one-carbon groups;	K08242	E2.1.1.143; 24-methylenesterol C-methyltransferase [EC:2.1.1.143]	map00100 Steroid biosynthesis; map01110 Biosynthesis of secondary metabolites	PF08241	Methyltransferase domain
TRINITY_DN5880_c0_g1	fiddlehead-like protein	0.583	Down	0.00091515	---	60.62	1.566	1.339	1.277	0.768	0.863	0.942	1.073	1.127	1.066	0.565	0.648	0.69	plasma membrane	GO:0006950 response to stress; GO:0009266 response to temperature stimulus; GO:0009314 response to radiation; GO:0009409 response to cold; GO:0009416 response to light stimulus; GO:0009628 response to abiotic stimulus; GO:0050896 response to stimulus; GO:0080167 response to karrikin;	GO:0005622 intracellular; GO:0005623 cell; GO:0005737 cytoplasm; GO:0005783 endoplasmic reticulum; GO:0012505 endomembrane system; GO:0016020 membrane; GO:0043226 organelle; GO:0043227 membrane-bounded organelle; GO:0043229 intracellular organelle; GO:0043231 intracellular membrane-bounded organelle; GO:0044424 intracellular part; GO:0044444 cytoplasmic part; GO:0044464 cell part;		K15397	KCS; 3-ketoacyl-CoA synthase [EC:2.3.1.199]	map00062 Fatty acid elongation; map01100 Metabolic pathways; map01110 Biosynthesis of secondary metabolites; map04626 Plant-pathogen interaction	PF08541	3-Oxoacyl-[acyl-carrier-protein (ACP)] synthase III C terminal
TRINITY_DN53695_c0_g1	transport protein SEC61 subunit beta-like, partial	0.439	Down	0.0036965	---	10.731	1.57	1.455	1.463	0.497	0.51	0.772	1.197	1.494	1.266	0.669	0.452	0.617	chloroplast	GO:0006605 protein targeting; GO:0006612 protein targeting to membrane; GO:0006613 cotranslational protein targeting to membrane; GO:0006614 SRP-dependent cotranslational protein targeting to membrane; GO:0006616 SRP-dependent cotranslational protein targeting to membrane, translocation; GO:0006620 posttranslational protein targeting to membrane; GO:0006810 transport; GO:0006886 intracellular pro…	GO:0005622 intracellular; GO:0005623 cell; GO:0005737 cytoplasm; GO:0005783 endoplasmic reticulum; GO:0005789 endoplasmic reticulum membrane; GO:0005791 rough endoplasmic reticulum; GO:0012505 endomembrane system; GO:0016020 membrane; GO:0030867 rough endoplasmic reticulum membrane; GO:0031090 organelle membrane; GO:0031205 endoplasmic reticulum Sec complex; GO:0031984 organelle subcompartment; G…	GO:0005085 guanyl-nucleotide exchange factor activity; GO:0005086 ARF guanyl-nucleotide exchange factor activity; GO:0005488 binding; GO:0005515 protein binding; GO:0019899 enzyme binding; GO:0051020 GTPase binding; GO:0098772 molecular function regulator;	K09481	SEC61B, SBH2; protein transport protein SEC61 subunit beta	map03060 Protein export; map04141 Protein processing in endoplasmic reticulum; map04145 Phagosome
TRINITY_DN2758_c0_g1	pyruvate kinase isozyme A, chloroplastic	0.622	Down	0.0027162	---	21.432	1.43	1.271		0.948	1.121		1.015	0.979		0.61	0.631		chloroplast	GO:0000003 reproduction; GO:0003006 developmental process involved in reproduction; GO:0005975 carbohydrate metabolic process; GO:0006082 organic acid metabolic process; GO:0006090 pyruvate metabolic process; GO:0006091 generation of precursor metabolites and energy; GO:0006096 glycolytic process; GO:0006139 nucleobase-containing compound metabolic process; GO:0006163 purine nucleotide metabolic …	GO:0005622 intracellular; GO:0005623 cell; GO:0005737 cytoplasm; GO:0009507 chloroplast; GO:0009532 plastid stroma; GO:0009536 plastid; GO:0009570 chloroplast stroma; GO:0043226 organelle; GO:0043227 membrane-bounded organelle; GO:0043229 intracellular organelle; GO:0043231 intracellular membrane-bounded organelle; GO:0044422 organelle part; GO:0044424 intracellular part; GO:0044434 chloroplast p…	GO:0000287 magnesium ion binding; GO:0003824 catalytic activity; GO:0004743 pyruvate kinase activity; GO:0005488 binding; GO:0016740 transferase activity; GO:0016772 transferase activity, transferring phosphorus-containing groups; GO:0016773 phosphotransferase activity, alcohol group as acceptor; GO:0030955 potassium ion binding; GO:0031420 alkali metal ion binding; GO:0043167 ion binding; GO:004…	K00873	PK, pyk; pyruvate kinase [EC:2.7.1.40]	map00010 Glycolysis / Gluconeogenesis; map00230 Purine metabolism; map00620 Pyruvate metabolism; map01100 Metabolic pathways; map01110 Biosynthesis of secondary metabolites; map01200 Carbon metabolism; map01230 Biosynthesis of amino acids
TRINITY_DN2674_c0_g1	hypothetical protein TSUD_401230	0.66	Down	0.0166193	---	67.821		1.083	1.388		0.942	0.729		1.155	1.123		0.791	0.712	chloroplast	GO:0006139 nucleobase-containing compound metabolic process; GO:0006725 cellular aromatic compound metabolic process; GO:0006807 nitrogen compound metabolic process; GO:0008152 metabolic process; GO:0009451 RNA modification; GO:0009987 cellular process; GO:0016070 RNA metabolic process; GO:0034641 cellular nitrogen compound metabolic process; GO:0043170 macromolecule metabolic process; GO:0043412…	GO:0005622 intracellular; GO:0005623 cell; GO:0005737 cytoplasm; GO:0005739 mitochondrion; GO:0043226 organelle; GO:0043227 membrane-bounded organelle; GO:0043229 intracellular organelle; GO:0043231 intracellular membrane-bounded organelle; GO:0044424 intracellular part; GO:0044444 cytoplasmic part; GO:0044464 cell part;	GO:0003676 nucleic acid binding; GO:0003723 RNA binding; GO:0003824 catalytic activity; GO:0004518 nuclease activity; GO:0004519 endonuclease activity; GO:0005488 binding; GO:0016787 hydrolase activity; GO:0016788 hydrolase activity, acting on ester bonds; GO:0097159 organic cyclic compound binding; GO:1901363 heterocyclic compound binding;
TRINITY_DN17388_c0_g1	uncharacterized protein LOC25479953	0.423	Down	0.0006573	---	39.853	1.61	1.22	1.527	0.663	0.748	0.668	1.127	1.372	1.197	0.579	0.458	0.527	vacuolar membrane							PF04862	Protein of unknown function, DUF642
TRINITY_DN466_c0_g1	dynamin-2A isoform X2	0.611	Down	0.039296	---	83.017		1.458	1.506		0.87	0.804		0.971	1.06		0.677	0.564	nucleus	GO:0000266 mitochondrial fission; GO:0000902 cell morphogenesis; GO:0000904 cell morphogenesis involved in differentiation; GO:0001101 response to acid chemical; GO:0006810 transport; GO:0006892 post-Golgi vesicle-mediated transport; GO:0006896 Golgi to vacuole transport; GO:0006897 endocytosis; GO:0006898 receptor-mediated endocytosis; GO:0006996 organelle organization; GO:0007005 mitochondrion …	GO:0005622 intracellular; GO:0005623 cell; GO:0005737 cytoplasm; GO:0005773 vacuole; GO:0005774 vacuolar membrane; GO:0005794 Golgi apparatus; GO:0005829 cytosol; GO:0005886 plasma membrane; GO:0005911 cell-cell junction; GO:0009504 cell plate; GO:0009506 plasmodesma; GO:0012505 endomembrane system; GO:0016020 membrane; GO:0030054 cell junction; GO:0030135 coated vesicle; GO:0030136 clathrin-coat…	GO:0003824 catalytic activity; GO:0003924 GTPase activity; GO:0005488 binding; GO:0005515 protein binding; GO:0008017 microtubule binding; GO:0008092 cytoskeletal protein binding; GO:0015631 tubulin binding; GO:0016462 pyrophosphatase activity; GO:0016787 hydrolase activity; GO:0016817 hydrolase activity, acting on acid anhydrides; GO:0016818 hydrolase activity, acting on acid anhydrides, in phos…	K01528	DNM1_3; dynamin 1/3 [EC:3.6.5.5]	map04144 Endocytosis	PF00169	PH domain
TRINITY_DN45447_c0_g1	hypothetical protein TSUD_182740	0.656	Down	0.037401	---	13.995		1.292	1.152		0.571	0.743		1.319	1.206		0.769	0.887	nucleus
TRINITY_DN3338_c0_g1	PsAPY2	0.664	Down	0.0032565	---	50.957	1.342	1.377	1.495	0.984	0.838	0.881	1.019	1.074	0.888	0.67	0.621	0.689	cytoplasm		GO:0005622 intracellular; GO:0005623 cell; GO:0005634 nucleus; GO:0043226 organelle; GO:0043227 membrane-bounded organelle; GO:0043229 intracellular organelle; GO:0043231 intracellular membrane-bounded organelle; GO:0044424 intracellular part; GO:0044464 cell part;		K14641	APY1_2; apyrase [EC:3.6.1.5]	map00230 Purine metabolism; map00240 Pyrimidine metabolism; map01100 Metabolic pathways
TRINITY_DN871_c0_g1	minichromosome maintenance 4 protein	0.561	Down	0.00099826	---	92.714	1.6	1.353	1.409	0.781	1.061	0.725	1.013	1.01	1.197	0.636	0.562	0.609	nucleus	GO:0006139 nucleobase-containing compound metabolic process; GO:0006259 DNA metabolic process; GO:0006260 DNA replication; GO:0006261 DNA-dependent DNA replication; GO:0006268 DNA unwinding involved in DNA replication; GO:0006275 regulation of DNA replication; GO:0006725 cellular aromatic compound metabolic process; GO:0006807 nitrogen compound metabolic process; GO:0006996 organelle organization…	GO:0000347 THO complex; GO:0000785 chromatin; GO:0005622 intracellular; GO:0005623 cell; GO:0005634 nucleus; GO:0005694 chromosome; GO:0005737 cytoplasm; GO:0005829 cytosol; GO:0032991 macromolecular complex; GO:0042555 MCM complex; GO:0043226 organelle; GO:0043227 membrane-bounded organelle; GO:0043228 non-membrane-bounded organelle; GO:0043229 intracellular organelle; GO:0043231 intracellular m…	GO:0003682 chromatin binding; GO:0005488 binding;	K02212	MCM4, CDC54; DNA replication licensing factor MCM4 [EC:3.6.4.12]	map03030 DNA replication	PF00493	MCM2/3/5 family
TRINITY_DN10206_c0_g1	S-adenosylmethionine synthase 2	0.331	Down	0.0069834	---	23.207	1.682	1.824	1.864	0.654	0.585	0.468	1.07	1.224	1.179	0.546	0.253	0.349	cytoplasm		GO:0005622 intracellular; GO:0005623 cell; GO:0005737 cytoplasm; GO:0005829 cytosol; GO:0044424 intracellular part; GO:0044444 cytoplasmic part; GO:0044464 cell part;	GO:0003824 catalytic activity; GO:0004478 methionine adenosyltransferase activity; GO:0016740 transferase activity; GO:0016765 transferase activity, transferring alkyl or aryl (other than methyl) groups;	K00789	metK; S-adenosylmethionine synthetase [EC:2.5.1.6]	map00270 Cysteine and methionine metabolism; map01100 Metabolic pathways; map01110 Biosynthesis of secondary metabolites; map01230 Biosynthesis of amino acids	PF02772; PF02773	S-adenosylmethionine synthetase, central domain; S-adenosylmethionine synthetase, C-terminal domain
TRINITY_DN13237_c0_g1	beta-cyanoalanine synthase	0.538	Down	0.0090796	---	41.537	1.529	1.376	1.415	0.791	0.793	0.866	1.163	1.238	0.904	0.539	0.537	0.702	chloroplast	GO:0000096 sulfur amino acid metabolic process; GO:0000097 sulfur amino acid biosynthetic process; GO:0002376 immune system process; GO:0006082 organic acid metabolic process; GO:0006520 cellular amino acid metabolic process; GO:0006534 cysteine metabolic process; GO:0006535 cysteine biosynthetic process from serine; GO:0006563 L-serine metabolic process; GO:0006790 sulfur compound metabolic proc…	GO:0005622 intracellular; GO:0005623 cell; GO:0005737 cytoplasm; GO:0005739 mitochondrion; GO:0009507 chloroplast; GO:0009509 chromoplast; GO:0009532 plastid stroma; GO:0009536 plastid; GO:0009570 chloroplast stroma; GO:0043226 organelle; GO:0043227 membrane-bounded organelle; GO:0043229 intracellular organelle; GO:0043231 intracellular membrane-bounded organelle; GO:0044422 organelle part; GO:00…	GO:0003824 catalytic activity; GO:0004124 cysteine synthase activity; GO:0005488 binding; GO:0005507 copper ion binding; GO:0008144 drug binding; GO:0016740 transferase activity; GO:0016765 transferase activity, transferring alkyl or aryl (other than methyl) groups; GO:0016829 lyase activity; GO:0016846 carbon-sulfur lyase activity; GO:0019842 vitamin binding; GO:0030170 pyridoxal phosphate bindi…	K13034	ATCYSC1; L-3-cyanoalanine synthase/ cysteine synthase [EC:2.5.1.47 4.4.1.9]	map00270 Cysteine and methionine metabolism; map00460 Cyanoamino acid metabolism; map00920 Sulfur metabolism; map01100 Metabolic pathways; map01110 Biosynthesis of secondary metabolites; map01200 Carbon metabolism; map01230 Biosynthesis of amino acids
TRINITY_DN33327_c0_g1	putative dUTP diphosphatase	0.377	Down	0.0052238	---	15.838	1.44	1.406	1.416	1.023	0.974	0.864	0.9	1.225	1.264	0.549	0.343	0.386	cytoplasm	GO:0006139 nucleobase-containing compound metabolic process; GO:0006220 pyrimidine nucleotide metabolic process; GO:0006221 pyrimidine nucleotide biosynthetic process; GO:0006226 dUMP biosynthetic process; GO:0006244 pyrimidine nucleotide catabolic process; GO:0006725 cellular aromatic compound metabolic process; GO:0006753 nucleoside phosphate metabolic process; GO:0006793 phosphorus metabolic p…		GO:0000287 magnesium ion binding; GO:0003824 catalytic activity; GO:0004170 dUTP diphosphatase activity; GO:0005488 binding; GO:0016462 pyrophosphatase activity; GO:0016787 hydrolase activity; GO:0016817 hydrolase activity, acting on acid anhydrides; GO:0016818 hydrolase activity, acting on acid anhydrides, in phosphorus-containing anhydrides; GO:0043167 ion binding; GO:0043169 cation binding; GO…	K01520	dut, DUT; dUTP pyrophosphatase [EC:3.6.1.23]	map00240 Pyrimidine metabolism; map01100 Metabolic pathways	PF00692	dUTPase
TRINITY_DN727_c0_g1	sucrose synthase isoform 3	0.501	Down	0.028923	---	91.922	1.581	1.704	1.75	0.905	0.752	0.696	1.036	1.011	1.061	0.649	0.475	0.434	mitochondria	GO:0000003 reproduction; GO:0001101 response to acid chemical; GO:0001666 response to hypoxia; GO:0003006 developmental process involved in reproduction; GO:0006950 response to stress; GO:0006970 response to osmotic stress; GO:0007275 multicellular organism development; GO:0009266 response to temperature stimulus; GO:0009409 response to cold; GO:0009413 response to flooding; GO:0009414 response t…	GO:0005622 intracellular; GO:0005623 cell; GO:0005737 cytoplasm; GO:0005773 vacuole; GO:0005829 cytosol; GO:0005886 plasma membrane; GO:0005911 cell-cell junction; GO:0009506 plasmodesma; GO:0016020 membrane; GO:0030054 cell junction; GO:0043226 organelle; GO:0043227 membrane-bounded organelle; GO:0043229 intracellular organelle; GO:0043231 intracellular membrane-bounded organelle; GO:0044424 int…	GO:0003824 catalytic activity; GO:0008194 UDP-glycosyltransferase activity; GO:0016157 sucrose synthase activity; GO:0016740 transferase activity; GO:0016757 transferase activity, transferring glycosyl groups; GO:0016758 transferase activity, transferring hexosyl groups; GO:0035251 UDP-glucosyltransferase activity; GO:0046527 glucosyltransferase activity;	K00695	E2.4.1.13; sucrose synthase [EC:2.4.1.13]	map00500 Starch and sucrose metabolism; map01100 Metabolic pathways
TRINITY_DN40893_c0_g1	cysteine proteinase inhibitor 2-like protein	0.478	Down	0.00029625	---	14.655	1.241	1.246	1.271	0.871	0.932	0.722	1.229	1.184	1.322	0.66	0.555	0.572	vacuolar membrane	GO:0009892 negative regulation of metabolic process; GO:0010466 negative regulation of peptidase activity; GO:0010605 negative regulation of macromolecule metabolic process; GO:0010951 negative regulation of endopeptidase activity; GO:0019222 regulation of metabolic process; GO:0030162 regulation of proteolysis; GO:0031323 regulation of cellular metabolic process; GO:0031324 negative regulation o…		GO:0002020 protease binding; GO:0004857 enzyme inhibitor activity; GO:0004866 endopeptidase inhibitor activity; GO:0004869 cysteine-type endopeptidase inhibitor activity; GO:0005488 binding; GO:0005515 protein binding; GO:0019899 enzyme binding; GO:0030234 enzyme regulator activity; GO:0030414 peptidase inhibitor activity; GO:0061134 peptidase regulator activity; GO:0061135 endopeptidase regulato…	K13899	CST3; cystatin-C
TRINITY_DN5589_c0_g1	RecName: Full=Serine hydroxymethyltransferase, mitochondrial; Short=SHMT; AltName: Full=Glycine hydroxymethyltransferase; AltName: Full=Serine methylase; Flags: Precursor	0.36	Down	0.0079622	---	57.485	1.417	1.382	1.498	0.71	0.763	0.567	1.186	1.401	1.343	0.594	0.299	0.52	mitochondria				K00600	glyA, SHMT; glycine hydroxymethyltransferase [EC:2.1.2.1]	map00260 Glycine, serine and threonine metabolism; map00460 Cyanoamino acid metabolism; map00630 Glyoxylate and dicarboxylate metabolism; map00670 One carbon pool by folate; map01100 Metabolic pathways; map01110 Biosynthesis of secondary metabolites; map01200 Carbon metabolism; map01230 Biosynthesis of amino acids	PF00464	Serine hydroxymethyltransferase
TRINITY_DN27390_c0_g1	RecName: Full=Caffeoyl-CoA O-methyltransferase; AltName: Full=Trans-caffeoyl-CoA 3-O-methyltransferase; Short=CCoAMT; Short=CCoAOMT	0.302	Down	0.00090123	---	27.958	1.968	1.648	1.838	0.624	0.446	0.491	0.976	1.462	1.137	0.355	0.323	0.403	cytoplasm	GO:0006725 cellular aromatic compound metabolic process; GO:0008152 metabolic process; GO:0009058 biosynthetic process; GO:0009698 phenylpropanoid metabolic process; GO:0009699 phenylpropanoid biosynthetic process; GO:0009804 coumarin metabolic process; GO:0009805 coumarin biosynthetic process; GO:0009987 cellular process; GO:0010035 response to inorganic substance; GO:0010038 response to metal i…		GO:0003824 catalytic activity; GO:0008168 methyltransferase activity; GO:0008171 O-methyltransferase activity; GO:0008757 S-adenosylmethionine-dependent methyltransferase activity; GO:0016740 transferase activity; GO:0016741 transferase activity, transferring one-carbon groups; GO:0042409 caffeoyl-CoA O-methyltransferase activity;	K00588	E2.1.1.104; caffeoyl-CoA O-methyltransferase [EC:2.1.1.104]	map00940 Phenylpropanoid biosynthesis; map00941 Flavonoid biosynthesis; map00945 Stilbenoid, diarylheptanoid and gingerol biosynthesis; map01100 Metabolic pathways; map01110 Biosynthesis of secondary metabolites	PF01596	O-methyltransferase
TRINITY_DN19045_c0_g1	putative tonoplast intrinsic protein	0.575	Down	0.022515	---	25.365	1.777	1.377	1.305	0.743	0.843	0.639	0.926	1.125	1.25	0.491	0.646	0.762	vacuolar membrane	GO:0006810 transport; GO:0006811 ion transport; GO:0006833 water transport; GO:0006855 drug transmembrane transport; GO:0006950 response to stress; GO:0006952 defense response; GO:0009605 response to external stimulus; GO:0009607 response to biotic stimulus; GO:0009617 response to bacterium; GO:0015840 urea transport; GO:0015893 drug transport; GO:0019755 one-carbon compound transport; GO:0030104…	GO:0000322 storage vacuole; GO:0000325 plant-type vacuole; GO:0000326 protein storage vacuole; GO:0005576 extracellular region; GO:0005622 intracellular; GO:0005623 cell; GO:0005737 cytoplasm; GO:0005773 vacuole; GO:0005774 vacuolar membrane; GO:0005783 endoplasmic reticulum; GO:0005794 Golgi apparatus; GO:0005886 plasma membrane; GO:0005887 integral component of plasma membrane; GO:0009507 chlor…	GO:0005215 transporter activity; GO:0005372 water transmembrane transporter activity; GO:0015204 urea transmembrane transporter activity; GO:0015250 water channel activity; GO:0015267 channel activity; GO:0015318 inorganic solute uptake transmembrane transporter activity; GO:0022803 passive transmembrane transporter activity; GO:0022838 substrate-specific channel activity; GO:0022857 transmembran…	K09873	TIP; aquaporin TIP
TRINITY_DN16579_c0_g1	NTH1	0.326	Down	0.0160571	---	40.563	1.708	1.373	1.346	0.614	0.856	0.366	0.973	1.302	1.836	0.655	0.337	0.347	extracellular	GO:0006508 proteolysis; GO:0006807 nitrogen compound metabolic process; GO:0008152 metabolic process; GO:0009056 catabolic process; GO:0009057 macromolecule catabolic process; GO:0009987 cellular process; GO:0019538 protein metabolic process; GO:0030163 protein catabolic process; GO:0043170 macromolecule metabolic process; GO:0044237 cellular metabolic process; GO:0044238 primary metabolic proces…	GO:0000323 lytic vacuole; GO:0005576 extracellular region; GO:0005615 extracellular space; GO:0005622 intracellular; GO:0005623 cell; GO:0005737 cytoplasm; GO:0005764 lysosome; GO:0005773 vacuole; GO:0043226 organelle; GO:0043227 membrane-bounded organelle; GO:0043229 intracellular organelle; GO:0043231 intracellular membrane-bounded organelle; GO:0044421 extracellular region part; GO:0044424 int…	GO:0003824 catalytic activity; GO:0004175 endopeptidase activity; GO:0004197 cysteine-type endopeptidase activity; GO:0008233 peptidase activity; GO:0008234 cysteine-type peptidase activity; GO:0016787 hydrolase activity; GO:0070011 peptidase activity, acting on L-amino acid peptides;				PF08246; PF00112	Cathepsin propeptide inhibitor domain (I29); Papain family cysteine protease
TRINITY_DN7969_c0_g1	RecName: Full=Protochlorophyllide reductase, chloroplastic; Short=PCR; AltName: Full=NADPH-protochlorophyllide oxidoreductase; Short=POR; Flags: Precursor	0.239	Down	0.028285	---	42.913	2.247	1.729		0.368	0.484		1.029	1.332		0.223	0.341		chloroplast	GO:0007275 multicellular organism development; GO:0008152 metabolic process; GO:0009314 response to radiation; GO:0009416 response to light stimulus; GO:0009628 response to abiotic stimulus; GO:0009639 response to red or far red light; GO:0009640 photomorphogenesis; GO:0009642 response to light intensity; GO:0009646 response to absence of light; GO:0009647 skotomorphogenesis; GO:0009719 response …	GO:0005622 intracellular; GO:0005623 cell; GO:0005737 cytoplasm; GO:0009507 chloroplast; GO:0009526 plastid envelope; GO:0009527 plastid outer membrane; GO:0009534 chloroplast thylakoid; GO:0009535 chloroplast thylakoid membrane; GO:0009536 plastid; GO:0009579 thylakoid; GO:0009707 chloroplast outer membrane; GO:0009941 chloroplast envelope; GO:0016020 membrane; GO:0019867 outer membrane; GO:0031…	GO:0003824 catalytic activity; GO:0005488 binding; GO:0005515 protein binding; GO:0016491 oxidoreductase activity; GO:0016627 oxidoreductase activity, acting on the CH-CH group of donors; GO:0016628 oxidoreductase activity, acting on the CH-CH group of donors, NAD or NADP as acceptor; GO:0016630 protochlorophyllide reductase activity; GO:0019904 protein domain specific binding;	K00218	por; protochlorophyllide reductase [EC:1.3.1.33]	map00860 Porphyrin and chlorophyll metabolism; map01100 Metabolic pathways; map01110 Biosynthesis of secondary metabolites	PF00106	short chain dehydrogenase
TRINITY_DN2039_c0_g1	probable methyltransferase PMT14	0.645	Down	0.0062966	---	69.327	1.538		1.423	0.633		0.728	1.072		1.112	0.725		0.683	chloroplast	GO:0008152 metabolic process; GO:0032259 methylation;	GO:0005618 cell wall; GO:0005622 intracellular; GO:0005623 cell; GO:0005737 cytoplasm; GO:0005768 endosome; GO:0005773 vacuole; GO:0005774 vacuolar membrane; GO:0005794 Golgi apparatus; GO:0005802 trans-Golgi network; GO:0009505 plant-type cell wall; GO:0012505 endomembrane system; GO:0016020 membrane; GO:0030312 external encapsulating structure; GO:0031090 organelle membrane; GO:0031410 cytoplas…	GO:0003824 catalytic activity; GO:0008168 methyltransferase activity; GO:0008757 S-adenosylmethionine-dependent methyltransferase activity; GO:0016740 transferase activity; GO:0016741 transferase activity, transferring one-carbon groups;
TRINITY_DN6915_c0_g1	tubulin beta chain	0.594	Down	0.0028753	---	50.697	1.594	1.544	1.539	0.691	0.825	0.615	1.072	1.024	1.1	0.646	0.544	0.71	nucleus	GO:0000902 cell morphogenesis; GO:0006996 organelle organization; GO:0007010 cytoskeleton organization; GO:0007017 microtubule-based process; GO:0009314 response to radiation; GO:0009416 response to light stimulus; GO:0009628 response to abiotic stimulus; GO:0009653 anatomical structure morphogenesis; GO:0009826 unidimensional cell growth; GO:0009987 cellular process; GO:0016043 cellular componen…	GO:0005618 cell wall; GO:0005622 intracellular; GO:0005623 cell; GO:0005737 cytoplasm; GO:0005773 vacuole; GO:0005774 vacuolar membrane; GO:0005856 cytoskeleton; GO:0005886 plasma membrane; GO:0009507 chloroplast; GO:0009532 plastid stroma; GO:0009536 plastid; GO:0009570 chloroplast stroma; GO:0016020 membrane; GO:0030312 external encapsulating structure; GO:0031090 organelle membrane; GO:0032991…	GO:0005198 structural molecule activity; GO:0005200 structural constituent of cytoskeleton;	K07375	TUBB; tubulin beta	map04145 Phagosome	PF00091; PF03953	Tubulin/FtsZ family, GTPase domain; Tubulin C-terminal domain
TRINITY_DN2118_c0_g1	rhamnose biosynthetic-like enzyme	0.559	Down	0.00173936	---	75.492	1.594	1.414	1.539	0.696	0.75	0.632	1.076	1.151	1.057	0.549	0.583	0.703	chloroplast	GO:0006139 nucleobase-containing compound metabolic process; GO:0006725 cellular aromatic compound metabolic process; GO:0006793 phosphorus metabolic process; GO:0006807 nitrogen compound metabolic process; GO:0006810 transport; GO:0008152 metabolic process; GO:0009058 biosynthetic process; GO:0009225 nucleotide-sugar metabolic process; GO:0009226 nucleotide-sugar biosynthetic process; GO:0009812…	GO:0005622 intracellular; GO:0005623 cell; GO:0005737 cytoplasm; GO:0005829 cytosol; GO:0005911 cell-cell junction; GO:0009506 plasmodesma; GO:0030054 cell junction; GO:0044424 intracellular part; GO:0044444 cytoplasmic part; GO:0044464 cell part; GO:0055044 symplast;	GO:0003824 catalytic activity; GO:0010280 UDP-L-rhamnose synthase activity; GO:0016829 lyase activity; GO:0016835 carbon-oxygen lyase activity; GO:0016836 hydro-lyase activity; GO:0050377 UDP-glucose 4,6-dehydratase activity;	K12450	RHM; UDP-glucose 4,6-dehydratase [EC:4.2.1.76]	map00520 Amino sugar and nucleotide sugar metabolism; map01100 Metabolic pathways	PF04321	RmlD substrate binding domain
TRINITY_DN4148_c0_g1	3-phosphoshikimate 1-carboxyvinyltransferase 2	0.614	Down	0.0056973	---	41.708	1.423	1.48	1.387	0.736	0.806	0.67	0.925	1.108	1.18	0.722	0.603	0.649	cytoplasm	GO:0006082 organic acid metabolic process; GO:0008152 metabolic process; GO:0009058 biosynthetic process; GO:0009423 chorismate biosynthetic process; GO:0009987 cellular process; GO:0016053 organic acid biosynthetic process; GO:0019752 carboxylic acid metabolic process; GO:0043436 oxoacid metabolic process; GO:0043648 dicarboxylic acid metabolic process; GO:0043650 dicarboxylic acid biosynthetic …	GO:0005622 intracellular; GO:0005623 cell; GO:0005737 cytoplasm; GO:0009507 chloroplast; GO:0009532 plastid stroma; GO:0009536 plastid; GO:0009570 chloroplast stroma; GO:0043226 organelle; GO:0043227 membrane-bounded organelle; GO:0043229 intracellular organelle; GO:0043231 intracellular membrane-bounded organelle; GO:0044422 organelle part; GO:0044424 intracellular part; GO:0044434 chloroplast p…	GO:0003824 catalytic activity; GO:0003866 3-phosphoshikimate 1-carboxyvinyltransferase activity; GO:0016740 transferase activity; GO:0016765 transferase activity, transferring alkyl or aryl (other than methyl) groups;	K00800	aroA; 3-phosphoshikimate 1-carboxyvinyltransferase [EC:2.5.1.19]	map00400 Phenylalanine, tyrosine and tryptophan biosynthesis; map01100 Metabolic pathways; map01110 Biosynthesis of secondary metabolites; map01230 Biosynthesis of amino acids
TRINITY_DN47830_c0_g1	60S ribosomal protein L37-3	0.548	Down	0.0020439	---	10.707	1.4	1.193	1.225	0.828	0.702	0.687	1.147	1.258	1.395	0.65	0.784	0.649	chloroplast				K02922	RP-L37e, RPL37; large subunit ribosomal protein L37e	map03010 Ribosome
TRINITY_DN2778_c0_g1	diamine oxidase	0.594	Down	0.030318	---	63.539	1.682	1.561	1.447	0.643	0.616	0.77	0.865	1.237	1.101	0.77	0.509	0.625	cytoskeleton	GO:0008152 metabolic process; GO:0009987 cellular process; GO:0010035 response to inorganic substance; GO:0042221 response to chemical; GO:0050896 response to stimulus; GO:0051716 cellular response to stimulus; GO:0055114 oxidation-reduction process; GO:0070887 cellular response to chemical stimulus; GO:0071241 cellular response to inorganic substance; GO:0097184 response to azide; GO:0097185 cel…		GO:0003824 catalytic activity; GO:0016491 oxidoreductase activity; GO:0016638 oxidoreductase activity, acting on the CH-NH2 group of donors; GO:0016641 oxidoreductase activity, acting on the CH-NH2 group of donors, oxygen as acceptor; GO:0052597 diamine oxidase activity;	K00276	AOC3, AOC2, tynA; primary-amine oxidase [EC:1.4.3.21]	map00260 Glycine, serine and threonine metabolism; map00350 Tyrosine metabolism; map00360 Phenylalanine metabolism; map00410 beta-Alanine metabolism; map00950 Isoquinoline alkaloid biosynthesis; map00960 Tropane, piperidine and pyridine alkaloid biosynthesis; map01100 Metabolic pathways; map01110 Biosynthesis of secondary metabolites	PF02728; PF01179	Copper amine oxidase, N3 domain; Copper amine oxidase, enzyme domain
TRINITY_DN820_c0_g1	phospholipase D alpha 1-like protein	0.599	Down	0.0020172	---	91.775	1.544	1.422	1.39	0.801	0.672	0.697	1.01	1.193	1.204	0.74	0.65	0.652	cytoplasm		GO:0005622 intracellular; GO:0005623 cell; GO:0005737 cytoplasm; GO:0005773 vacuole; GO:0005783 endoplasmic reticulum; GO:0005886 plasma membrane; GO:0009536 plastid; GO:0012505 endomembrane system; GO:0016020 membrane; GO:0043226 organelle; GO:0043227 membrane-bounded organelle; GO:0043229 intracellular organelle; GO:0043231 intracellular membrane-bounded organelle; GO:0044424 intracellular part…		K01115	PLD1_2; phospholipase D1/2 [EC:3.1.4.4]	map00564 Glycerophospholipid metabolism; map00565 Ether lipid metabolism; map01100 Metabolic pathways; map01110 Biosynthesis of secondary metabolites; map04144 Endocytosis	PF00168	C2 domain
TRINITY_DN2735_c0_g1	isoflavonoid glucosyltransferase	0.535	Down	0.0184561	---	53.631		1.155	1.397		0.939	0.632		1.185	1.292		0.712	0.613	chloroplast
TRINITY_DN26159_c0_g1	PRA1 family protein b4-like	0.665	Down	0.0041802	---	23.671	1.221	1.269	1.225	1.06	0.997	0.873	0.99	1.086	1.142	0.764	0.637	0.738	chloroplast	GO:0006810 transport; GO:0016192 vesicle-mediated transport; GO:0051179 localization; GO:0051234 establishment of localization;	GO:0005622 intracellular; GO:0005623 cell; GO:0005737 cytoplasm; GO:0005768 endosome; GO:0005783 endoplasmic reticulum; GO:0005794 Golgi apparatus; GO:0005802 trans-Golgi network; GO:0005829 cytosol; GO:0012505 endomembrane system; GO:0031410 cytoplasmic vesicle; GO:0031982 vesicle; GO:0031984 organelle subcompartment; GO:0043226 organelle; GO:0043227 membrane-bounded organelle; GO:0043229 intrac…		K20359	RABAC1, PRAF1; PRA1 family protein 1
TRINITY_DN33125_c0_g1	pathogenesis-related protein 10a	0.316	Down	0.0036233	---	17.823	2.242	1.951	2.147	0.451	0.39	0.321	0.776	1.227	1.08	0.406	0.26	0.307	cytoplasm							PF00407	Pathogenesis-related protein Bet v I family
TRINITY_DN8848_c0_g1	putative ras-GTPase-activating protein SH3-domain binding protein	0.663	Down	0.0079434	---	52.841	1.309	1.337	1.442	0.84	0.86	0.694	1.014	1.116	1.153	0.722	0.822	0.634	chloroplast							PF02136; PF00076	Nuclear transport factor 2 (NTF2) domain; RNA recognition motif. (a.k.a. RRM, RBD, or RNP domain)
TRINITY_DN20875_c0_g1	1-aminocyclopropane-1-carboxylate oxidase 1-like protein	0.501	Down	0.028816	---	34.273	1.255	1.429	1.582	0.902	0.802	1.016	1.307	1.197	0.706	0.582	0.52	0.507	cytoplasm	GO:0000302 response to reactive oxygen species; GO:0001101 response to acid chemical; GO:0006950 response to stress; GO:0006979 response to oxidative stress; GO:0007154 cell communication; GO:0009267 cellular response to starvation; GO:0009605 response to external stimulus; GO:0009987 cellular process; GO:0009991 response to extracellular stimulus; GO:0010033 response to organic substance; GO:001…			K05933	E1.14.17.4; aminocyclopropanecarboxylate oxidase [EC:1.14.17.4]	map00270 Cysteine and methionine metabolism; map01100 Metabolic pathways; map01110 Biosynthesis of secondary metabolites	PF03171	2OG-Fe(II) oxygenase superfamily
TRINITY_DN1185_c0_g1	subtilisin-like protease-like protein	0.586	Down	0.0054206	---	79.358	1.466	1.443	1.43	0.776	0.883	0.786	0.943	1.13	1.088	0.708	0.534	0.61	extracellular	GO:0000003 reproduction; GO:0003006 developmental process involved in reproduction; GO:0006508 proteolysis; GO:0006807 nitrogen compound metabolic process; GO:0007275 multicellular organism development; GO:0008152 metabolic process; GO:0009791 post-embryonic development; GO:0009845 seed germination; GO:0009987 cellular process; GO:0010154 fruit development; GO:0010191 mucilage metabolic process; …	GO:0005576 extracellular region; GO:0005618 cell wall; GO:0005623 cell; GO:0009505 plant-type cell wall; GO:0030312 external encapsulating structure; GO:0044464 cell part; GO:0048046 apoplast; GO:0071944 cell periphery;	GO:0003824 catalytic activity; GO:0004175 endopeptidase activity; GO:0004252 serine-type endopeptidase activity; GO:0008233 peptidase activity; GO:0008236 serine-type peptidase activity; GO:0016787 hydrolase activity; GO:0017171 serine hydrolase activity; GO:0070011 peptidase activity, acting on L-amino acid peptides;				PF05922; PF00082	Peptidase inhibitor I9; Subtilase family
TRINITY_DN5551_c0_g1	allene oxide synthase 1, chloroplastic	0.563	Down	0.008524	---	53.979	1.746	1.364	1.481	0.603	0.781	0.597	0.905	1.215	1.212	0.679	0.547	0.651	cytoplasm	GO:0006629 lipid metabolic process; GO:0008152 metabolic process; GO:0008202 steroid metabolic process; GO:0016125 sterol metabolic process; GO:0044238 primary metabolic process; GO:0055114 oxidation-reduction process; GO:0071704 organic substance metabolic process; GO:1901360 organic cyclic compound metabolic process; GO:1901615 organic hydroxy compound metabolic process;		GO:0003824 catalytic activity; GO:0004497 monooxygenase activity; GO:0016491 oxidoreductase activity;	K01723	AOS; hydroperoxide dehydratase [EC:4.2.1.92]	map00592 alpha-Linolenic acid metabolism; map01100 Metabolic pathways; map01110 Biosynthesis of secondary metabolites	PF00067	Cytochrome P450
TRINITY_DN30324_c0_g1	DEAD-box ATP-dependent RNA helicase 56-like isoform X1	0.639	Down	0.0184401	---	34.076		1.307	1.337		0.946	0.757		1.07	1.126		0.662	0.741	cytoplasm	GO:0000003 reproduction; GO:0000375 RNA splicing, via transesterification reactions; GO:0000377 RNA splicing, via transesterification reactions with bulged adenosine as nucleophile; GO:0000398 mRNA splicing, via spliceosome; GO:0003006 developmental process involved in reproduction; GO:0006139 nucleobase-containing compound metabolic process; GO:0006396 RNA processing; GO:0006397 mRNA processing;…	GO:0005622 intracellular; GO:0005623 cell; GO:0005634 nucleus; GO:0005681 spliceosomal complex; GO:0005730 nucleolus; GO:0005737 cytoplasm; GO:0005911 cell-cell junction; GO:0009506 plasmodesma; GO:0030054 cell junction; GO:0031974 membrane-enclosed lumen; GO:0031981 nuclear lumen; GO:0032991 macromolecular complex; GO:0043226 organelle; GO:0043227 membrane-bounded organelle; GO:0043228 non-membr…	GO:0003676 nucleic acid binding; GO:0003677 DNA binding; GO:0003690 double-stranded DNA binding; GO:0003697 single-stranded DNA binding; GO:0003723 RNA binding; GO:0003724 RNA helicase activity; GO:0003725 double-stranded RNA binding; GO:0003824 catalytic activity; GO:0004004 ATP-dependent RNA helicase activity; GO:0004386 helicase activity; GO:0005488 binding; GO:0008026 ATP-dependent helicase a…	K12812	DDX39B, UAP56, SUB2; ATP-dependent RNA helicase UAP56/SUB2 [EC:3.6.4.13]	map03013 RNA transport; map03015 mRNA surveillance pathway; map03040 Spliceosome	PF00270	DEAD/DEAH box helicase
TRINITY_DN9924_c0_g1	tubulin alpha-2 chain	0.545	Down	0.046845	---	49.499	1.473	1.491	1.412	1.031	0.936	0.769	0.807	1.143	1.15	0.699	0.378	0.613	cytoplasm				K07374	TUBA; tubulin alpha	map04145 Phagosome	PF00091; PF03953	Tubulin/FtsZ family, GTPase domain; Tubulin C-terminal domain
TRINITY_DN7876_c0_g1	anthocyanin 3'-O-beta-glucosyltransferase	0.526	Down	0.010123	---	46.002	1.453	1.112	1.344	0.776	1.122	0.672	1.023	1.127	1.279	0.604	0.6	0.6	cytoplasm		GO:0005622 intracellular; GO:0005623 cell; GO:0043226 organelle; GO:0043227 membrane-bounded organelle; GO:0043229 intracellular organelle; GO:0043231 intracellular membrane-bounded organelle; GO:0044424 intracellular part; GO:0044464 cell part;	GO:0003824 catalytic activity; GO:0008194 UDP-glycosyltransferase activity; GO:0016740 transferase activity; GO:0016757 transferase activity, transferring glycosyl groups; GO:0016758 transferase activity, transferring hexosyl groups; GO:0035251 UDP-glucosyltransferase activity; GO:0046527 glucosyltransferase activity; GO:0080043 quercetin 3-O-glucosyltransferase activity; GO:0080044 quercetin 7-O…	K18822	UGT73P2; soyasapogenol B glucuronide galactosyltransferase [EC:2.4.1.272]
TRINITY_DN10834_c0_g1	aspartyl protease AED3-like protein	0.598	Down	0.0057176	---	47.655	1.494	1.734	1.471	1.042	0.881	0.898	0.861	0.922	0.986	0.576	0.462	0.619	vacuolar membrane
TRINITY_DN31773_c0_g1	hypothetical protein TSUD_177440	0.499	Down	0.020678	---	25.8	1.553	1.463	1.804	0.972	0.922	0.867	1.034	1.126	0.688	0.428	0.415	0.577	chloroplast				K00799	GST, gst; glutathione S-transferase [EC:2.5.1.18]	map00480 Glutathione metabolism; map01100 Metabolic pathways	PF02798; PF00043	Glutathione S-transferase, N-terminal domain; Glutathione S-transferase, C-terminal domain
TRINITY_DN12102_c0_g1	peroxidase	0.481	Down	0.0020162	---	35.026	1.937	1.783	2.052	0.597	0.525	0.47	0.851	1.089	1.023	0.5	0.514	0.411	chloroplast	GO:0006950 response to stress; GO:0006970 response to osmotic stress; GO:0009628 response to abiotic stimulus; GO:0009651 response to salt stress; GO:0050896 response to stimulus;	GO:0005622 intracellular; GO:0005623 cell; GO:0005737 cytoplasm; GO:0044424 intracellular part; GO:0044464 cell part;		K00430	E1.11.1.7; peroxidase [EC:1.11.1.7]	map00940 Phenylpropanoid biosynthesis; map01100 Metabolic pathways; map01110 Biosynthesis of secondary metabolites	PF00141	Peroxidase
TRINITY_DN29767_c0_g1	UMP-CMP kinase 3	0.534	Down	0.000101167	---	23.111	1.412	1.338	1.56	1.022	1.056	0.717	1.007	1.015	1.112	0.564	0.578	0.531	cytoplasm	GO:0006139 nucleobase-containing compound metabolic process; GO:0006220 pyrimidine nucleotide metabolic process; GO:0006221 pyrimidine nucleotide biosynthetic process; GO:0006725 cellular aromatic compound metabolic process; GO:0006753 nucleoside phosphate metabolic process; GO:0006793 phosphorus metabolic process; GO:0006796 phosphate-containing compound metabolic process; GO:0006807 nitrogen co…	GO:0005576 extracellular region; GO:0005622 intracellular; GO:0005623 cell; GO:0005737 cytoplasm; GO:0005829 cytosol; GO:0044424 intracellular part; GO:0044444 cytoplasmic part; GO:0044464 cell part; GO:0048046 apoplast;	GO:0000166 nucleotide binding; GO:0003824 catalytic activity; GO:0004127 cytidylate kinase activity; GO:0005488 binding; GO:0005524 ATP binding; GO:0008144 drug binding; GO:0009041 uridylate kinase activity; GO:0016301 kinase activity; GO:0016740 transferase activity; GO:0016772 transferase activity, transferring phosphorus-containing groups; GO:0016776 phosphotransferase activity, phosphate grou…	K13800	CMPK1, UMPK; UMP-CMP kinase [EC:2.7.4.14]	map00240 Pyrimidine metabolism; map01100 Metabolic pathways	PF00406	Adenylate kinase
TRINITY_DN12456_c0_g1	patatin-like protein 1	0.352	Down	0.0079392	---	46.265	2.138	1.743	1.867	0.445	0.446	0.46	0.805	1.412	1.217	0.41	0.484	0.314	extracellular
TRINITY_DN38743_c0_g1	hypothetical protein TSUD_220570	0.601	Down	0.035779	---	17.274	1.546	1.487	1.299	0.858	0.952	0.915	0.88	1.088	1.071	0.704	0.436	0.685	cytoplasm		GO:0016020 membrane;					PF00407	Pathogenesis-related protein Bet v I family
TRINITY_DN31484_c0_g1	coiled-coil-helix-coiled-coil-helix domain-containing protein 10, mitochondrial	0.628	Down	0.0067419	---	17.273	1.178	1.163		0.897	0.859		1.172	1.23		0.777	0.732		chloroplast				K22759	CHCHD10; coiled-coil-helix-coiled-coil-helix domain-containing protein 10		PF06747	CHCH domain
TRINITY_DN1070_c0_g1	RecName: Full=Sucrose synthase; AltName: Full=Sucrose-UDP glucosyltransferase	0.657	Down	0.0042773	---	38.878	1.208	1.508	1.322	0.777	0.768	0.65	1.188	1.023	1.138	0.815	0.673	0.712	cytoplasm,nucleus				K00695	E2.4.1.13; sucrose synthase [EC:2.4.1.13]	map00500 Starch and sucrose metabolism; map01100 Metabolic pathways
TRINITY_DN3920_c0_g1	L-ascorbate oxidase homolog	0.605	Down	0.0056591	---	51.218	1.666	1.37	1.545	0.795	0.856	0.799	0.984	1.07	0.972	0.513	0.697	0.62	chloroplast							PF00394; PF07731	Multicopper oxidase; Multicopper oxidase
TRINITY_DN867_c0_g1	putative DNA (cytosine-5)-methyltransferase CMT1	0.353	Down	0.00170127	---	94.923	2.131	1.78	1.629	0.425	0.855	0.458	0.936	0.991	1.389	0.436	0.354	0.381	nucleus	GO:0009292 genetic transfer; GO:0009294 DNA mediated transformation; GO:0009987 cellular process; GO:0044764 multi-organism cellular process; GO:0051704 multi-organism process;			K00558	DNMT1, dcm; DNA (cytosine-5)-methyltransferase 1 [EC:2.1.1.37]	map00270 Cysteine and methionine metabolism; map01100 Metabolic pathways	PF01426; PF00385; PF00145	BAH domain; Chromo (CHRromatin Organisation MOdifier) domain; C-5 cytosine-specific DNA methylase
TRINITY_DN3979_c0_g1	cystathionine gamma-synthase	0.642	Down	0.03856	---	57.895	1.416	1.052	1.232	0.902	1.018	0.699	0.965	1.115	1.308	0.72	0.733	0.723	chloroplast	GO:0000096 sulfur amino acid metabolic process; GO:0000097 sulfur amino acid biosynthetic process; GO:0001887 selenium compound metabolic process; GO:0006082 organic acid metabolic process; GO:0006520 cellular amino acid metabolic process; GO:0006555 methionine metabolic process; GO:0006790 sulfur compound metabolic process; GO:0006807 nitrogen compound metabolic process; GO:0008152 metabolic pro…	GO:0005622 intracellular; GO:0005623 cell; GO:0005737 cytoplasm; GO:0009507 chloroplast; GO:0009532 plastid stroma; GO:0009536 plastid; GO:0009570 chloroplast stroma; GO:0043226 organelle; GO:0043227 membrane-bounded organelle; GO:0043229 intracellular organelle; GO:0043231 intracellular membrane-bounded organelle; GO:0044422 organelle part; GO:0044424 intracellular part; GO:0044434 chloroplast p…	GO:0003824 catalytic activity; GO:0003962 cystathionine gamma-synthase activity; GO:0005488 binding; GO:0008144 drug binding; GO:0016740 transferase activity; GO:0016765 transferase activity, transferring alkyl or aryl (other than methyl) groups; GO:0019842 vitamin binding; GO:0030170 pyridoxal phosphate binding; GO:0036094 small molecule binding; GO:0043167 ion binding; GO:0043168 anion binding;…	K01739	metB; cystathionine gamma-synthase [EC:2.5.1.48]	map00270 Cysteine and methionine metabolism; map00450 Selenocompound metabolism; map00920 Sulfur metabolism; map01100 Metabolic pathways; map01110 Biosynthesis of secondary metabolites; map01230 Biosynthesis of amino acids	PF01053	Cys/Met metabolism PLP-dependent enzyme
TRINITY_DN1127_c0_g1	putative galactinol-sucrose galactosyltransferase 6-like protein, partial	0.394	Down	0.00010412	---	12.995	1.557	1.431	1.487	0.777	0.793	0.785	1.183	1.285	1.236	0.521	0.434	0.505	chloroplast				K06617	E2.4.1.82; raffinose synthase [EC:2.4.1.82]	map00052 Galactose metabolism; map01100 Metabolic pathways
TRINITY_DN8639_c0_g1	tubulin beta chain, partial	0.631	Down	0.037099	---	52.949	1.807	1.455	1.562	0.978	0.853	0.701	0.769	1.094	0.972	0.488	0.59	0.711	chloroplast	GO:0006950 response to stress; GO:0006970 response to osmotic stress; GO:0006996 organelle organization; GO:0007010 cytoskeleton organization; GO:0007017 microtubule-based process; GO:0009266 response to temperature stimulus; GO:0009409 response to cold; GO:0009628 response to abiotic stimulus; GO:0009651 response to salt stress; GO:0009987 cellular process; GO:0016043 cellular component organiza…	GO:0005622 intracellular; GO:0005623 cell; GO:0005856 cytoskeleton; GO:0005886 plasma membrane; GO:0015630 microtubule cytoskeleton; GO:0016020 membrane; GO:0043226 organelle; GO:0043228 non-membrane-bounded organelle; GO:0043229 intracellular organelle; GO:0043232 intracellular non-membrane-bounded organelle; GO:0044424 intracellular part; GO:0044464 cell part; GO:0071944 cell periphery;	GO:0005198 structural molecule activity; GO:0005200 structural constituent of cytoskeleton;	K07375	TUBB; tubulin beta	map04145 Phagosome	PF00091; PF03953	Tubulin/FtsZ family, GTPase domain; Tubulin C-terminal domain
TRINITY_DN1205_c0_g1	DNA replication licensing factor MCM3	0.488	Down	0.0031844	---	85.681	1.493	1.392		0.742	0.924		1.166	1.113		0.575	0.538		cytoplasm	GO:0006139 nucleobase-containing compound metabolic process; GO:0006259 DNA metabolic process; GO:0006260 DNA replication; GO:0006261 DNA-dependent DNA replication; GO:0006268 DNA unwinding involved in DNA replication; GO:0006725 cellular aromatic compound metabolic process; GO:0006807 nitrogen compound metabolic process; GO:0006996 organelle organization; GO:0008152 metabolic process; GO:0009058…	GO:0000347 THO complex; GO:0005622 intracellular; GO:0005623 cell; GO:0005634 nucleus; GO:0032991 macromolecular complex; GO:0043226 organelle; GO:0043227 membrane-bounded organelle; GO:0043229 intracellular organelle; GO:0043231 intracellular membrane-bounded organelle; GO:0044422 organelle part; GO:0044424 intracellular part; GO:0044428 nuclear part; GO:0044446 intracellular organelle part; GO:…		K02541	MCM3; DNA replication licensing factor MCM3 [EC:3.6.4.12]	map03030 DNA replication	PF00493	MCM2/3/5 family
TRINITY_DN993_c0_g1	ribonucleoside-diphosphate reductase large subunit	0.545	Down	0.0020766	---	75.786	1.685	1.168	1.561	0.529	1.044	0.561	1.137	1.177	1.11	0.59	0.549	0.728	chloroplast	GO:0006139 nucleobase-containing compound metabolic process; GO:0006259 DNA metabolic process; GO:0006260 DNA replication; GO:0006725 cellular aromatic compound metabolic process; GO:0006753 nucleoside phosphate metabolic process; GO:0006793 phosphorus metabolic process; GO:0006796 phosphate-containing compound metabolic process; GO:0006807 nitrogen compound metabolic process; GO:0008152 metaboli…		GO:0003824 catalytic activity; GO:0004748 ribonucleoside-diphosphate reductase activity, thioredoxin disulfide as acceptor; GO:0016491 oxidoreductase activity; GO:0016725 oxidoreductase activity, acting on CH or CH2 groups; GO:0016728 oxidoreductase activity, acting on CH or CH2 groups, disulfide as acceptor; GO:0061731 ribonucleoside-diphosphate reductase activity;	K10807	RRM1; ribonucleoside-diphosphate reductase subunit M1 [EC:1.17.4.1]	map00230 Purine metabolism; map00240 Pyrimidine metabolism; map00480 Glutathione metabolism; map01100 Metabolic pathways	PF03477; PF00317	ATP cone domain; Ribonucleotide reductase, all-alpha domain
TRINITY_DN18251_c0_g1	hypothetical protein TSUD_214340	0.453	Down	0.025176	---	34.973		1.731	1.999		0.496	0.463		1.191	0.926		0.487	0.472	chloroplast				K00430	E1.11.1.7; peroxidase [EC:1.11.1.7]	map00940 Phenylpropanoid biosynthesis; map01100 Metabolic pathways; map01110 Biosynthesis of secondary metabolites	PF00141	Peroxidase
TRINITY_DN13200_c0_g1	pfkB family carbohydrate kinase	0.548	Down	0.0020202	---	35.492	1.146	1.235	1.329	1.105	0.933	0.82	1.121	1.12	1.253	0.669	0.699	0.546	cytoplasm	GO:0005975 carbohydrate metabolic process; GO:0005996 monosaccharide metabolic process; GO:0006000 fructose metabolic process; GO:0006793 phosphorus metabolic process; GO:0006796 phosphate-containing compound metabolic process; GO:0008152 metabolic process; GO:0009987 cellular process; GO:0016310 phosphorylation; GO:0019318 hexose metabolic process; GO:0044237 cellular metabolic process; GO:00442…	GO:0005622 intracellular; GO:0005623 cell; GO:0005737 cytoplasm; GO:0005829 cytosol; GO:0005886 plasma membrane; GO:0005911 cell-cell junction; GO:0009506 plasmodesma; GO:0016020 membrane; GO:0030054 cell junction; GO:0044424 intracellular part; GO:0044444 cytoplasmic part; GO:0044464 cell part; GO:0055044 symplast; GO:0071944 cell periphery;	GO:0003824 catalytic activity; GO:0004396 hexokinase activity; GO:0008865 fructokinase activity; GO:0016301 kinase activity; GO:0016740 transferase activity; GO:0016772 transferase activity, transferring phosphorus-containing groups; GO:0016773 phosphotransferase activity, alcohol group as acceptor; GO:0019200 carbohydrate kinase activity;	K00847	E2.7.1.4, scrK; fructokinase [EC:2.7.1.4]	map00051 Fructose and mannose metabolism; map00500 Starch and sucrose metabolism; map00520 Amino sugar and nucleotide sugar metabolism; map01100 Metabolic pathways
TRINITY_DN8081_c0_g1	putative cytochrome P450	0.649	Down	0.0042769	---	57.354	1.163		1.18	0.874		0.789	1.185		1.237	0.801		0.772	chloroplast				K07409	CYP1A2; cytochrome P450 family 1 subfamily A polypeptide 2 [EC:1.14.14.1]	map00232 Caffeine metabolism; map00380 Tryptophan metabolism; map00591 Linoleic acid metabolism; map01100 Metabolic pathways; map01110 Biosynthesis of secondary metabolites	PF00067	Cytochrome P450
TRINITY_DN12264_c0_g1	putative S-adenosyl-L-methionine:salicylic acid carboxyl methyltransferase	0.597	Down	0.0116403	---	40.127	1.417	1.307	1.555	0.808	0.94	0.767	1.152	1.058	0.922	0.516	0.628	0.726	cytoskeleton				K21483	SAMT; salicylate 1-O-methyltransferase [EC:2.1.1.274]
TRINITY_DN494_c0_g1	putative post-transcriptional gene silencing PAZ-Argonaute family protein	0.66	Down	0.027078	---	101.82	1.054	1.01	1.013	0.868	1.012	1.081	1.419	1.075	1.139	0.686	0.93	0.781	nucleus	GO:0000003 reproduction; GO:0002252 immune effector process; GO:0002376 immune system process; GO:0003006 developmental process involved in reproduction; GO:0006950 response to stress; GO:0006952 defense response; GO:0007049 cell cycle; GO:0007275 multicellular organism development; GO:0009553 embryo sac development; GO:0009554 megasporogenesis; GO:0009605 response to external stimulus; GO:000960…	GO:0005622 intracellular; GO:0005623 cell; GO:0005634 nucleus; GO:0005737 cytoplasm; GO:0043226 organelle; GO:0043227 membrane-bounded organelle; GO:0043229 intracellular organelle; GO:0043231 intracellular membrane-bounded organelle; GO:0044424 intracellular part; GO:0044464 cell part;	GO:0003676 nucleic acid binding; GO:0003723 RNA binding; GO:0005488 binding; GO:0035197 siRNA binding; GO:0097159 organic cyclic compound binding; GO:1901363 heterocyclic compound binding;	K11593	ELF2C, AGO; eukaryotic translation initiation factor 2C		PF08699; PF02170	Domain of unknown function (DUF1785); PAZ domain
TRINITY_DN22230_c0_g1	arginase 1, mitochondrial	0.578	Down	0.0024402	---	36.571	1.241	1.316	1.104	0.784	0.857	0.659	1.191	1.175	1.444	0.747	0.672	0.782	mitochondria	GO:0006082 organic acid metabolic process; GO:0006520 cellular amino acid metabolic process; GO:0006525 arginine metabolic process; GO:0006527 arginine catabolic process; GO:0006560 proline metabolic process; GO:0006570 tyrosine metabolic process; GO:0006576 cellular biogenic amine metabolic process; GO:0006591 ornithine metabolic process; GO:0006595 polyamine metabolic process; GO:0006596 polyam…	GO:0005622 intracellular; GO:0005623 cell; GO:0005737 cytoplasm; GO:0005739 mitochondrion; GO:0009507 chloroplast; GO:0009532 plastid stroma; GO:0009536 plastid; GO:0009570 chloroplast stroma; GO:0043226 organelle; GO:0043227 membrane-bounded organelle; GO:0043229 intracellular organelle; GO:0043231 intracellular membrane-bounded organelle; GO:0044422 organelle part; GO:0044424 intracellular part…	GO:0003824 catalytic activity; GO:0004053 arginase activity; GO:0005488 binding; GO:0008783 agmatinase activity; GO:0016787 hydrolase activity; GO:0016810 hydrolase activity, acting on carbon-nitrogen (but not peptide) bonds; GO:0016813 hydrolase activity, acting on carbon-nitrogen (but not peptide) bonds, in linear amidines; GO:0043167 ion binding; GO:0043169 cation binding; GO:0046872 metal ion…	K01476	E3.5.3.1, rocF, arg; arginase [EC:3.5.3.1]	map00220 Arginine biosynthesis; map00330 Arginine and proline metabolism; map01100 Metabolic pathways; map01110 Biosynthesis of secondary metabolites; map01230 Biosynthesis of amino acids	PF00491	Arginase family
TRINITY_DN1723_c0_g1	probable methyltransferase PMT8	0.606	Down	0.0088377	---	69.915	1.379	1.35	1.349	0.614	0.612	0.703	1.173	1.343	1.14	0.831	0.61	0.774	chloroplast	GO:0008152 metabolic process; GO:0032259 methylation;	GO:0005622 intracellular; GO:0005623 cell; GO:0005634 nucleus; GO:0005737 cytoplasm; GO:0005768 endosome; GO:0005773 vacuole; GO:0005774 vacuolar membrane; GO:0005794 Golgi apparatus; GO:0005802 trans-Golgi network; GO:0005911 cell-cell junction; GO:0009506 plasmodesma; GO:0012505 endomembrane system; GO:0016020 membrane; GO:0030054 cell junction; GO:0031090 organelle membrane; GO:0031410 cytopla…	GO:0003824 catalytic activity; GO:0008168 methyltransferase activity; GO:0008757 S-adenosylmethionine-dependent methyltransferase activity; GO:0016740 transferase activity; GO:0016741 transferase activity, transferring one-carbon groups;
TRINITY_DN13240_c0_g1	putative glutamine synthetase	0.537	Down	2.4812e-05	---	38.917	1.495	1.481	1.517	0.675	0.8	0.681	1.049	1.104	1.079	0.576	0.605	0.554	cytoplasm	GO:0006082 organic acid metabolic process; GO:0006807 nitrogen compound metabolic process; GO:0008152 metabolic process; GO:0009987 cellular process; GO:0042126 nitrate metabolic process; GO:0042128 nitrate assimilation; GO:0043436 oxoacid metabolic process; GO:0044237 cellular metabolic process; GO:0044281 small molecule metabolic process; GO:0071704 organic substance metabolic process; GO:00719…	GO:0005622 intracellular; GO:0005623 cell; GO:0005737 cytoplasm; GO:0005829 cytosol; GO:0044424 intracellular part; GO:0044444 cytoplasmic part; GO:0044464 cell part;	GO:0003824 catalytic activity; GO:0004356 glutamate-ammonia ligase activity; GO:0016211 ammonia ligase activity; GO:0016874 ligase activity; GO:0016879 ligase activity, forming carbon-nitrogen bonds; GO:0016880 acid-ammonia (or amide) ligase activity;	K01915	glnA, GLUL; glutamine synthetase [EC:6.3.1.2]	map00220 Arginine biosynthesis; map00250 Alanine, aspartate and glutamate metabolism; map00630 Glyoxylate and dicarboxylate metabolism; map00910 Nitrogen metabolism; map01100 Metabolic pathways; map01230 Biosynthesis of amino acids	PF03951; PF00120	Glutamine synthetase, beta-Grasp domain; Glutamine synthetase, catalytic domain
TRINITY_DN402_c0_g1	minichromosome maintenance 2 protein	0.466	Down	0.00028189	---	105.56	1.631	1.439	1.6	0.766	1.001	0.672	1.083	0.997	1.164	0.484	0.477	0.551	nucleus	GO:0000003 reproduction; GO:0003006 developmental process involved in reproduction; GO:0006139 nucleobase-containing compound metabolic process; GO:0006259 DNA metabolic process; GO:0006260 DNA replication; GO:0006261 DNA-dependent DNA replication; GO:0006268 DNA unwinding involved in DNA replication; GO:0006275 regulation of DNA replication; GO:0006725 cellular aromatic compound metabolic proces…	GO:0000347 THO complex; GO:0000785 chromatin; GO:0005622 intracellular; GO:0005623 cell; GO:0005634 nucleus; GO:0005694 chromosome; GO:0005737 cytoplasm; GO:0005829 cytosol; GO:0032991 macromolecular complex; GO:0042555 MCM complex; GO:0043226 organelle; GO:0043227 membrane-bounded organelle; GO:0043228 non-membrane-bounded organelle; GO:0043229 intracellular organelle; GO:0043231 intracellular m…		K02540	MCM2; DNA replication licensing factor MCM2 [EC:3.6.4.12]	map03030 DNA replication	PF00493	MCM2/3/5 family
TRINITY_DN7239_c0_g1	protein BTR1	0.536	Down	0.0127752	---	35.98		1.407	1.469		0.831	0.761		1.089	1.144		0.639	0.559	nucleus	GO:0006139 nucleobase-containing compound metabolic process; GO:0006396 RNA processing; GO:0006725 cellular aromatic compound metabolic process; GO:0006807 nitrogen compound metabolic process; GO:0008152 metabolic process; GO:0008380 RNA splicing; GO:0009719 response to endogenous stimulus; GO:0009725 response to hormone; GO:0009735 response to cytokinin; GO:0009987 cellular process; GO:0010033 r…		GO:0003676 nucleic acid binding; GO:0003723 RNA binding; GO:0003729 mRNA binding; GO:0005488 binding; GO:0097159 organic cyclic compound binding; GO:1901363 heterocyclic compound binding;	K14944	NOVA; RNA-binding protein Nova		PF00013	KH domain
TRINITY_DN9248_c0_g1	putative serine carboxypeptidase, partial	0.399	Down	0.0043002	---	56.576	1.147	1.449	1.027	1.174	0.729	0.754	1.257	1.296	1.548	0.462	0.458	0.715	vacuolar membrane	GO:0006508 proteolysis; GO:0006807 nitrogen compound metabolic process; GO:0008152 metabolic process; GO:0009056 catabolic process; GO:0009057 macromolecule catabolic process; GO:0009987 cellular process; GO:0019538 protein metabolic process; GO:0030163 protein catabolic process; GO:0043170 macromolecule metabolic process; GO:0044237 cellular metabolic process; GO:0044238 primary metabolic proces…		GO:0003824 catalytic activity; GO:0004180 carboxypeptidase activity; GO:0004185 serine-type carboxypeptidase activity; GO:0008233 peptidase activity; GO:0008236 serine-type peptidase activity; GO:0008238 exopeptidase activity; GO:0016787 hydrolase activity; GO:0017171 serine hydrolase activity; GO:0070008 serine-type exopeptidase activity; GO:0070011 peptidase activity, acting on L-amino acid pep…	K16297	SCPL-II; serine carboxypeptidase-like clade II [EC:3.4.16.-]		PF00450	Serine carboxypeptidase
TRINITY_DN2811_c0_g1	hypothetical protein TSUD_297340	0.626	Down	0.0142971	---	67.928	1.534	1.428	1.347	0.715	0.798	0.814	0.955	1.117	1.12	0.775	0.546	0.677	plasma membrane	GO:0002790 peptide secretion; GO:0006810 transport; GO:0006897 endocytosis; GO:0006909 phagocytosis; GO:0007154 cell communication; GO:0007155 cell adhesion; GO:0007165 signal transduction; GO:0008104 protein localization; GO:0008283 cell proliferation; GO:0009306 protein secretion; GO:0009987 cellular process; GO:0015031 protein transport; GO:0015833 peptide transport; GO:0016192 vesicle-mediate…	GO:0005623 cell; GO:0005886 plasma membrane; GO:0005887 integral component of plasma membrane; GO:0016020 membrane; GO:0016021 integral component of membrane; GO:0031224 intrinsic component of membrane; GO:0031226 intrinsic component of plasma membrane; GO:0044425 membrane part; GO:0044459 plasma membrane part; GO:0044464 cell part; GO:0071944 cell periphery;	GO:0004888 transmembrane signaling receptor activity; GO:0038023 signaling receptor activity; GO:0060089 molecular transducer activity;	K17085	TM9SF1; transmembrane 9 superfamily member 1
TRINITY_DN9209_c0_g1	alcohol acyltransferase	0.532	Down	0.00029766	---	51.399		1.695	1.584		0.721	0.825		0.989	0.995		0.533	0.522	cytoplasm	GO:0000902 cell morphogenesis; GO:0000904 cell morphogenesis involved in differentiation; GO:0008152 metabolic process; GO:0009058 biosynthetic process; GO:0009059 macromolecule biosynthetic process; GO:0009653 anatomical structure morphogenesis; GO:0009888 tissue development; GO:0009987 cellular process; GO:0010026 trichome differentiation; GO:0010090 trichome morphogenesis; GO:0010143 cutin bio…	GO:0005622 intracellular; GO:0005623 cell; GO:0005737 cytoplasm; GO:0044424 intracellular part; GO:0044464 cell part;		K19747	DCR; BAHD acyltransferase [EC:2.3.1.-]
TRINITY_DN7996_c0_g1	hypothetical protein TSUD_234460	0.548	Down	0.0136414	---	49.751	1.534	1.441	1.337	0.836	0.777	0.851	1.085	1.122	1.108	0.525	0.628	0.664	cytoplasm	GO:0001101 response to acid chemical; GO:0002239 response to oomycetes; GO:0006950 response to stress; GO:0006970 response to osmotic stress; GO:0007623 circadian rhythm; GO:0009266 response to temperature stimulus; GO:0009314 response to radiation; GO:0009409 response to cold; GO:0009414 response to water deprivation; GO:0009415 response to water; GO:0009416 response to light stimulus; GO:000960…	GO:0005623 cell; GO:0005886 plasma membrane; GO:0005911 cell-cell junction; GO:0009506 plasmodesma; GO:0016020 membrane; GO:0030054 cell junction; GO:0044464 cell part; GO:0055044 symplast; GO:0071944 cell periphery;		K19366	SPG20; spartin	map04144 Endocytosis
TRINITY_DN18267_c0_g1	squalene synthase	0.59	Down	0.0080396	---	43.173		1.251	1.236		0.887	0.756		1.154	1.247		0.689	0.728	chloroplast	GO:0006629 lipid metabolic process; GO:0006644 phospholipid metabolic process; GO:0006694 steroid biosynthetic process; GO:0006720 isoprenoid metabolic process; GO:0006721 terpenoid metabolic process; GO:0006793 phosphorus metabolic process; GO:0006796 phosphate-containing compound metabolic process; GO:0008152 metabolic process; GO:0008202 steroid metabolic process; GO:0008610 lipid biosynthetic…	GO:0005622 intracellular; GO:0005623 cell; GO:0005737 cytoplasm; GO:0005783 endoplasmic reticulum; GO:0005789 endoplasmic reticulum membrane; GO:0005886 plasma membrane; GO:0012505 endomembrane system; GO:0016020 membrane; GO:0031984 organelle subcompartment; GO:0042175 nuclear outer membrane-endoplasmic reticulum membrane network; GO:0043226 organelle; GO:0043227 membrane-bounded organelle; GO:0…	GO:0003824 catalytic activity; GO:0004310 farnesyl-diphosphate farnesyltransferase activity; GO:0004311 farnesyltranstransferase activity; GO:0004659 prenyltransferase activity; GO:0016740 transferase activity; GO:0016765 transferase activity, transferring alkyl or aryl (other than methyl) groups; GO:0051996 squalene synthase activity;	K00801	FDFT1; farnesyl-diphosphate farnesyltransferase [EC:2.5.1.21]	map00100 Steroid biosynthesis; map00909 Sesquiterpenoid and triterpenoid biosynthesis; map01100 Metabolic pathways; map01110 Biosynthesis of secondary metabolites	PF00494	Squalene/phytoene synthase
TRINITY_DN3726_c0_g1	phospho-2-dehydro-3-deoxyheptonate aldolase	0.411	Down	0.0021385	---	59.774	2.006	1.505	1.489	0.553	0.782	0.583	0.901	1.131	1.276	0.392	0.467	0.501	chloroplast		GO:0005622 intracellular; GO:0005623 cell; GO:0005737 cytoplasm; GO:0009507 chloroplast; GO:0009536 plastid; GO:0043226 organelle; GO:0043227 membrane-bounded organelle; GO:0043229 intracellular organelle; GO:0043231 intracellular membrane-bounded organelle; GO:0044424 intracellular part; GO:0044444 cytoplasmic part; GO:0044464 cell part;		K01626	E2.5.1.54, aroF, aroG, aroH; 3-deoxy-7-phosphoheptulonate synthase [EC:2.5.1.54]	map00400 Phenylalanine, tyrosine and tryptophan biosynthesis; map01100 Metabolic pathways; map01110 Biosynthesis of secondary metabolites; map01230 Biosynthesis of amino acids	PF01474	Class-II DAHP synthetase family
TRINITY_DN16899_c0_g1	RecName: Full=1-aminocyclopropane-1-carboxylate oxidase; Short=ACC oxidase; AltName: Full=Ethylene-forming enzyme; Short=EFE	0.413	Down	0.0133151	---	36.088	1.314	1.386	1.485	0.87	0.808	0.733	1.12	1.302	1.202	0.703	0.335	0.46	cytoskeleton	GO:0008152 metabolic process; GO:0009058 biosynthetic process; GO:0009692 ethylene metabolic process; GO:0009693 ethylene biosynthetic process; GO:0009987 cellular process; GO:0010817 regulation of hormone levels; GO:0042445 hormone metabolic process; GO:0042446 hormone biosynthetic process; GO:0043449 cellular alkene metabolic process; GO:0043450 alkene biosynthetic process; GO:0044237 cellular …			K05933	E1.14.17.4; aminocyclopropanecarboxylate oxidase [EC:1.14.17.4]	map00270 Cysteine and methionine metabolism; map01100 Metabolic pathways; map01110 Biosynthesis of secondary metabolites	PF03171	2OG-Fe(II) oxygenase superfamily
TRINITY_DN31194_c0_g1	chitinase/Hevein/PR-4/Wheatwin2	0.314	Down	0.0027994	---	23.652	2.537	2.386	2.446	0.601	0.77	0.423	0.592	0.546	0.688	0.137	0.194	0.243	extracellular	GO:0002376 immune system process; GO:0006139 nucleobase-containing compound metabolic process; GO:0006725 cellular aromatic compound metabolic process; GO:0006807 nitrogen compound metabolic process; GO:0006950 response to stress; GO:0006952 defense response; GO:0006955 immune response; GO:0006970 response to osmotic stress; GO:0008152 metabolic process; GO:0009605 response to external stimulus; …		GO:0003824 catalytic activity; GO:0004518 nuclease activity; GO:0004540 ribonuclease activity; GO:0005488 binding; GO:0008061 chitin binding; GO:0008144 drug binding; GO:0016787 hydrolase activity; GO:0016788 hydrolase activity, acting on ester bonds; GO:0097367 carbohydrate derivative binding;				PF00187; PF00967	Chitin recognition protein; Barwin family
TRINITY_DN11303_c0_g1	biotin synthase, mitochondrial	0.483	Down	0.0034579	---	41.056		1.314	1.41		0.676	0.553		1.298	1.349		0.664	0.615	chloroplast			GO:0005488 binding; GO:0008270 zinc ion binding; GO:0043167 ion binding; GO:0043169 cation binding; GO:0046872 metal ion binding; GO:0046914 transition metal ion binding;	K01012	bioB; biotin synthase [EC:2.8.1.6]	map00780 Biotin metabolism; map01100 Metabolic pathways	PF04055; PF06968	Radical SAM superfamily; Biotin and Thiamin Synthesis associated domain
TRINITY_DN5396_c0_g1	Aldehyde dehydrogenase family 2 member B4, mitochondrial	0.592	Down	0.0087414	---	58.077	1.487	1.384	1.417	0.843	0.808	0.802	1.074	1.089	1.092	0.583	0.689	0.654	mitochondria	GO:0008152 metabolic process; GO:0055114 oxidation-reduction process;		GO:0003824 catalytic activity; GO:0004029 aldehyde dehydrogenase (NAD) activity; GO:0016491 oxidoreductase activity; GO:0016620 oxidoreductase activity, acting on the aldehyde or oxo group of donors, NAD or NADP as acceptor; GO:0016903 oxidoreductase activity, acting on the aldehyde or oxo group of donors;	K00128	ALDH; aldehyde dehydrogenase (NAD+) [EC:1.2.1.3]	map00010 Glycolysis / Gluconeogenesis; map00053 Ascorbate and aldarate metabolism; map00071 Fatty acid degradation; map00280 Valine, leucine and isoleucine degradation; map00310 Lysine degradation; map00330 Arginine and proline metabolism; map00340 Histidine metabolism; map00380 Tryptophan metabolism; map00410 beta-Alanine metabolism; map00561 Glycerolipid metabolism; map00620 Pyruvate metabolism…
TRINITY_DN5269_c0_g1	bifunctional riboflavin biosynthesis protein RIBA 1, chloroplastic	0.473	Down	0.0144838	---	54.571	2.022	1.391	1.418	0.618	1.064	0.651	0.816	0.97	1.315	0.385	0.54	0.541	chloroplast	GO:0006766 vitamin metabolic process; GO:0006767 water-soluble vitamin metabolic process; GO:0006771 riboflavin metabolic process; GO:0006807 nitrogen compound metabolic process; GO:0008152 metabolic process; GO:0009058 biosynthetic process; GO:0009110 vitamin biosynthetic process; GO:0009231 riboflavin biosynthetic process; GO:0009987 cellular process; GO:0017144 drug metabolic process; GO:00181…	GO:0005622 intracellular; GO:0005623 cell; GO:0005737 cytoplasm; GO:0009507 chloroplast; GO:0009532 plastid stroma; GO:0009536 plastid; GO:0009570 chloroplast stroma; GO:0016020 membrane; GO:0043226 organelle; GO:0043227 membrane-bounded organelle; GO:0043229 intracellular organelle; GO:0043231 intracellular membrane-bounded organelle; GO:0044422 organelle part; GO:0044424 intracellular part; GO:…	GO:0003824 catalytic activity; GO:0003933 GTP cyclohydrolase activity; GO:0003935 GTP cyclohydrolase II activity; GO:0008686 3,4-dihydroxy-2-butanone-4-phosphate synthase activity; GO:0016787 hydrolase activity; GO:0016810 hydrolase activity, acting on carbon-nitrogen (but not peptide) bonds; GO:0016814 hydrolase activity, acting on carbon-nitrogen (but not peptide) bonds, in cyclic amidines; GO:…	K14652	ribBA; 3,4-dihydroxy 2-butanone 4-phosphate synthase / GTP cyclohydrolase II [EC:4.1.99.12 3.5.4.25]	map00740 Riboflavin metabolism; map00790 Folate biosynthesis; map01100 Metabolic pathways; map01110 Biosynthesis of secondary metabolites
TRINITY_DN38542_c0_g1	pathogenesis-related protein 10	0.409	Down	0.0139014	---	16.872	0.747	0.642	0.881	0.51	0.476	0.401	1.881	2.15	1.571	0.642	0.562	1.09	cytoplasm							PF00407	Pathogenesis-related protein Bet v I family
TRINITY_DN21280_c0_g1	protein EXORDIUM-like	0.583	Down	0.026523	---	33.776	1.017	1.371		1.058	0.862		1.274	1.072		0.699	0.669		chloroplast
TRINITY_DN32112_c0_g1	S-adenosylmethionine synthase 2 isoform D	0.312	Down	0.00091943	---	24.048	1.55	1.871	1.983	0.779	0.917	0.505	1.291	0.84	1.034	0.352	0.305	0.33	cytoplasm		GO:0005622 intracellular; GO:0005623 cell; GO:0005737 cytoplasm; GO:0005829 cytosol; GO:0044424 intracellular part; GO:0044444 cytoplasmic part; GO:0044464 cell part;	GO:0003824 catalytic activity; GO:0004478 methionine adenosyltransferase activity; GO:0016740 transferase activity; GO:0016765 transferase activity, transferring alkyl or aryl (other than methyl) groups;	K00789	metK; S-adenosylmethionine synthetase [EC:2.5.1.6]	map00270 Cysteine and methionine metabolism; map01100 Metabolic pathways; map01110 Biosynthesis of secondary metabolites; map01230 Biosynthesis of amino acids	PF00438; PF02772; PF02773	S-adenosylmethionine synthetase, N-terminal domain; S-adenosylmethionine synthetase, central domain; S-adenosylmethionine synthetase, C-terminal domain
TRINITY_DN4163_c0_g1	hypothetical protein TSUD_187010	0.651	Down	0.00152228	---	58.764	1.346	1.368	1.349	0.927	0.878	0.825	1.015	1.068	1.103	0.762	0.648	0.664	mitochondria	GO:0008152 metabolic process; GO:0055114 oxidation-reduction process;		GO:0003824 catalytic activity; GO:0004029 aldehyde dehydrogenase (NAD) activity; GO:0016491 oxidoreductase activity; GO:0016620 oxidoreductase activity, acting on the aldehyde or oxo group of donors, NAD or NADP as acceptor; GO:0016903 oxidoreductase activity, acting on the aldehyde or oxo group of donors;	K00128	ALDH; aldehyde dehydrogenase (NAD+) [EC:1.2.1.3]	map00010 Glycolysis / Gluconeogenesis; map00053 Ascorbate and aldarate metabolism; map00071 Fatty acid degradation; map00280 Valine, leucine and isoleucine degradation; map00310 Lysine degradation; map00330 Arginine and proline metabolism; map00340 Histidine metabolism; map00380 Tryptophan metabolism; map00410 beta-Alanine metabolism; map00561 Glycerolipid metabolism; map00620 Pyruvate metabolism…
TRINITY_DN37893_c0_g1	cell wall / vacuolar inhibitor of fructosidase 1	0.461	Down	0.0043781	---	19.948	1.624	1.308	1.603	0.893	0.718	0.772	0.92	1.412	1.031	0.541	0.498	0.513	chloroplast	GO:0000003 reproduction; GO:0000902 cell morphogenesis; GO:0000904 cell morphogenesis involved in differentiation; GO:0003006 developmental process involved in reproduction; GO:0009653 anatomical structure morphogenesis; GO:0009826 unidimensional cell growth; GO:0009856 pollination; GO:0009860 pollen tube growth; GO:0009932 cell tip growth; GO:0009987 cellular process; GO:0016043 cellular compone…	GO:0005618 cell wall; GO:0005623 cell; GO:0012505 endomembrane system; GO:0030312 external encapsulating structure; GO:0030427 site of polarized growth; GO:0035838 growing cell tip; GO:0042995 cell projection; GO:0044463 cell projection part; GO:0044464 cell part; GO:0051286 cell tip; GO:0071944 cell periphery; GO:0090404 pollen tube tip; GO:0090406 pollen tube;	GO:0004857 enzyme inhibitor activity; GO:0030234 enzyme regulator activity; GO:0046910 pectinesterase inhibitor activity; GO:0098772 molecular function regulator;				PF04043	Plant invertase/pectin methylesterase inhibitor
TRINITY_DN6694_c0_g1	uncharacterized protein LOC11410928	0.302	Down	0.0095563	---	54.24	2.372	1.83	2.092	0.39	0.419	0.387	0.798	1.158	1.095	0.302	0.315	0.304	cytoplasm
TRINITY_DN16284_c0_g1	RecName: Full=Probable cinnamyl alcohol dehydrogenase; Short=CAD	0.403	Down	0.0085001	---	38.913		1.616	1.61		0.457	0.663		1.337	1.133		0.491	0.505	cytoplasm				K00083	CAD; cinnamyl-alcohol dehydrogenase [EC:1.1.1.195]	map00940 Phenylpropanoid biosynthesis; map01100 Metabolic pathways; map01110 Biosynthesis of secondary metabolites	PF08240	Alcohol dehydrogenase GroES-like domain
TRINITY_DN27457_c0_g1	hypothetical protein TSUD_379590, partial	0.649	Down	0.048661	---	17.954	1.202	1.275	1.153	1.162	1.002	1.008	1.162	0.97	1.047	0.499	0.744	0.821	nucleus
TRINITY_DN2080_c0_g1	arogenate dehydrogenase 1, chloroplastic isoform X1	0.405	Down	0.002215	---	31.562	2.065	1.676	1.586	0.435	0.797	0.599	0.959	1.097	1.197	0.437	0.355	0.526	chloroplast				K15227	TYRAAT; arogenate dehydrogenase (NADP+), plant [EC:1.3.1.78]	map00400 Phenylalanine, tyrosine and tryptophan biosynthesis; map01100 Metabolic pathways; map01110 Biosynthesis of secondary metabolites; map01230 Biosynthesis of amino acids
TRINITY_DN29728_c0_g1	non-specific lipid transfer protein GPI-anchored 1	0.657	Down	0.00027577	---	24.156	1.31	1.327	1.394	1.197	1.119	0.953	0.892	0.955	0.977	0.643	0.597	0.616	chloroplast	GO:0006810 transport; GO:0006869 lipid transport; GO:0006950 response to stress; GO:0006952 defense response; GO:0007275 multicellular organism development; GO:0009605 response to external stimulus; GO:0009607 response to biotic stimulus; GO:0009620 response to fungus; GO:0010876 lipid localization; GO:0032501 multicellular organismal process; GO:0032502 developmental process; GO:0033036 macromol…	GO:0005618 cell wall; GO:0005622 intracellular; GO:0005623 cell; GO:0005737 cytoplasm; GO:0005783 endoplasmic reticulum; GO:0005794 Golgi apparatus; GO:0005886 plasma membrane; GO:0009505 plant-type cell wall; GO:0012505 endomembrane system; GO:0016020 membrane; GO:0030312 external encapsulating structure; GO:0031224 intrinsic component of membrane; GO:0031225 anchored component of membrane; GO:0…	GO:0005488 binding; GO:0008289 lipid binding;
TRINITY_DN1528_c0_g1	mini-chromosome maintenance 7	0.4	Down	0.0120418	---	29.231	1.827	1.537		0.626	0.97		1.022	1.068		0.459	0.376		cytoplasm	GO:0006139 nucleobase-containing compound metabolic process; GO:0006259 DNA metabolic process; GO:0006260 DNA replication; GO:0006261 DNA-dependent DNA replication; GO:0006268 DNA unwinding involved in DNA replication; GO:0006725 cellular aromatic compound metabolic process; GO:0006807 nitrogen compound metabolic process; GO:0006996 organelle organization; GO:0007154 cell communication; GO:000716…	GO:0000347 THO complex; GO:0005622 intracellular; GO:0005623 cell; GO:0005634 nucleus; GO:0005737 cytoplasm; GO:0032991 macromolecular complex; GO:0043226 organelle; GO:0043227 membrane-bounded organelle; GO:0043229 intracellular organelle; GO:0043231 intracellular membrane-bounded organelle; GO:0044422 organelle part; GO:0044424 intracellular part; GO:0044428 nuclear part; GO:0044446 intracellul…		K02210	MCM7, CDC47; DNA replication licensing factor MCM7 [EC:3.6.4.12]	map03030 DNA replication
TRINITY_DN3028_c0_g1	peptide transporter 1	0.623	Down	0.00135891	---	64.751	1.218	1.367	1.214	0.963	0.757	0.94	1.152	1.183	1.06	0.69	0.653	0.773	plasma membrane	GO:0006810 transport; GO:0006857 oligopeptide transport; GO:0015833 peptide transport; GO:0035672 oligopeptide transmembrane transport; GO:0042886 amide transport; GO:0042938 dipeptide transport; GO:0042939 tripeptide transport; GO:0051179 localization; GO:0051234 establishment of localization; GO:0055085 transmembrane transport; GO:0071702 organic substance transport; GO:0071705 nitrogen compoun…	GO:0000325 plant-type vacuole; GO:0005622 intracellular; GO:0005623 cell; GO:0005737 cytoplasm; GO:0005773 vacuole; GO:0005774 vacuolar membrane; GO:0005794 Golgi apparatus; GO:0009705 plant-type vacuole membrane; GO:0012505 endomembrane system; GO:0016020 membrane; GO:0031090 organelle membrane; GO:0043226 organelle; GO:0043227 membrane-bounded organelle; GO:0043229 intracellular organelle; GO:0…	GO:0005215 transporter activity; GO:0015334 high-affinity oligopeptide transporter activity; GO:0022857 transmembrane transporter activity; GO:0035673 oligopeptide transmembrane transporter activity; GO:0042887 amide transmembrane transporter activity; GO:0042937 tripeptide transporter activity; GO:1904680 peptide transmembrane transporter activity;	K14638	SLC15A3_4, PHT; solute carrier family 15 (peptide/histidine transporter), member 3/4
TRINITY_DN27668_c0_g1	hypothetical protein TSUD_133270	0.576	Down	0.0127186	---	32.533		1.23	1.262		0.894	0.716		1.189	1.297		0.748	0.683	chloroplast		GO:0005622 intracellular; GO:0005623 cell; GO:0005737 cytoplasm; GO:0005829 cytosol; GO:0044424 intracellular part; GO:0044444 cytoplasmic part; GO:0044464 cell part;		K08081	TR1; tropinone reductase I [EC:1.1.1.206]	map00960 Tropane, piperidine and pyridine alkaloid biosynthesis; map01100 Metabolic pathways; map01110 Biosynthesis of secondary metabolites	PF13561	Enoyl-(Acyl carrier protein) reductase
TRINITY_DN269_c0_g1	plasma membrane H(+)-ATPase precursor	0.641	Down	0.0136154	---	104.7	1.572	1.452	1.326	0.792	0.805	0.857	1.014	1.11	0.987	0.597	0.59	0.806	plasma membrane	GO:0001101 response to acid chemical; GO:0006810 transport; GO:0006811 ion transport; GO:0006812 cation transport; GO:0006950 response to stress; GO:0009414 response to water deprivation; GO:0009415 response to water; GO:0009628 response to abiotic stimulus; GO:0009719 response to endogenous stimulus; GO:0009725 response to hormone; GO:0009737 response to abscisic acid; GO:0009987 cellular proces…	GO:0005622 intracellular; GO:0005623 cell; GO:0005634 nucleus; GO:0005737 cytoplasm; GO:0005773 vacuole; GO:0005794 Golgi apparatus; GO:0005886 plasma membrane; GO:0005911 cell-cell junction; GO:0009506 plasmodesma; GO:0012505 endomembrane system; GO:0016020 membrane; GO:0016021 integral component of membrane; GO:0030054 cell junction; GO:0031224 intrinsic component of membrane; GO:0043226 organe…	GO:0000287 magnesium ion binding; GO:0003824 catalytic activity; GO:0005215 transporter activity; GO:0005488 binding; GO:0008324 cation transmembrane transporter activity; GO:0008553 hydrogen-exporting ATPase activity, phosphorylative mechanism; GO:0015075 ion transmembrane transporter activity; GO:0015077 monovalent inorganic cation transmembrane transporter activity; GO:0015078 hydrogen ion tra…	K01535	PMA1, PMA2; H+-transporting ATPase [EC:7.1.2.1]	map00190 Oxidative phosphorylation; map01100 Metabolic pathways	PF00690; PF00702	Cation transporter/ATPase, N-terminus; haloacid dehalogenase-like hydrolase
TRINITY_DN10073_c0_g1	metacaspase-5	0.598	Down	0.0039383	---	23.727	1.549	1.554	1.669	0.767	0.796	0.634	1.014	1.012	1.023	0.647	0.593	0.583	cytoplasm	GO:0000302 response to reactive oxygen species; GO:0006508 proteolysis; GO:0006807 nitrogen compound metabolic process; GO:0006950 response to stress; GO:0006979 response to oxidative stress; GO:0008152 metabolic process; GO:0008219 cell death; GO:0009314 response to radiation; GO:0009411 response to UV; GO:0009416 response to light stimulus; GO:0009628 response to abiotic stimulus; GO:0009636 re…	GO:0005622 intracellular; GO:0005623 cell; GO:0005737 cytoplasm; GO:0005829 cytosol; GO:0005886 plasma membrane; GO:0005911 cell-cell junction; GO:0009506 plasmodesma; GO:0009507 chloroplast; GO:0009536 plastid; GO:0016020 membrane; GO:0030054 cell junction; GO:0043226 organelle; GO:0043227 membrane-bounded organelle; GO:0043229 intracellular organelle; GO:0043231 intracellular membrane-bounded o…	GO:0003824 catalytic activity; GO:0004175 endopeptidase activity; GO:0004197 cysteine-type endopeptidase activity; GO:0005488 binding; GO:0005515 protein binding; GO:0008233 peptidase activity; GO:0008234 cysteine-type peptidase activity; GO:0016787 hydrolase activity; GO:0042802 identical protein binding; GO:0070011 peptidase activity, acting on L-amino acid peptides;				PF00656	Caspase domain
TRINITY_DN47119_c0_g1	gibberellin-regulated protein 4-like	0.216	Down	0.0097442	---	12.171	2.022	1.027	1.587	0.373	0.73	0.315	1.281	1.609	1.746	0.207	0.584	0.209	extracellular	GO:0001101 response to acid chemical; GO:0007154 cell communication; GO:0007165 signal transduction; GO:0009719 response to endogenous stimulus; GO:0009725 response to hormone; GO:0009739 response to gibberellin; GO:0009740 gibberellic acid mediated signaling pathway; GO:0009755 hormone-mediated signaling pathway; GO:0009987 cellular process; GO:0010033 response to organic substance; GO:0010476 g…	GO:0005576 extracellular region;
TRINITY_DN1966_c0_g1	hypothetical protein TSUD_370720	0.631	Down	0.0106766	---	68.76	1.43	1.33	1.481	0.803	0.824	0.721	1.018	1.199	0.985	0.724	0.567	0.729	chloroplast	GO:0008152 metabolic process; GO:0032259 methylation;	GO:0005622 intracellular; GO:0005623 cell; GO:0005737 cytoplasm; GO:0005768 endosome; GO:0005794 Golgi apparatus; GO:0005802 trans-Golgi network; GO:0012505 endomembrane system; GO:0016020 membrane; GO:0031410 cytoplasmic vesicle; GO:0031982 vesicle; GO:0031984 organelle subcompartment; GO:0043226 organelle; GO:0043227 membrane-bounded organelle; GO:0043229 intracellular organelle; GO:0043231 int…	GO:0003824 catalytic activity; GO:0008168 methyltransferase activity; GO:0008757 S-adenosylmethionine-dependent methyltransferase activity; GO:0016740 transferase activity; GO:0016741 transferase activity, transferring one-carbon groups;
TRINITY_DN10399_c0_g1	protein arginine N-methyltransferase PRMT10	0.513	Down	0.0031446	---	42.104		1.265	1.35		0.859	0.809		1.208	1.197		0.64	0.594	cytoplasm	GO:0000003 reproduction; GO:0003006 developmental process involved in reproduction; GO:0006325 chromatin organization; GO:0006355 regulation of transcription, DNA-templated; GO:0006464 cellular protein modification process; GO:0006479 protein methylation; GO:0006807 nitrogen compound metabolic process; GO:0006996 organelle organization; GO:0007275 multicellular organism development; GO:0008152 me…	GO:0005622 intracellular; GO:0005623 cell; GO:0005737 cytoplasm; GO:0005829 cytosol; GO:0044424 intracellular part; GO:0044444 cytoplasmic part; GO:0044464 cell part;	GO:0003824 catalytic activity; GO:0008168 methyltransferase activity; GO:0008170 N-methyltransferase activity; GO:0008276 protein methyltransferase activity; GO:0008469 histone-arginine N-methyltransferase activity; GO:0008757 S-adenosylmethionine-dependent methyltransferase activity; GO:0016273 arginine N-methyltransferase activity; GO:0016274 protein-arginine N-methyltransferase activity; GO:00…	K11434	PRMT1; type I protein arginine methyltransferase [EC:2.1.1.319]
TRINITY_DN24629_c0_g1	dehydrin-cognate	0.532	Down	0.0023768	---	24.006	1.329	1.365	1.354	0.85	0.856	0.863	1.123	1.193	1.011	0.548	0.535	0.686	nucleus	GO:0001101 response to acid chemical; GO:0006950 response to stress; GO:0009266 response to temperature stimulus; GO:0009409 response to cold; GO:0009414 response to water deprivation; GO:0009415 response to water; GO:0009628 response to abiotic stimulus; GO:0009631 cold acclimation; GO:0009719 response to endogenous stimulus; GO:0009725 response to hormone; GO:0009737 response to abscisic acid; …	GO:0005622 intracellular; GO:0005623 cell; GO:0005634 nucleus; GO:0005737 cytoplasm; GO:0005829 cytosol; GO:0005911 cell-cell junction; GO:0009506 plasmodesma; GO:0016020 membrane; GO:0019898 extrinsic component of membrane; GO:0030054 cell junction; GO:0043226 organelle; GO:0043227 membrane-bounded organelle; GO:0043229 intracellular organelle; GO:0043231 intracellular membrane-bounded organelle…	GO:0001786 phosphatidylserine binding; GO:0003779 actin binding; GO:0005488 binding; GO:0005507 copper ion binding; GO:0005515 protein binding; GO:0005543 phospholipid binding; GO:0008092 cytoskeletal protein binding; GO:0008289 lipid binding; GO:0016151 nickel cation binding; GO:0031210 phosphatidylcholine binding; GO:0043167 ion binding; GO:0043168 anion binding; GO:0043169 cation binding; GO:0…
TRINITY_DN17998_c0_g1	peroxidase	0.305	Down	0.0035815	---	38.272	1.628	1.428	1.921	0.742	0.569	0.472	1.115	1.569	0.993	0.311	0.331	0.481	extracellular	GO:0000902 cell morphogenesis; GO:0002682 regulation of immune system process; GO:0002684 positive regulation of immune system process; GO:0006950 response to stress; GO:0006952 defense response; GO:0006970 response to osmotic stress; GO:0008152 metabolic process; GO:0009314 response to radiation; GO:0009416 response to light stimulus; GO:0009605 response to external stimulus; GO:0009607 response…	GO:0005576 extracellular region; GO:0005618 cell wall; GO:0005622 intracellular; GO:0005623 cell; GO:0005737 cytoplasm; GO:0005773 vacuole; GO:0005774 vacuolar membrane; GO:0005794 Golgi apparatus; GO:0009505 plant-type cell wall; GO:0012505 endomembrane system; GO:0016020 membrane; GO:0030312 external encapsulating structure; GO:0031090 organelle membrane; GO:0043226 organelle; GO:0043227 membra…	GO:0003824 catalytic activity; GO:0004601 peroxidase activity; GO:0016209 antioxidant activity; GO:0016491 oxidoreductase activity; GO:0016684 oxidoreductase activity, acting on peroxide as acceptor;	K00430	E1.11.1.7; peroxidase [EC:1.11.1.7]	map00940 Phenylpropanoid biosynthesis; map01100 Metabolic pathways; map01110 Biosynthesis of secondary metabolites	PF00141	Peroxidase
TRINITY_DN7567_c0_g1	malate synthase, glyoxysomal	0.36	Down	0.00098068	---	61.168	1.399	1.248	1.24	0.713	0.665	0.553	1.29	1.435	1.513	0.455	0.445	0.625	peroxisome	GO:0005975 carbohydrate metabolic process; GO:0006081 cellular aldehyde metabolic process; GO:0006082 organic acid metabolic process; GO:0006097 glyoxylate cycle; GO:0008152 metabolic process; GO:0009987 cellular process; GO:0019752 carboxylic acid metabolic process; GO:0032787 monocarboxylic acid metabolic process; GO:0043436 oxoacid metabolic process; GO:0044237 cellular metabolic process; GO:0…	GO:0005622 intracellular; GO:0005623 cell; GO:0005737 cytoplasm; GO:0005777 peroxisome; GO:0009514 glyoxysome; GO:0042579 microbody; GO:0043226 organelle; GO:0043227 membrane-bounded organelle; GO:0043229 intracellular organelle; GO:0043231 intracellular membrane-bounded organelle; GO:0044424 intracellular part; GO:0044444 cytoplasmic part; GO:0044464 cell part;	GO:0003824 catalytic activity; GO:0004474 malate synthase activity; GO:0016740 transferase activity; GO:0016746 transferase activity, transferring acyl groups; GO:0046912 transferase activity, transferring acyl groups, acyl groups converted into alkyl on transfer;	K01638	aceB, glcB; malate synthase [EC:2.3.3.9]	map00620 Pyruvate metabolism; map00630 Glyoxylate and dicarboxylate metabolism; map01100 Metabolic pathways; map01110 Biosynthesis of secondary metabolites; map01200 Carbon metabolism
TRINITY_DN7931_c0_g1	la protein 1	0.663	Down	0.0198189	---	57.483	1.366	1.285	1.215	1.026	1.129	1.036	0.93	0.91	1.093	0.656	0.649	0.639	nucleus	GO:0006139 nucleobase-containing compound metabolic process; GO:0006396 RNA processing; GO:0006399 tRNA metabolic process; GO:0006725 cellular aromatic compound metabolic process; GO:0006807 nitrogen compound metabolic process; GO:0008033 tRNA processing; GO:0008152 metabolic process; GO:0009987 cellular process; GO:0010467 gene expression; GO:0016070 RNA metabolic process; GO:0034470 ncRNA proce…	GO:0005618 cell wall; GO:0005622 intracellular; GO:0005623 cell; GO:0005634 nucleus; GO:0005654 nucleoplasm; GO:0005730 nucleolus; GO:0005737 cytoplasm; GO:0005829 cytosol; GO:0030312 external encapsulating structure; GO:0031974 membrane-enclosed lumen; GO:0031981 nuclear lumen; GO:0043226 organelle; GO:0043227 membrane-bounded organelle; GO:0043228 non-membrane-bounded organelle; GO:0043229 intr…	GO:0000049 tRNA binding; GO:0003676 nucleic acid binding; GO:0003723 RNA binding; GO:0005488 binding; GO:0097159 organic cyclic compound binding; GO:1901363 heterocyclic compound binding;	K11090	LA, SSB; lupus La protein		PF05383; PF00076; PF08777	La domain; RNA recognition motif. (a.k.a. RRM, RBD, or RNP domain); RNA binding motif
TRINITY_DN1575_c0_g1	glyoxysomal fatty acid beta-oxidation multifunctional protein MFP-a	0.631	Down	0.0067035	---	78.785	1.175	1.111	1.113	0.787	0.779	0.707	1.18	1.327	1.37	0.927	0.708	0.811	cytoplasm	GO:0006082 organic acid metabolic process; GO:0006629 lipid metabolic process; GO:0006631 fatty acid metabolic process; GO:0006635 fatty acid beta-oxidation; GO:0008152 metabolic process; GO:0009056 catabolic process; GO:0009062 fatty acid catabolic process; GO:0009987 cellular process; GO:0016042 lipid catabolic process; GO:0016054 organic acid catabolic process; GO:0019395 fatty acid oxidation;…	GO:0005618 cell wall; GO:0005622 intracellular; GO:0005623 cell; GO:0005634 nucleus; GO:0005730 nucleolus; GO:0005737 cytoplasm; GO:0005777 peroxisome; GO:0005911 cell-cell junction; GO:0009506 plasmodesma; GO:0009514 glyoxysome; GO:0030054 cell junction; GO:0030312 external encapsulating structure; GO:0031974 membrane-enclosed lumen; GO:0031981 nuclear lumen; GO:0042579 microbody; GO:0043226 org…	GO:0003824 catalytic activity; GO:0003857 3-hydroxyacyl-CoA dehydrogenase activity; GO:0004165 dodecenoyl-CoA delta-isomerase activity; GO:0004300 enoyl-CoA hydratase activity; GO:0008692 3-hydroxybutyryl-CoA epimerase activity; GO:0016491 oxidoreductase activity; GO:0016508 long-chain-enoyl-CoA hydratase activity; GO:0016614 oxidoreductase activity, acting on CH-OH group of donors; GO:0016616 ox…	K10527	MFP2; enoyl-CoA hydratase/3-hydroxyacyl-CoA dehydrogenase [EC:4.2.1.17 1.1.1.35 1.1.1.211]	map00071 Fatty acid degradation; map00592 alpha-Linolenic acid metabolism; map01100 Metabolic pathways; map01110 Biosynthesis of secondary metabolites; map01212 Fatty acid metabolism	PF00378; PF02737; PF00725	Enoyl-CoA hydratase/isomerase family; 3-hydroxyacyl-CoA dehydrogenase, NAD binding domain; 3-hydroxyacyl-CoA dehydrogenase, C-terminal domain
TRINITY_DN34989_c0_g1	1,4-dihydroxy-2-naphthoyl-CoA thioesterase 1	0.635	Down	0.0109761	---	17.318	1.404	1.14	1.344	0.707	0.997	0.815	1.161	1.177	0.989	0.613	0.68	0.821	cytoplasm	GO:0006732 coenzyme metabolic process; GO:0006766 vitamin metabolic process; GO:0008152 metabolic process; GO:0009058 biosynthetic process; GO:0009108 coenzyme biosynthetic process; GO:0009110 vitamin biosynthetic process; GO:0009987 cellular process; GO:0016043 cellular component organization; GO:0022607 cellular component assembly; GO:0042180 cellular ketone metabolic process; GO:0042181 ketone…	GO:0005622 intracellular; GO:0005623 cell; GO:0005737 cytoplasm; GO:0005777 peroxisome; GO:0042579 microbody; GO:0043226 organelle; GO:0043227 membrane-bounded organelle; GO:0043229 intracellular organelle; GO:0043231 intracellular membrane-bounded organelle; GO:0044424 intracellular part; GO:0044444 cytoplasmic part; GO:0044464 cell part;		K19222	menI, DHNAT; 1,4-dihydroxy-2-naphthoyl-CoA hydrolase [EC:3.1.2.28]	map00130 Ubiquinone and other terpenoid-quinone biosynthesis; map01100 Metabolic pathways; map01110 Biosynthesis of secondary metabolites	PF03061	Thioesterase superfamily
TRINITY_DN17940_c0_g1	hypothetical protein TSUD_222020	0.608	Down	0.0111779	---	30.618	1.453	1.438	0.981	0.818	0.786	0.886	1.021	1.124	1.333	0.7	0.609	0.804	chloroplast	GO:0003333 amino acid transmembrane transport; GO:0006810 transport; GO:0006811 ion transport; GO:0006812 cation transport; GO:0006820 anion transport; GO:0006839 mitochondrial transport; GO:0006855 drug transmembrane transport; GO:0006865 amino acid transport; GO:0015711 organic anion transport; GO:0015807 L-amino acid transport; GO:0015822 ornithine transport; GO:0015849 organic acid transport;…	GO:0005622 intracellular; GO:0005623 cell; GO:0005737 cytoplasm; GO:0005739 mitochondrion; GO:0005740 mitochondrial envelope; GO:0005743 mitochondrial inner membrane; GO:0009507 chloroplast; GO:0009536 plastid; GO:0016020 membrane; GO:0016021 integral component of membrane; GO:0019866 organelle inner membrane; GO:0031090 organelle membrane; GO:0031224 intrinsic component of membrane; GO:0031966 m…	GO:0000064 L-ornithine transmembrane transporter activity; GO:0005215 transporter activity; GO:0005342 organic acid transmembrane transporter activity; GO:0008324 cation transmembrane transporter activity; GO:0008509 anion transmembrane transporter activity; GO:0008514 organic anion transmembrane transporter activity; GO:0015075 ion transmembrane transporter activity; GO:0015171 amino acid transm…	K15109	SLC25A20_29, CACT, CACL, CRC1; solute carrier family 25 (mitochondrial carnitine/acylcarnitine transporter), member 20/29
TRINITY_DN18456_c0_g1	protein DMR6-LIKE OXYGENASE 1 isoform X1	0.452	Down	0.0101438	---	40.165	1.408	1.259	1.4	0.72	0.824	0.704	1.439	1.183	1.218	0.407	0.71	0.619	cytoplasm							PF03171	2OG-Fe(II) oxygenase superfamily
TRINITY_DN14010_c0_g1	hypothetical protein TSUD_330260	0.484	Down	0.00193901	---	28.947	1.588	1.725	1.415	0.706	0.64	0.616	1.146	1.071	1.09	0.572	0.433	0.594	cytoplasm	GO:0008152 metabolic process; GO:0032259 methylation;	GO:0005622 intracellular; GO:0005623 cell; GO:0005737 cytoplasm; GO:0044424 intracellular part; GO:0044464 cell part;	GO:0003824 catalytic activity; GO:0008168 methyltransferase activity; GO:0008757 S-adenosylmethionine-dependent methyltransferase activity; GO:0016740 transferase activity; GO:0016741 transferase activity, transferring one-carbon groups;				PF08241	Methyltransferase domain
TRINITY_DN7866_c0_g1	S-adenosylmethionine synthetase-2	0.236	Down	0.00043813	---	27.996	2.17	2.06	2.005	0.422	0.609	0.354	1.03	1.015	1.17	0.256	0.197	0.307	cytoplasm		GO:0005622 intracellular; GO:0005623 cell; GO:0005737 cytoplasm; GO:0005829 cytosol; GO:0044424 intracellular part; GO:0044444 cytoplasmic part; GO:0044464 cell part;	GO:0003824 catalytic activity; GO:0004478 methionine adenosyltransferase activity; GO:0016740 transferase activity; GO:0016765 transferase activity, transferring alkyl or aryl (other than methyl) groups;	K00789	metK; S-adenosylmethionine synthetase [EC:2.5.1.6]	map00270 Cysteine and methionine metabolism; map01100 Metabolic pathways; map01110 Biosynthesis of secondary metabolites; map01230 Biosynthesis of amino acids	PF02772; PF02773	S-adenosylmethionine synthetase, central domain; S-adenosylmethionine synthetase, C-terminal domain
TRINITY_DN14916_c0_g1	uncharacterized protein LOC11433574	0.497	Down	0.0029766	---	40.598	1.31	1.121	1.067	0.823	1.08	0.884	1.134	1.17	1.462	0.714	0.599	0.559	cytoplasm							PF04862	Protein of unknown function, DUF642
TRINITY_DN110_c0_g1	RecName: Full=Phytochrome A	0.442	Down	0.000104668	---	123.91	1.485	1.426	1.521	0.641	0.803	0.591	1.145	1.193	1.28	0.578	0.501	0.52	chloroplast	GO:0006417 regulation of translation; GO:0006464 cellular protein modification process; GO:0006468 protein phosphorylation; GO:0006793 phosphorus metabolic process; GO:0006796 phosphate-containing compound metabolic process; GO:0006807 nitrogen compound metabolic process; GO:0007154 cell communication; GO:0007165 signal transduction; GO:0007275 multicellular organism development; GO:0007602 photo…	GO:0005622 intracellular; GO:0005623 cell; GO:0005634 nucleus; GO:0005654 nucleoplasm; GO:0005737 cytoplasm; GO:0016604 nuclear body; GO:0031974 membrane-enclosed lumen; GO:0031981 nuclear lumen; GO:0043226 organelle; GO:0043227 membrane-bounded organelle; GO:0043229 intracellular organelle; GO:0043231 intracellular membrane-bounded organelle; GO:0043233 organelle lumen; GO:0044422 organelle part…	GO:0003676 nucleic acid binding; GO:0003723 RNA binding; GO:0003729 mRNA binding; GO:0003824 catalytic activity; GO:0004672 protein kinase activity; GO:0005488 binding; GO:0005515 protein binding; GO:0009881 photoreceptor activity; GO:0009883 red or far-red light photoreceptor activity; GO:0016301 kinase activity; GO:0016740 transferase activity; GO:0016772 transferase activity, transferring phos…	K12120	PHYA; phytochrome A	map04712 Circadian rhythm - plant	PF08446; PF01590; PF00989; PF00512; PF02518	PAS fold; GAF domain; PAS fold; His Kinase A (phospho-acceptor) domain; Histidine kinase-, DNA gyrase B-, and HSP90-like ATPase
TRINITY_DN29341_c0_g1	glutathione S-transferase u17, partial	0.541	Down	0.00151689	---	25.185	1.634	1.365	1.489	0.941	1.015	0.936	0.937	1.066	0.916	0.466	0.53	0.582	chloroplast	GO:0006518 peptide metabolic process; GO:0006575 cellular modified amino acid metabolic process; GO:0006749 glutathione metabolic process; GO:0006790 sulfur compound metabolic process; GO:0006807 nitrogen compound metabolic process; GO:0006950 response to stress; GO:0006970 response to osmotic stress; GO:0007275 multicellular organism development; GO:0008152 metabolic process; GO:0009056 cataboli…	GO:0005622 intracellular; GO:0005623 cell; GO:0005737 cytoplasm; GO:0009507 chloroplast; GO:0009536 plastid; GO:0043226 organelle; GO:0043227 membrane-bounded organelle; GO:0043229 intracellular organelle; GO:0043231 intracellular membrane-bounded organelle; GO:0044424 intracellular part; GO:0044444 cytoplasmic part; GO:0044464 cell part;	GO:0003824 catalytic activity; GO:0004364 glutathione transferase activity; GO:0016740 transferase activity; GO:0016765 transferase activity, transferring alkyl or aryl (other than methyl) groups;	K00799	GST, gst; glutathione S-transferase [EC:2.5.1.18]	map00480 Glutathione metabolism; map01100 Metabolic pathways	PF02798; PF00043	Glutathione S-transferase, N-terminal domain; Glutathione S-transferase, C-terminal domain
TRINITY_DN9508_c0_g1	S-adenosylmethionine synthase	0.253	Down	0.000142504	---	42.981	2.219	1.971	2.022	0.503	0.707	0.426	0.932	0.998	1.078	0.228	0.233	0.3	cytoplasm		GO:0005622 intracellular; GO:0005623 cell; GO:0005737 cytoplasm; GO:0005829 cytosol; GO:0044424 intracellular part; GO:0044444 cytoplasmic part; GO:0044464 cell part;	GO:0003824 catalytic activity; GO:0004478 methionine adenosyltransferase activity; GO:0016740 transferase activity; GO:0016765 transferase activity, transferring alkyl or aryl (other than methyl) groups;	K00789	metK; S-adenosylmethionine synthetase [EC:2.5.1.6]	map00270 Cysteine and methionine metabolism; map01100 Metabolic pathways; map01110 Biosynthesis of secondary metabolites; map01230 Biosynthesis of amino acids	PF00438; PF02772; PF02773	S-adenosylmethionine synthetase, N-terminal domain; S-adenosylmethionine synthetase, central domain; S-adenosylmethionine synthetase, C-terminal domain
TRINITY_DN32691_c0_g1	hypothetical protein TSUD_116880	0.448	Down	0.00093868	---	29.034	1.08	0.955	1.334	0.692	0.688	0.631	1.608	1.637	1.267	0.627	0.678	0.716	cytoplasm							PF04043	Plant invertase/pectin methylesterase inhibitor
TRINITY_DN42442_c0_g1	hypothetical protein TSUD_343720	0.491	Down	0.0156966	---	20.847		1.355	1.377		0.912	0.658		1.151	1.266		0.548	0.639	cytoplasm	GO:0006508 proteolysis; GO:0006807 nitrogen compound metabolic process; GO:0008152 metabolic process; GO:0009056 catabolic process; GO:0009057 macromolecule catabolic process; GO:0009987 cellular process; GO:0019538 protein metabolic process; GO:0030163 protein catabolic process; GO:0043170 macromolecule metabolic process; GO:0044237 cellular metabolic process; GO:0044238 primary metabolic proces…	GO:0000323 lytic vacuole; GO:0005576 extracellular region; GO:0005615 extracellular space; GO:0005622 intracellular; GO:0005623 cell; GO:0005737 cytoplasm; GO:0005764 lysosome; GO:0005773 vacuole; GO:0005829 cytosol; GO:0043226 organelle; GO:0043227 membrane-bounded organelle; GO:0043229 intracellular organelle; GO:0043231 intracellular membrane-bounded organelle; GO:0044421 extracellular region …	GO:0003824 catalytic activity; GO:0004175 endopeptidase activity; GO:0004197 cysteine-type endopeptidase activity; GO:0008233 peptidase activity; GO:0008234 cysteine-type peptidase activity; GO:0016787 hydrolase activity; GO:0070011 peptidase activity, acting on L-amino acid peptides;	K01363	CTSB; cathepsin B [EC:3.4.22.1]		PF00112	Papain family cysteine protease
TRINITY_DN6439_c0_g1	cytochrome P450 monooxygenase	0.434	Down	0.020977	---	52.828		1.31	1.417		0.914	0.703		1.204	1.272		0.537	0.538	cytoplasm	GO:0006082 organic acid metabolic process; GO:0006629 lipid metabolic process; GO:0006720 isoprenoid metabolic process; GO:0006721 terpenoid metabolic process; GO:0006722 triterpenoid metabolic process; GO:0008152 metabolic process; GO:0008299 isoprenoid biosynthetic process; GO:0008300 isoprenoid catabolic process; GO:0008610 lipid biosynthetic process; GO:0009056 catabolic process; GO:0009058 b…		GO:0003824 catalytic activity; GO:0004497 monooxygenase activity; GO:0016491 oxidoreductase activity; GO:0016705 oxidoreductase activity, acting on paired donors, with incorporation or reduction of molecular oxygen; GO:0016709 oxidoreductase activity, acting on paired donors, with incorporation or reduction of molecular oxygen, NAD(P)H as one donor, and incorporation of one atom of oxygen;	K07428	CYP4X; cytochrome P450 family 4 subfamily X [EC:1.14.14.1]		PF00067	Cytochrome P450
TRINITY_DN7416_c0_g1	S-adenosylmethionine synthase 3	0.552	Down	0.043142	---	42.646	2.064	1.68		0.483	0.746		0.908	0.944		0.446	0.576		cytoskeleton		GO:0005622 intracellular; GO:0005623 cell; GO:0005737 cytoplasm; GO:0005829 cytosol; GO:0044424 intracellular part; GO:0044444 cytoplasmic part; GO:0044464 cell part;	GO:0003824 catalytic activity; GO:0004478 methionine adenosyltransferase activity; GO:0016740 transferase activity; GO:0016765 transferase activity, transferring alkyl or aryl (other than methyl) groups;	K00789	metK; S-adenosylmethionine synthetase [EC:2.5.1.6]	map00270 Cysteine and methionine metabolism; map01100 Metabolic pathways; map01110 Biosynthesis of secondary metabolites; map01230 Biosynthesis of amino acids	PF00438; PF02772; PF02773	S-adenosylmethionine synthetase, N-terminal domain; S-adenosylmethionine synthetase, central domain; S-adenosylmethionine synthetase, C-terminal domain
TRINITY_DN12719_c0_g1	ADP,ATP carrier protein mitochondrial-like	0.647	Down	0.043238	---	40.427	1.453	1.452	1.25	0.85	0.727	0.784	0.932	1.213	1.18	0.842	0.552	0.758	chloroplast	GO:0006810 transport; GO:0006811 ion transport; GO:0006820 anion transport; GO:0006839 mitochondrial transport; GO:0006855 drug transmembrane transport; GO:0006862 nucleotide transport; GO:0006996 organelle organization; GO:0007005 mitochondrion organization; GO:0007006 mitochondrial membrane organization; GO:0009987 cellular process; GO:0015711 organic anion transport; GO:0015748 organophosphate…	GO:0005618 cell wall; GO:0005622 intracellular; GO:0005623 cell; GO:0005634 nucleus; GO:0005730 nucleolus; GO:0005737 cytoplasm; GO:0005739 mitochondrion; GO:0005740 mitochondrial envelope; GO:0005743 mitochondrial inner membrane; GO:0005773 vacuole; GO:0005774 vacuolar membrane; GO:0005886 plasma membrane; GO:0009507 chloroplast; GO:0009526 plastid envelope; GO:0009536 plastid; GO:0009941 chloro…	GO:0000295 adenine nucleotide transmembrane transporter activity; GO:0005215 transporter activity; GO:0005346 purine ribonucleotide transmembrane transporter activity; GO:0005347 ATP transmembrane transporter activity; GO:0005471 ATP:ADP antiporter activity; GO:0005488 binding; GO:0005507 copper ion binding; GO:0008509 anion transmembrane transporter activity; GO:0008514 organic anion transmembra…	K05863	SLC25A4S, ANT; solute carrier family 25 (mitochondrial adenine nucleotide translocator), member 4/5/6/31
TRINITY_DN2617_c0_g1	hypothetical protein TSUD_222760, partial	0.338	Down	0.023478	---	68.226	1.675	1.65	1.87	0.616	0.871	0.429	1.116	1.176	1.121	0.524	0.298	0.331	cytoplasm	GO:0008152 metabolic process; GO:0032259 methylation;	GO:0005622 intracellular; GO:0005623 cell; GO:0005737 cytoplasm; GO:0005768 endosome; GO:0005794 Golgi apparatus; GO:0005802 trans-Golgi network; GO:0012505 endomembrane system; GO:0031410 cytoplasmic vesicle; GO:0031982 vesicle; GO:0031984 organelle subcompartment; GO:0043226 organelle; GO:0043227 membrane-bounded organelle; GO:0043229 intracellular organelle; GO:0043231 intracellular membrane-b…	GO:0003824 catalytic activity; GO:0008168 methyltransferase activity; GO:0008757 S-adenosylmethionine-dependent methyltransferase activity; GO:0016740 transferase activity; GO:0016741 transferase activity, transferring one-carbon groups;
TRINITY_DN17824_c0_g1	ribonucleoside-diphosphate reductase small chain-like protein	0.629	Down	0.034898	---	37.711	1.394	1.356	1.524	0.788	1.008	0.804	1.133	1.103	0.861	0.678	0.506	0.763	chloroplast	GO:0006139 nucleobase-containing compound metabolic process; GO:0006259 DNA metabolic process; GO:0006260 DNA replication; GO:0006281 DNA repair; GO:0006725 cellular aromatic compound metabolic process; GO:0006807 nitrogen compound metabolic process; GO:0006950 response to stress; GO:0006974 cellular response to DNA damage stimulus; GO:0007275 multicellular organism development; GO:0008152 metabo…			K10808	RRM2; ribonucleoside-diphosphate reductase subunit M2 [EC:1.17.4.1]	map00230 Purine metabolism; map00240 Pyrimidine metabolism; map00480 Glutathione metabolism; map01100 Metabolic pathways	PF00268	Ribonucleotide reductase, small chain
TRINITY_DN14515_c0_g1	RecName: Full=Bifunctional UDP-glucose 4-epimerase and UDP-xylose 4-epimerase 1; AltName: Full=UDP-D-xylose 4-epimerase; AltName: Full=UDP-L-arabinose 4-epimerase; AltName: Full=UDP-galactose 4-epimerase 1; AltName: Full=UDP-glucose 4-epimerase 1; Short=PsUGE1	0.577	Down	0.0051629	---	38.886	1.172	1.139	1.101	0.811	0.788	0.673	1.143	1.302	1.489	0.854	0.706	0.708	chloroplast	GO:0007275 multicellular organism development; GO:0009555 pollen development; GO:0032501 multicellular organismal process; GO:0032502 developmental process; GO:0048229 gametophyte development; GO:0048856 anatomical structure development;	GO:0005622 intracellular; GO:0005623 cell; GO:0005737 cytoplasm; GO:0005829 cytosol; GO:0005886 plasma membrane; GO:0016020 membrane; GO:0044424 intracellular part; GO:0044444 cytoplasmic part; GO:0044464 cell part; GO:0071944 cell periphery;	GO:0003824 catalytic activity; GO:0003978 UDP-glucose 4-epimerase activity; GO:0016853 isomerase activity; GO:0016854 racemase and epimerase activity; GO:0016857 racemase and epimerase activity, acting on carbohydrates and derivatives; GO:0050373 UDP-arabinose 4-epimerase activity;	K01784	galE, GALE; UDP-glucose 4-epimerase [EC:5.1.3.2]	map00052 Galactose metabolism; map00520 Amino sugar and nucleotide sugar metabolism; map01100 Metabolic pathways
TRINITY_DN19196_c0_g1	1-aminocyclopropane-1-carboxylate oxidase 2	0.27	Down	0.00069949	---	35.726	2.064	1.748	1.733	0.426	0.455	0.317	1.076	1.271	1.505	0.325	0.416	0.299	cytoplasm	GO:0000302 response to reactive oxygen species; GO:0001101 response to acid chemical; GO:0006950 response to stress; GO:0006970 response to osmotic stress; GO:0006979 response to oxidative stress; GO:0008152 metabolic process; GO:0009058 biosynthetic process; GO:0009593 detection of chemical stimulus; GO:0009605 response to external stimulus; GO:0009607 response to biotic stimulus; GO:0009620 res…	GO:0005618 cell wall; GO:0005622 intracellular; GO:0005623 cell; GO:0005737 cytoplasm; GO:0005783 endoplasmic reticulum; GO:0005794 Golgi apparatus; GO:0005829 cytosol; GO:0005886 plasma membrane; GO:0005911 cell-cell junction; GO:0009506 plasmodesma; GO:0012505 endomembrane system; GO:0016020 membrane; GO:0030054 cell junction; GO:0030312 external encapsulating structure; GO:0043226 organelle; G…	GO:0003824 catalytic activity; GO:0005488 binding; GO:0005507 copper ion binding; GO:0009815 1-aminocyclopropane-1-carboxylate oxidase activity; GO:0016491 oxidoreductase activity; GO:0016638 oxidoreductase activity, acting on the CH-NH2 group of donors; GO:0016641 oxidoreductase activity, acting on the CH-NH2 group of donors, oxygen as acceptor; GO:0043167 ion binding; GO:0043169 cation binding;…	K05933	E1.14.17.4; aminocyclopropanecarboxylate oxidase [EC:1.14.17.4]	map00270 Cysteine and methionine metabolism; map01100 Metabolic pathways; map01110 Biosynthesis of secondary metabolites	PF03171	2OG-Fe(II) oxygenase superfamily
TRINITY_DN15478_c0_g1	bifunctional dTDP-4-dehydrorhamnose 3,5-epimerase/dTDP-4-dehydrorhamnose reductase	0.427	Down	0.00052288	---	33.556	1.811	1.519	1.544	0.554	0.752	0.432	1.083	1.151	1.41	0.517	0.54	0.498	cytoplasm	GO:0006139 nucleobase-containing compound metabolic process; GO:0006725 cellular aromatic compound metabolic process; GO:0006793 phosphorus metabolic process; GO:0006807 nitrogen compound metabolic process; GO:0006810 transport; GO:0008152 metabolic process; GO:0009058 biosynthetic process; GO:0009225 nucleotide-sugar metabolic process; GO:0009226 nucleotide-sugar biosynthetic process; GO:0009812…	GO:0005622 intracellular; GO:0005623 cell; GO:0005737 cytoplasm; GO:0005829 cytosol; GO:0005911 cell-cell junction; GO:0009506 plasmodesma; GO:0030054 cell junction; GO:0044424 intracellular part; GO:0044444 cytoplasmic part; GO:0044464 cell part; GO:0055044 symplast;	GO:0003824 catalytic activity; GO:0010280 UDP-L-rhamnose synthase activity; GO:0016829 lyase activity; GO:0016835 carbon-oxygen lyase activity; GO:0016836 hydro-lyase activity; GO:0050377 UDP-glucose 4,6-dehydratase activity;	K12451	UER1; 3,5-epimerase/4-reductase [EC:5.1.3.- 1.1.1.-]	map00520 Amino sugar and nucleotide sugar metabolism; map01100 Metabolic pathways	PF04321	RmlD substrate binding domain
TRINITY_DN10713_c0_g1	hypothetical protein TSUD_389660	0.577	Down	0.029764	---	34.382	1.664	1.332	1.456	0.621	0.912	0.726	0.877	1.232	1.295	0.799	0.546	0.618	cytoplasm		GO:0005622 intracellular; GO:0005623 cell; GO:0043226 organelle; GO:0043227 membrane-bounded organelle; GO:0043229 intracellular organelle; GO:0043231 intracellular membrane-bounded organelle; GO:0044424 intracellular part; GO:0044464 cell part;	GO:0003824 catalytic activity; GO:0008194 UDP-glycosyltransferase activity; GO:0016740 transferase activity; GO:0016757 transferase activity, transferring glycosyl groups; GO:0016758 transferase activity, transferring hexosyl groups; GO:0035251 UDP-glucosyltransferase activity; GO:0046527 glucosyltransferase activity; GO:0080043 quercetin 3-O-glucosyltransferase activity; GO:0080044 quercetin 7-O…	K18823	UGT91H4; soyasaponin III rhamnosyltransferase [EC:2.4.1.273]
TRINITY_DN958_c0_g1	lipoxygenase	0.402	Down	0.012596	---	66.028	2.16	1.564	1.696	0.474	0.566	0.465	0.777	1.26	1.355	0.514	0.491	0.359	cytoplasm		GO:0005622 intracellular; GO:0005623 cell; GO:0005737 cytoplasm; GO:0044424 intracellular part; GO:0044464 cell part;		K15718	LOX1_5; linoleate 9S-lipoxygenase [EC:1.13.11.58]	map00591 Linoleic acid metabolism	PF00305	Lipoxygenase
TRINITY_DN34391_c0_g1	hypothetical protein MtrunA17_Chr1g0192921	0.265	Down	5.7125e-05	---	19.318	1.879	1.623	1.817	0.533	0.624	0.55	1.244	1.236	1.184	0.359	0.33	0.281	cytoplasm
TRINITY_DN20446_c0_g1	phosphoglucan phosphatase LSF2, chloroplastic	0.496	Down	0.005078	---	31.656		1.269	1.213		0.858	0.803		1.239	1.293		0.6	0.657	chloroplast	GO:0000272 polysaccharide catabolic process; GO:0005975 carbohydrate metabolic process; GO:0005976 polysaccharide metabolic process; GO:0005982 starch metabolic process; GO:0005983 starch catabolic process; GO:0006073 cellular glucan metabolic process; GO:0006793 phosphorus metabolic process; GO:0006796 phosphate-containing compound metabolic process; GO:0008152 metabolic process; GO:0009056 cata…	GO:0005622 intracellular; GO:0005623 cell; GO:0005737 cytoplasm; GO:0009507 chloroplast; GO:0009536 plastid; GO:0043226 organelle; GO:0043227 membrane-bounded organelle; GO:0043229 intracellular organelle; GO:0043231 intracellular membrane-bounded organelle; GO:0044424 intracellular part; GO:0044444 cytoplasmic part; GO:0044464 cell part;	GO:0001871 pattern binding; GO:0003824 catalytic activity; GO:0005488 binding; GO:0016787 hydrolase activity; GO:0016788 hydrolase activity, acting on ester bonds; GO:0016791 phosphatase activity; GO:0019203 carbohydrate phosphatase activity; GO:0030246 carbohydrate binding; GO:0030247 polysaccharide binding; GO:0042578 phosphoric ester hydrolase activity; GO:0050308 sugar-phosphatase activity; G…				PF00782	Dual specificity phosphatase, catalytic domain
TRINITY_DN22032_c0_g1	EXGT1	0.406	Down	0.01004	---	34.666	1.877		1.736	0.706		0.666	0.929		1.113	0.413		0.417	chloroplast				K08235	E2.4.1.207; xyloglucan:xyloglucosyl transferase [EC:2.4.1.207]		PF00722	Glycosyl hydrolases family 16
TRINITY_DN5986_c0_g1	lipoxygenase loxN2	0.461	Down	0.0020771	---	65.975	1.705	1.21	1.339	0.581	0.817	0.635	1.061	1.376	1.357	0.636	0.508	0.606	chloroplast				K15718	LOX1_5; linoleate 9S-lipoxygenase [EC:1.13.11.58]	map00591 Linoleic acid metabolism	PF00305	Lipoxygenase
TRINITY_DN5154_c0_g1	L-ascorbate oxidase homolog	0.481	Down	0.0036834	---	60.415	1.782	1.517	1.75	0.564	0.652	0.51	0.961	1.182	1.186	0.582	0.586	0.434	vacuolar membrane							PF07732; PF00394; PF07731	Multicopper oxidase; Multicopper oxidase; Multicopper oxidase
TRINITY_DN27264_c0_g1	40S ribosomal protein S6	0.638	Down	0.0106198	---	22.363	1.262	0.953	0.852	0.735	0.674	0.751	1.249	1.486	1.402	0.756	0.866	1.019	nucleus	GO:0006139 nucleobase-containing compound metabolic process; GO:0006364 rRNA processing; GO:0006396 RNA processing; GO:0006725 cellular aromatic compound metabolic process; GO:0006807 nitrogen compound metabolic process; GO:0008152 metabolic process; GO:0009719 response to endogenous stimulus; GO:0009725 response to hormone; GO:0009735 response to cytokinin; GO:0009987 cellular process; GO:001003…	GO:0005622 intracellular; GO:0005623 cell; GO:0005634 nucleus; GO:0005730 nucleolus; GO:0005737 cytoplasm; GO:0005829 cytosol; GO:0005840 ribosome; GO:0005844 polysome; GO:0005886 plasma membrane; GO:0005911 cell-cell junction; GO:0009506 plasmodesma; GO:0009507 chloroplast; GO:0009536 plastid; GO:0015935 small ribosomal subunit; GO:0016020 membrane; GO:0022626 cytosolic ribosome; GO:0022627 cyto…	GO:0003676 nucleic acid binding; GO:0003723 RNA binding; GO:0003729 mRNA binding; GO:0003735 structural constituent of ribosome; GO:0005198 structural molecule activity; GO:0005488 binding; GO:0097159 organic cyclic compound binding; GO:1901363 heterocyclic compound binding;	K02991	RP-S6e, RPS6; small subunit ribosomal protein S6e	map03010 Ribosome
TRINITY_DN24841_c0_g1	RecName: Full=L-ascorbate peroxidase, cytosolic; Short=AP; AltName: Full=PsAPx01	0.335	Down	0.00029585	---	27.109	1.825	1.615	1.786	0.593	0.639	0.462	1.022	1.225	1.145	0.365	0.336	0.435	cytoplasm				K00434	E1.11.1.11; L-ascorbate peroxidase [EC:1.11.1.11]	map00053 Ascorbate and aldarate metabolism; map00480 Glutathione metabolism; map01100 Metabolic pathways	PF00141	Peroxidase
[truncated: 9 more rows]

## Sheet: C_TvsE_T
Table S1 DEPs in the comparison of C_T_E_T
Protein accession	Protein description	C_T/E_T Ratio	Regulated Type	E_T/C_T P value	Gene name	MW [kDa]	C_CK.C_CK_3	C_CK.C_CK_2	C_CK.C_CK_1	C_T.C_T_3	C_T.C_T_2	C_T.C_T_1	E_CK.E_CK_3	E_CK.E_CK_2	E_CK.E_CK_1	E_T.E_T_3	E_T.E_T_2	E_T.E_T_1	Subcellular localization	Biological Process	Cellular Component	Molecular Function	KEGG KO No.	KEGG Gene	KEGG pathway	Pfam ID	Domain description
TRINITY_DN20926_c0_g1	hypothetical protein TSUD_353590	7.69305	Up	0.00061914	---	36.158	1.951	0.857	1.249	1.819	2.255	2.342	0.304	0.351	0.217	0.222	0.396	0.216	chloroplast
[truncated: 168 more rows]

## Sheet: C_CKvsE_CK
Table S1 DEPs in the comparison of C_CK_E_CK
[truncated: 164 more rows]
