# Supplementary material for: Isobaric Tags for Relative and Absolute Quantitation-Based Proteomics Analysis Revealed Proteins Involved in Drought Response during the Germination Stage in Faba Bean
Source: Metabolites. 2024 Mar 21;14(3):175. doi: 10.3390/metabo14030175 (PMC10971895; doi:10.3390/metabo14030175)
Supplement: Supplementary file 1 [file metabolites-14-00175-s001.zip › Table S2.xlsx]

## Sheet: Sheet1
Table S2 Go enrichment of DEPs with significance in the comparison of C_T_E_T
GO Terms Level 1	GO Terms Description	GO Terms Level	GO Terms ID	Mapping	Background	All Mapping	All Background	Fold Enrichment	Fisher' exact test P value	-log10(p value)	Related Protein
Cellular Component	chromosome	4	GO:0005694	8	64	99	2388	3.02	0.00424499	2.37	TRINITY_DN37953_c0_g1 TRINITY_DN402_c0_g1 TRINITY_DN40965_c0_g1 TRINITY_DN43705_c0_g1 TRINITY_DN31383_c0_g1 TRINITY_DN43874_c0_g1 TRINITY_DN7191_c0_g1 TRINITY_DN10385_c0_g1
	anchored component of plasma membrane	4	GO:0046658	5	27	99	2388	4.47	0.00431762	2.36	TRINITY_DN29728_c0_g1 TRINITY_DN23267_c0_g1 TRINITY_DN2437_c0_g1 TRINITY_DN10774_c0_g1 TRINITY_DN36454_c0_g1
	anchored component of membrane	3	GO:0031225	5	27	99	2388	4.47	0.00431762	2.36	TRINITY_DN29728_c0_g1 TRINITY_DN23267_c0_g1 TRINITY_DN2437_c0_g1 TRINITY_DN10774_c0_g1 TRINITY_DN36454_c0_g1
	intrinsic component of plasma membrane	3	GO:0031226	6	41	99	2388	3.53	0.00603314	2.22	TRINITY_DN29728_c0_g1 TRINITY_DN23267_c0_g1 TRINITY_DN2437_c0_g1 TRINITY_DN10774_c0_g1 TRINITY_DN20923_c0_g1 TRINITY_DN36454_c0_g1
	organelle lumen	2	GO:0043233	22	328	99	2388	1.62	0.0125812	1.9	TRINITY_DN772_c0_g1 TRINITY_DN38280_c0_g1 TRINITY_DN8052_c0_g1 TRINITY_DN7191_c0_g1 TRINITY_DN32624_c0_g1 TRINITY_DN20223_c0_g1 TRINITY_DN33121_c0_g1 TRINITY_DN25602_c0_g1 TRINITY_DN5810_c0_g1 TRINITY_DN20791_c0_g1 TRINITY_DN28058_c0_g1 TRINITY_DN31383_c0_g1 TRINITY_DN10385_c0_g1 TRINITY_DN20102_c0_g1 TRINITY_DN3139_c0_g1 TRINITY_DN7931_c0_g1 TRINITY_DN23198_c0_g1 TRINITY_DN1825_c0_g1 TRINITY_DN1…
	intracellular organelle lumen	3	GO:0070013	22	328	99	2388	1.62	0.0125812	1.9	TRINITY_DN772_c0_g1 TRINITY_DN38280_c0_g1 TRINITY_DN8052_c0_g1 TRINITY_DN7191_c0_g1 TRINITY_DN32624_c0_g1 TRINITY_DN20223_c0_g1 TRINITY_DN33121_c0_g1 TRINITY_DN25602_c0_g1 TRINITY_DN5810_c0_g1 TRINITY_DN20791_c0_g1 TRINITY_DN28058_c0_g1 TRINITY_DN31383_c0_g1 TRINITY_DN10385_c0_g1 TRINITY_DN20102_c0_g1 TRINITY_DN3139_c0_g1 TRINITY_DN7931_c0_g1 TRINITY_DN23198_c0_g1 TRINITY_DN1825_c0_g1 TRINITY_DN1…
	plasma membrane part	2	GO:0044459	6	51	99	2388	2.84	0.0173062	1.76	TRINITY_DN29728_c0_g1 TRINITY_DN23267_c0_g1 TRINITY_DN2437_c0_g1 TRINITY_DN10774_c0_g1 TRINITY_DN20923_c0_g1 TRINITY_DN36454_c0_g1
	nuclear chromatin	5	GO:0000790	3	14	99	2388	5.17	0.0180332	1.74	TRINITY_DN43705_c0_g1 TRINITY_DN31383_c0_g1 TRINITY_DN7191_c0_g1
Molecular Function	glutathione transferase activity	4	GO:0004364	5	16	73	1838	7.87	0.000267375	3.57	TRINITY_DN29472_c0_g1 TRINITY_DN29341_c0_g1 TRINITY_DN34086_c0_g1 TRINITY_DN23725_c0_g1 TRINITY_DN28458_c0_g1
	methionine adenosyltransferase activity	4	GO:0004478	3	5	73	1838	15.11	0.000568058	3.25	TRINITY_DN7866_c0_g1 TRINITY_DN9508_c0_g1 TRINITY_DN32112_c0_g1
	aldehyde dehydrogenase [NAD(P)+] activity	5	GO:0004030	2	2	73	1838	25.18	0.00155668	2.81	TRINITY_DN8301_c0_g1 TRINITY_DN6990_c0_g1
	coniferyl-aldehyde dehydrogenase activity	6	GO:0050269	2	2	73	1838	25.18	0.00155668	2.81	TRINITY_DN8301_c0_g1 TRINITY_DN6990_c0_g1
	peptide-methionine (R)-S-oxide reductase activity	5	GO:0033743	2	2	73	1838	25.18	0.00155668	2.81	TRINITY_DN34336_c0_g1 TRINITY_DN29261_c0_g1
	pectinesterase inhibitor activity	4	GO:0046910	3	13	73	1838	5.81	0.0129061	1.89	TRINITY_DN56274_c0_g1 TRINITY_DN37893_c0_g1 TRINITY_DN4757_c0_g1
	magnesium ion binding	5	GO:0000287	3	19	73	1838	3.98	0.0368702	1.43	TRINITY_DN2758_c0_g1 TRINITY_DN33327_c0_g1 TRINITY_DN49475_c0_g1
	beta-galactosidase activity	6	GO:0004565	2	8	73	1838	6.29	0.0373083	1.43	TRINITY_DN558_c0_g1 TRINITY_DN28058_c0_g1
Biological Process	response to high light intensity	6	GO:0009644	3	14	86	2133	5.31	0.0166898	1.78	TRINITY_DN28961_c0_g1 TRINITY_DN28564_c0_g1 TRINITY_DN5516_c0_g1
	negative regulation of gene expression, epigenetic	7	GO:0045814	2	7	86	2133	7.09	0.0295726	1.53	TRINITY_DN43705_c0_g1 TRINITY_DN31383_c0_g1
