# Supplementary material for: Isobaric Tags for Relative and Absolute Quantitation-Based Proteomics Analysis Revealed Proteins Involved in Drought Response during the Germination Stage in Faba Bean
Source: Metabolites. 2024 Mar 21;14(3):175. doi: 10.3390/metabo14030175 (PMC10971895; doi:10.3390/metabo14030175)
Supplement: Supplementary file 1 [file metabolites-14-00175-s001.zip › Table S3.xlsx]

## Sheet: Sheet1
Table S3 KEGG enrichment of the DEPs with significance in the comparison of C_T_E_T
KEGG pathway	Mapping	Background	All Mapping	All Background	Fold enrichment	Fisher's exact test p value	-log10(p value)	Related proteins
map00480 Glutathione metabolism	8	51	63	1718	4.28	0.000381351	3.42	TRINITY_DN34338_c0_g1 TRINITY_DN29341_c0_g1 TRINITY_DN31537_c0_g1 TRINITY_DN23725_c0_g1 TRINITY_DN28458_c0_g1 TRINITY_DN31773_c0_g1 TRINITY_DN29472_c0_g1 TRINITY_DN34086_c0_g1
map04141 Protein processing in endoplasmic reticulum	11	125	63	1718	2.4	0.00458381	2.34	TRINITY_DN41845_c0_g1 TRINITY_DN772_c0_g1 TRINITY_DN36890_c0_g1 TRINITY_DN28564_c0_g1 TRINITY_DN8052_c0_g1 TRINITY_DN34992_c0_g1 TRINITY_DN28961_c0_g1 TRINITY_DN38225_c0_g1 TRINITY_DN40407_c0_g1 TRINITY_DN25041_c0_g1 TRINITY_DN37075_c0_g1
map00902 Monoterpenoid biosynthesis	2	6	63	1718	9.09	0.0180522	1.74	TRINITY_DN26374_c0_g1 TRINITY_DN19785_c0_g1
map00592 alpha-Linolenic acid metabolism	3	22	63	1718	3.72	0.0440251	1.36	TRINITY_DN12895_c0_g1 TRINITY_DN14903_c0_g1 TRINITY_DN625_c0_g1
