# Supplementary material for: Isobaric Tags for Relative and Absolute Quantitation-Based Proteomics Analysis Revealed Proteins Involved in Drought Response during the Germination Stage in Faba Bean
Source: Metabolites. 2024 Mar 21;14(3):175. doi: 10.3390/metabo14030175 (PMC10971895; doi:10.3390/metabo14030175)
Supplement: Supplementary file 1 [file metabolites-14-00175-s001.zip › Table S4.xlsx]

## Sheet: Sheet1
Table S4 DEPs for constructed PPI network
ID	Degree	Log2Ratio	Protein accession	Protein description	Ratio	Regulated Type	P value	Gene name	MW [kDa]	C_CK.C_CK_3	C_CK.C_CK_2	C_CK.C_CK_1	C_T.C_T_3	C_T.C_T_2	C_T.C_T_1	E_CK.E_CK_3	E_CK.E_CK_2	E_CK.E_CK_1	E_T.E_T_3	E_T.E_T_2	E_T.E_T_1
41	1	-0.648372	TRINITY_DN8301_c0_g1	aldehyde dehydrogenase family 2 member C4	0.638	Down	0.0022184	---	24.855	1.282	1.243	1.339	1.089	1.194	0.988	1.007	0.814	0.938	0.65	0.725	0.711
42	1	-0.99137	TRINITY_DN8052_c0_g1	PREDICTED: calreticulin isoform X2	0.503	Down	0.00036104	---	26.451	1.273	1.249	1.311	1.334	1.513	1.246	0.604	0.603	0.716	0.706	0.656	0.696
4	2	-0.880976	TRINITY_DN772_c0_g1	endoplasmin homolog	0.543	Down	0.0148166	---	41.62	1.62	1.677	1.288	1.248	1.158	1.044	0.617	0.725	0.901	0.653	0.465	0.756
30	2	-0.659723	TRINITY_DN7652_c0_g1	acetyl-CoA acetyltransferase, cytosolic 1	0.633	Down	0.032583	---	42.331	1.141	1.063	1.252	1.354	1.078	1.065	0.993	0.972	0.879	0.572	0.851	0.791
38	2	-0.595097	TRINITY_DN727_c0_g1	sucrose synthase isoform 3	0.662	Down	0.043555	---	91.922	1.581	1.704	1.75	0.905	0.752	0.696	1.036	1.011	1.061	0.649	0.475	0.434
23	8	-0.614845	TRINITY_DN7191_c0_g1	protein HGV2	0.653	Down	0.0137799	---	50.458	1.378	1.441	1.259	1.087	1.015	0.999	0.788	0.994	0.993	0.673	0.56	0.793
11	1	-1.31473	TRINITY_DN6990_c0_g1	aldehyde dehydrogenase family 2 member C4	0.402	Down	0.04484	---	54.056	1.111	1.413	1.46	1.522	1.553	0.796	1.013	0.697	0.929	0.428	0.356	0.772
34	1	0.750178	TRINITY_DN6578_c0_g1	methylmalonate-semialdehyde dehydrogenase	1.682	Up	0.0027846	---	54.124		0.789	0.8		0.736	0.702		1.31	1.316		1.192	1.226
19	6	-0.612637	TRINITY_DN52575_c0_g1	uncharacterized protein	0.654	Down	0.0104793	---	11.409	1.265	1.271	1.213	1.296	1.226	1.02	0.661	0.724	1.048	0.839	0.789	0.688
27	1	-0.854649	TRINITY_DN4982_c0_g1	granule-bound starch synthase	0.553	Down	0.0033585	---	40.188	1.127	1.1	0.999	1.519	1.293	1.148	0.768	0.864	1.137	0.667	0.787	0.735
5	1	-0.766112	TRINITY_DN4744_c0_g1	UDP-glucuronate 4-epimerase 6	0.588	Down	0.038518	---	50.017	1.544	1.241	1.342	0.85	0.642	0.626	1.261	1.637	1.524	0.317	0.396	0.532
12	8	1.60644	TRINITY_DN47036_c0_g1	40S ribosomal protein S16-like	3.045	Up	0.00029795	---	16.325	0.495	0.43	0.398	0.497	0.467	0.557	1.305	1.66	1.751	1.786	1.474	1.372
10	4	1.74674	TRINITY_DN43874_c0_g1	PREDICTED: histone H2B.7-like	3.356	Up	0.025557	---	16.274		0.38	0.388		0.43	0.437		1.514	2.05		1.734	1.176
24	4	-0.746616	TRINITY_DN43705_c0_g1	PREDICTED: probable histone H2A.3	0.596	Down	0.005084	---	13.963	1.022	1.406	1.154	1.351	1.44	1.186	0.805	0.456	0.956	0.907	0.752	0.71
3	4	-0.793357	TRINITY_DN40965_c0_g1	RecName: Full=Histone H2A.2	0.577	Down	0.0154649	---	16.863	0.873	1.51	1.237	1.697	1.421	1.152	0.629	0.394	0.806	0.931	0.721	0.811
28	1	-0.83908	TRINITY_DN40670_c0_g1	hypothetical protein TSUD_09880	0.559	Down	0.0033796	---	21.49	1.16	1.13	1.255	1.197	1.07	0.908	1.116	1.152	1.242	0.572	0.647	0.557
14	3	-0.68966	TRINITY_DN402_c0_g1	minichromosome maintenance 2 protein	0.62	Down	0.020777	---	105.56	1.631	1.439	1.6	0.766	1.001	0.672	1.083	0.997	1.164	0.484	0.477	0.551
0	7	0.687956	TRINITY_DN40106_c0_g1	40S ribosomal protein S26-3	1.611	Up	0.0077377	---	14.899	0.958	0.916	0.976	0.714	0.574	0.761	1.167	1.432	1.25	1.202	1.069	1.03
22	10	0.747602	TRINITY_DN39286_c0_g1	ribosomal protein L27 homolog	1.679	Up	0.00075854	---	15.654	1.008	0.91	1.069	0.631	0.714	0.719	1.152	1.276	1.115	1.241	1.113	1.111
9	11	0.9568	TRINITY_DN38280_c0_g1	hypothetical protein TSUD_400370	1.941	Up	0.024758	---	17.21	0.847	0.65	0.918	0.75	0.543	0.898	1.165	1.112	1.045	1.296	1.77	1.186
26	4	-0.648372	TRINITY_DN37427_c0_g1	hypothetical protein PHAVU_011G087500g	0.638	Down	0.00184183	---	12.614	0.97	1.055	1.028	1.514	1.339	1.433	0.624	0.751	0.739	0.977	0.933	0.826
20	1	-1.71786	TRINITY_DN36741_c0_g1	uncharacterized protein LOC101500782	0.304	Down	0.00105635	---	19.349	1.083	0.829	0.981	1.417	2.089	2.076	0.831	0.668	0.457	0.625	0.526	0.547
17	10	0.725087	TRINITY_DN36095_c0_g1	40S ribosomal protein S17	1.653	Up	0.0083375	---	16.308	0.872	1.04	0.876	0.6	0.728	0.85	1.323	1.27	1.179	1.274	1.177	1.149
7	3	-1.16165	TRINITY_DN33327_c0_g1	putative dUTP diphosphatase	0.447	Down	0.0053416	---	15.838	1.44	1.406	1.416	1.023	0.974	0.864	0.9	1.225	1.264	0.549	0.343	0.386
32	5	-0.671164	TRINITY_DN32564_c0_g1	eukaryotic translation initiation factor 5A-2	0.628	Down	0.022521	---	17.279	0.957	0.984	1.02	1.504	1.408	1.212	0.99	0.703	0.96	0.685	1.012	0.891
33	7	-0.75877	TRINITY_DN32173_c0_g1	eukaryotic translation initiation factor 5A-5-like isoform X1	0.591	Down	0.02116	---	17.291	1.161	1.218	1.33	1.308	1.276	0.908	1	0.806	0.991	0.587	0.734	0.744
8	4	-0.935117	TRINITY_DN31383_c0_g1	putative transcription factor Hap3/NF-YB family	0.523	Down	0.021959	---	18.183	1.35	1.517		1.266	1.242		0.706	0.659		0.72	0.592
6	1	1.82863	TRINITY_DN28961_c0_g1	RecName: Full=Small heat shock protein, chloroplastic; Flags: Precursor	3.552	Up	0.0029649	---	26.134	0.391	0.435	0.85	0.392	0.42	0.495	1.649	1.522	1.171	1.567	1.536	1.539
29	1	1.25701	TRINITY_DN28769_c0_g1	oxygen-evolving enhancer protein 3 precursor	2.39	Up	0.046735	---	25.22		0.794	0.753		0.551	0.618		1.51	1.06		1.144	1.65
37	1	-1.25498	TRINITY_DN28156_c0_g1	hypothetical protein TSUD_368720	0.419	Down	0.0160398	---	14.437	0.637	1.08	1.018	1.551	1.9	1.548	0.824	0.638	0.897	1.022	0.505	0.569
40	1	0.919912	TRINITY_DN25041_c0_g1	RecName: Full=22.7 kDa class IV heat shock protein; Flags: Precursor	1.892	Up	0.0178192	---	23.086	0.517	0.592	0.823	0.92	0.662	0.584	1.133	1.565	1.155	1.541	1.119	1.439
16	8	1.13093	TRINITY_DN24528_c0_g1	60S ribosomal protein L7a-2	2.19	Up	0.022761	---	29.467	0.643	0.66	0.661	0.641	0.346	0.679	1.719	1.644	1.466	1.05	1.35	1.249
15	10	0.932817	TRINITY_DN23700_c0_g1	hypothetical protein TSUD_233150	1.909	Up	0.0149982	---	29.928	0.935	0.881	1.083	0.613	0.605	0.699	0.917	1.414	1.246	1.585	1.099	0.975
25	1	1.04963	TRINITY_DN23601_c0_g1	light-harvesting chlorophyll-a/b binding protein Lhcb1	2.07	Up	0.0076174	---	28.362	0.518	0.658	0.456	0.713	0.832	0.626	1.659	1.314	1.154	1.301	1.321	1.873
18	7	-0.610433	TRINITY_DN22674_c0_g1	nascent polypeptide-associated complex subunit alpha-like protein	0.655	Down	0.0079779	---	24.77	1.314	1.085	1.045	1.195	1.078	1.112	0.881	1.053	0.961	0.636	0.738	0.844
2	2	-0.85726	TRINITY_DN2264_c0_g1	putative plus-end-directed kinesin ATPase	0.552	Down	0.020024	---	82.161	0.989	1.096		1.324	1.456		1.05	0.693		0.713	0.822
31	1	-0.710756	TRINITY_DN22440_c0_g1	putative SOUL heme-binding protein	0.611	Down	0.0024762	---	27.335	1.294	1.13	1.333	1.301	1.407	1.148	0.697	0.744	0.671	0.73	0.784	0.843
36	11	0.865523	TRINITY_DN20791_c0_g1	60S ribosomal protein L5-like	1.822	Up	0.034856	---	36.537	0.96		0.847	0.762		0.615	1.019		1.311	1.31		1.199
13	2	0.993493	TRINITY_DN20102_c0_g1	LOW QUALITY PROTEIN: uncharacterized protein LOC101506798	1.991	Up	0.03236	---	22.375	0.959		0.849	0.69		0.59	0.998		1.438	1.401		1.148
39	1	0.586885	TRINITY_DN17681_c0_g1	signal peptide peptidase-like	1.502	Up	0.0107601	---	37.974	0.917	0.837	0.948	0.754	0.955	0.734	1.068	1.089	1.164	1.315	1.169	1.185
35	1	0.705757	TRINITY_DN17039_c0_g1	probable enoyl-CoA hydratase 2, mitochondrial	1.631	Up	0.00087749	---	32.603	0.646	0.712	0.772	0.752	0.689	0.797	1.416	1.371	1.343	1.259	1.258	1.133
1	1	0.825379	TRINITY_DN14903_c0_g1	RecName: Full=Alcohol dehydrogenase 1	1.772	Up	0.020141	---	33.41	0.792	0.663	0.829	1.007	0.708	0.712	1.136	1.063	1.108	1.248	1.73	1.322
21	1	1.03914	TRINITY_DN12895_c0_g1	RecName: Full=Alcohol dehydrogenase 1	2.055	Up	0.0139374	---	41.194	0.803	0.931	0.498	0.617	0.72	0.578	1.653	1.136	1.38	0.963	1.334	1.638
