# Supplementary figures and images for: Isobaric Tags for Relative and Absolute Quantitation-Based Proteomics Analysis Revealed Proteins Involved in Drought Response during the Germination Stage in Faba Bean
Source: MDPI journal article supplement (doi:10.3390/metabo14030175), 2024-03-21

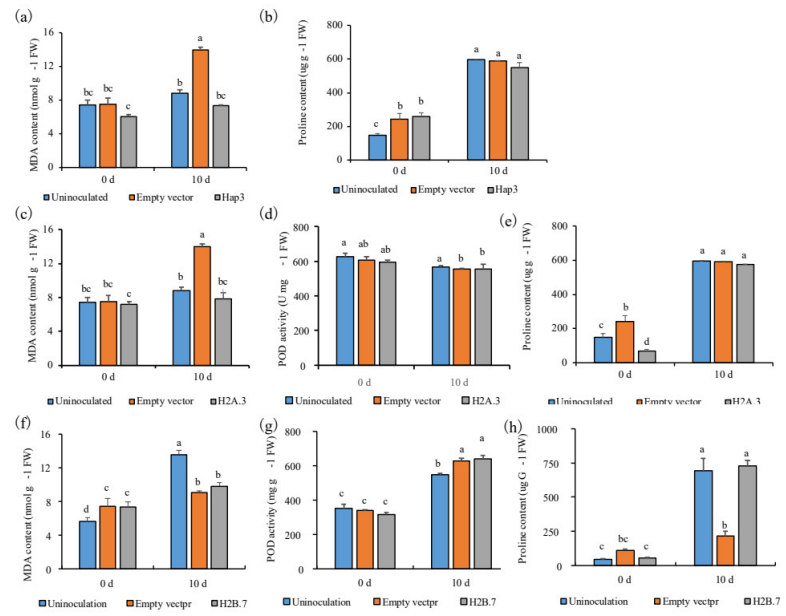

**Figure S1.** Physiological elements of the transgenic and control plants.

Supplement: s1 [file s1]
